# Supplementary material for: Pezizomycetes genomes reveal the molecular basis of ectomycorrhizal truffle lifestyle
Source: Springer Nature journal article supplement (doi:10.1038/s41559-018-0710-4), 2018-10-30
Supplement: MOESM3 [file 41559_2018_710_MOESM3_ESM.xlsx]

## Sheet: Table 1
Supplementary Table 1. Conservation of genes involved in RIP-like genome defense in the sequenced Pezizomycetes.
	Proteins	A. immersus	C. venosus	M. conica	P confluens	Te. boudieri	T. aestivum	T. magnatum	T. melanosporum
RID/MIP essential	RID /Masc1	1	1	1	1	1	1	1	1
DNA methylation	DIM-2	2	1	1	2	1	1	1	1
DCDC	DIM-5	1	1	1	1	1	1	1	1
	DIM-7	0	0	0	0	0	0	0	0
	DDB1	1	1	1	1	1	1	1	1
	DIM-9	0	0	0	0	0	0	0	0
	CUL-4	1	1	1	1	1	1	1	1
DMM	DMM1	0	1	1	1	1	1	1	1
	DMM2	0	0	0	0	0	0	0	0
HCHC	HP1	1	1	1	1	1	1	1	1
	HDA-1	1	1	1	1	1	1	1	1
	CHAP	0	0	0	0	0	0	0	0
	CDP-2	0	0	0	0	0	0	0	0

## Sheet: Table 2
Supplementary Table 2. Structural features of total genes, species-specific genes and shared (non-specific) genes in the sequenced Pezizomycetes.
Species	Gene set	# genes	# genes with PFAM	# exons per gene	# introns per gene	Protein length average	# genes with signal peptide	# genes with transmembrane domain	# genes expressed
Ascobolus immersus	All genes	17877	6509 (36.41%)	2.58***	1.58***	411***	1958 (10.95%)	2647 (14.81%)	12292 (68.76%)
	Non specific genes	3978	3621 (91.03%)	3.43***	2.43***	461***	723 (18.17%)	762 (19.16%)	3839 (96.51%)
	Specific genes	13899	2888 (20.78%)	2.33	1.33	396	1235 (8.89%)	1885 (13.56%)	8453 (60.82%)
Choiromyces venosus	All genes	17986	7595 (42.23%)	2.72***	1.72***	302***	1559 (8.67%)	3038 (16.89%)	15614 (86.81%)
	Non specific genes	9279	6599 (71.12%)	3.7***	2.7***	443***	1096 (11.81%)	1474 (15.89%)	8047 (86.72%)
	Specific genes	8707	996 (11.44%)	1.68	0.68	152	463 (5.32%)	1564 (17.96%)	7567 (86.91%)
Morchella importuna	All genes	11600	6637 (57.22%)	3.38***	2.38***	410***	1318 (11.36%)	2334 (20.12%)	10908 (94.03%)
	Non specific genes	6108	5283 (86.49%)	4.15***	3.15***	487***	716 (11.72%)	1177 (19.27%)	6007 (98.35%)
	Specific genes	5492	1354 (24.65%)	2.53	1.53	325	602 (10.96%)	1157 (21.07%)	4901 (89.24%)
Pyronema confluens	All genes	13367	6406 (47.92%)	2.69***	1.69***	364***	1311 (9.81%)	2036 (15.23%)	10461 (78.26%)
	Non specific genes	6195	5344 (86.26%)	3.42***	2.42***	507***	572 (9.23%)	1198 (19.34%)	6063 (97.87%)
	Specific genes	7172	1062 (14.81%)	2.05	1.05	241	739 (10.3%)	838 (11.68%)	4398 (61.32%)
Terfezia boudieri	All genes	12114	5975 (49.32%)	2.97***	1.97***	388***	1016 (8.39%)	2023 (16.7%)	10505 (86.72%)
	Non specific genes	4596	4016 (87.38%)	4.03***	3.03***	451***	465 (10.12%)	834 (18.15%)	4470 (97.26%)
	Specific genes	7518	1959 (26.06%)	2.33	1.33	349	551 (7.33%)	1189 (15.82%)	6035 (80.27%)
Tuber aestivum	All genes	9344	6197 (66.32%)	3.55***	2.55***	455***	821 (8.79%)	1537 (16.45%)	8316 (89.0%)
	Non specific genes	7978	5841 (73.21%)	3.8***	2.8***	497***	729 (9.14%)	1398 (17.52%)	7348 (92.1%)
	Specific genes	1366	356 (26.06%)	2.13	1.13	209	92 (6.73%)	139 (10.18%)	968 (70.86%)
Tuber magnatum	All genes	9433	5921 (62.77%)	3.69***	2.69***	407***	821 (8.7%)	1571 (16.65%)	8099 (85.86%)
	Non specific genes	8190	5774 (70.5%)	3.86***	2.86***	442***	750 (9.16%)	1402 (17.12%)	7439 (90.83%)
	Specific genes	1243	147 (11.83%)	2.56	1.56	178	71 (5.71%)	169 (13.6%)	660 (53.1%)
Tuber melanosporum	All genes	10058	6202 (61.66%)	3.4***	2.4***	416***	806 (8.01%)	1651 (16.41%)	7399 (73.56%)
	Non specific genes	8697	5930 (68.18%)	3.64***	2.64***	456***	722 (8.3%)	1516 (17.43%)	6934 (79.73%)
	Specific genes	1361	272 (19.99%)	1.87	0.87	155	84 (6.17%)	135 (9.92%)	465 (34.17%)
*** Significantly higher (Wilcoxon test P-value < 0.005) than for specific gene

## Sheet: Table 3 
Supplementary Table 3. Distribution of CAZymes in the sequenced Pezizomycetes.
Species	Glycoside Hydrolase (GH)	GlycosylTransferase (GT)	Polysaccharide Lyases (PL)	Carbohydrate Esterases (CE)	Carbohydrate-Binding-Modules (CBM)	Auxiliary Activities (AA)	Total
Ascobolus_immersus_RN42_(Ascim1)	133	64	3	51	104	86	441
Choiromyces_venosus_120613-1_(Chove1)	151	64	13	25	48	53	354
Morchella_conica_CCBAS932_(Morco1)	176	68	21	26	50	53	394
Pyronema_confluens_(omphalodes)_(Pyrco1)	131	72	5	25	41	47	321
Terfezia_boudieri_ATCC_MYA-4762_v1.1_(Terbo2)	89	68	2	11	24	24	218
Tuber_aestivum (Tubae1)	105	62	3	12	33	34	249
Tuber_magnatum_v1_(Tubma1)	95	61	3	13	27	29	228
Tuber_melanosporum_(Tubme1)	87	61	3	10	26	29	216
Glycoside Hydrolase (GH) families	1	2	3	5	5_4	5_5	5_7	5_9	5_12	5_15	5_16	5_22	5_31	5_49	6	7	10	11	12	13	15	16	17	18	20	23	24	25	26	27	28	29	30	31	32	35	36	37	38	39	43	45	47	51	53	55	63	65	71
Ascobolus_immersus_RN42_(Ascim1)	1	2	8	1	0	2	2	3	1	0	0	2	0	0	4	5	7	2	0	4	2	11	8	8	1	0	0	1	1	1	1	0	2	4	1	0	2	1	1	0	6	1	9	1	1	3	1	1	0
Choiromyces_venosus_120613-1_(Chove1)	2	3	10	1	1	1	2	2	2	2	0	1	0	0	3	0	3	0	1	8	1	10	7	7	2	0	1	1	1	5	4	0	0	8	1	4	2	1	1	0	7	1	5	2	1	3	1	1	0
Morchella_conica_CCBAS932_(Morco1)	3	4	12	0	2	1	3	3	2	2	1	2	0	0	3	2	3	0	1	7	2	10	7	4	2	0	0	0	2	7	5	0	0	9	1	5	2	1	1	1	12	1	5	5	1	2	1	1	1
Pyronema_confluens_(omphalodes)_(Pyrco1)	1	2	8	0	1	1	1	2	2	1	0	2	0	1	1	2	3	0	1	5	2	14	5	5	1	0	2	0	1	3	2	0	0	5	1	1	2	1	1	0	5	0	5	2	0	1	1	1	1
Terfezia_boudieri_ATCC_MYA-4762_v1.1_(Terbo2)	1	2	7	0	0	1	1	3	3	0	0	1	0	0	0	1	1	0	0	4	2	8	6	4	1	0	1	0	0	0	1	0	0	5	1	1	1	1	1	0	1	0	4	0	1	1	1	1	1
Tuber_aestivum	2	2	8	0	0	1	0	1	2	0	0	2	0	0	1	0	1	0	1	8	1	7	4	5	3	1	1	1	0	0	3	1	0	5	1	0	3	0	1	0	2	0	5	0	0	3	1	1	0
Tuber_magnatum_v1_(Tubma1)	2	2	6	0	0	1	0	2	2	0	0	0	0	0	3	0	1	0	1	6	1	8	5	5	2	0	1	1	0	0	2	0	0	4	1	0	2	0	1	0	1	1	5	1	0	3	1	1	0
Tuber_melanosporum_(Tubme1)	2	2	7	0	0	1	0	2	2	1	0	0	0	0	0	0	1	0	1	8	1	7	4	5	2	0	1	1	0	0	2	0	0	5	1	0	2	0	1	0	1	1	5	0	0	2	1	1	0
Glycosyl Transferase (GT) families	1	2	3	4	5	8	15	20	21	22	23	24	25	31	32	33	34	35	39	41	48	50	57	58	59	62	66	69	71	76	90	Total
Ascobolus_immersus_RN42_(Ascim1)	4	9	1	4	0	3	5	2	1	4	0	1	0	1	2	1	5	1	2	1	1	1	2	1	1	3	1	2	0	1	4	64
Choiromyces_venosus_120613-1_(Chove1)	5	10	1	4	1	4	5	3	1	4	0	1	0	0	2	1	2	1	3	1	1	1	2	1	1	3	1	3	0	1	1	64
Morchella_conica_CCBAS932_(Morco1)	5	11	1	4	0	4	5	3	1	4	1	1	0	0	2	1	3	1	3	1	1	1	3	1	1	3	1	2	0	1	3	68
Pyronema_confluens_(omphalodes)_(Pyrco1)	5	12	1	4	0	5	5	3	1	4	0	1	1	0	2	1	6	1	3	1	1	1	2	1	1	3	1	2	1	1	2	72
Terfezia_boudieri_ATCC_MYA-4762_v1.1_(Terbo2)	6	10	1	5	0	5	3	3	2	4	0	1	4	1	3	1	3	1	3	1	1	1	2	1	1	3	1	0	0	1	0	68
Tuber_aestivum	5	11	1	3	1	3	6	3	1	4	0	1	0	0	2	1	2	1	3	1	1	0	2	1	1	3	1	2	0	1	1	62
Tuber_magnatum_v1_(Tubma1)	5	10	1	4	1	3	5	3	1	4	0	1	0	0	2	2	2	1	3	1	1	0	2	1	1	3	1	1	0	1	1	61
Tuber_melanosporum_(Tubme1)	5	10	1	3	1	2	5	3	1	4	0	1	0	0	2	1	2	1	3	1	2	1	2	1	1	3	1	2	0	1	1	61
Polysaccharide Lyases (PL) families	1	3	4	7	9	14	Total
Ascobolus_immersus_RN42_(Ascim1)	1	1	1	0	0	0	3
Choiromyces_venosus_120613-1_(Chove1)	6	3	4	0	0	0	13
Morchella_conica_CCBAS932_(Morco1)	11	4	6	0	0	0	21
Pyronema_confluens_(omphalodes)_(Pyrco1)	2	2	1	0	0	0	5
Terfezia_boudieri_ATCC_MYA-4762_v1.1_(Terbo2)	0	1	1	0	0	0	2
Tuber_aestivum	1	0	1	0	0	1	3
Tuber_magnatum_v1_(Tubma1)	2	0	1	0	0	0	3
Tuber_melanosporum_(Tubme1)	2	0	1	0	0	0	3
Carbohydrate Esterases (CE) families	1	3	4	5	8	9	12	15	16	Total
Ascobolus_immersus_RN42_(Ascim1)	8	9	9	17	1	0	1	3	3	51
Choiromyces_venosus_120613-1_(Chove1)	1	0	8	6	2	0	5	0	3	25
Morchella_conica_CCBAS932_(Morco1)	2	1	8	6	2	0	3	0	4	26
Pyronema_confluens_(omphalodes)_(Pyrco1)	1	1	5	10	1	1	3	0	3	25
Terfezia_boudieri_ATCC_MYA-4762_v1.1_(Terbo2)	0	0	3	3	1	0	1	0	3	11
Tuber_aestivum	0	0	6	1	1	0	3	0	1	12
Tuber_magnatum_v1_(Tubma1)	0	0	7	2	1	0	2	0	1	13
Tuber_melanosporum_(Tubme1)	0	0	8	0	0	0	1	0	1	10
Carbohydrate-Binding-Modules (CBM) families	1	13	14	18	21	32	35	43	48	50	52	63	Total
Ascobolus_immersus_RN42_(Ascim1)	43	0	0	22	2	0	2	1	5	25	3	1	104
Choiromyces_venosus_120613-1_(Chove1)	9	6	0	18	2	1	1	1	3	5	2	0	48
Morchella_conica_CCBAS932_(Morco1)	18	2	0	17	3	1	5	0	2	0	2	0	50
Pyronema_confluens_(omphalodes)_(Pyrco1)	6	0	11	14	2	1	2	1	2	0	2	0	41
Terfezia_boudieri_ATCC_MYA-4762_v1.1_(Terbo2)	3	0	0	13	2	1	0	1	3	1	0	0	24
Tuber_aestivum	2	0	0	18	2	1	0	1	3	3	3	0	33
Tuber_magnatum_v1_(Tubma1)	0	0	0	15	2	1	0	1	2	4	2	0	27
Tuber_melanosporum_(Tubme1)	3	0	0	13	2	1	0	1	3	0	3	0	26
Auxiliary Activities (AA) families	1	2	3	4	5	6	7	8	9	11	12	Total
Ascobolus_immersus_RN42_(Ascim1)	6	1	25	0	2	1	3	6	33	6	3	86
Choiromyces_venosus_120613-1_(Chove1)	6	1	8	0	1	1	2	2	17	14	1	53
Morchella_conica_CCBAS932_(Morco1)	4	1	10	0	1	1	1	3	23	8	1	53
Pyronema_confluens_(omphalodes)_(Pyrco1)	3	2	16	1	1	1	2	2	10	9	0	47
Terfezia_boudieri_ATCC_MYA-4762_v1.1_(Terbo2)	3	2	2	0	1	1	1	0	3	10	1	24
Tuber_aestivum	6	1	6	0	1	1	1	1	4	12	1	34
Tuber_magnatum_v1_(Tubma1)	7	0	6	0	1	1	1	0	3	9	1	29
Tuber_melanosporum_(Tubme1)	5	1	6	0	1	1	1	1	2	10	1	29
[truncated: 23 more columns]

## Sheet: Table 4 
Supplementary Table 4. Upregulated genes (>5-fold) in Tuber magnatum ectomycorrhizae (ECM) compared to free-living mycelium (FLM). Upregulated genes in fruiting-body (FB) are also showed (see Supplementary Table S9). Clusters referred to Fig. 4A.
Cluster	Protein ID	Fold change FB vs FLM	FDR p-value	Fold change ECM vs FLM	FDR p-value	Tubma-FLM mean rpkm	Tubma-FB mean rpkm	Tubma-ECM mean rpkm	transcript Size	protein Size	Protein ID	kogid	kogdefline	kogClass	kogGroup	Cazyme family	Cazyme defline	Secretome	secreted Cazyme	secreted Protease	secreted Lipase	SSP
I	346319	7.5542	0.685079	3415.54	0.0320038	0.0227067	0.171531	77.5554	780	260	346319							x				x
I	281840	5.10142	0.105114	1478.59	0.0012876	0.461568	2.35465	682.47	1641	536	281840
I	361488	2.86538	0.162575	523.772	0	1.08324	3.1039	567.371	990	330	361488							x
I	32047	7.98763	0.164881	80.0172	9.34e-08	0.170565	1.36241	13.6481	1071	357	32047
I	307776	3930.27	0.00536378	74.0946	0.0110724	0.0704527	276.898	5.22017	1140	299	307776	KOG0528	HMG-box transcription factor SOX5	Transcription	INFORMATION STORAGE AND PROCESSING
I	196742	0.493462	0.506753	67.0366	0.0144734	1.43072	0.706006	95.9107	1935	645	196742
I	283440	0.580945	0.833817	57.4453	0.00457646	0.29911	0.173767	17.1825	741	247	283440
I	342796	1.28956	0.791854	33.1478	0.000991886	1.20706	1.55658	40.0114	1011	337	342796	KOG0504	FOG: Ankyrin repeat	General function prediction only	POORLY CHARACTERIZED
I	355344	1.04974	0.958895	25.4212	0	13.0026	13.6493	330.541	4929	1643	355344	KOG0613	Projectin/twitchin and related proteins	Cytoskeleton	CELLULAR PROCESSES AND SIGNALING
I	275641	21.7942	0.055275	23.6268	0	1.25829	27.4235	29.7295	1194	280	275641
I	324621	10.351	0.0555748	23.1951	0.0028648	25.047	259.263	580.968	1005	155	324621
I	340603	12.1739	0.0331055	15.9713	0.0321467	0.487793	5.93836	7.79071	1683	561	340603	KOG2992	Nucleolar GTPase/ATPase p130	Nuclear structure	CELLULAR PROCESSES AND SIGNALING
I	367268	0.141221	5.29e-06	9.56007	6.6e-07	12.6805	1.79075	121.227	1122	274	367268
I	340680	4.46468	0.0298224	9.41409	4.79e-14	2.83629	12.6631	26.7011	477	159	340680
I	353666	3.84836	0.00358486	8.19958	0.0180385	4.15733	15.9989	34.0883	1785	595	353666
I	276900	2.27678	0.451671	7.45903	0.00296423	0.677509	1.54254	5.05356	3984	1328	276900
I	341901	0.6086	0.805401	6.92668	0.0251361	0.443633	0.269995	3.07291	891	297	341901	KOG1721	FOG: Zn-finger	General function prediction only	POORLY CHARACTERIZED
I	348969	0.904862	0.954577	6.28468	0.0349894	0.46845	0.423883	2.94406	891	297	348969	KOG1721	FOG: Zn-finger	General function prediction only	POORLY CHARACTERIZED
I	356486	1.23488	0.893289	6.28192	0.00709456	0.710687	0.877613	4.46448	1631	488	356486	KOG0733	Nuclear AAA ATPase (VCP subfamily)	Posttranslational modification, protein turnover, chaperones	CELLULAR PROCESSES AND SIGNALING
I	364669	4.83679	0.152378	6.27329	0.000263014	46.0641	222.802	288.973	861	287	364669	KOG3915	Transcription regulator dachshund, contains SKI/SNO domain	Transcription	INFORMATION STORAGE AND PROCESSING
I	345321	1.87643	0.39314	6.2461	0	7.21343	13.5355	45.0558	1290	430	345321	KOG3528	FOG: PDZ domain	Function unknown	POORLY CHARACTERIZED
I	345317	1.81492	0.441243	5.83857	0	7.36396	13.365	42.995	1290	430	345317	KOG3528	FOG: PDZ domain	Function unknown	POORLY CHARACTERIZED
I	276080	12.4713	0.0198521	5.61848	0.0214828	10.2608	127.966	57.6503	1729	490	276080	KOG3599	Ca2+-modulated nonselective cation channel polycystin	Inorganic ion transport and metabolism	METABOLISM
I	365485	0.203322	0.0145732	5.49022	2.07e-11	4.7266	0.96102	25.9501	918	306	365485
I	366273	10.3187	0.0749733	5.28809	0.0284596	1.19468	12.3276	6.31757	1168	292	366273
II	276563	446.121	0.00057439	4805.85	0	0.0141009	6.29073	67.7671	1276	325	276563
II	357789	2.92316	0.627628	1347.84	0	0.157255	0.459683	211.955	1185	395	357789
II	340461	1.1033	0.947209	869.443	1.15e-08	1.04866	1.15699	911.754	1155	385	340461
II	340723	0.63425	0.785933	625.843	0	0.661564	0.419597	414.035	615	205	340723
II	357791	0.686413	0.828401	575.914	0	0.551717	0.378706	317.741	1908	636	357791
II	286925	2.34599	0.0560139	197.565	1.51e-07	2.92509	6.86223	577.896	2540	820	286925	KOG4157	beta-1,6-N-acetylglucosaminyltransferase, contains WSC domain	Carbohydrate transport and metabolism	METABOLISM
II	351144	45.7538	0.0892841	158.598	1.58e-05	2.49355	114.09	395.473	351	117	351144
II	360616	6.19861	0.456017	129.854	8.54e-08	0.0847101	0.525085	10.9999	1509	503	360616
II	287508	2.99451	0.376115	104.673	0	0.438719	1.31375	45.9221	1068	356	287508	KOG1238	Glucose dehydrogenase/choline dehydrogenase/mandelonitrile lyase (GMC oxidoreductase family)	General function prediction only	POORLY CHARACTERIZED	AA3+AF8-2	GMC oxidoreductase	x	x
II	292159	8.36158	0.0900831	81.9689	1.57e-14	0.948563	7.93148	77.7526	1442	322	292159
II	350799	8.44113	0.11981	76.8966	0.00200827	0.745332	6.29145	57.3135	2004	668	350799
II	359724	0.670082	0.200656	70.8993	9e-05	37.2857	24.9845	2643.53	2276	706	359724	KOG1950	Glycosyl transferase, family 8 - glycogenin	Carbohydrate transport and metabolism	METABOLISM	GT8	Glycosyltransferase Family 8 protein
II	278905	3.20448	0.332402	57.6313	1.71e-09	0.41453	1.32835	23.8899	1090	335	278905	KOG1208	Dehydrogenases with different specificities (related to short-chain alcohol dehydrogenases)	Secondary metabolites biosynthesis, transport and catabolism	METABOLISM
II	288142	0.548567	0.490604	57.2906	0	2.03872	1.11838	116.8	1890	630	288142
II	342524	2.78836	0.0811317	54.2792	1.43e-08	7.24464	20.2007	393.233	360	120	342524							x				x
II	346694	1.13746	0.965073	44.1716	1.59e-07	0.3559	0.404821	15.7207	678	226	346694
II	352543	0.31912	0.411699	41.7085	0.00307027	1.0219	0.326109	42.622	1956	652	352543
II	360962	0.720971	0.476935	41.5494	1.04e-05	5.87147	4.23316	243.956	991	276	360962
II	298817	0.599659	0.366331	41.2795	3.68e-07	4.00321	2.40056	165.25	1500	335	298817	KOG0159	Cytochrome P450 CYP11/CYP12/CYP24/CYP27 subfamilies	Secondary metabolites biosynthesis, transport and catabolism	METABOLISM
II	311253	1.36971	0.294791	35.2264	0	12.8427	17.5909	452.403	2065	525	311253	KOG1181	FOG: Low-complexity	Function unknown	POORLY CHARACTERIZED
II	367082	20.2851	2.67e-06	34.0429	4.84e-05	3.30226	66.9867	112.419	1162	289	367082
II	357976	2.32523	0.0119454	32.8315	0	7.96286	18.5155	261.433	1135	338	357976
II	345454	1.1432	0.937625	32.3948	0	0.810585	0.92666	26.2588	927	309	345454	KOG0161	Myosin class II heavy chain	Cytoskeleton	CELLULAR PROCESSES AND SIGNALING
II	273735	4.86635	0.000119558	31.438	2.9e-08	23.9088	116.349	751.644	1098	300	273735
II	306482	1.30809	0.671797	31.1208	8.38e-10	59.0693	77.2681	1838.28	959	194	306482
II	361250	4.80736	0.0115449	30.4727	1.11e-11	2.16731	10.419	66.0439	3971	1205	361250
II	359316	2.51874	0.410917	30.3528	0.0486236	0.586056	1.47612	17.7884	934	266	359316
II	188271	0.520669	0.605639	29.4831	0.0101178	1.04475	0.543971	30.8025	1014	338	188271
II	345455	1.16239	0.940362	29.0157	9.62e-15	0.811281	0.943028	23.5399	927	309	345455	KOG0161	Myosin class II heavy chain	Cytoskeleton	CELLULAR PROCESSES AND SIGNALING
II	362328	2.97932	0.240614	26.9234	3.02e-06	2.11293	6.2951	56.8873	1206	349	362328
II	158997	1.24127	0.803016	26.6431	0.00315878	2.20814	2.74088	58.8316	1119	373	158997	KOG1840	Kinesin light chain	Cytoskeleton	CELLULAR PROCESSES AND SIGNALING
II	221587	0.738926	0.733102	26.23	0.00197358	2.13684	1.57897	56.0492	789	263	221587					GH24	Glycoside Hydrolase Family 24 protein	x	x
II	367289	25.8971	0.000681	25.9685	0.000331987	19.8545	514.175	515.593	994	298	367289
II	340842	0.257751	0.00596212	25.2884	3.84e-08	9.99047	2.57505	252.643	591	197	340842							x				x
II	287293	32.1105	2.17e-13	24.8726	0	5.02365	161.312	124.951	735	236	287293					GH25	Glycoside Hydrolase Family 25 protein	x	x
II	365876	0.343457	0.0730972	23.5968	2.39e-06	4.47234	1.53606	105.533	480	160	365876
II	365750	0.333041	0.171143	16.8763	0.0375765	2.64039	0.87936	44.5601	1143	299	365750	KOG1721	FOG: Zn-finger	General function prediction only	POORLY CHARACTERIZED
II	357316	0.442947	0.133479	16.8658	1.41e-08	8.98519	3.97996	151.543	1695	565	357316	KOG0946	ER-Golgi vesicle-tethering protein p115	Intracellular trafficking, secretion, and vesicular transport	CELLULAR PROCESSES AND SIGNALING
II	360078	2.33557	0.0523231	16.6716	0	7.04294	16.4493	117.417	1502	493	360078
II	272824	1.40986	0.243774	16.0467	0.00323858	9.45737	13.3335	151.76	1999	643	272824	KOG2992	Nucleolar GTPase/ATPase p130	Nuclear structure	CELLULAR PROCESSES AND SIGNALING
II	357023	1.54444	0.549111	15.9356	0.011663	57.5384	88.8647	916.911	1284	239	357023
II	363451	3.1603	0.141933	15.2498	0.00637273	4.00178	12.6468	61.0261	969	313	363451	KOG0072	GTP-binding ADP-ribosylation factor-like protein ARL1	Intracellular trafficking, secretion, and vesicular transport	CELLULAR PROCESSES AND SIGNALING
II	347487	0.191985	0.0459281	15.0728	7.24e-07	3.1876	0.611971	48.0462	987	329	347487	KOG2142	Molybdenum cofactor sulfurase	Coenzyme transport and metabolism	METABOLISM
II	362327	1.76893	0.0777116	14.5762	6.08e-13	6.69501	11.843	97.5881	1403	402	362327
II	361948	1.76955	0.69982	12.8532	0.000421402	0.470664	0.832862	6.04953	1634	528	361948	KOG0161	Myosin class II heavy chain	Cytoskeleton	CELLULAR PROCESSES AND SIGNALING
II	284765	0.523707	0.476594	12.3629	0.00135705	1.83806	0.962607	22.7238	1014	338	284765							x
II	21895	1.30097	0.736627	12.0791	6.83e-05	2.29075	2.98021	27.6702	1935	645	21895	KOG2146	Splicing coactivator SRm160/300, subunit SRm160 (contains PWI domain)	General function prediction only	POORLY CHARACTERIZED
II	358447	0.333752	3.17e-11	12.0672	5.82e-09	48.3266	16.1291	583.168	1260	340	358447	KOG1198	Zinc-binding oxidoreductase	General function prediction only	POORLY CHARACTERIZED
II	176264	0.937381	0.977628	11.0561	0.00122702	0.770568	0.722315	8.51946	3876	1292	176264
II	218762	0.685761	0.865807	10.2094	0.00459081	0.404448	0.277354	4.12917	714	238	218762
II	312317	5.15097	0.419304	9.3494	0	43.0017	221.5	402.04	1253	313	312317
II	362329	2.9078	0.0764409	9.10778	0.00425011	1.55778	4.52973	14.188	1282	262	362329
II	340195	2.18978	0.209538	8.46366	0.00466089	3.06287	6.70699	25.9231	3348	1116	340195	KOG0870	DNA polymerase epsilon, subunit D	Transcription	INFORMATION STORAGE AND PROCESSING
II	172808	0.148954	4.54e-05	8.17161	0	10.0653	1.49928	82.25	1629	543	172808	KOG1307	K+-dependent Ca2+/Na+ exchanger NCKX1 and related proteins	Inorganic ion transport and metabolism	METABOLISM
II	356887	0.612649	0.331361	8.14687	5.37e-14	4.89166	2.99687	39.8517	1755	585	356887	KOG2806	Chitinase	Carbohydrate transport and metabolism	METABOLISM
II	357521	1.14466	0.846268	8.1266	2.15e-13	4.24522	4.85933	34.4992	791	211	357521
II	329695	1.81223	0.262027	8.12168	0.00231093	8.36795	15.1646	67.9618	697	180	329695							x				x
II	362106	3.5391	0.305462	8.00446	9.14e-10	2.35796	8.34506	18.8742	2084	646	362106
II	355230	0.198661	1.09e-06	7.95901	0.00101748	17.4019	3.45708	138.502	2190	614	355230
II	341990	7.51798	0.0338662	7.41138	0.0332992	1.51457	11.3865	11.225	609	203	341990
II	364460	1.29846	0.817646	7.34528	0	5.26697	6.83894	38.6874	466	123	364460							x				x
II	276839	3.02374	0.0644719	7.08636	2.66e-13	12.0349	36.3903	85.2834	1725	421	276839	KOG0615	Serine/threonine protein kinase Chk2 and related proteins	Cell cycle control, cell division, chromosome partitioning	METABOLISM
II	216691	2.38907	0.209706	7.07507	0.00057529	36.3619	86.871	257.263	2241	747	216691
II	156860	4.17142	2e-07	6.73801	7.24e-10	5.11936	21.355	34.4943	723	241	156860
II	359594	0.431176	0.00626358	6.49213	0.00157447	19.1243	8.24596	124.158	2252	730	359594	KOG1187	Serine/threonine protein kinase	Signal transduction mechanisms	CELLULAR PROCESSES AND SIGNALING
II	278896	1.4881	0.266632	6.11605	9.71e-05	6.61408	9.84243	40.4521	1140	290	278896
II	292732	1.0843	0.962826	5.85934	0.0045265	18.7579	20.3392	109.909	1179	304	292732
II	180029	0.245485	7.43e-11	5.78443	2.77e-12	36.9045	9.0595	213.472	2052	684	180029	KOG2510	SWI-SNF chromatin-remodeling complex protein	Chromatin structure and dynamics	INFORMATION STORAGE AND PROCESSING
II	153644	0.409556	0.0791722	5.75524	0.0208462	5.86026	2.40011	33.7272	1020	340	153644
II	355972	0.78429	0.32135	5.67731	0	38.8802	30.4934	220.735	1200	400	355972
II	349609	0.416246	0.00689028	5.58503	4.57e-09	49.2301	20.4918	274.951	3660	1220	349609	KOG4297	C-type lectin	Signal transduction mechanisms	CELLULAR PROCESSES AND SIGNALING
II	350422	0.624181	0.593109	5.57863	2.14e-05	1.9467	1.2151	10.8599	1173	391	350422	KOG0041	Predicted Ca2+-binding protein, EF-Hand protein superfamily	General function prediction only	POORLY CHARACTERIZED
II	361856	2.72633	0.105272	5.55805	0	6.89086	18.7868	38.2998	1815	601	361856	KOG1721	FOG: Zn-finger	General function prediction only	POORLY CHARACTERIZED
II	282205	0.383266	0.00255857	5.54476	0	13.1615	5.04434	72.9771	1026	342	282205
II	308166	1.06602	0.953926	5.20727	0	151.782	161.802	790.371	664	176	308166	KOG1187	Serine/threonine protein kinase	Signal transduction mechanisms	CELLULAR PROCESSES AND SIGNALING
II	286555	0.563999	0.235846	5.07552	2.01e-11	5.29757	2.98782	26.8879	1689	372	286555	KOG0069	Glyoxylate/hydroxypyruvate reductase (D-isomer-specific 2-hydroxy acid dehydrogenase superfamily)	Energy production and conversion	METABOLISM
II	286104	6.46124	0.0758266	5.00528	5.03e-06	172.71	1115.92	864.465	912	196	286104	KOG0856	Predicted pilin-like transcription factor	Posttranslational modification, protein turnover, chaperones	CELLULAR PROCESSES AND SIGNALING
III	352778	100.217	0.154676	1177.28	0.00409165	0.0495188	4.96262	58.2974	1890	630	352778
III	283300	5.2153	0.160205	705.024	6.45e-13	0.309543	1.61436	218.235	1773	591	283300	KOG0504	FOG: Ankyrin repeat	General function prediction only	POORLY CHARACTERIZED
III	361503	4.20954	0.0390438	538.053	7.61e-11	1.42516	5.99925	766.81	1446	427	361503
III	362338	25.6856	0.209432	348.296	0.0138467	0.0546569	1.4039	19.0368	679	157	362338
III	343873	12.9918	0.146316	334.113	9.17e-05	0.0954555	1.24014	31.893	1851	617	343873	KOG3671	Actin regulatory protein (Wiskott-Aldrich syndrome protein)	Cytoskeleton	CELLULAR PROCESSES AND SIGNALING
III	364456	6.58823	0.275621	294.737	0	0.151014	0.994912	44.5092	3423	1113	364456	KOG1840	Kinesin light chain	Cytoskeleton	CELLULAR PROCESSES AND SIGNALING
III	211607	1.25761	0.864213	93.4934	1.28e-08	1.04551	1.31484	97.748	615	205	211607
III	348102	9.98686	0.329172	93.4234	1.46e-06	0.676089	6.75201	63.1625	663	221	348102
III	343872	6.53917	0.195879	78.4376	0.00918566	0.203071	1.32792	15.9284	1428	476	343872
III	342010	1.44086	0.825977	74.6582	2.32e-12	0.521546	0.751474	38.9377	750	250	342010
III	362136	1.94783	0.105662	64.238	0.000216916	5.98665	11.661	384.57	1245	332	362136
III	290617	0.232527	9.11e-14	57.6528	1.08e-07	44.4616	10.3385	2563.33	698	213	290617
III	363678	1.56711	0.562446	35.8942	4.04e-12	1.65524	2.59395	59.4137	567	189	363678
III	280259	0.835687	0.511141	31.5377	0	16.6902	13.9477	526.37	2228	644	280259
III	281805	0.0833351	0.0127326	26.9456	2.68e-05	3.36456	0.280386	90.6599	2122	651	281805
III	341038	0.371068	4.39e-09	16.6798	0	56.3399	20.906	939.737	2388	796	341038
III	347490	2.97897	0.414509	12.9938	0.00135756	0.381267	1.13578	4.9541	954	318	347490	KOG1216	von Willebrand factor and related coagulation proteins	Extracellular structures	CELLULAR PROCESSES AND SIGNALING
III	343502	4.34381	0.0598982	11.9222	0.0141077	10.8692	47.2136	129.584	609	203	343502
III	360636	0.213447	1.15e-16	10.3139	0	71.9328	15.3538	741.911	1978	658	360636
III	345212	0.228825	1.58e-05	9.97576	8.81e-08	17.8735	4.08991	178.302	2022	674	345212
III	365719	0.121358	5.84e-10	9.60178	1.83e-06	20.301	2.4637	194.926	2136	712	365719
III	48508	0.739952	0.277967	9.26795	0.00011114	14.9379	11.0533	138.444	432	144	48508	KOG1721	FOG: Zn-finger	General function prediction only	POORLY CHARACTERIZED
III	366248	3.41269	0.305156	9.10396	0.00800278	0.425863	1.45334	3.87704	891	280	366248
III	362120	6.87255	0.0866877	8.51479	1.07e-07	1.74454	11.9895	14.8544	421	123	362120
III	200479	2.49672	0.232418	8.29495	1.38e-06	1.91776	4.78813	15.9078	891	297	200479	KOG2258	Glycerophosphoryl diester phosphodiesterase	Energy production and conversion	METABOLISM
III	315120	1.14692	0.835666	8.03159	6.5e-15	23.6868	27.167	190.243	2061	646	315120
III	363776	0.17566	0.00688758	7.93877	0	5.21387	0.91587	41.3917	2978	944	363776	KOG1869	Splicing coactivator SRm160/300, subunit SRm300	RNA processing and modification	INFORMATION STORAGE AND PROCESSING
III	359329	2.37457	0.127254	7.44637	1.76e-06	30.0898	71.4503	224.06	1776	580	359329
III	346402	0.115073	2.05e-63	7.20624	0	471.745	54.2849	3399.51	2013	671	346402
III	358351	0.351133	0.0390018	6.71217	0	5.85261	2.05505	39.2837	1803	601	358351	KOG0504	FOG: Ankyrin repeat	General function prediction only	POORLY CHARACTERIZED
III	286224	0.469667	0.0262306	6.01753	0	14.2437	6.68978	85.7118	1696	552	286224	KOG1187	Serine/threonine protein kinase	Signal transduction mechanisms	CELLULAR PROCESSES AND SIGNALING
III	276621	0.512208	0.0357874	5.50101	3.35e-15	21.4606	10.9923	118.055	4158	1245	276621	KOG4674	Uncharacterized conserved coiled-coil protein	Function unknown	POORLY CHARACTERIZED
III	364364	1.89112	0.243371	5.40562	0	145.045	274.298	784.059	1266	302	364364	KOG1216	von Willebrand factor and related coagulation proteins	Extracellular structures	CELLULAR PROCESSES AND SIGNALING
III	361065	2.70146	0.0969543	5.27572	0.000195125	1.67067	4.51325	8.814	3028	885	361065	KOG1869	Splicing coactivator SRm160/300, subunit SRm300	RNA processing and modification	INFORMATION STORAGE AND PROCESSING
III	342429	0.50799	0.253568	5.04023	0.00947663	3.83752	1.94942	19.342	2673	891	342429	KOG4177	Ankyrin	Cell wall/membrane/envelope biogenesis	CELLULAR PROCESSES AND SIGNALING
IV	285692	88.3322	0.177888	5693.36	7.8e-10	0.0182496	1.61202	103.901	647	126	285692
IV	348306	19.8355	0.543135	1261.79	5.53e-11	0.0125718	0.249368	15.863	492	164	348306
IV	285691	34.4688	0.130313	988.47	0.000815486	0.0548334	1.89004	54.2012	384	128	285691
IV	341883	7.54809	0.12303	719.12	0.00029635	0.34034	2.56892	244.746	747	249	341883
IV	341495	32.1604	0.0253752	169.868	9.35e-12	0.487257	15.6704	82.7693	915	305	341495
IV	346976	11.5948	0.337278	148.421	9.01e-06	0.0523205	0.606644	7.76546	1101	367	346976
IV	364039	14.6319	0.0566811	103.436	0.0183844	0.276344	4.04344	28.5841	1028	324	364039	KOG0304	mRNA deadenylase subunit	RNA processing and modification	INFORMATION STORAGE AND PROCESSING
IV	346227	11.2345	0.366017	96.2243	0.0327767	0.0482752	0.542349	4.64525	849	283	346227
IV	222512	5.42069	0.247437	67.2888	0.00980334	0.226769	1.22924	15.259	645	215	222512	KOG4212	RNA-binding protein hnRNP-M	RNA processing and modification	INFORMATION STORAGE AND PROCESSING
IV	43916	1.60608	0.846268	60.3363	0.000948245	0.221253	0.355349	13.3496	255	85	43916
IV	161685	0.979724	0.961217	45.19	1.05e-08	5.66484	5.54998	255.994	336	112	161685
IV	363479	338.622	5.87e-05	37.1784	0.000104331	0.171049	57.921	6.35932	959	184	363479	KOG0049	Transcription factor, Myb superfamily	Transcription	INFORMATION STORAGE AND PROCESSING
IV	273684	1.1028	0.943363	32.2061	0.000769559	1.40247	1.54664	45.168	480	145	273684
IV	362769	3.191	0.259921	27.3889	4.47e-05	0.583536	1.86206	15.9824	588	184	362769	KOG1211	Amidases	Translation, ribosomal structure and biogenesis	INFORMATION STORAGE AND PROCESSING
IV	344450	0.173978	0.40024	27.0076	0.029092	0.640223	0.111385	17.2909	336	112	344450
IV	43413	2.05062	0.733102	25.4287	0.000278467	0.22632	0.464097	5.75504	474	158	43413	KOG1289	Amino acid transporters	Amino acid transport and metabolism	METABOLISM
IV	362449	3.35074	0.104349	17.4072	0.00345795	0.974536	3.26541	16.9639	892	185	362449	KOG2049	Translational repressor MPT5/PUF4 and related RNA-binding proteins (Puf superfamily)	Translation, ribosomal structure and biogenesis	INFORMATION STORAGE AND PROCESSING
IV	361355	3.45611	0.414408	16.6817	0.0499281	0.275544	0.952311	4.59655	2776	880	361355	KOG1840	Kinesin light chain	Cytoskeleton	CELLULAR PROCESSES AND SIGNALING
IV	341842	4.912	0.152078	15.4317	3.07e-06	6.31943	31.041	97.5195	1206	402	341842	KOG1995	Conserved Zn-finger protein	General function prediction only	POORLY CHARACTERIZED
IV	328779	1.85417	0.106417	12.9656	4.3e-05	25.7472	47.7397	333.828	652	133	328779	KOG4157	beta-1,6-N-acetylglucosaminyltransferase, contains WSC domain	Carbohydrate transport and metabolism	METABOLISM			x				x
IV	159753	7.46186	0.0154376	12.1907	0.0112174	2.1536	16.0698	26.2538	987	329	159753
IV	179698	0.247717	0.000361375	10.6968	0.0246383	10.9401	2.71004	117.024	369	123	179698	KOG3308	Uncharacterized protein of the uridine kinase family	Nucleotide transport and metabolism	METABOLISM
IV	288040	2.38471	0.0629454	10.6647	2.76e-14	2.79835	6.67325	29.8436	661	190	288040
IV	305199	1.95721	0.239726	10.3037	9.52e-05	2.63355	5.15441	27.1352	507	169	305199
IV	362965	1.30538	0.886033	10.0345	0.00666358	0.500718	0.653625	5.02445	804	268	362965							x				x
IV	338672	21.9959	1.27e-07	8.80573	0	32.1547	707.27	283.145	374	56	338672
IV	332823	4.31566	0.144773	8.62605	0.000282221	39.4178	170.114	340.02	891	297	332823
IV	362638	0.120978	0.00163596	7.49297	1.89e-11	5.77525	0.698677	43.2738	585	195	362638
IV	174992	0.387996	0.0283283	7.31016	4.49e-09	7.49553	2.90824	54.7936	4506	1502	174992	KOG0516	Dystonin, GAS (Growth-arrest-specific protein), and related proteins	Cytoskeleton	CELLULAR PROCESSES AND SIGNALING
IV	348490	2.24643	0.506621	7.14341	0.0193673	0.528602	1.18747	3.77602	483	161	348490
IV	314309	9.26015	0.0937018	6.28696	0.0489887	3.42815	31.7451	21.5526	567	91	314309
IV	309251	2.24191	0.294999	5.92598	3.23e-05	1.73802	3.89648	10.2995	1017	186	309251
IV	363210	8.51878	4.66e-05	5.91949	2.45e-05	1.76684	15.0513	10.4588	1119	236	363210	KOG0927	Predicted transporter (ABC superfamily)	General function prediction only	POORLY CHARACTERIZED
IV	333006	0.468291	0.315614	5.61258	3.68e-06	14.5661	6.82119	81.7537	506	61	333006
IV	366578	2.70729	0.071109	5.33367	0.000341257	1.89518	5.13078	10.1082	731	222	366578
IV	323695	3.34671	2.12e-05	5.23262	0.00414517	11.311	37.8547	59.1864	1067	347	323695
V	279135	4.71527	0.197479	17150.9	0	0.323747	1.52655	5552.57	509	103	279135							x				x
V	314147	4116.15	0	9920.93	6.86e-13	0.00584626	24.0641	58.0004	1058	164	314147							x				x
V	366472	10.9322	0.0507291	4422.72	9.59e-09	0.249437	2.72688	1103.19	1229	368	366472
V	276999	96.5186	0.000292367	3300.05	0	0.080841	7.80267	266.779	2717	834	276999	KOG0207	Cation transport ATPase	Inorganic ion transport and metabolism	METABOLISM
V	162016	89.5785	0.0323175	2404.78	0	0.03199	2.86562	76.9288	747	249	162016
V	356220	153.503	0.00029287	1042.3	0.00871582	0.089785	13.7823	93.5827	1399	364	356220
V	272820	13.2777	0.0367649	613.806	0	0.183808	2.44054	112.822	819	273	272820					CE12	Carbohydrate Esterase Family 12 protein	x	x
V	189582	7.80537	0.387165	581.861	6.27e-06	0.0731753	0.57116	42.5779	972	324	189582	KOG4157	beta-1,6-N-acetylglucosaminyltransferase, contains WSC domain	Carbohydrate transport and metabolism	METABOLISM
V	360486	4.95093	0.502413	495.025	0.0367284	0.0987943	0.489124	48.9056	1083	361	360486					GH28	Glycoside Hydrolase Family 28 protein	x	x
V	357989	2.098	0.695618	446.741	0.00119146	0.258347	0.542011	115.414	1407	469	357989	KOG2533	Permease of the major facilitator superfamily	Carbohydrate transport and metabolism	METABOLISM
V	284620	6.18504	0.33979	403.152	9.71e-05	1.31244	8.11749	529.112	749	199	284620
V	195976	0.947606	0.986471	361.379	0.000861019	0.335062	0.317507	121.084	1167	389	195976							x
V	363344	5.35866	0.0509339	280.236	0	0.55895	2.99522	156.638	1117	298	363344	KOG1381	Para-hydroxybenzoate-polyprenyl transferase	Coenzyme transport and metabolism	METABOLISM
V	355752	5.97177	0.051983	256.559	0	0.634883	3.79138	162.885	1005	335	355752
V	345521	2.58688	0.772137	223.393	0.0430528	0.0898949	0.232548	20.0819	1062	354	345521
V	276102	1.11696	0.920009	200.858	0	1.52473	1.70307	306.254	1443	429	276102	KOG2533	Permease of the major facilitator superfamily	Carbohydrate transport and metabolism	METABOLISM
V	283294	7.36063	0.283399	190.67	5.4e-05	0.116276	0.855866	22.1704	558	186	283294							x				x
V	363982	3.75822	0.119546	181.367	4.28e-06	1.18562	4.45582	215.033	1508	458	363982
V	286696	4.01551	0.517336	168.25	0.0163814	0.135496	0.544085	22.7971	744	248	286696					GH12	Glycoside Hydrolase Family 12 protein	x	x
V	311177	32.5543	0.0693482	162.381	0.000694013	5.26289	171.33	854.595	1354	306	311177	KOG4157	beta-1,6-N-acetylglucosaminyltransferase, contains WSC domain	Carbohydrate transport and metabolism	METABOLISM
V	355878	4.68008	0.162462	144.034	4.63e-06	0.40462	1.89365	58.2791	1500	500	355878	KOG2533	Permease of the major facilitator superfamily	Carbohydrate transport and metabolism	METABOLISM
V	355416	4.10857	0.0918298	141.268	0	0.681016	2.798	96.2061	1906	500	355416	KOG0158	Cytochrome P450 CYP3/CYP5/CYP6/CYP9 subfamilies	Secondary metabolites biosynthesis, transport and catabolism	METABOLISM
V	318965	1110.11	2.11e-05	137.336	2.67e-07	0.522834	580.402	71.8038	1044	291	318965	KOG0800	FOG: Predicted E3 ubiquitin ligase	Posttranslational modification, protein turnover, chaperones	CELLULAR PROCESSES AND SIGNALING
V	283333	1.98101	0.392053	135.33	0	2.92174	5.78802	395.401	754	173	283333
V	283293	2.80757	0.0461147	127.085	1.66e-05	3.10469	8.71663	394.558	2016	591	283293	KOG3575	FOG: Hormone receptors	Signal transduction mechanisms	CELLULAR PROCESSES AND SIGNALING
V	289241	1.22991	0.892037	113.808	0	0.898596	1.10519	102.267	4760	1436	289241	KOG0519	Sensory transduction histidine kinase	Signal transduction mechanisms	CELLULAR PROCESSES AND SIGNALING
V	286369	0.297258	0.00281334	98.1428	0.000472069	10.2869	3.05786	1009.58	1869	623	286369
V	48325	1.53325	0.862558	89.6511	1.62e-05	0.312036	0.47843	27.9743	531	177	48325
V	211494	13.8134	0.532743	84.4284	0.0497264	0.020623	0.284873	1.74117	4335	1445	211494
V	192638	2.64248	0.356049	79.6194	0.0132565	0.59856	1.58168	47.657	2379	793	192638	KOG2614	Kynurenine 3-monooxygenase and related flavoprotein monooxygenases	General function prediction only	POORLY CHARACTERIZED
V	356228	45.7584	0.0296832	78.0547	0.00299476	0.378331	17.3119	29.5305	1230	363	356228
V	363475	25.2401	0.0137312	76.8908	1.45e-06	0.117908	2.976	9.06602	6348	2116	363475	KOG1202	Animal-type fatty acid synthase and related proteins	Lipid transport and metabolism	METABOLISM
V	358974	13.5436	0.301346	76.3515	0.00263473	0.0498525	0.675182	3.80631	3370	1046	358974	KOG4441	Proteins containing BTB/POZ and Kelch domains, involved in regulatory/signal transduction processes	General function prediction only	POORLY CHARACTERIZED
V	346231	12.4225	0.231021	73.9553	0.000248282	0.0736455	0.914859	5.44648	4431	1477	346231
V	276591	5.49557	0.447749	68.1038	0.0145244	0.101023	0.555182	6.88008	1668	457	276591	KOG1382	Multiple inositol polyphosphate phosphatase	General function prediction only	POORLY CHARACTERIZED			x
V	226848	0.696795	0.724552	65.4898	0	1.44639	1.00784	94.724	1812	604	226848	KOG0228	Beta-fructofuranosidase (invertase)	Carbohydrate transport and metabolism	METABOLISM	GH32	Glycoside Hydrolase Family 32 protein	x	x
V	280670	2.97834	0.319145	54.665	1.3e-10	1.67341	4.984	91.4771	1954	610	280670	KOG1238	Glucose dehydrogenase/choline dehydrogenase/mandelonitrile lyase (GMC oxidoreductase family)	General function prediction only	POORLY CHARACTERIZED	AA3+AF8-2	GMC oxidoreductase
V	292839	1.02433	1	50.8647	0	2.15592	2.20837	109.66	1254	348	292839	KOG4742	Predicted chitinase	General function prediction only	POORLY CHARACTERIZED	CBM18+AC0-CE4	Carbohydrate+AC0-Binding Module Family 18 / Carbohydrate Esterase Family 4 protein	x	x
V	298775	10.9296	0.275837	50.2665	0.00301015	0.0749216	0.818866	3.76605	3156	1043	298775	KOG1072	FOG: Kelch repeat	General function prediction only	POORLY CHARACTERIZED
V	309615	53.6941	4.96e-06	49.7716	0.00445711	1.65822	89.0367	82.5324	969	249	309615
V	366264	4.50954	0.373764	49.7209	2.88e-08	1.17186	5.28454	58.2659	4589	1522	366264	KOG1869	Splicing coactivator SRm160/300, subunit SRm300	RNA processing and modification	INFORMATION STORAGE AND PROCESSING
V	356723	0.481779	0.195888	48.4524	0	5.50728	2.65329	266.841	1143	283	356723	KOG3699	Cytoskeletal protein Adducin	Cytoskeleton	CELLULAR PROCESSES AND SIGNALING
V	360412	8.3366	0.00092339	48.128	2.38e-05	1.47876	12.3278	71.1698	1711	500	360412
V	278820	0.474644	0.0698394	46.3894	0	7.74776	3.67742	359.413	1083	298	278820	KOG1269	SAM-dependent methyltransferases	General function prediction only	POORLY CHARACTERIZED
V	284569	0.517768	0.619033	45.3456	0.00223846	0.998812	0.517153	45.2917	1904	492	284569
V	273812	0.338461	0.383785	43.2523	5.95e-05	1.19288	0.403743	51.5949	372	124	273812	KOG0509	Ankyrin repeat and DHHC-type Zn-finger domain containing proteins	General function prediction only	POORLY CHARACTERIZED
V	83236	0.401177	0.306857	42.7133	0	2.06849	0.829832	88.3522	282	94	83236							x				x
V	209562	12.452	0.154534	42.0582	1.01e-06	0.230302	2.86772	9.68608	1341	447	209562	KOG0254	Predicted transporter (major facilitator superfamily)	General function prediction only	POORLY CHARACTERIZED
V	196093	0.715637	0.434905	41.0419	3.35e-15	14.8228	10.6078	608.357	1524	508	196093	KOG2668	Flotillins	Intracellular trafficking, secretion, and vesicular transport	CELLULAR PROCESSES AND SIGNALING
V	281842	0.586619	0.392317	40.911	0.000443997	6.01983	3.53134	246.277	1749	583	281842
V	298776	6.60452	0.104835	38.4109	0.000540618	0.294949	1.948	11.3293	3132	1040	298776	KOG4441	Proteins containing BTB/POZ and Kelch domains, involved in regulatory/signal transduction processes	General function prediction only	POORLY CHARACTERIZED
V	356992	3.00443	0.464896	38.1832	0.00626255	0.300445	0.902668	11.472	682	191	356992
V	302065	2.92912	0.233456	34.1635	0	9.24059	27.0667	315.691	1913	476	302065	KOG2614	Kynurenine 3-monooxygenase and related flavoprotein monooxygenases	General function prediction only	POORLY CHARACTERIZED
V	351920	1.33742	0.751708	33.7806	2.99e-05	1.56749	2.09639	52.9509	1308	436	351920	KOG1450	Predicted Rho GTPase-activating protein	Signal transduction mechanisms	CELLULAR PROCESSES AND SIGNALING
V	298362	1.27042	0.598785	29.2172	2.52e-07	5.54594	7.04568	162.037	1055	204	298362
V	343911	0.912138	0.87101	27.9924	0	5.05648	4.6122	141.543	1443	481	343911	KOG3178	Hydroxyindole-O-methyltransferase and related SAM-dependent methyltransferases	General function prediction only	POORLY CHARACTERIZED
V	22977	0.143018	0.0241661	26.4719	0.0143944	3.40853	0.48748	90.2301	813	271	22977
V	356662	2.31605	0.336609	26.3173	5.07e-05	0.91855	2.12741	24.1737	2799	900	356662	KOG0260	RNA polymerase II, large subunit	Transcription	INFORMATION STORAGE AND PROCESSING
V	276099	1.81188	0.507091	26.2662	0.00434078	2.855	5.17292	74.99	1560	511	276099	KOG2533	Permease of the major facilitator superfamily	Carbohydrate transport and metabolism	METABOLISM
V	356729	2.1092	0.797102	26.1719	0.00831745	0.122701	0.2588	3.21131	2349	783	356729					GH3	Glycoside Hydrolase Family 3 protein
V	363446	0.93993	0.924045	25.9994	0	4.8346	4.54419	125.697	1473	491	363446							x
V	292565	2.11215	0.0695716	25.7314	0	4.4899	9.48335	115.532	1570	332	292565	KOG2084	Predicted histone tail methylase containing SET domain	Chromatin structure and dynamics	INFORMATION STORAGE AND PROCESSING
V	191788	0.255779	0.449964	24.6453	0.0053395	0.691506	0.176872	17.0424	1323	441	191788	KOG2614	Kynurenine 3-monooxygenase and related flavoprotein monooxygenases	General function prediction only	POORLY CHARACTERIZED
V	221313	0.365847	0.00242341	22.9499	3.65e-09	12.6093	4.61306	289.382	621	207	221313
V	285137	0.523786	0.386823	22.5149	0	10.1483	5.31554	228.488	1589	484	285137
V	284350	0.244452	7.14e-06	22.2132	0.000907901	25.5813	6.25341	568.242	1395	440	284350	KOG2614	Kynurenine 3-monooxygenase and related flavoprotein monooxygenases	General function prediction only	POORLY CHARACTERIZED
V	141117	358.55	0.00161962	22.17	1.1e-13	1.23729	443.63	27.4307	447	149	141117	KOG0504	FOG: Ankyrin repeat	General function prediction only	POORLY CHARACTERIZED
V	275344	0.636959	0.67305	21.9432	0.000438403	1.38034	0.879219	30.2891	1203	401	275344
V	352020	119.412	0.00927435	21.7132	1.53e-07	2.37113	283.141	51.4849	1530	510	352020	KOG1399	Flavin-containing monooxygenase	Secondary metabolites biosynthesis, transport and catabolism	METABOLISM
V	297684	7.65981	3.34e-08	20.7861	3.6e-05	2.33167	17.8602	48.4663	2449	673	297684
V	350228	11.5276	0.0973341	20.3278	1.23e-05	59.1414	681.758	1202.22	444	148	350228	KOG4102	Uncharacterized conserved protein	Function unknown	POORLY CHARACTERIZED
V	297700	3.96224	0.112488	19.5884	1.93e-07	2.54721	10.0927	49.8958	1140	117	297700
V	309144	9.22777	0.00388171	17.4319	2.07e-09	92.3583	852.262	1609.98	1343	170	309144
V	357393	0.330366	0.0330864	16.6242	9.51e-07	11.7086	3.86812	194.646	2748	916	357393	KOG0672	Halotolerance protein HAL3 (contains flavoprotein domain)	Inorganic ion transport and metabolism	METABOLISM			x
V	359546	2.02287	0.423312	16.5046	1.42e-13	2.45476	4.96566	40.5148	798	246	359546	KOG0725	Reductases with broad range of substrate specificities	General function prediction only	POORLY CHARACTERIZED
V	289976	2.66542	0.207335	16.4888	0.00252292	1.03188	2.75039	17.0145	1759	511	289976
V	157684	1.98298	0.423312	16.418	3.74e-11	1.13312	2.24694	18.6035	780	260	157684
V	362143	4.30832	0.126562	15.7036	0.000558948	0.586984	2.52891	9.21776	958	266	362143
V	357477	8.07226	0.125305	15.5615	0.00637273	15.2844	123.38	237.849	2556	852	357477	KOG0519	Sensory transduction histidine kinase	Signal transduction mechanisms	CELLULAR PROCESSES AND SIGNALING
V	341514	7.3123	3.27e-05	15.3432	0.022548	1.37345	10.0431	21.0731	930	310	341514	KOG1318	Helix loop helix transcription factor EB	Transcription	INFORMATION STORAGE AND PROCESSING
V	343674	1.40644	0.772548	15.2714	0.000201825	0.937216	1.31814	14.3126	1368	456	343674	KOG1869	Splicing coactivator SRm160/300, subunit SRm300	RNA processing and modification	INFORMATION STORAGE AND PROCESSING
V	361115	0.553619	0.567204	14.6337	0.000748114	1.58345	0.876627	23.1717	1715	536	361115	KOG1515	Arylacetamide deacetylase	Defense mechanisms	CELLULAR PROCESSES AND SIGNALING
V	289329	2.89802	0.0567982	14.5638	0	12.1568	35.2305	177.048	1380	440	289329
V	364909	1.41008	0.513027	14.4386	0	12.9025	18.1936	186.294	1268	377	364909	KOG3847	Phospholipase A2 (platelet-activating factor acetylhydrolase in humans)	Lipid transport and metabolism	METABOLISM
V	182865	4.7521	0.440741	13.1946	0	20.1312	95.6656	265.623	1830	610	182865
V	223317	5.64763	0.181177	12.9831	0.00111692	9.74236	55.0212	126.486	3690	1230	223317	KOG1216	von Willebrand factor and related coagulation proteins	Extracellular structures	CELLULAR PROCESSES AND SIGNALING
V	357349	3.50215	0.123252	12.9364	0	2.14269	7.50402	27.7188	771	257	357349
V	365362	3.02002	0.437699	12.8996	1.63e-12	7.76098	23.4383	100.114	742	167	365362
V	162217	0.634807	0.653776	12.8651	0.0141908	1.51537	0.961965	19.4954	1302	434	162217					GH28	Glycoside Hydrolase Family 28 protein
V	332699	28.8953	0.0339844	12.5885	2.58e-07	8.70929	251.657	109.636	1317	326	332699
V	365278	0.446817	0.179325	12.4152	3.34e-06	4.0046	1.78933	49.7179	1423	409	365278
V	363634	4.46824	8.26e-05	12.1444	0.0105026	4.25246	19.001	51.6437	3255	1085	363634	KOG1015	Transcription regulator XNP/ATRX, DEAD-box superfamily	Transcription	INFORMATION STORAGE AND PROCESSING
V	358776	2.15126	0.0154136	11.7665	9.35e-07	85.7274	184.422	1008.71	1389	463	358776
V	287833	10.1654	0.211598	11.7607	0.00115123	0.48151	4.89476	5.66289	559	184	287833							x				x
V	365196	1.66663	0.561579	11.7448	0.000136801	2.12832	3.54713	24.9966	625	150	365196	KOG4111	Translocase of outer mitochondrial membrane complex, subunit TOM22	Intracellular trafficking, secretion, and vesicular transport	CELLULAR PROCESSES AND SIGNALING
V	355876	4.69189	0.279747	11.7087	0.0046723	7.2785	34.1499	85.2217	1767	426	355876
V	350215	0.510143	0.0367033	10.8583	0.026713	29.3883	14.9923	319.107	567	189	350215	KOG1572	Predicted protein tyrosine phosphatase	Defense mechanisms	CELLULAR PROCESSES AND SIGNALING
V	357545	0.636973	0.115189	10.7633	1.67e-06	22.0938	14.0732	237.803	2161	705	357545	KOG1217	Fibrillins and related proteins containing Ca2+-binding EGF-like domains	Signal transduction mechanisms	CELLULAR PROCESSES AND SIGNALING			x
V	356666	0.348254	0.165369	10.6991	0.0128899	2.82759	0.98472	30.2526	1017	339	356666
V	349955	0.410932	0.00839485	10.5581	8.06e-05	11.6394	4.78298	122.89	1083	361	349955	KOG2565	Predicted hydrolases or acyltransferases (alpha/beta hydrolase superfamily)	General function prediction only	POORLY CHARACTERIZED
V	29849	0.406602	0.225912	10.5137	0	2.79919	1.13816	29.4297	219	73	29849
V	351184	0.219846	3.56e-13	10.259	0	43.9006	9.65137	450.376	2796	932	351184	KOG1601	GATA-4/5/6 transcription factors	Transcription	INFORMATION STORAGE AND PROCESSING
V	187059	0.463823	0.00302925	10.0639	0	25.4171	11.789	255.794	2583	861	187059	KOG1721	FOG: Zn-finger	General function prediction only	POORLY CHARACTERIZED
V	355782	0.680568	0.0416246	9.89022	0	29.3531	19.9768	290.308	2254	741	355782
V	365484	6.11839	0.0606058	9.70361	0.000212499	0.714385	4.37088	6.93212	3350	1058	365484	KOG3544	Collagens (type IV and type XIII), and related proteins	Extracellular structures	CELLULAR PROCESSES AND SIGNALING
V	359604	1.52771	0.4978	9.68223	5.17e-11	114.472	174.879	1108.34	1843	440	359604	KOG2412	Nuclear-export-signal (NES)-containing protein/polyadenylated-RNA export factor	RNA processing and modification	INFORMATION STORAGE AND PROCESSING
V	272821	6.23216	0.0793987	9.43114	8.39e-09	1.70428	10.6213	16.0733	2538	823	272821	KOG2992	Nucleolar GTPase/ATPase p130	Nuclear structure	CELLULAR PROCESSES AND SIGNALING
V	361313	0.913035	0.742933	9.27882	0.000676737	16.3851	14.9602	152.035	1961	536	361313
V	223022	3.33039	5.63e-08	9.05948	0	14.7283	49.051	133.431	1188	396	223022
V	273316	1.31255	0.463921	8.96682	1.72e-08	35.221	46.2294	315.821	2745	877	273316	KOG0825	PHD Zn-finger protein	General function prediction only	POORLY CHARACTERIZED
V	187232	2.82818	0.214197	8.79744	3.35e-15	4.43842	12.5527	39.0467	1788	596	187232	KOG1897	Damage-specific DNA binding complex, subunit DDB1	Replication, recombination and repair	INFORMATION STORAGE AND PROCESSING
V	156714	15.5576	1.01e-07	8.72288	0	60.7058	944.439	529.529	1134	378	156714	KOG1721	FOG: Zn-finger	General function prediction only	POORLY CHARACTERIZED
V	344781	1.02595	0.977544	8.39678	0.00129556	15.0204	15.4101	126.123	531	177	344781	KOG1216	von Willebrand factor and related coagulation proteins	Extracellular structures	CELLULAR PROCESSES AND SIGNALING
V	280470	1.55086	0.795097	8.33311	0.00705122	0.47829	0.741759	3.98564	762	254	280470
V	192824	0.305519	1.37e-05	8.21389	5.9e-14	25.5407	7.80317	209.789	2088	696	192824	KOG2510	SWI-SNF chromatin-remodeling complex protein	Chromatin structure and dynamics	INFORMATION STORAGE AND PROCESSING
V	344566	0.639657	0.00660701	8.18091	1.25e-07	50.1655	32.0887	410.4	2355	785	344566	KOG1815	Predicted E3 ubiquitin ligase	Posttranslational modification, protein turnover, chaperones	CELLULAR PROCESSES AND SIGNALING
V	274257	0.526972	0.00060152	8.17963	3.35e-15	31.4625	16.5798	257.351	4002	1205	274257	KOG0155	Transcription factor CA150	Transcription	INFORMATION STORAGE AND PROCESSING
V	344200	0.385364	0.0409955	8.16777	0	6.4717	2.49396	52.8594	1221	407	344200	KOG2294	Transcription factor of the Forkhead/HNF3 family	Transcription	INFORMATION STORAGE AND PROCESSING
V	360125	0.0565935	1.88e-05	8.13814	0	33.9249	1.91993	276.086	1018	268	360125					CE4	Carbohydrate Esterase Family 4 protein	x	x
V	356144	0.294992	1.39e-11	8.06769	0	85.6223	25.2579	690.775	2549	698	356144	KOG2510	SWI-SNF chromatin-remodeling complex protein	Chromatin structure and dynamics	INFORMATION STORAGE AND PROCESSING
V	48025	1.4639	0.742933	7.93899	0.0244272	0.868465	1.27134	6.89473	330	110	48025	KOG4177	Ankyrin	Cell wall/membrane/envelope biogenesis	CELLULAR PROCESSES AND SIGNALING
V	350735	0.143191	0.000363184	7.86033	0.0174216	7.73506	1.10759	60.8001	963	321	350735	KOG1502	Flavonol reductase/cinnamoyl-CoA reductase	Defense mechanisms	CELLULAR PROCESSES AND SIGNALING
V	353542	0.407889	0.000255042	7.76062	9.86e-14	191.977	78.3055	1489.86	1629	543	353542	KOG4674	Uncharacterized conserved coiled-coil protein	Function unknown	POORLY CHARACTERIZED			x
V	348916	0.133861	0.000227465	7.72258	0.0145994	8.04144	1.07643	62.1006	942	314	348916	KOG0118	FOG: RRM domain	General function prediction only	POORLY CHARACTERIZED
V	356701	2.23233	0.233456	7.5776	0.00680938	4.62685	10.3286	35.0604	2480	758	356701	KOG0045	Cytosolic Ca2+-dependent cysteine protease (calpain), large subunit (EF-Hand protein superfamily)	Posttranslational modification, protein turnover, chaperones	CELLULAR PROCESSES AND SIGNALING
V	277295	1.17452	0.650807	7.56827	7.93e-05	9.42876	11.0743	71.3594	1134	378	277295
V	300479	2.66042	0.323853	7.44174	1.27e-14	4.33202	11.525	32.2377	1284	428	300479	KOG2614	Kynurenine 3-monooxygenase and related flavoprotein monooxygenases	General function prediction only	POORLY CHARACTERIZED
V	293231	0.796375	0.566887	7.32972	0.00451341	27.3101	21.7491	200.176	2894	862	293231	KOG1721	FOG: Zn-finger	General function prediction only	POORLY CHARACTERIZED
V	347307	0.353031	3.99e-05	7.26787	1.02e-09	20.8359	7.35572	151.433	741	247	347307
V	284131	0.300894	0.000207722	7.17456	0	14.9609	4.50165	107.338	918	306	284131	KOG3599	Ca2+-modulated nonselective cation channel polycystin	Inorganic ion transport and metabolism	METABOLISM
V	352044	0.630648	0.0154757	7.16399	6.56e-05	71.7249	45.2332	513.836	1128	376	352044	KOG4499	Ca2+-binding protein Regucalcin/SMP30	Inorganic ion transport and metabolism	METABOLISM
V	361748	0.300643	0.000142629	7.11237	0	14.8682	4.47001	105.748	1671	557	361748	KOG1721	FOG: Zn-finger	General function prediction only	POORLY CHARACTERIZED
V	291152	1.08572	0.874031	7.09246	0.000220918	6.30746	6.84813	44.7354	1561	408	291152	KOG2614	Kynurenine 3-monooxygenase and related flavoprotein monooxygenases	General function prediction only	POORLY CHARACTERIZED
V	312994	1.17463	0.820725	7.09002	1.59e-13	6.62305	7.77963	46.9576	1047	224	312994	KOG4754	Predicted phosphoglycerate mutase	Carbohydrate transport and metabolism	METABOLISM
V	289400	1.13868	0.896803	6.8582	0	72.072	82.0668	494.285	3528	1076	289400	KOG0202	Ca2+ transporting ATPase	Inorganic ion transport and metabolism	METABOLISM
V	284522	8.55669	0.00114181	6.64872	7.99e-06	1.68065	14.3808	11.1742	1701	437	284522
V	363190	0.442633	2.46e-05	6.51619	0	37.0808	16.4132	241.625	1584	466	363190	KOG1216	von Willebrand factor and related coagulation proteins	Extracellular structures	CELLULAR PROCESSES AND SIGNALING
V	346805	1.0294	0.959334	6.51574	0	31.3636	32.2857	204.357	3660	1220	346805	KOG0585	Ca2+/calmodulin-dependent protein kinase kinase beta and related serine/threonine protein kinases	Signal transduction mechanisms	CELLULAR PROCESSES AND SIGNALING
V	183687	0.152093	1.94e-08	6.4544	0	36.5099	5.5529	235.649	1905	635	183687	KOG2510	SWI-SNF chromatin-remodeling complex protein	Chromatin structure and dynamics	INFORMATION STORAGE AND PROCESSING
V	341540	44.378	0	6.2865	0.00060007	30.0501	1333.56	188.91	771	257	341540	KOG1414	Transcriptional activator FOSB/c-Fos and related bZIP transcription factors	Transcription	INFORMATION STORAGE AND PROCESSING
V	295426	7.76538	0.325762	6.27418	6.9e-05	161.207	1251.83	1011.44	2538	616	295426	KOG1721	FOG: Zn-finger	General function prediction only	POORLY CHARACTERIZED
V	356777	0.424885	0.000157023	6.2569	0.0251096	23.4938	9.98218	146.998	1010	312	356777
V	183625	0.811606	0.697723	6.15402	2.02e-13	43.5743	35.3652	268.157	1023	341	183625	KOG1318	Helix loop helix transcription factor EB	Transcription	INFORMATION STORAGE AND PROCESSING
V	351525	2.43576	0.252327	6.08663	0	10.4678	25.4972	63.714	1023	341	351525
V	209257	0.769792	0.449104	6.05934	0	112.959	86.955	684.458	1284	428	209257	KOG0583	Serine/threonine protein kinase	Signal transduction mechanisms	CELLULAR PROCESSES AND SIGNALING
V	361358	0.786152	0.759318	6.03364	1.09e-06	2.26013	1.7768	13.6368	3021	932	361358	KOG1840	Kinesin light chain	Cytoskeleton	CELLULAR PROCESSES AND SIGNALING
V	349922	0.635134	0.130313	5.99844	0	44.315	28.146	265.821	1998	666	349922	KOG1601	GATA-4/5/6 transcription factors	Transcription	INFORMATION STORAGE AND PROCESSING
V	273804	3.09209	0.17302	5.96745	1.47e-08	3.05733	9.45353	18.2445	3087	945	273804	KOG4711	Predicted membrane protein	General function prediction only	POORLY CHARACTERIZED
V	165127	2.76665	0	5.94934	9.43e-09	43.2118	119.552	257.082	1242	414	165127
V	275022	1.68053	0.406315	5.89072	0.0348563	12.7412	21.412	75.0549	1082	238	275022
V	21464	1.04502	0.956791	5.87656	0.00900366	75.2512	78.6392	442.218	1245	415	21464	KOG0401	Translation initiation factor 4F, ribosome/mRNA-bridging subunit (eIF-4G)	Translation, ribosomal structure and biogenesis	INFORMATION STORAGE AND PROCESSING
V	365235	0.638279	0.343143	5.83935	0	12.6793	8.09293	74.0388	3438	1128	365235
V	322501	3.98259	0.00653686	5.8268	1.42e-07	2.85959	11.3886	16.6623	338	73	322501
V	340844	24.1714	0.0015512	5.81088	4.14e-06	69.0256	1668.44	401.1	702	234	340844
V	224630	9.4993	0.0303302	5.75859	0.0107888	4.11914	39.129	23.7204	504	168	224630
V	300500	0.972384	0.908115	5.63837	0	61.1293	59.4412	344.67	1411	358	300500	KOG0956	PHD finger protein AF10	General function prediction only	POORLY CHARACTERIZED
V	351335	0.615091	0.258915	5.59401	2.37e-07	8.89963	5.47409	49.7846	1863	621	351335	KOG2510	SWI-SNF chromatin-remodeling complex protein	Chromatin structure and dynamics	INFORMATION STORAGE AND PROCESSING
V	297191	1.62587	0.434402	5.58034	9.62e-15	41.3212	67.1827	230.587	1781	504	297191	KOG3615	Uncharacterized conserved protein	Function unknown	POORLY CHARACTERIZED
V	357734	2.32205	0.200735	5.32296	0	58.537	135.926	311.59	951	317	357734	KOG0810	SNARE protein Syntaxin 1 and related proteins	Intracellular trafficking, secretion, and vesicular transport	CELLULAR PROCESSES AND SIGNALING
V	348227	8.84314	0.0371057	5.17058	0	12.2643	108.455	63.4136	1359	453	348227
V	273983	0.450796	0.0330449	5.01253	0	11.4985	5.18346	57.6364	1801	548	273983	KOG0802	E3 ubiquitin ligase	Posttranslational modification, protein turnover, chaperones	CELLULAR PROCESSES AND SIGNALING
VI	292113	>0,5	0.326434	>14,76	0.00109056	0	0.500384	14.7568	861	281	292113	KOG2501	Thioredoxin, nucleoredoxin and related proteins	General function prediction only	POORLY CHARACTERIZED
VI	352248	92.3725	0.0552283	12179.2	0	0.052422	4.84235	638.458	1398	466	352248	KOG2533	Permease of the major facilitator superfamily	Carbohydrate transport and metabolism	METABOLISM
VI	276760	13.2405	0.0723152	4886.78	6.49e-08	0.143522	1.9003	701.36	1858	534	276760	KOG0159	Cytochrome P450 CYP11/CYP12/CYP24/CYP27 subfamilies/sterol 27-hydroxylase	Secondary metabolites biosynthesis, transport and catabolism	METABOLISM
VI	279157	28.4955	0.0712014	4770.22	3.35e-15	0.0602443	1.71669	287.379	1272	382	279157	KOG1218	Proteins containing Ca2+-binding EGF-like domains	Signal transduction mechanisms	CELLULAR PROCESSES AND SIGNALING			x
VI	216767	737.032	0.0159199	3507.16	0.00632664	0.0228086	16.8107	79.9934	1182	394	216767	KOG0157	Cytochrome P450 CYP4/CYP19/CYP26 subfamilies	Secondary metabolites biosynthesis, transport and catabolism	METABOLISM
VI	301353	58.7091	0.0548143	3109.77	0	0.333174	19.5604	1036.1	1329	381	301353	KOG1502	Flavonol reductase/cinnamoyl-CoA reductase	Defense mechanisms	CELLULAR PROCESSES AND SIGNALING
VI	355669	1.06625	1	2152.57	0.00516523	0.0403917	0.0430676	86.9458	1092	364	355669					GH5+AF8-5	Glycoside Hydrolase Family 5 protein	x	x
VI	357938	2.15754	0.519245	1747.12	5.38e-06	0.5934	1.28028	1036.74	1607	502	357938	KOG0254	Predicted transporter (major facilitator superfamily)	General function prediction only	POORLY CHARACTERIZED
VI	273760	8.84284	0.332288	1518.84	0	0.0784518	0.693736	119.156	1811	593	273760	KOG1263	Multicopper oxidases	Secondary metabolites biosynthesis, transport and catabolism	METABOLISM	AA1+AF8-3	Laccase+AC0-like multicopper oxidase	x	x
VI	323947	5256.61	0.000969895	1337.21	3.11e-08	0.417996	2197.24	558.948	2055	619	323947	KOG1238	Glucose dehydrogenase/choline dehydrogenase/mandelonitrile lyase (GMC oxidoreductase family)	General function prediction only	POORLY CHARACTERIZED	AA3+AF8-3	Alcohol oxidase
VI	362698	21.2105	0.128013	1062.09	0	0.262124	5.55977	278.4	2485	747	362698
VI	360407	0.989255	0.985803	728.386	0	2.41237	2.38645	1757.14	972	320	360407	KOG0223	Aquaporin (major intrinsic protein family)	Carbohydrate transport and metabolism	METABOLISM
VI	356930	25.3879	0.13437	695.929	1.07e-09	0.0692289	1.75757	48.1784	1102	330	356930
VI	275219	14.0381	0.0352849	590.006	0.000144166	0.174974	2.45631	103.236	2346	782	275219
VI	284453	3.7603	0.42009	547.683	1.08e-08	0.21406	0.804931	117.237	1911	637	284453	KOG0254	Predicted transporter (major facilitator superfamily)	General function prediction only	POORLY CHARACTERIZED
VI	340477	15.1791	0.488783	540.206	2.25e-06	0.020825	0.316104	11.2498	864	288	340477							x				x
VI	350732	380.668	0.0588087	498.32	1.27e-05	1.01633	386.883	506.455	1512	504	350732	KOG0682	Ammonia permease	Inorganic ion transport and metabolism	METABOLISM
VI	364746	2.75929	0.213251	444.761	1.63e-05	1.03633	2.85954	460.92	1647	535	364746	KOG1516	Carboxylesterase and related proteins	General function prediction only	POORLY CHARACTERIZED
VI	201298	4.85265	0.662203	434.581	0.00156094	0.0467259	0.226744	20.3062	1533	511	201298	KOG0255	Synaptic vesicle transporter SVOP and related transporters (major facilitator superfamily)	General function prediction only	POORLY CHARACTERIZED
VI	361832	128.19	0.154458	378.58	2.47e-13	0.0521954	6.69094	19.7602	1890	630	361832							x
VI	179481	16.175	0.177888	377.737	0	0.0668764	1.08173	25.2617	1599	533	179481	KOG0101	Molecular chaperones HSP70/HSC70, HSP70 superfamily	Posttranslational modification, protein turnover, chaperones	CELLULAR PROCESSES AND SIGNALING
VI	360574	0.360232	0.816149	232.272	0	0.134213	0.0483478	31.1739	4420	1440	360574	KOG0430	Xanthine dehydrogenase	Nucleotide transport and metabolism	METABOLISM
VI	164210	14.1473	0.229981	218.975	0.000283277	0.0666906	0.943495	14.6036	972	324	164210					GH43	Glycoside Hydrolase Family 43 protein	x	x
VI	356464	13.783	0.0040409	214.033	0.00514018	0.309147	4.26097	66.1678	1973	537	356464							x
VI	157847	2.3261	0.185884	185.465	0	1.64026	3.81541	304.211	798	266	157847
VI	359107	0.887464	0.906458	167.291	0	1.53773	1.36468	257.248	1314	396	359107	KOG1153	Subtilisin-related protease/Vacuolar protease B	Posttranslational modification, protein turnover, chaperones	CELLULAR PROCESSES AND SIGNALING
VI	291039	13.388	0	144.865	0	7.48421	100.199	1084.2	1930	412	291039	KOG2766	Predicted membrane protein	Function unknown	POORLY CHARACTERIZED
VI	363332	14.293	0.0538549	137.72	0.0449057	0.382524	5.46744	52.6812	629	185	363332	KOG4726	Ultrahigh sulfur keratin-associated protein	Extracellular structures	CELLULAR PROCESSES AND SIGNALING	CBM18+AC0-CBM18+AC0-CBM18	Carbohydrate+AC0-Binding Module Family 18 protein	x	x
VI	358589	2.47628	0.271087	134.714	9.15e-05	2.37684	5.88571	320.192	3327	1067	358589	KOG1066	Glucosidase II catalytic (alpha) subunit and related enzymes, glycosyl hydrolase family 31	Carbohydrate transport and metabolism	METABOLISM	GH31	Glycoside Hydrolase Family 31 protein
VI	361947	28.575	0.206991	126.795	8.42e-07	0.0740107	2.11486	9.38417	1089	363	361947
VI	321444	14.6771	0.097304	121.058	0	12.7146	186.613	1539.2	1121	329	321444
VI	360040	3.68293	0.0564134	120.35	5.3e-07	1.07336	3.9531	129.179	1173	346	360040	KOG1575	Voltage-gated shaker-like K+ channel, subunit beta/KCNAB	Energy production and conversion	METABOLISM
VI	300190	1.42584	0.748094	115.343	0	1.9548	2.78723	225.472	1958	559	300190	KOG1286	Amino acid transporters	Amino acid transport and metabolism	METABOLISM
VI	282882	0.359145	0.0107249	113.549	1.57e-14	8.85417	3.17993	1005.38	759	148	282882
VI	272585	16.9482	0.23893	113.449	0.000481116	0.343902	5.82852	39.0153	1270	416	272585							x
VI	279690	3.76997	0.390809	107.531	4.62e-11	0.264364	0.996647	28.4273	1725	575	279690	KOG0255	Synaptic vesicle transporter SVOP and related transporters (major facilitator superfamily)	General function prediction only	POORLY CHARACTERIZED
VI	360409	0.656284	0.383295	91.5026	0	5.1803	3.39975	474.011	784	219	360409							x				x
VI	357697	0.538509	0.222804	89.8405	1.53e-13	5.12626	2.76054	460.546	1480	406	357697
VI	288018	0.916177	0.905292	89.52	0.00071811	3.11356	2.85257	278.726	828	276	288018	KOG0849	Transcription factor PRD and related proteins, contain PAX and HOX domains	Transcription	INFORMATION STORAGE AND PROCESSING
VI	177597	63.8713	5.48e-05	88.0718	4.98e-13	3.21091	205.085	282.79	1551	517	177597	KOG0254	Predicted transporter (major facilitator superfamily)	General function prediction only	POORLY CHARACTERIZED
VI	361220	0.0470893	2.66e-12	87.0928	2.12e-06	65.5718	3.08773	5710.83	519	122	361220							x				x
VI	284556	6.10464	0.10224	78.3156	3.2e-13	0.343631	2.09774	26.9117	2640	880	284556
VI	285276	0.860419	0.694281	73.5236	0	8.61658	7.41387	633.522	1560	463	285276	KOG0255	Synaptic vesicle transporter SVOP and related transporters (major facilitator superfamily)	General function prediction only	POORLY CHARACTERIZED
VI	365804	1.71999	0.528629	67.5266	2.63e-05	1.27633	2.19527	86.186	2330	651	365804	KOG0039	Ferric reductase, NADH/NADPH oxidase and related proteins	Secondary metabolites biosynthesis, transport and catabolism	METABOLISM
VI	191837	19.2175	0.0018471	64.7209	1.57e-14	1.38937	26.7002	89.9214	1038	346	191837					CE8	Carbohydrate Esterase Family 8 protein	x	x
VI	289606	0.122339	0.0572569	64.7133	1.97e-05	27.15	3.3215	1756.96	1396	214	289606							x		x
VI	211764	56.5979	0.113921	62.9492	0.000438403	1.27357	72.0815	80.1703	1005	335	211764							x
VI	314308	58.1281	0.138974	61.1678	5.11e-10	4.62932	269.094	283.165	2127	541	314308	KOG1287	Amino acid transporters	Amino acid transport and metabolism	METABOLISM
VI	273852	8.04286	0.272434	60.276	2.39e-13	18.4195	148.145	1110.25	2020	565	273852	KOG2493	Na+/Pi symporter	Inorganic ion transport and metabolism	METABOLISM
VI	339907	27.9895	0.000306098	55.2393	3.23e-07	25.0463	701.032	1383.54	3575	1080	339907	KOG2408	Peroxidase/oxygenase	General function prediction only	POORLY CHARACTERIZED
VI	361116	0.183915	0.0466506	50.3815	2.15e-11	3.09231	0.568723	155.795	2013	591	361116	KOG0254	Predicted transporter (major facilitator superfamily)	General function prediction only	POORLY CHARACTERIZED
VI	357387	0.378855	0.0975954	49.9066	0	4.33127	1.64092	216.159	1631	491	357387	KOG0254	Predicted transporter (major facilitator superfamily)	General function prediction only	POORLY CHARACTERIZED
VI	363900	1.28739	0.797459	47.2168	6.87e-06	1.59387	2.05194	75.2575	1534	507	363900	KOG4462	WASP-interacting protein VRP1/WIP, contains WH2 domain	Cytoskeleton	CELLULAR PROCESSES AND SIGNALING
VI	360568	1.87035	0.198594	45.9827	0.000124601	3.12083	5.83704	143.504	1328	402	360568					GH5+AF8-9	Glycoside Hydrolase Family 5 protein	x	x
VI	274027	2.58323	0.573679	44.7128	3.83e-06	7.88188	20.3607	352.421	915	305	274027	KOG0725	Reductases with broad range of substrate specificities	General function prediction only	POORLY CHARACTERIZED
VI	307501	0.535539	0.124248	44.6176	9.04e-09	11.8995	6.37262	530.925	2085	489	307501	KOG2533	Permease of the major facilitator superfamily	Carbohydrate transport and metabolism	METABOLISM
VI	274667	0.991613	0.960464	43.9298	4.46e-05	18.254	18.1009	801.894	1764	395	274667							x
VI	171036	2.04777	0.500465	43.4309	1.32e-06	4.67738	9.57818	203.143	1320	440	171036
VI	282704	0.673192	0.559796	41.7031	3.26e-05	3.26755	2.19969	136.267	1548	483	282704	KOG2504	Monocarboxylate transporter	Carbohydrate transport and metabolism	METABOLISM
VI	189106	13.3061	1.11e-05	40.8653	1.38e-11	10.5895	140.905	432.744	1716	572	189106	KOG1286	Amino acid transporters	Amino acid transport and metabolism	METABOLISM
VI	319863	1.39908	0.569704	40.6792	0	16.4298	22.9866	668.353	818	154	319863
VI	314690	0.419782	0.0187138	39.4015	0	18.036	7.57117	710.644	2046	627	314690	KOG0254	Predicted transporter (major facilitator superfamily)	General function prediction only	POORLY CHARACTERIZED
VI	284562	5.7796	9.05e-06	37.5855	5.47e-09	3.3585	19.4108	126.231	756	252	284562	KOG3043	Predicted hydrolase related to dienelactone hydrolase	General function prediction only	POORLY CHARACTERIZED
VI	275584	5.29714	0.0928637	35.6898	0	0.767337	4.06469	27.3861	1263	420	275584	KOG1282	Serine carboxypeptidases (lysosomal cathepsin A)	Amino acid transport and metabolism	METABOLISM
VI	306191	0.170363	1.86e-21	35.5624	0	96.3772	16.4191	3427.41	806	207	306191
VI	355705	8.61584	0.000109627	34.6647	0	2.496	21.5051	86.5231	1899	570	355705	KOG1176	Acyl-CoA synthetase	Lipid transport and metabolism	METABOLISM
VI	289666	13.6243	0.0516931	34.3811	0.00676269	25.3119	344.857	870.251	2072	526	289666	KOG0254	Predicted transporter (major facilitator superfamily)	General function prediction only	POORLY CHARACTERIZED
VI	279768	1.01787	1	31.8984	0.00424592	1.88479	1.91848	60.1218	1745	536	279768	KOG0254	Predicted transporter (major facilitator superfamily)	General function prediction only	POORLY CHARACTERIZED
VI	282248	2.11865	0.281228	31.5963	0.000247932	1.561	3.30723	49.3221	1752	558	282248	KOG0039	Ferric reductase, NADH/NADPH oxidase and related proteins	Secondary metabolites biosynthesis, transport and catabolism	METABOLISM
VI	351788	0.117651	0.0434239	31.1078	1.45e-05	2.56273	0.301508	79.7208	1548	516	351788	KOG4389	Acetylcholinesterase/Butyrylcholinesterase	Signal transduction mechanisms	CELLULAR PROCESSES AND SIGNALING			x			x
VI	276810	2.16467	0.237281	29.7313	0.0182661	1.60368	3.47143	47.6793	2346	782	276810	KOG2100	Dipeptidyl aminopeptidase	Posttranslational modification, protein turnover, chaperones	CELLULAR PROCESSES AND SIGNALING			x		x
VI	274938	0.18756	0.00997902	26.5985	0.00183075	5.01596	0.940793	133.417	1099	322	274938							x
VI	317573	1.98627	0.225912	26.418	1.08e-10	27.6	54.8212	729.139	2160	595	317573	KOG0101	Molecular chaperones HSP70/HSC70, HSP70 superfamily	Posttranslational modification, protein turnover, chaperones	CELLULAR PROCESSES AND SIGNALING
VI	366260	0.146769	7.96e-08	25.3649	0.0061461	17.8703	2.62281	453.279	1261	394	366260					CE4	Carbohydrate Esterase Family 4 protein	x	x
VI	280310	0.946513	0.898208	23.871	0.00106631	5.67151	5.36816	135.385	3624	1208	280310	KOG0207	Cation transport ATPase	Inorganic ion transport and metabolism	METABOLISM
VI	284584	13.2551	0.000821462	23.787	0	2.36614	31.3633	56.2834	2206	676	284584	KOG1289	Amino acid transporters	Amino acid transport and metabolism	METABOLISM
VI	290014	1.81157	0.542145	23.7058	1.02e-06	4.79035	8.67806	113.559	1068	332	290014	KOG1575	Voltage-gated shaker-like K+ channel, subunit beta/KCNAB	Energy production and conversion	METABOLISM
VI	367021	0.503323	0.613521	23.6631	7.93e-10	0.922571	0.464352	21.8309	2318	710	367021
VI	285925	1.37112	0.483184	23.3086	0.000824874	45.3955	62.2428	1058.11	2464	703	285925	KOG3742	Glycogen synthase	Carbohydrate transport and metabolism	METABOLISM	GT3	Glycosyltransferase Family 3 protein
VI	352323	4.48552	0.478341	22.8174	0.0130662	0.128785	0.577669	2.93855	1533	511	352323
VI	232632	21.9107	5.49e-09	21.0615	3.04e-09	22.6152	495.515	476.309	2085	695	232632	KOG0260	RNA polymerase II, large subunit	Transcription	INFORMATION STORAGE AND PROCESSING
VI	317586	2.99457	0.348313	20.7439	0	5.76595	17.2665	119.608	1769	573	317586	KOG0101	Molecular chaperones HSP70/HSC70, HSP70 superfamily	Posttranslational modification, protein turnover, chaperones	CELLULAR PROCESSES AND SIGNALING
VI	273623	8.05535	0.0695397	20.5203	0.046063	0.863423	6.95518	17.7177	872	242	273623							x				x
VI	351109	5.39046	0.415863	20.2844	1.31e-13	2.6266	14.1585	53.2789	1365	455	351109	KOG4126	Alkaline phosphatase	Inorganic ion transport and metabolism	METABOLISM
VI	216802	8.42116	0.206196	19.0602	0	17.0764	143.803	325.48	2073	691	216802	KOG0039	Ferric reductase, NADH/NADPH oxidase and related proteins	Secondary metabolites biosynthesis, transport and catabolism	METABOLISM
VI	283708	2.96418	0.189387	18.4064	9.53e-08	0.90266	2.67565	16.6148	1911	637	283708							x		x
VI	277013	0.506972	0.229905	18.0656	3.22e-05	17.8462	9.04753	322.403	2977	892	277013	KOG3815	Transcription factor Doublesex	Transcription	INFORMATION STORAGE AND PROCESSING
VI	288038	0.1569	0.00036632	18.06	2.69e-05	8.05269	1.26346	145.431	1953	651	288038	KOG0255	Synaptic vesicle transporter SVOP and related transporters (major facilitator superfamily)	General function prediction only	POORLY CHARACTERIZED
VI	225272	0.0257903	5.09e-22	17.9752	1.2e-06	35.8106	0.923565	643.704	1077	359	225272	KOG1558	Fe2+/Zn2+ regulated transporter	Inorganic ion transport and metabolism	METABOLISM
VI	276107	0.155875	0.000372528	17.9205	9.42e-05	7.9938	1.24603	143.253	1953	651	276107	KOG0255	Synaptic vesicle transporter SVOP and related transporters (major facilitator superfamily)	General function prediction only	POORLY CHARACTERIZED
VI	285481	0.507487	0.155433	17.9014	0.000520359	6.09428	3.09277	109.096	886	276	285481
VI	352631	78.9241	0.215479	17.3439	2.99e-12	3.63161	286.622	62.9865	2664	888	352631	KOG0202	Ca2+ transporting ATPase	Inorganic ion transport and metabolism	METABOLISM
VI	343434	0.319849	2.25e-05	17.2242	0	19.9042	6.36634	342.834	1002	334	343434	KOG0048	Transcription factor, Myb superfamily	Transcription	INFORMATION STORAGE AND PROCESSING
VI	318988	88.9139	8.62e-07	17.0743	0.0286018	1.36779	121.616	23.3542	1364	287	318988	KOG1209	1-Acyl dihydroxyacetone phosphate reductase and related dehydrogenases	Secondary metabolites biosynthesis, transport and catabolism	METABOLISM
VI	309346	1.15571	0.872509	16.6003	8e-05	296.22	342.344	4917.34	1634	459	309346	KOG2250	Glutamate/leucine/phenylalanine/valine dehydrogenases	Amino acid transport and metabolism	METABOLISM
VI	364650	10.1263	0.00184578	16.3934	1.14e-05	0.522939	5.29543	8.57274	1422	321	364650	KOG0744	AAA+-type ATPase	Posttranslational modification, protein turnover, chaperones	CELLULAR PROCESSES AND SIGNALING
VI	301870	3.2112	0.00169443	15.798	1.66e-07	7.09819	22.7937	112.138	2037	544	301870	KOG0628	Aromatic-L-amino-acid/L-histidine decarboxylase	Amino acid transport and metabolism	METABOLISM
VI	161415	268.456	0.15499	15.3646	0.00236958	46.165	12393.3	709.308	1446	482	161415	KOG0258	Alanine aminotransferase	Amino acid transport and metabolism	METABOLISM
VI	317609	2.45163	0.370895	15.13	1.48e-08	3.36897	8.25946	50.9727	2059	587	317609	KOG0101	Molecular chaperones HSP70/HSC70, HSP70 superfamily	Posttranslational modification, protein turnover, chaperones	CELLULAR PROCESSES AND SIGNALING
VI	280489	0.407421	0.23077	14.9667	0.00523041	2.68155	1.09252	40.1339	1520	414	280489
VI	207929	3.37542	0.0385694	14.4547	0.000725573	5.25485	17.7373	75.9572	1329	443	207929
VI	233155	103.705	1.65e-07	14.0785	4.24e-05	21.3708	2216.26	300.87	4581	1527	233155	KOG0560	Sulfite reductase (ferredoxin)	Inorganic ion transport and metabolism	METABOLISM
VI	292316	0.148061	4.21e-12	13.3336	2.97e-13	39.9729	5.91845	532.983	2120	533	292316	KOG0159	Cytochrome P450 CYP11/CYP12/CYP24/CYP27 subfamilies	Secondary metabolites biosynthesis, transport and catabolism	METABOLISM
VI	356459	2.07639	0.120174	13.1679	0.0240128	3.46993	7.20494	45.6918	1348	382	356459	KOG1604	Predicted mutarotase	Carbohydrate transport and metabolism	METABOLISM			x
VI	354085	1.5721	0.0417587	12.7476	0.017353	22.2474	34.9752	283.601	1365	455	354085	KOG2533	Permease of the major facilitator superfamily	Carbohydrate transport and metabolism	METABOLISM
VI	21302	1.69538	0.753621	12.5515	0.00186971	0.37731	0.639682	4.73581	864	288	21302	KOG4415	Uncharacterized conserved protein	Function unknown	POORLY CHARACTERIZED
VI	317595	1.54025	0.594386	12.5383	2.93e-05	17.363	26.7432	217.701	2142	587	317595	KOG0101	Molecular chaperones HSP70/HSC70, HSP70 superfamily	Posttranslational modification, protein turnover, chaperones	CELLULAR PROCESSES AND SIGNALING
VI	359103	0.785157	0.7382	12.2717	0.000271088	2.75527	2.16332	33.812	894	298	359103
VI	304669	43.6999	0.0469254	12.0191	1.04e-05	177.439	7754.08	2132.66	1185	204	304669	KOG3135	1,4-benzoquinone reductase-like; Trp repressor binding protein-like/protoplast-secreted protein	General function prediction only	POORLY CHARACTERIZED	AA6	Benzoquinone reductase
VI	328608	86.6001	0.0155363	11.9557	0	9.2629	802.168	110.744	2564	723	328608	KOG0047	Catalase	Inorganic ion transport and metabolism	METABOLISM			x
VI	229332	1.11505	0.784219	11.8908	8.8e-11	43.9444	49.0005	522.534	3045	1015	229332	KOG2161	Glucosidase I	Carbohydrate transport and metabolism	METABOLISM
VI	159933	3.12182	0.377522	11.7477	0.00407489	0.353976	1.10505	4.1584	1320	440	159933							x
VI	291385	2.40505	0.387434	11.7044	0	22.0193	52.9574	257.724	3349	1060	291385	KOG1336	Monodehydroascorbate/ferredoxin reductase	General function prediction only	POORLY CHARACTERIZED
VI	273698	0.12515	0.00575036	11.6383	1.26e-08	4.66773	0.584164	54.3246	1521	507	273698	KOG0255	Synaptic vesicle transporter SVOP and related transporters (major facilitator superfamily)	General function prediction only	POORLY CHARACTERIZED
VI	358349	0.129893	0.000237234	11.6283	0	8.06394	1.04745	93.7702	1158	386	358349
VI	295940	0.493934	0.0735228	11.6203	1.84e-08	9.42504	4.65535	109.522	1699	457	295940	KOG0255	Synaptic vesicle transporter SVOP and related transporters (major facilitator superfamily)	General function prediction only	POORLY CHARACTERIZED
VI	349952	0.940565	0.895527	11.4933	2.09e-07	34.8893	32.8157	400.994	1620	540	349952
VI	354692	1.82422	2.06e-07	11.4227	2.13e-13	47.6946	87.0054	544.798	1086	362	354692
VI	283269	1.40696	0.253087	11.2579	5.06e-05	66.7512	93.916	751.481	2624	675	283269	KOG3770	Acid sphingomyelinase and PHM5 phosphate metabolism protein	Lipid transport and metabolism	METABOLISM
VI	290957	2.52744	0.239399	11.2216	7.68e-08	11.1599	28.206	125.233	2110	568	290957	KOG1176	Acyl-CoA synthetase	Lipid transport and metabolism	METABOLISM
VI	356378	0.193295	4.04e-25	11.2097	3.35e-15	73.5637	14.2195	824.628	2046	502	356378	KOG2533	Permease of the major facilitator superfamily	Carbohydrate transport and metabolism	METABOLISM
VI	331454	560.484	0.0710259	11.0377	2.75e-09	3.70874	2078.69	40.9359	1478	354	331454	KOG1575	Voltage-gated shaker-like K+ channel, subunit beta/KCNAB	Energy production and conversion	METABOLISM
VI	284973	2.31012	0.313968	10.9641	4.18e-10	1.91103	4.41471	20.9527	2650	866	284973
VI	357249	0.370179	0.00024919	10.805	2.08e-05	22.8007	8.44036	246.362	2421	807	357249	KOG3689	Cyclic nucleotide phosphodiesterase	Signal transduction mechanisms	CELLULAR PROCESSES AND SIGNALING
VI	344847	1.64771	0.596096	10.5889	0	6.57335	10.831	69.6046	1020	340	344847	KOG1502	Flavonol reductase/cinnamoyl-CoA reductase	Defense mechanisms	CELLULAR PROCESSES AND SIGNALING
VI	358840	2.09976	0.508094	10.4963	0	146.635	307.899	1539.12	933	266	358840
VI	275271	0.323849	1.03e-07	10.4594	0.00495342	32.3304	10.4702	338.157	1925	566	275271	KOG1286	Amino acid transporters	Amino acid transport and metabolism	METABOLISM
VI	352893	2.44282	0.0125886	10.2298	3.71e-07	4.38571	10.7135	44.8651	1749	583	352893	KOG2533	Permease of the major facilitator superfamily	Carbohydrate transport and metabolism	METABOLISM
VI	233180	0.394975	0.40379	9.94655	1.28e-07	1.34613	0.531688	13.3893	1062	354	233180
VI	275152	1.08268	0.954621	9.8283	0.00627017	36.7673	39.8072	361.36	1066	309	275152
VI	288696	27.4031	0.0251717	9.6888	0	42.1124	1154.01	408.019	3114	827	288696	KOG0236	Sulfate/bicarbonate/oxalate exchanger SAT-1 and related transporters (SLC26 family)	Inorganic ion transport and metabolism	METABOLISM
VI	287296	0.712497	0.435707	9.21822	1.25e-12	10.3411	7.36801	95.3267	957	319	287296
VI	286547	1.73313	0.374444	8.92228	0.00143645	4.55353	7.89185	40.6279	1191	270	286547	KOG1269	SAM-dependent methyltransferases	General function prediction only	POORLY CHARACTERIZED
VI	357032	0.81101	0.614341	8.90327	0	11.8327	9.59647	105.35	929	245	357032	KOG3043	Predicted hydrolase related to dienelactone hydrolase	General function prediction only	POORLY CHARACTERIZED
VI	25197	1.50275	0.251525	8.83972	0	6.93772	10.4257	61.3275	1905	635	25197
VI	273472	0.801189	0.423416	8.74122	0.00615997	16.544	13.2548	144.614	2400	800	273472	KOG0386	Chromatin remodeling complex SWI/SNF, component SWI2 and related ATPases (DNA/RNA helicase superfamily)	Chromatin structure and dynamics	INFORMATION STORAGE AND PROCESSING
VI	272503	5.7056	0.00267386	8.64483	2.58e-07	3.39219	19.3544	29.3249	2511	688	272503	KOG0137	Very-long-chain acyl-CoA dehydrogenase	Lipid transport and metabolism	METABOLISM
VI	342084	4.36357	0.374359	8.31682	0	14.2376	62.1268	118.412	2676	892	342084					GH3	Glycoside Hydrolase Family 3 protein
VI	296166	0.799456	0.631262	8.21269	0.000913743	22.7984	18.2264	187.237	2185	626	296166
VI	349203	7.27407	0.28333	7.9681	1.63e-05	45.3987	330.233	361.741	909	303	349203
VI	307737	45.5216	0.000481129	7.93153	3.82e-10	93.3696	4250.33	740.564	1575	309	307737	KOG0189	Phosphoadenosine phosphosulfate reductase	Amino acid transport and metabolism	METABOLISM
VI	365803	0.230639	0.00296076	7.85246	5.9e-10	7.42913	1.71345	58.3369	1773	526	365803	KOG0254	Predicted transporter (major facilitator superfamily)	General function prediction only	POORLY CHARACTERIZED
VI	290466	0.499221	0.038778	7.73771	0.000275471	10.7028	5.34305	82.8148	890	291	290466
VI	167301	0.558767	0.10246	7.66809	2.5e-12	29.324	16.3853	224.859	1437	479	167301	KOG4128	Bleomycin hydrolases and aminopeptidases of cysteine protease family	Amino acid transport and metabolism	METABOLISM
VI	63764	0.96955	0.92605	7.59663	1.7e-07	9.50835	9.21882	72.2314	921	307	63764
VI	353083	0.352571	4.52e-06	7.43969	2.56e-06	165.255	58.2643	1229.45	2034	678	353083	KOG0470	1,4-alpha-glucan branching enzyme/starch branching enzyme II	Carbohydrate transport and metabolism	METABOLISM	CBM48+AC0-GH13+AF8-8	Carbohydrate+AC0-Binding Module Family 48 / Glycoside Hydrolase Family 13 protein
VI	366069	0.323311	0.0403297	7.34748	0	35.3557	11.4309	259.775	1533	511	366069	KOG2533	Permease of the major facilitator superfamily	Carbohydrate transport and metabolism	METABOLISM
VI	349576	1.36644	0.683504	7.21158	6.93e-07	3.52596	4.818	25.4277	1269	423	349576	KOG4472	Glycolipid 2-alpha-mannosyltransferase (alpha-1,2-mannosyltransferase)	Carbohydrate transport and metabolism	METABOLISM	GT15	Glycosyltransferase Family 15 protein
VI	335494	114.746	0.00653034	7.05285	1.75e-06	19.4944	2236.9	137.491	1862	576	335494	KOG0636	ATP sulfurylase (sulfate adenylyltransferase)	Inorganic ion transport and metabolism	METABOLISM
VI	154360	0.237946	1.06e-11	6.99249	0.000342268	38.2251	9.09549	267.289	1230	410	154360
VI	342419	5.14074	1.25e-12	6.94467	0.00202544	6.6226	34.0451	45.9918	1470	490	342419	KOG2100	Dipeptidyl aminopeptidase	Posttranslational modification, protein turnover, chaperones	CELLULAR PROCESSES AND SIGNALING
VI	285859	0.39625	0.00811483	6.81936	0	11.834	4.68923	80.7004	1805	597	285859	KOG0626	Beta-glucosidase, lactase phlorizinhydrolase, and related proteins	Carbohydrate transport and metabolism	METABOLISM	GH1	Glycoside Hydrolase Family 1 protein	x	x
VI	277277	1.73653	0.687539	6.71027	1.07e-10	3.56056	6.18303	23.8923	963	302	277277
VI	353973	0.293948	1.18e-06	6.66478	5.17e-10	24.1913	7.11098	161.229	1173	391	353973	KOG2665	Predicted FAD-dependent oxidoreductase	Function unknown	POORLY CHARACTERIZED
VI	358712	0.214513	1.4e-23	6.5182	0	149.163	31.9975	972.276	2719	876	358712	KOG1046	Puromycin-sensitive aminopeptidase and related aminopeptidases	Amino acid transport and metabolism	METABOLISM
VI	364016	23.3397	0.093754	6.45249	2.7e-05	1.5743	36.7437	10.1581	1324	376	364016
VI	353347	0.0699608	2.43e-14	6.35591	0.00109056	26.0282	1.82095	165.433	993	331	353347	KOG4742	Predicted chitinase	General function prediction only	POORLY CHARACTERIZED	CBM18+AC0-CE4	Carbohydrate+AC0-Binding Module Family 18 / Carbohydrate Esterase Family 4 protein	x	x
VI	350869	1.53914	0.16935	6.30974	0.00084533	11.1844	17.2144	70.5708	1602	534	350869	KOG1369	Hexokinase	Carbohydrate transport and metabolism	METABOLISM
VI	357556	3.65942	0.0943569	6.16565	0.0432464	0.846618	3.09813	5.21995	2322	774	357556	KOG0221	Mismatch repair ATPase MSH5 (MutS family)	Replication, recombination and repair	INFORMATION STORAGE AND PROCESSING
VI	156628	1.88969	0.256605	6.10664	0.00477172	2.76481	5.22463	16.8837	618	206	156628
VI	276802	3.12417	0.0767236	5.99763	0.00176692	1.30285	4.07033	7.814	2370	790	276802	KOG2100	Dipeptidyl aminopeptidase	Posttranslational modification, protein turnover, chaperones	CELLULAR PROCESSES AND SIGNALING			x		x
VI	302097	0.366348	0.0324463	5.95593	0.00223789	7.30796	2.67726	43.5257	1605	504	302097							x
VI	158517	7.31621	0.298699	5.84404	4.85e-06	73.0741	534.625	427.048	993	331	158517	KOG1759	Macrophage migration inhibitory factor	Defense mechanisms	CELLULAR PROCESSES AND SIGNALING
VI	350465	1.06031	0.954846	5.76223	4.15e-08	4.59935	4.87674	26.5025	1173	391	350465	KOG0626	Beta-glucosidase, lactase phlorizinhydrolase, and related proteins	Carbohydrate transport and metabolism	METABOLISM	GH1	Glycoside Hydrolase Family 1 protein
VI	295303	1.21725	0.872509	5.67853	0	90.5589	110.233	514.241	2112	532	295303	KOG0158	Cytochrome P450 CYP3/CYP5/CYP6/CYP9 subfamilies	Secondary metabolites biosynthesis, transport and catabolism	METABOLISM
VI	299359	0.450698	0.000718065	5.56497	2.39e-05	57.385	25.8633	319.346	2445	606	299359	KOG0255	Synaptic vesicle transporter SVOP and related transporters (major facilitator superfamily)	General function prediction only	POORLY CHARACTERIZED
VI	358977	2.64778	0.0723131	5.54441	0.0438198	1.98289	5.25027	10.994	2053	634	358977
VI	210569	0.895422	0.843876	5.53847	0.00751587	25.0953	22.4709	138.99	255	85	210569
VI	311367	0.813089	0.517049	5.45353	5.06e-08	215.609	175.31	1175.83	1326	332	311367	KOG1494	NAD-dependent malate dehydrogenase	Energy production and conversion	METABOLISM
VI	329003	0.99392	0.96839	5.44206	0	137.309	136.475	747.247	2030	562	329003	KOG2446	Glucose-6-phosphate isomerase	Carbohydrate transport and metabolism	METABOLISM
VI	356273	0.842751	0.71944	5.40831	0.000671784	5.93415	5.00101	32.0937	2137	558	356273	KOG2816	Predicted transporter ADD1 (major facilitator superfamily)	General function prediction only	POORLY CHARACTERIZED
VI	283417	0.276743	0.00750201	5.37478	0	7.19768	1.99191	38.686	1820	586	283417	KOG0101	Molecular chaperones HSP70/HSC70, HSP70 superfamily	Posttranslational modification, protein turnover, chaperones	CELLULAR PROCESSES AND SIGNALING
VI	307164	30.1809	0.00539539	5.34341	1.26e-05	2.73456	82.5315	14.6119	1684	410	307164					GH76	Glycoside Hydrolase Family 76 protein
VI	287708	3.3791	0.0417714	5.34235	1.43e-08	77.642	262.36	414.791	2020	543	287708
VI	301675	2.66285	0.370999	5.30286	2.56e-11	8.40725	22.3872	44.5825	4183	1260	301675	KOG0055	Multidrug/pheromone exporter, ABC superfamily	Secondary metabolites biosynthesis, transport and catabolism	METABOLISM
VI	284447	0.66527	0.246288	5.23649	0.00282651	10.018	6.66464	52.4589	2019	630	284447	KOG0254	Predicted transporter (major facilitator superfamily)	General function prediction only	POORLY CHARACTERIZED
VI	284316	0.309233	2.37e-11	5.20129	1.87e-09	54.3855	16.8178	282.875	1605	460	284316	KOG1406	Peroxisomal 3-ketoacyl-CoA-thiolase P-44/SCP2	Lipid transport and metabolism	METABOLISM
VI	278812	0.269418	8.16e-05	5.16169	0	16.4608	4.43484	84.9657	2991	876	278812	KOG2230	Predicted beta-mannosidase	Carbohydrate transport and metabolism	METABOLISM	GH2	Glycoside Hydrolase Family 2 protein
VI	356377	0.282005	9.57e-10	5.06591	0	69.4984	19.5989	352.073	2793	931	356377	KOG0535	Sulfite oxidase, molybdopterin-binding component	Energy production and conversion	METABOLISM
VI	340946	0.546473	0.137696	5.00703	0	92.621	50.6149	463.756	1503	501	340946	KOG2992	Nucleolar GTPase/ATPase p130	Nuclear structure	CELLULAR PROCESSES AND SIGNALING

## Sheet: Table 5 
Supplementary Table 5. Downregulated genes (>5-fold) in Tuber magnatum ectomycorrhizae (ECM) compared to free-living mycelium (FLM). Downregulated genes in fruiting-body (FB) are also showed. ND, not detected in ECM.
Protein ID	Fold change FB vs FLM	FDR p-value	Fold change ECM vs FLM	FDR p-value correction	FLM mean rpkm	FB mean rpkm	ECM mean rpkm	transcript Size	protein Size	ecNum	KEGG annotation	GO annotation	GO_Acc	kogid	kogdefline	kogClass	kogGroup	Interpro ID	Interpro annotation	Cazy description	Cazy defline	predicted secreted Protein	SSP (>300aa)
309001	2.11967	0.364967	ND	0.00508873	3.27645	6.94499	0	461	61					KOG1134	Uncharacterized conserved protein	General function prediction only	POORLY CHARACTERIZED					x	x
315806	4.86928	9.72806e-07	ND	0.00281878	3.61413	17.5982	0	493	70													x	x
319629	0.421274	0.154384	ND	0.0018298	3.93836	1.65913	0	328	72													x	x
308244	2.21954	0.0565654	ND	0.0036648	3.4539	7.66607	0	748	77													x	x
317972	0.69683	0.665461	ND	0.0246744	2.15282	1.50015	0	445	98													x	x
363488	1.03303	0.989326	ND	0.00637273	3.07778	3.17943	0	462	103													x	x
345002	0.585115	0.496652	ND	0.0162477	2.44005	1.42771	0	378	126													x	x
362447	0.0377385	8.02305e-33	ND	6.0425e-37	234.662	8.8558	0	545	129													x	x
363486	0.0920682	0.0010828	ND	0.000156644	5.59271	0.514911	0	393	131													x	x
345121	0.0559122	5.53689e-10	ND	1.44483e-11	16.7663	0.937438	0	393	131													x	x
365294	0.889456	0.970707	ND	0.0486071	1.75502	1.56101	0	467	147					KOG4157	beta-1,6-N-acetylglucosaminyltransferase, contains WSC domain	Carbohydrate transport and metabolism	METABOLISM					x	x
366834	0.022658	0.0543957	ND	0.0484022	14.5038	0.328626	0	861	227													x	x
167790	43.2384	0.00877934	ND	0.0324567	1.98582	85.8638	0	768	256											AA11	Lytic polysaccharide monooxygenase	x
347274	0.137034	0.000436028	ND	2.27973e-05	50.3859	6.9046	0	1089	363													x
273389	0.126566	0.00336555	ND	0.000300487	5.17445	0.65491	0	1538	425	3.4.21.-	Serine endopeptidases.	proprotein convertase activity	GO:0016808	KOG1153	Subtilisin-related protease/Vacuolar protease B	Posttranslational modification, protein turnover, chaperones	CELLULAR PROCESSES AND SIGNALING	IPR009020	Proteinase inhibitor, propeptide			x
338303	31.4553	0.00173862	ND	1.00585e-05	7.47913	235.259	0	385	66
354279	21.4317	0.00478264	ND	0.0388193	5.44643	116.726	0	282	94
334829	17.9172	0.00375782	ND	0.0100996	2.76534	49.5471	0	1008	196
334754	13.2016	0.0331749	ND	1.7365e-05	7.08071	93.477	0	344	102
348608	12.8006	0.0227109	ND	0.00598685	3.11879	39.9225	0	315	105
334719	10.6988	0.0316056	ND	0.00303201	3.56345	38.1246	0	450	63
329255	10.4412	0.0195599	ND	3.11394e-10	19.1632	200.086	0	594	119
303836	5.80664	0	ND	1.27881e-12	18.3845	106.752	0	385	110
355813	0.199299	0.00597981	ND	0.000379153	36.9537	7.36485	0	560	106			transport	GO:0006810	KOG0934	Clathrin adaptor complex, small subunit	Intracellular trafficking, secretion, and vesicular transport	CELLULAR PROCESSES AND SIGNALING	IPR011012	Longin-like
30861	0.195578	6.88006e-07	ND	4.42946e-11	122.215	23.9025	0	168	56
365114	0.190289	0.00109476	ND	6.07111e-06	11.6712	2.22089	0	462	154
186675	0.182451	1.23253e-09	ND	1.07182e-16	24.8153	4.52758	0	294	98
177482	0.163769	0.0498864	ND	0.00957651	2.80351	0.459128	0	303	101
346848	0.154898	0.00476356	ND	0.000248282	5.27026	0.81635	0	1254	418
208873	0.143258	0.0469254	ND	0.0104306	2.75213	0.394265	0	225	75
361390	0.141899	4.55914e-07	ND	4.08297e-10	16.6713	2.36563	0	1170	390
361158	0.137137	0.00162528	ND	8.14229e-05	6.06527	0.831771	0	428	129
359764	0.133937	4.30776e-11	ND	4.53292e-16	23.7815	3.18522	0	471	157
318857	0.130475	9.01925e-11	ND	1.7053e-15	22.9761	2.9978	0	360	70
363088	0.128395	0.00629287	ND	0.000685641	4.60089	0.590731	0	377	103
172474	0.1277	8.42399e-09	ND	1.91323e-12	18.1752	2.32097	0	261	87			nucleosome assembly	GO:0006334	KOG1745	Histones H3 and H4	Chromatin structure and dynamics	INFORMATION STORAGE AND PROCESSING	IPR009072	Histone-fold
27455	0.126861	0.0102621	ND	0.00143174	4.09667	0.519709	0	225	75					KOG1396	Uncharacterized conserved protein	Function unknown	POORLY CHARACTERIZED	IPR012919	Sad1/UNC-like, C-terminal
345549	0.118514	3.39146e-10	ND	1.17869e-14	21.5679	2.55609	0	570	190
306074	0.116114	7.50536e-09	ND	4.18932e-12	17.593	2.04279	0	356	56			metabolic process	GO:0008152					IPR000583	Glutamine amidotransferase, class-II
191507	0.112624	0.00185809	ND	0.00014238	5.70942	0.643018	0	192	64
315939	0.112608	0.000354404	ND	1.77102e-05	7.07987	0.797253	0	451	53
344338	0.10655	3.29163e-17	ND	1.72387e-23	35.3508	3.76662	0	1152	384
161505	0.106395	0.0292496	ND	0.0091592	2.81004	0.298975	0	237	79					KOG0504	FOG: Ankyrin repeat	General function prediction only	POORLY CHARACTERIZED	IPR002110	Ankyrin
196476	0.0968294	0.0317352	ND	0.0112408	2.70696	0.262113	0	384	128
343672	0.0891191	2.54552e-06	ND	1.03151e-07	16.8036	1.49752	0	531	177
153723	0.0852671	1.09025e-08	ND	6.91665e-11	15.6418	1.33373	0	255	85
342373	0.0852294	0.0009505	ND	0.000146393	5.672	0.483421	0	462	154
346159	0.0845474	3.24172e-08	ND	3.03337e-10	14.6515	1.23875	0	1284	428
346238	0.0794432	5.07078e-07	ND	1.36495e-08	12.063	0.958326	0	774	258
340848	0.0789261	2.0148e-22	ND	1.87014e-28	42.9401	3.3891	0	471	157
60364	0.077859	0.00110537	ND	0.000215757	5.41586	0.421674	0	378	126									IPR009057	Homeodomain-like
349055	0.0727617	5.24321e-13	ND	1.76065e-15	47.2403	3.43729	0	1122	374
298065	0.0703744	2.09182e-16	ND	4.86618e-20	29.9482	2.10759	0	312	79
200726	0.0686418	0.0281033	ND	0.0131742	2.59577	0.178179	0	468	156
47557	0.0655761	3.30501e-08	ND	1.60571e-09	18.8942	1.23901	0	540	180
366492	0.0565009	1.16398e-08	ND	5.31135e-10	14.3257	0.809415	0	1101	367			catalytic activity	GO:0003824					IPR009003	Peptidase, trypsin-like serine and cysteine
278370	0.045724	1.22904e-05	ND	2.84058e-06	8.38441	0.383368	0	356	74
27163	0.0436947	9.78142e-13	ND	2.67755e-14	21.0109	0.918065	0	1014	338			ATPase activity, coupled to transmembrane movement of substances	GO:0042626	KOG0055	Multidrug/pheromone exporter, ABC superfamily	Secondary metabolites biosynthesis, transport and catabolism	METABOLISM	IPR011527	ABC transporter, transmembrane region, type 1
275954	0.0435759	1.26803e-12	ND	5.80347e-14	55.9289	2.43715	0	881	198
346574	0.0424871	0.0117977	ND	0.00678077	3.03222	0.12883	0	1743	581									IPR017853	Glycoside hydrolase, catalytic core
359369	0.028418	9.65908e-12	ND	1.2584e-12	18.4746	0.525012	0	1443	481			nutrient reservoir activity	GO:0045735					IPR011051	Cupin, RmlC-type
306531	0.0247169	0.00501492	ND	0.00348789	3.67095	0.0907345	0	364	54
348600	0.00353032	1.04319e-07	ND	1.06338e-07	155.133	0.547669	0	846	282			nucleic acid binding	GO:0003676					IPR012337	Polynucleotidyl transferase, Ribonuclease H fold
203642	4.69962	0.0076685	ND	0.0450208	1.76021	8.2723	0	483	161					KOG0817	Acyl-CoA-binding protein	Lipid transport and metabolism	METABOLISM	IPR002110	Ankyrin
327389	4.31896	0.0386244	ND	9.96572e-05	5.91835	25.5611	0	454	64
92807	4.29384	0.000471266	ND	0.000232516	5.31279	22.8123	0	159	53
312164	3.58502	4.84308e-07	ND	3.61121e-05	6.60917	23.694	0	401	133
314152	2.8278	0.00249601	ND	2.87313e-16	51.0989	144.498	0	793	125
154342	1.90565	0.0418587	ND	4.30774e-05	6.48509	12.3583	0	669	223			proteolysis	GO:0006508	KOG1216	von Willebrand factor and related coagulation proteins	Extracellular structures	CELLULAR PROCESSES AND SIGNALING	IPR000169	Peptidase, cysteine peptidase active site
324834	0.641574	0.00294151	ND	7.93411e-25	67.0188	42.9976	0	929	127
342563	0.562646	0.0196761	ND	7.59641e-15	21.8126	12.2728	0	423	141
92876	0.533996	0.0327792	ND	7.88554e-12	17.155	9.1607	0	219	73					KOG1827	Chromatin remodeling complex RSC, subunit RSC1/Polybromo and related proteins	Chromatin structure and dynamics	INFORMATION STORAGE AND PROCESSING	IPR001487	Bromodomain
327683	0.496899	0.00174465	ND	1.15313e-15	24.9769	12.411	0	337	52
363979	0.409574	0.0160906	ND	1.10481e-09	13.8026	5.65318	0	958	280
346134	0.377188	0.0123834	ND	3.72321e-07	9.73886	3.67338	0	627	209
314102	0.375328	0.00061853	ND	5.27522e-13	19.1416	7.18439	0	432	82
351499	0.37455	0.000113308	ND	2.14018e-27	41.1705	15.4204	0	1608	536			catalytic activity	GO:0003824					IPR009003	Peptidase, trypsin-like serine and cysteine
358345	0.368661	0.0173991	ND	5.39773e-05	98.7386	36.4011	0	1158	373			2-alkenal reductase activity	GO:0032440	KOG1196	Predicted NAD-dependent oxidoreductase	General function prediction only	POORLY CHARACTERIZED	IPR016040	NAD(P)-binding
331246	0.365385	0.0257351	ND	1.69748e-05	7.14811	2.61181	0	548	55
322505	0.358294	0.0429056	ND	0.000125439	5.75108	2.06057	0	610	83
340837	0.341754	0.0101098	ND	1.29784e-06	10.8504	3.70816	0	339	113
366195	0.337923	0.00484339	ND	2.70188e-07	10.6934	3.61353	0	694	227
308613	0.329669	0.00123626	ND	6.49062e-09	12.5698	4.14387	0	305	66
304458	0.316334	0.0381855	ND	0.00034172	5.78215	1.82909	0	435	67
318274	0.297489	0.0144896	ND	4.15197e-05	6.53757	1.94485	0	290	55
366906	0.295485	0.00131934	ND	9.82438e-08	10.6683	3.15232	0	479	135
228267	0.293667	0.021868	ND	0.000116377	5.83409	1.71328	0	186	62					KOG2324	Prolyl-tRNA synthetase	Translation, ribosomal structure and biogenesis	INFORMATION STORAGE AND PROCESSING
328806	0.292979	0.000472283	ND	9.20435e-09	12.3674	3.62338	0	441	66
114925	0.291172	0.00349745	ND	1.36996e-06	8.87583	2.58439	0	210	70									IPR002110	Ankyrin
338904	0.290908	0.000573914	ND	1.45123e-08	12.0543	3.50668	0	441	66
346364	0.29049	0.0127031	ND	2.90064e-05	6.74157	1.95836	0	504	168					KOG0302	Ribosome Assembly protein	General function prediction only	POORLY CHARACTERIZED	IPR011046	WD40 repeat-like
297308	0.289332	0.0355317	ND	0.000287504	5.16478	1.49434	0	982	232
328341	0.286861	0.00629088	ND	6.08509e-06	7.84789	2.25125	0	425	77
18750	0.286794	9.61303e-05	ND	2.81757e-11	16.2144	4.65019	0	189	63
342449	0.267626	0.00357517	ND	3.86459e-06	8.1358	2.17735	0	384	128
222144	0.267284	3.16269e-05	ND	1.39847e-24	36.8195	9.84126	0	324	108
348293	0.265213	0.0229685	ND	0.000280679	5.21516	1.38313	0	360	120
65179	0.264117	0.00557351	ND	1.25179e-05	7.35202	1.94179	0	261	87	2.7.7.6	DNA-directed RNA polymerase.	RNA polymerase activity	GO:0034062	KOG4392	RNA polymerase, subunit L	Transcription	INFORMATION STORAGE AND PROCESSING	IPR009025	DNA-directed RNA polymerase, RBP11-like
348295	0.250334	0.0247046	ND	0.000493862	4.82484	1.20782	0	360	120
157012	0.248231	0.0081624	ND	4.52969e-05	6.46858	1.6057	0	333	111					KOG2533	Permease of the major facilitator superfamily	Carbohydrate transport and metabolism	METABOLISM	IPR016196	MFS general substrate transporter
112275	0.247183	0.0475318	ND	0.00240557	3.76739	0.931235	0	267	89					KOG0504	FOG: Ankyrin repeat	General function prediction only	POORLY CHARACTERIZED	IPR002110	Ankyrin
345534	0.244422	4.27899e-05	ND	7.23073e-10	14.0061	3.4234	0	306	102
334101	0.237374	3.00708e-06	ND	4.79124e-13	19.0056	4.51143	0	243	81
19906	0.23657	0.000283388	ND	6.15901e-08	10.9641	2.59377	0	156	52
343358	0.234588	0.0225474	ND	0.00059257	4.68544	1.09915	0	663	221
196840	0.230431	0.00409644	ND	2.23637e-05	6.92614	1.596	0	168	56
318275	0.22873	0.00288114	ND	1.15989e-05	7.41853	1.69684	0	290	55
345377	0.218303	0.0375899	ND	0.00249322	3.73083	0.81445	0	900	300
12955	0.384988	0.0511389	ND	9.06723e-05	5.98781	2.30523	0	336	112					KOG4177	Ankyrin	Cell wall/membrane/envelope biogenesis	CELLULAR PROCESSES AND SIGNALING	IPR002110	Ankyrin
306722	0.368318	0.0573209	ND	0.00019455	5.46094	2.01136	0	593	92
343853	0.178047	0.0587458	ND	0.010374	2.75421	0.490378	0	555	185
353688	2.36061	0.0602003	ND	0.00168631	3.98123	9.39811	0	255	85
308757	0.472464	0.0611539	ND	3.81227e-15	2040.64	964.127	0	638	64
314646	0.294322	0.0614381	ND	0.00165144	3.98679	1.1734	0	394	100
319630	0.367686	0.0647837	ND	0.000282997	5.1983	1.91134	0	548	67
347783	0.169831	0.0653509	ND	0.0135618	2.55772	0.43438	0	588	196
324782	0.0826314	0.0715339	ND	0.0385592	1.86509	0.154115	0	411	55
202884	0.156516	0.0770963	ND	0.0201456	2.30022	0.360022	0	465	155
344281	0.372817	0.0807452	ND	0.000355266	5.03606	1.87753	0	735	245
307539	0.530738	0.0809055	ND	1.68952e-07	10.2799	5.45595	0	290	53
278372	0.248865	0.0809994	ND	0.00735358	2.96815	0.738671	0	768	188			zinc ion binding	GO:0008270					IPR015880	Zinc finger, C2H2-like
138829	0.470977	0.0865215	ND	2.91699e-07	9.94986	4.68616	0	270	90					KOG1721	FOG: Zn-finger	General function prediction only	POORLY CHARACTERIZED
358501	0.344032	0.0906375	ND	0.00155462	4.04406	1.39128	0	531	177									IPR010323	Protein of unknown function DUF924, bacterial
314243	3.90891	0.0918298	ND	0.00180306	3.92615	15.347	0	266	81
304589	2.6567	0.0957222	ND	0.0442731	1.76573	4.69103	0	749	191
365394	2.80373	0.100161	ND	0.00692748	3.0037	8.42157	0	570	155
347613	5.30861	0.107847	ND	0.0157524	2.46464	13.0838	0	687	229
324875	10.5337	0.108527	ND	0.012127	2.63071	27.7111	0	1186	157			viral infectious cycle	GO:0019058					IPR002592	Viral attachment sigma 1, reoviral
331944	0.31139	0.111956	ND	0.00554557	3.15386	0.982081	0	274	53
341055	0.140926	0.114925	ND	0.0455075	1.76412	0.248611	0	807	269
175711	2.64166	0.117333	ND	0.0133251	2.56786	6.78343	0	519	173
305476	17.7105	0.119566	ND	0.0019238	3.89927	69.0581	0	1072	232
351160	0.28569	0.131598	ND	0.0129233	2.58761	0.739255	0	1731	577					KOG4177	Ankyrin	Cell wall/membrane/envelope biogenesis	CELLULAR PROCESSES AND SIGNALING	IPR002110	Ankyrin
361217	0.21029	0.142583	ND	0.0357943	1.91225	0.402129	0	1092	349
308077	4.11705	0.14391	ND	0.000125439	5.79524	23.8593	0	591	171
322252	0.365184	0.150011	ND	0.00566588	3.15749	1.15307	0	609	114
308164	2.9371	0.150438	ND	0.000814922	4.48377	13.1693	0	705	175
364058	0.195784	0.153666	ND	0.0463635	1.73965	0.340595	0	711	237			ATP binding	GO:0005524	KOG0733	Nuclear AAA ATPase (VCP subfamily)	Posttranslational modification, protein turnover, chaperones	CELLULAR PROCESSES AND SIGNALING	IPR003960	AAA ATPase, conserved site
222199	3.1171	0.154676	ND	0.03993	1.84313	5.7452	0	360	120			hydrolase activity, acting on ester bonds	GO:0016788					IPR008947	Phospholipase C/P1 nuclease, core
346843	11.6627	0.161436	ND	0.0131283	2.58389	30.1352	0	954	318
341395	2.89625	0.162407	ND	0.0189363	2.34727	6.79827	0	447	149									IPR002332	P-II protein urydylation site
362779	0.392262	0.166978	ND	0.00446972	3.30211	1.29529	0	1788	596
226105	0.491623	0.167505	ND	0.000391697	4.95914	2.43803	0	195	65
126704	0.243862	0.170299	ND	0.0362695	1.90796	0.46528	0	582	194			hydrolase activity	GO:0016787	KOG3947	Phosphoesterases	General function prediction only	POORLY CHARACTERIZED	IPR004843	Metallophosphoesterase
311273	0.393095	0.173224	ND	0.00397552	3.41166	1.34111	0	257	78
346212	0.339404	0.17727	ND	0.0114564	2.68707	0.912001	0	471	157
339956	0.398057	0.18607	ND	0.00546599	3.17196	1.26262	0	296	55
363768	0.336326	0.203245	ND	0.018429	2.35657	0.792576	0	780	190
288621	4.17263	0.203509	ND	0.0239137	2.1849	9.11676	0	819	209	5.2.1.8	Peptidylprolyl isomerase.	cyclophilin-type peptidyl-prolyl cis-trans isomerase activity	GO:0042027	KOG0546	HSP90 co-chaperone CPR7/Cyclophilin	Posttranslational modification, protein turnover, chaperones	CELLULAR PROCESSES AND SIGNALING	IPR015891	Cyclophilin-like
74164	0.438459	0.214368	ND	0.00396186	3.3943	1.48826	0	345	115					KOG0504	FOG: Ankyrin repeat	General function prediction only	POORLY CHARACTERIZED	IPR002110	Ankyrin
348575	0.676786	0.216707	ND	2.73792e-11	22.555	15.2649	0	486	162
346428	0.303941	0.221007	ND	0.0328464	1.97085	0.599023	0	516	172
346977	0.363658	0.226803	ND	0.0185597	2.35286	0.855637	0	921	307
350107	0.697785	0.22781	ND	1.57943e-10	15.0232	10.483	0	945	315	3.5.1.-	In linear amides.	N-acetylgalactosamine-6-phosphate deacetylase activity	GO:0047419	KOG2682	NAD-dependent histone deacetylases and class I sirtuins (SIR2 family)	Chromatin structure and dynamics	INFORMATION STORAGE AND PROCESSING	IPR003000	NAD-dependent histone deacetylase, silent information regulator Sir2
354948	2.33063	0.230619	ND	0.0307382	2.01789	4.70296	0	582	194					KOG2401	Predicted MutS-related protein involved in mismatch repair	Replication, recombination and repair	INFORMATION STORAGE AND PROCESSING	IPR002625	Smr protein/MutS2 C-terminal
345621	1.72999	0.247437	ND	0.00491763	3.26607	5.65027	0	456	152
350886	1.68982	0.258286	ND	0.00403022	3.96292	6.6966	0	258	86
324195	6.88852	0.261667	ND	2.12955e-08	11.7393	80.8667	0	753	99
362821	1.75574	0.270501	ND	3.92498e-09	12.9172	22.6793	0	714	168			intracellular	GO:0005622	KOG1424	Predicted GTP-binding protein MMR1	General function prediction only	POORLY CHARACTERIZED	IPR005289	GTP-binding
50698	0.466931	0.279376	ND	0.00843998	2.88758	1.3483	0	498	166
337068	0.499739	0.294791	ND	0.00590575	3.1406	1.56948	0	789	63
171238	0.471007	0.29802	ND	0.00968765	2.79581	1.31684	0	234	78
317130	1.65858	0.306955	ND	1.56602e-11	16.6565	27.6262	0	290	53			proton-transporting two-sector ATPase complex	GO:0016469					IPR000194	ATPase, F1/V1/A1 complex, alpha/beta subunit, nucleotide-binding
217455	0.651404	0.317472	ND	6.70755e-06	7.80117	5.08171	0	243	81
329600	0.426755	0.323165	ND	0.0229439	2.20984	0.94306	0	246	61
347240	0.496673	0.324288	ND	0.00877807	2.85453	1.41777	0	816	272
363978	1.98349	0.328363	ND	1.52199e-05	7.22001	14.3208	0	691	141
336602	0.437566	0.350371	ND	0.0296754	2.04139	0.893245	0	294	52
311405	0.486499	0.356776	ND	0.0161472	2.44444	1.18922	0	153	51
144141	0.408365	0.359857	ND	0.0460321	1.75427	0.716381	0	417	139					KOG0505	Myosin phosphatase, regulatory subunit	Posttranslational modification, protein turnover, chaperones	CELLULAR PROCESSES AND SIGNALING	IPR002110	Ankyrin
309430	0.536887	0.366927	ND	0.00607176	3.12248	1.67642	0	288	52
216038	0.530601	0.366927	ND	0.00840324	2.88555	1.53108	0	222	74
348478	0.655586	0.377916	ND	5.0439e-05	6.3442	4.15917	0	1131	377
219740	0.422259	0.380237	ND	0.0459425	1.74052	0.73495	0	1284	428			calmodulin-dependent protein kinase activity	GO:0004683	KOG0615	Serine/threonine protein kinase Chk2 and related proteins	Cell cycle control, cell division, chromosome partitioning	METABOLISM	IPR011009	Protein kinase-like
306306	0.529756	0.380737	ND	0.00962019	2.77636	1.4708	0	629	129
344768	1.58315	0.384342	ND	1.26949e-06	8.93341	14.1429	0	483	161
358548	0.579796	0.403404	ND	0.00555896	3.16739	1.83644	0	384	92			protein binding	GO:0005515	KOG1434	Meiotic recombination protein Dmc1	Cell cycle control, cell division, chromosome partitioning	METABOLISM	IPR010995	DNA repair Rad51/transcription factor NusA, alpha-helical
352545	6.17156	0.418664	ND	0.0126799	2.61464	16.1364	0	534	178
344650	1.76204	0.42246	ND	0.0464112	1.74349	3.07208	0	1773	591
346148	0.689622	0.423012	ND	6.90572e-05	6.18095	4.26252	0	810	270
341951	0.524418	0.463335	ND	0.0315996	2.00851	1.0533	0	330	110
322984	1.73183	0.478487	ND	0.0037319	3.44804	5.97141	0	1263	309
338928	1.60175	0.484475	ND	0.00182885	3.93246	6.29881	0	820	110
156807	0.639429	0.498461	ND	6.30879e-09	12.5529	8.02669	0	222	74
307260	0.598683	0.520835	ND	0.0203013	2.28709	1.36924	0	383	62
346257	1.6122	0.521253	ND	0.046006	1.73503	2.79721	0	1626	542	3.6.1.3	Adenosinetriphosphatase.	ATPase activity, coupled to transmembrane movement of substances	GO:0042626	KOG0733	Nuclear AAA ATPase (VCP subfamily)	Posttranslational modification, protein turnover, chaperones	CELLULAR PROCESSES AND SIGNALING	IPR003593	AAA+ ATPase, core
340495	0.60569	0.563491	ND	0.0334043	1.96289	1.1889	0	822	274
312412	0.769361	0.567609	ND	1.63454e-05	7.14478	5.49692	0	286	52
335867	1.37801	0.569704	ND	4.13999e-05	6.55496	9.03282	0	403	77
212124	0.720729	0.600628	ND	0.00374784	3.44384	2.48208	0	516	172			endoribonuclease activity	GO:0004521	KOG1642	Ribonuclease, T2 family	RNA processing and modification	INFORMATION STORAGE AND PROCESSING	IPR001568	Ribonuclease T2
360619	1.46867	0.601939	ND	0.0421523	1.80505	2.65102	0	988	239			metal ion binding	GO:0046872					IPR000585	Hemopexin
365098	1.43743	0.605005	ND	0.0353754	1.92202	2.76277	0	624	151
343562	1.51384	0.611998	ND	1.80174e-05	7.04909	10.6712	0	459	153
68813	0.669887	0.619033	ND	0.0185344	2.34071	1.56801	0	411	137											AA11	Lytic polysaccharide monooxygenase
362374	1.3914	0.61993	ND	0.0123694	2.61144	3.63354	0	888	247
351497	1.23905	0.624414	ND	9.98071e-05	5.9052	7.31684	0	585	195			phosphorylation	GO:0016310	KOG2833	Mevalonate pyrophosphate decarboxylase	Lipid transport and metabolism	METABOLISM	IPR006204	GHMP kinase
343054	1.32855	0.626069	ND	0.0062784	3.08875	4.10357	0	735	245			proteolysis	GO:0006508					IPR000169	Peptidase, cysteine peptidase active site
358879	0.688858	0.639962	ND	0.0226761	2.21258	1.52415	0	903	238			nucleotide binding	GO:0000166					IPR010978	tRNA-binding arm
329129	0.763184	0.642232	ND	0.000749532	4.51105	3.44277	0	336	51
210137	1.40512	0.658126	ND	0.00265418	3.64131	5.11646	0	363	121			carbon-nitrogen ligase activity, with glutamine as amido-N-donor	GO:0016884	KOG1212	Amidases	Lipid transport and metabolism	METABOLISM	IPR000120	Amidase signature enzyme
341941	1.42013	0.66051	ND	0.034822	1.93691	2.75066	0	495	165
337288	0.788119	0.662203	ND	0.000518392	4.7986	3.78187	0	421	67
335100	0.68062	0.665969	ND	0.039269	1.85049	1.25948	0	300	55
343430	0.770967	0.681819	ND	0.00357069	3.47427	2.67855	0	639	213			DNA binding	GO:0003677					IPR009057	Homeodomain-like
165221	0.733686	0.69982	ND	0.0157524	2.47369	1.81491	0	234	78
25082	1.10826	0.714112	ND	2.19566e-18	27.3988	30.3649	0	162	54
364824	0.726348	0.719404	ND	0.049297	1.69972	1.23459	0	444	146
26153	0.799561	0.742775	ND	1.23059e-05	7.37289	5.89508	0	243	81
309474	1.32867	0.744161	ND	0.0347618	1.91649	2.54638	0	234	63
305473	1.27574	0.749157	ND	0.0156165	2.47159	3.1531	0	672	72
317676	1.30982	0.751708	ND	0.0347618	1.92463	2.52091	0	744	66
331362	0.785621	0.76326	ND	0.0189988	2.31346	1.8175	0	589	171			metal ion transmembrane transporter activity	GO:0046873					IPR002523	Mg2+ transporter protein, CorA-like
13280	1.15077	0.772623	ND	3.86071e-31	46.9484	54.027	0	162	54			zinc ion binding	GO:0008270	KOG1973	Chromatin remodeling protein, contains PHD Zn-finger	Chromatin structure and dynamics	INFORMATION STORAGE AND PROCESSING	IPR011011	Zinc finger, FYVE/PHD-type
155946	0.880183	0.777139	ND	2.40476e-10	14.8399	13.0619	0	165	55					KOG3182	Predicted cation transporter	Inorganic ion transport and metabolism	METABOLISM	IPR006840	ChaC-like protein
220841	1.23876	0.784183	ND	0.0152143	2.47619	3.06741	0	342	114
341353	0.867299	0.789973	ND	6.08043e-15	22.0254	19.1026	0	378	126
343545	0.808111	0.816213	ND	0.0378967	1.87484	1.51508	0	753	251					KOG0927	Predicted transporter (ABC superfamily)	General function prediction only	POORLY CHARACTERIZED
364617	1.11204	0.843876	ND	0.00147653	4.03852	4.49101	0	564	151
194875	0.928718	0.853671	ND	4.41126e-07	9.609	8.92405	0	174	58
285320	1.09603	0.881543	ND	3.41334e-06	8.21848	9.00767	0	2177	596			helicase activity	GO:0004386	KOG0335	ATP-dependent RNA helicase	RNA processing and modification	INFORMATION STORAGE AND PROCESSING	IPR000629	RNA helicase, ATP-dependent, DEAD-box, conserved site
307820	1.14463	0.886999	ND	0.0378941	1.86156	2.13079	0	269	89
346825	0.881571	0.888965	ND	0.0359808	1.8965	1.6719	0	744	248
208906	0.940001	0.908001	ND	4.27055e-06	8.1141	7.62727	0	240	80
343678	0.916407	0.908228	ND	0.0151958	2.49297	2.28458	0	525	175
340051	0.927245	0.920205	ND	0.00777754	2.94202	2.72798	0	870	290					KOG1424	Predicted GTP-binding protein MMR1	General function prediction only	POORLY CHARACTERIZED
348892	1.09201	0.942364	ND	0.0489782	1.6988	1.8551	0	525	175
365183	1.05081	0.94605	ND	4.1794e-13	19.1021	20.0726	0	1122	345			zinc ion binding	GO:0008270					IPR001841	Zinc finger, RING-type
306427	1.04866	0.946263	ND	0.0492458	1.71117	1.79444	0	392	59
27492	0.971958	0.947209	ND	3.1276e-24	36.3887	35.3682	0	159	53
306106	1.09301	0.951484	ND	0.000241028	49.5843	54.1961	0	312	75
156257	1.03828	0.962309	ND	0.00102238	4.3323	4.49813	0	207	69
200467	0.970093	0.964895	ND	0.0276162	2.09112	2.02858	0	453	151					KOG1840	Kinesin light chain	Cytoskeleton	CELLULAR PROCESSES AND SIGNALING
361478	0.999491	1	ND	4.72545e-05	6.43767	6.43439	0	541	163
229136	0.0019389	8.20819e-20	0.000526322	7.26152e-20	2696.06	5.22738	1.41899	390	130													x	x
362829	0.0529431	9.88174e-05	0.00106005	3.7542e-05	136.301	7.21621	0.144486	762	254
365854	0.0552915	0.00202448	0.00113757	0.00100138	265.743	14.6933	0.302302	1214	350	1.6.5.5	NADPH:quinone reductase.	NADPH:quinone reductase activity	GO:0003960	KOG1198	Zinc-binding oxidoreductase	General function prediction only	POORLY CHARACTERIZED	IPR016040	NAD(P)-binding
204841	0.65233	0.00136096	0.00122656	2.2948e-117	1036.2	675.943	1.27096	1812	604	3.2.1.18	Exo-alpha-sialidase.	exo-alpha-sialidase activity	GO:0004308	KOG2806	Chitinase	Carbohydrate transport and metabolism	METABOLISM	IPR001138	Fungal transcriptional regulatory protein, N-terminal
191942	0.0498545	2.17838e-08	0.00131412	2.74949e-09	579.975	28.9144	0.762155	1359	453	2.1.1.79	Cyclopropane-fatty-acyl-phospholipid synthase.	cyclopropane-fatty-acyl-phospholipid synthase activity	GO:0008825	KOG1269	SAM-dependent methyltransferases	General function prediction only	POORLY CHARACTERIZED	IPR003333	Cyclopropane-fatty-acyl-phospholipid synthase
335683	0.446714	0.0498142	0.00229788	1.32357e-06	97.5823	43.5914	0.224233	491	137
296866	0.566327	0.319618	0.00304814	0.00048306	67.2364	38.0778	0.204946	1936	469					KOG4157	beta-1,6-N-acetylglucosaminyltransferase, contains WSC domain	Carbohydrate transport and metabolism	METABOLISM	IPR002889	Carbohydrate-binding WSC			x
319110	0.421892	0.0900334	0.00312067	8.56817e-06	16796	7086.12	52.4149	351	117					KOG0710	Molecular chaperone (small heat-shock protein Hsp26/Hsp42)	Posttranslational modification, protein turnover, chaperones	CELLULAR PROCESSES AND SIGNALING	IPR008978	HSP20-like chaperone
360023	1.33644	0.703746	0.00330392	3.57759e-05	492.567	658.287	1.6274	1888	625
341498	0.333517	0.00189726	0.00347771	1.8316e-09	13.6309	4.54615	0.0474044	930	310
365301	0.361171	0.00115356	0.00352734	9.06371e-10	14.0979	5.09176	0.0497282	738	246
199926	1.0843	0.968136	0.00356282	0	1322.64	1434.13	4.71231	570	190
221613	1.36996	0.686109	0.00365267	3.78517e-14	73.1488	100.211	0.267188	165	55
327603	0.0179898	6.29333e-11	0.00432456	3.96909e-11	510.551	9.18471	2.20791	829	119													x	x
361505	0.343842	1.90519e-12	0.00435378	2.26937e-36	55.9462	19.2367	0.243577	1509	397	5.3.1.4	L-arabinose isomerase.	L-arabinose isomerase activity	GO:0008733	KOG0569	Permease of the major facilitator superfamily	Carbohydrate transport and metabolism	METABOLISM	IPR016196	MFS general substrate transporter
188420	0.00124989	5.13049e-30	0.00443985	6.76931e-30	1160.12	1.45002	5.15074	531	177			chitin binding	GO:0008061					IPR001002	Chitin-binding, type 1			x	x
330311	3.40388	0.296954	0.00457725	0.0164849	4081.28	13892.2	18.681	1032	195									IPR008978	HSP20-like chaperone
45623	0.0176626	5.74783e-24	0.00462062	7.30795e-25	38.934	0.687675	0.179899	408	136
279020	0.0593483	1.20887e-56	0.00488764	3.15676e-79	123	7.29982	0.601177	1841	516			regulation of transcription, DNA-dependent	GO:0006355	KOG0528	HMG-box transcription factor SOX5	Transcription	INFORMATION STORAGE AND PROCESSING	IPR009071	High mobility group box, HMG
360565	0.0382375	2.67996e-14	0.0050102	3.03397e-15	740.057	28.2979	3.70783	1187	339	1.1.1.215	Gluconate 2-dehydrogenase.	gluconate dehydrogenase activity	GO:0008875	KOG0069	Glyoxylate/hydroxypyruvate reductase (D-isomer-specific 2-hydroxy acid dehydrogenase superfamily)	Energy production and conversion	METABOLISM	IPR016040	NAD(P)-binding
285213	0.0229506	7.91567e-29	0.00533046	2.469e-30	46.7676	1.07335	0.249293	2061	687			nucleoside-triphosphatase activity	GO:0017111	KOG0055	Multidrug/pheromone exporter, ABC superfamily	Secondary metabolites biosynthesis, transport and catabolism	METABOLISM	IPR011527	ABC transporter, transmembrane region, type 1
289012	0.0699211	0.00559476	0.00538286	0.00279459	184.301	12.8865	0.992066	1633	393			metabolic process	GO:0008152	KOG2741	Dimeric dihydrodiol dehydrogenase	Secondary metabolites biosynthesis, transport and catabolism	METABOLISM	IPR016040	NAD(P)-binding
109027	0.754898	0.525933	0.00540473	9.45788e-27	41.0669	31.0013	0.221956	276	92			zinc ion binding	GO:0008270	KOG3710	EGL-Nine (EGLN) protein	Signal transduction mechanisms	CELLULAR PROCESSES AND SIGNALING	IPR002893	Zinc finger, MYND-type
299570	0.00963583	2.06298e-30	0.00583637	9.54588e-31	3630.75	34.9853	21.1904	1427	350	1.1.1.1	Alcohol dehydrogenase.	alcohol dehydrogenase activity, iron-dependent	GO:0004025	KOG0023	Alcohol dehydrogenase, class V	Secondary metabolites biosynthesis, transport and catabolism	METABOLISM	IPR016040	NAD(P)-binding
308908	0.125936	7.67794e-15	0.00651279	1.89196e-22	445.703	56.1302	2.90277	511	78
367266	0.597464	0.293977	0.00700348	0.00023769	5.46906	3.26756	0.0383024	1151	272					KOG0825	PHD Zn-finger protein	General function prediction only	POORLY CHARACTERIZED
189165	0.0339394	1.61546e-05	0.00713557	9.7825e-06	175.742	5.96457	1.25402	855	285					KOG1216	von Willebrand factor and related coagulation proteins	Extracellular structures	CELLULAR PROCESSES AND SIGNALING
353268	0.105022	0.0264915	0.00715395	0.012127	782.248	82.1534	5.59616	660	220			FMN binding	GO:0010181					IPR009002	FMN-binding split barrel, related
321618	0.133545	1.54846e-87	0.00768466	1.326e-153	255.489	34.1193	1.96335	247	54
209427	0.0463467	0.000147094	0.00770359	5.83087e-05	6.51058	0.301744	0.0501548	879	293
328984	2.00151	0.00124556	0.00782558	1.00751e-16	25.6072	51.2532	0.200391	220	51
366222	0.657038	0.142742	0.00818969	7.81507e-12	17.7661	11.673	0.145499	606	202
353423	2.68442	0.0312991	0.00823531	8.03983e-50	78.7467	211.39	0.648504	1245	415			metabolic process	GO:0008152	KOG1329	Phospholipase D1	Lipid transport and metabolism	METABOLISM	IPR001736	Phospholipase D/Transphosphatidylase
353377	0.404729	0.13756	0.00872946	0.00223191	3.9117	1.58318	0.034147	1794	598	3.6.1.3	Adenosinetriphosphatase.	ATPase activity, coupled to transmembrane movement of substances	GO:0042626	KOG0733	Nuclear AAA ATPase (VCP subfamily)	Posttranslational modification, protein turnover, chaperones	CELLULAR PROCESSES AND SIGNALING	IPR003960	AAA ATPase, conserved site
310618	0.0198514	2.97569e-08	0.00889021	2.50474e-08	492.376	9.77435	4.37733	549	71
361990	2.90925	0.228352	0.00913762	0.00035578	5.24226	15.251	0.0479018	2045	580	1.14.-.-	Acting on paired donors, with incorporation or reduction of	spheroidene monooxygenase activity	GO:0043823	KOG0159	Cytochrome P450 CYP11/CYP12/CYP24/CYP27 subfamilies	Secondary metabolites biosynthesis, transport and catabolism	METABOLISM	IPR001128	Cytochrome P450
231997	0.548972	0.0344131	0.00914123	4.95056e-09	23.2984	12.7902	0.212976	207	69													x	x
325334	0.588672	0.000841888	0.00918627	9.09149e-19	16999.6	10007.2	156.163	226	75
340393	0.0116692	1.45544e-53	0.00930763	9.18185e-54	301.753	3.52121	2.80861	519	173
223557	5.68992	0.114583	0.00940664	0.00106771	2884.88	16414.7	27.137	408	136					KOG0710	Molecular chaperone (small heat-shock protein Hsp26/Hsp42)	Posttranslational modification, protein turnover, chaperones	CELLULAR PROCESSES AND SIGNALING	IPR008978	HSP20-like chaperone
321615	0.141359	6.82459e-51	0.0096726	3.75053e-84	258.339	36.5185	2.49881	247	54
353599	0.160606	0.00138415	0.0100745	7.23413e-05	28.2687	4.54013	0.284794	774	258
345848	0.326768	1.46499e-07	0.0101949	1.5254e-19	30.2401	9.88147	0.308294	429	143			metal ion binding	GO:0046872					IPR001424	Superoxide dismutase, copper/zinc binding			x	x
350697	0.0494477	2.26203e-05	0.0103863	1.06266e-05	179.668	8.88416	1.86608	189	63
108032	0.412282	0.00441122	0.0106418	1.00099e-10	15.9903	6.59252	0.170166	360	120					KOG4177	Ankyrin	Cell wall/membrane/envelope biogenesis	CELLULAR PROCESSES AND SIGNALING	IPR002110	Ankyrin
351692	0.0489358	4.84543e-09	0.0109272	8.32163e-10	17.0954	0.836575	0.186805	1416	472
331797	0.102777	1.03504e-22	0.0109844	7.15235e-29	99.3443	10.2103	1.09124	404	54
348457	2.70021	0.0123457	0.0111447	0.00554781	3.29628	8.90065	0.0367362	999	333
85315	0.448329	2.52795e-07	0.0121607	1.40112e-29	47.3893	21.246	0.576289	153	51			zinc ion binding	GO:0008270	KOG1811	Predicted Zn2+-binding protein, contains FYVE domain	General function prediction only	POORLY CHARACTERIZED	IPR011011	Zinc finger, FYVE/PHD-type
351250	0.00821281	4.67155e-12	0.0122651	7.79021e-12	199.328	1.63704	2.44477	1068	356	4.2.1.1	Carbonate dehydratase.	zinc ion binding	GO:0008270	KOG0382	Carbonic anhydrase	General function prediction only	POORLY CHARACTERIZED	IPR001148	Carbonic anhydrase, eukaryotic			x
292432	0.116578	1.78953e-30	0.0125055	1.3175e-43	286.526	33.4026	3.58314	1275	388
312681	0.310079	1.52707e-09	0.0128514	5.84557e-46	73.2757	22.7212	0.941693	1717	493			nucleoside-triphosphatase activity	GO:0017111					IPR003593	AAA+ ATPase, core
174001	0.544538	0.00177971	0.0129285	5.55966e-23	36.224	19.7254	0.468322	345	115					KOG4369	RTK signaling protein MASK/UNC-44	Signal transduction mechanisms	CELLULAR PROCESSES AND SIGNALING	IPR002110	Ankyrin
353597	0.670417	0.235133	0.0129289	4.064e-181	1769.6	1186.37	22.879	1548	516	1.14.14.1	Unspecific monooxygenase.	unspecific monooxygenase activity	GO:0050381	KOG0158	Cytochrome P450 CYP3/CYP5/CYP6/CYP9 subfamilies	Secondary metabolites biosynthesis, transport and catabolism	METABOLISM	IPR001128	Cytochrome P450
345965	0.00662764	9.55837e-50	0.0129607	3.65794e-49	1081.26	7.16619	14.0139	819	273
63194	0.6702	0.0488156	0.0137032	1.09888e-14	31.5413	21.139	0.432217	204	68
329329	1.22701	0.0514929	0.0137176	5.00271e-41	674.468	827.576	9.25205	265	54
307017	0.883457	0.612891	0.0138185	9.49619e-14	21.2691	18.7903	0.293907	150	50
186271	3.9327	0.0182966	0.0139246	6.23804e-11	16.5936	65.2575	0.231059	954	318	1.5.1.2	Pyrroline-5-carboxylate reductase.	metabolic process	GO:0008152	KOG3124	Pyrroline-5-carboxylate reductase	Amino acid transport and metabolism	METABOLISM	IPR016040	NAD(P)-binding
307549	0.904377	0.790942	0.0139965	4.05658e-19	30.1847	27.2983	0.422481	290	96
314957	0.150195	6.44553e-05	0.01425	7.58332e-07	9.82145	1.47513	0.139956	315	64
361820	0.35199	1.67033e-05	0.0146509	4.89464e-16	26.2231	9.23025	0.384193	1377	343					KOG1840	Kinesin light chain	Cytoskeleton	CELLULAR PROCESSES AND SIGNALING
341596	0.196525	0.135101	0.0149467	0.0419019	1.92403	0.37812	0.0287581	1533	511					KOG1924	RhoA GTPase effector DIA/Diaphanous	Cytoskeleton	CELLULAR PROCESSES AND SIGNALING
78156	0.168517	1.42054e-27	0.0150476	7.75921e-58	100.532	16.9412	1.51276	204	68					KOG3348	BolA (bacterial stress-induced morphogen)-related protein	Signal transduction mechanisms	CELLULAR PROCESSES AND SIGNALING	IPR002634	BolA-like protein
327215	0.946154	0.910862	0.0150605	1.23588e-10	16.2225	15.349	0.244319	1624	327
343897	0.127596	2.53856e-14	0.0151255	1.14455e-21	34.8145	4.4422	0.526588	1047	349
352963	0.592238	0.333119	0.0153318	0.000536644	5.04468	2.98765	0.077344	2280	760			proteolysis	GO:0006508	KOG1153	Subtilisin-related protease/Vacuolar protease B	Posttranslational modification, protein turnover, chaperones	CELLULAR PROCESSES AND SIGNALING	IPR000209	Peptidase S8 and S53, subtilisin, kexin, sedolisin
170056	0.0140534	1.55009e-07	0.0153627	1.97699e-07	445.094	6.25509	6.83786	2694	898
364509	0.817029	0.570022	0.0160087	5.33563e-11	16.759	13.6926	0.268291	1370	235
363496	0.317401	0.0155562	0.0160631	4.29212e-05	6.90886	2.19288	0.110978	552	184
352197	1.79894	0.491769	0.0161942	0.0482756	1.80719	3.25102	0.0292659	1254	418	2.4.1.142	Chitobiosyldiphosphodolichol alpha-mannosyltransferase.	chitobiosyldiphosphodolichol beta-mannosyltransferase activity	GO:0004578	KOG2941	Beta-1,4-mannosyltransferase	Posttranslational modification, protein turnover, chaperones	CELLULAR PROCESSES AND SIGNALING	IPR000577	Carbohydrate kinase, FGGY	GT33	Glycosyltransferase Family 33 protein
342361	0.180934	5.88418e-08	0.0163932	8.45817e-14	21.5336	3.89617	0.353006	1110	370					KOG2266	Chromatin-associated protein Dek and related proteins, contains SAP DNA binding domain	Chromatin structure and dynamics	INFORMATION STORAGE AND PROCESSING
338601	0.84567	0.690211	0.0168503	5.20238e-09	366.038	309.547	6.16783	870	148
348474	0.193238	0.00241918	0.0170814	5.02981e-05	6.80089	1.31419	0.116169	1518	506					KOG0584	Serine/threonine protein kinase	General function prediction only	POORLY CHARACTERIZED
311819	0.0965102	4.15614e-06	0.0170888	6.17655e-07	174.114	16.8037	2.9754	377	68
340312	0.131469	9.2509e-35	0.0175166	1.7923e-108	177.019	23.2725	3.10077	2157	719			serine-type peptidase activity	GO:0008236	KOG2100	Dipeptidyl aminopeptidase	Posttranslational modification, protein turnover, chaperones	CELLULAR PROCESSES AND SIGNALING	IPR001375	Peptidase S9, prolyl oligopeptidase active site region			x
321448	0.276095	4.13338e-06	0.0183477	8.68808e-11	200.981	55.4899	3.68755	251	83
193382	0.00675262	1.48562e-34	0.0185743	1.16395e-33	945.85	6.38697	17.5685	864	288					KOG0658	Glycogen synthase kinase-3	Carbohydrate transport and metabolism	METABOLISM
366867	0.0371742	1.42583e-13	0.0187245	5.61309e-14	22.1412	0.823079	0.414583	3066	1022
341178	0.801251	0.632589	0.0187477	2.98346e-10	15.7776	12.6418	0.295793	1737	579			binding	GO:0005488					IPR016024	Armadillo-type fold
176413	0.974692	0.944573	0.0196028	1.50239e-08	12.8603	12.5348	0.252098	243	81
352263	0.471965	0.0132873	0.0196293	7.41112e-11	71.6787	33.8298	1.407	282	94
292413	0.0229281	4.46451e-07	0.0196642	5.0542e-07	1076.23	24.6759	21.1633	629	133
349967	0.318963	0.0996839	0.0200322	0.00524935	3.47672	1.10894	0.0696463	633	211
343671	0.0638204	8.76356e-09	0.0200665	1.36497e-09	19.6893	1.25658	0.395096	1110	370			oxidoreductase activity	GO:0016491	KOG2614	Kynurenine 3-monooxygenase and related flavoprotein monooxygenases	General function prediction only	POORLY CHARACTERIZED	IPR003042	Aromatic-ring hydroxylase
141433	0.330457	0.00923171	0.0200686	3.66391e-06	8.84787	2.92384	0.177564	345	115					KOG3346	Phosphatidylethanolamine binding protein	General function prediction only	POORLY CHARACTERIZED	IPR008914	Phosphatidylethanolamine-binding protein PEBP
80828	0.617632	0.2823	0.0203774	6.80086e-09	13.5417	8.3638	0.275945	222	74					KOG0504	FOG: Ankyrin repeat	General function prediction only	POORLY CHARACTERIZED	IPR002110	Ankyrin
291074	0.225102	4.13721e-08	0.0204472	2.6755e-12	281.026	63.2596	5.74619	483	98
353913	0.0968601	4.57736e-09	0.0207325	6.0154e-11	17.1149	1.65775	0.354834	1767	589	1.11.1.6	Catalase.	response to oxidative stress	GO:0006979	KOG0047	Catalase	Inorganic ion transport and metabolism	METABOLISM	IPR011614	Catalase, N-terminal
230452	0.0938735	8.8384e-150	0.0208618	1.8193e-200	516.611	48.4961	10.7774	210	70
345216	0.0641266	0.00148987	0.0209181	0.000756413	4.91273	0.315036	0.102765	429	143			carbon utilization	GO:0015976					IPR001765	Carbonic anhydrase
350106	0.230023	0.0029327	0.0211816	2.45132e-05	7.46	1.71597	0.158015	279	93			zinc ion binding	GO:0008270					IPR001841	Zinc finger, RING-type
283414	0.0306783	0.000755735	0.0219262	0.000726197	97.2804	2.98439	2.13299	1578	467	3.4.11.-	Aminopeptidases.	alanine aminopeptidase activity	GO:0016284	KOG2195	Transferrin receptor and related proteins containing the protease-associated (PA) domain	General function prediction only	POORLY CHARACTERIZED	IPR007484	Peptidase M28			x
290712	0.17168	9.41186e-08	0.0223294	1.96683e-11	18.0857	3.10495	0.403842	655	55
329118	0.063305	4.63091e-12	0.0226223	4.89196e-13	41.1621	2.60576	0.931182	723	152
276728	1.17911	0.753152	0.0227291	1.59918e-09	14.6786	17.3077	0.333631	1320	277
345076	0.0190213	4.14324e-06	0.0229142	6.50235e-06	25.1498	0.478382	0.576289	459	153
315651	1.24542	0.741696	0.023054	2.59098e-06	8282.74	10315.5	190.951	495	102			response to stress	GO:0006950					IPR007250	Heat shock protein 9/12
231979	0.699798	0.334595	0.0231942	1.81121e-11	18.3646	12.8515	0.425953	207	69													x	x
191907	1.79055	0.0551307	0.023814	4.83869e-16	26.796	47.9797	0.638122	192	64					KOG3263	Nucleic acid binding protein	General function prediction only	POORLY CHARACTERIZED	IPR013957	Protein of unknown function DUF1777
361299	0.0294146	5.78996e-18	0.0244437	6.80037e-18	359.965	10.5882	8.79887	1049	201
327006	0.0527302	8.4805e-125	0.0247291	3.3564e-150	11053.6	582.858	273.345	820	156
339748	0.667213	0.298699	0.0250584	8.46572e-06	8.32135	5.55211	0.208519	352	72
328056	0.383643	4.40381e-05	0.0252663	2.21554e-24	40.9543	15.7119	1.03477	272	64
365570	0.104296	2.84579e-05	0.025282	4.31211e-06	20.1204	2.09849	0.508686	260	66													x	x
276751	1.36966	0.648952	0.0265541	0.0238851	2.42017	3.31481	0.0642654	2058	686					KOG1812	Predicted E3 ubiquitin ligase	Posttranslational modification, protein turnover, chaperones	CELLULAR PROCESSES AND SIGNALING	IPR003892	Ubiquitin system component Cue
354336	0.986436	0.930772	0.0266295	1.66036e-48	378.548	373.413	10.0806	156	52
290245	1.57801	0.535378	0.0270004	0.00125454	4.64609	7.33159	0.125447	1465	315	5.3.1.4	L-arabinose isomerase.	L-arabinose isomerase activity	GO:0008733	KOG0569	Permease of the major facilitator superfamily	Carbohydrate transport and metabolism	METABOLISM	IPR016196	MFS general substrate transporter
362845	0.0576433	7.51994e-23	0.0270612	1.44698e-24	41.0354	2.36542	1.11047	1092	364
329686	7.68037	0.355934	0.0272853	3.56949e-29	49.4747	379.984	1.34993	1619	399
46755	0.035849	2.19458e-13	0.0274197	5.58057e-13	21.7274	0.778906	0.595758	666	222
364614	0.70707	0.221324	0.0275558	4.98422e-39	67.0106	47.3812	1.84653	529	175
342229	0.207461	2.4168e-09	0.028134	2.61254e-22	41.1288	8.53263	1.15712	762	254					KOG1187	Serine/threonine protein kinase	Signal transduction mechanisms	CELLULAR PROCESSES AND SIGNALING
283866	0.272472	1.33887e-05	0.0287562	9.94987e-29	48.338	13.1708	1.39002	1434	478			integral to membrane	GO:0016021	KOG0253	Synaptic vesicle transporter SV2 (major facilitator superfamily)	General function prediction only	POORLY CHARACTERIZED	IPR016196	MFS general substrate transporter
292354	5.53697	1.11151e-05	0.0290909	7.34265e-05	91.1002	504.418	2.65018	1513	314			membrane	GO:0016020					IPR001425	Rhodopsin, bacterial
76364	0.545238	0.0768753	0.0292163	7.81034e-07	10.3708	5.65458	0.302997	291	97					KOG0502	Integral membrane ankyrin-repeat protein Kidins220 (protein kinase D substrate)	General function prediction only	POORLY CHARACTERIZED	IPR002110	Ankyrin
279868	2.12145	0.661056	0.0294291	1.12509e-29	357.822	759.101	10.5304	2138	578	4.1.-.-	Carbon-carbon lyases.	magnesium ion binding	GO:0000287	KOG1185	Thiamine pyrophosphate-requiring enzyme	Coenzyme transport and metabolism	METABOLISM	IPR012001	Thiamine pyrophosphate enzyme, N-terminal TPP binding region
273789	0.0325236	7.51677e-54	0.0296134	1.21304e-53	127.027	4.13136	3.76168	1521	496			integral to membrane	GO:0016021	KOG0255	Synaptic vesicle transporter SVOP and related transporters (major facilitator superfamily)	General function prediction only	POORLY CHARACTERIZED	IPR016196	MFS general substrate transporter
338609	1.3559	0.59296	0.0297893	1.54101e-10	17.3294	23.4969	0.516231	427	106
356689	0.0990321	1.29795e-12	0.0299523	5.83e-15	24.7455	2.4506	0.741183	3121	1034			dynamin GTPase activity	GO:0008549	KOG0446	Vacuolar sorting protein VPS1, dynamin, and related proteins	General function prediction only	POORLY CHARACTERIZED	IPR001401	Dynamin, GTPase region
200863	0.0260545	6.33269e-10	0.0300174	1.42425e-09	21.196	0.552252	0.636249	5697	1899	3.2.1.18	Exo-alpha-sialidase.	exo-alpha-sialidase activity	GO:0004308	KOG4157	beta-1,6-N-acetylglucosaminyltransferase, contains WSC domain	Carbohydrate transport and metabolism	METABOLISM	IPR011047	Quinonprotein alcohol dehydrogenase-like
343958	0.711457	0.586449	0.0300224	9.62675e-08	45.8235	32.6015	1.37573	1002	334			integral to membrane	GO:0016021					IPR000005	Helix-turn-helix, AraC type
71469	3.15692	0.380265	0.0302732	5.45386e-23	85.6128	270.273	2.59177	153	51
292915	0.0283602	2.4235e-301	0.0303981	2.0217e-293	507.754	14.4	15.4348	425	121			integral to membrane	GO:0016021	KOG3348	BolA (bacterial stress-induced morphogen)-related protein	Signal transduction mechanisms	CELLULAR PROCESSES AND SIGNALING	IPR002634	BolA-like protein
322691	0.102759	1.50184e-09	0.0305491	4.98573e-11	18.3838	1.88909	0.561606	471	62
282772	0.0653559	3.75887e-54	0.0305705	6.59837e-67	324.988	21.2399	9.93504	1748	455					KOG4177	Ankyrin	Cell wall/membrane/envelope biogenesis	CELLULAR PROCESSES AND SIGNALING	IPR002110	Ankyrin
136669	0.217506	5.19205e-09	0.0306574	1.7654e-16	29.3854	6.39149	0.900878	204	68					KOG3014	Protein involved in establishing cohesion between sister chromatids during DNA replication	Replication, recombination and repair	INFORMATION STORAGE AND PROCESSING	IPR016181	Acyl-CoA N-acyltransferase
316474	0.0707547	7.30014e-89	0.0310351	1.1273e-141	243.532	17.231	7.55805	970	161
273229	0.0110241	3.20133e-06	0.0313098	6.91346e-06	97.0663	1.07007	3.03913	1236	412									IPR008985	Concanavalin A-like lectin/glucanase
351166	0.855311	0.865222	0.0318706	0.0252548	2.43322	2.08116	0.0775481	1137	379			metabolic process	GO:0008152					IPR016040	NAD(P)-binding
347784	0.110045	8.32934e-20	0.0320774	8.79349e-23	66.5881	7.32769	2.13597	873	291	4.2.1.18	Methylglutaconyl-CoA hydratase.	methylglutaconyl-CoA hydratase activity	GO:0004490	KOG1679	Enoyl-CoA hydratase	Lipid transport and metabolism	METABOLISM	IPR001753	Crotonase, core
348626	0.648686	0.327685	0.0321171	4.55632e-14	24.5737	15.9406	0.789235	744	248					KOG4412	26S proteasome regulatory complex, subunit PSMD10	Posttranslational modification, protein turnover, chaperones	CELLULAR PROCESSES AND SIGNALING	IPR002110	Ankyrin
289739	0.0189755	1.70929e-06	0.0321855	3.09002e-06	739.444	14.0313	23.7994	1454	454			catalytic activity	GO:0003824	KOG1231	Proteins containing the FAD binding domain	Energy production and conversion	METABOLISM	IPR016166	FAD-binding, type 2
215820	2.80415	0.157302	0.0323981	1.80117e-23	40.5658	113.753	1.31426	1341	447									IPR017853	Glycoside hydrolase, catalytic core	GH72	Glycoside Hydrolase Family 72 protein	x
183381	0.00232847	2.17838e-08	0.0324018	9.21047e-08	540.718	1.25904	17.5203	1353	451			catalytic activity	GO:0003824	KOG4742	Predicted chitinase	General function prediction only	POORLY CHARACTERIZED	IPR011330	Glycoside hydrolase/deacetylase, beta/alpha-barrel	CBM18+AC0-CBM18+AC0-CBM18+AC0-CE4	Carbohydrate+AC0-Binding Module Family 18 / Carbohydrate Esterase Family 4 protein
363287	0.0150608	1.90959e-21	0.0325138	3.18945e-20	83.3041	1.25463	2.70853	923	228	3.1.6.-	Sulfuric ester hydrolases.	alkyl sulfatase activity	GO:0018741					IPR015797	NUDIX
341224	0.0200345	1.49115e-15	0.0325338	1.09916e-13	30.1131	0.603299	0.979691	540	180
20824	0.00454108	1.9894e-15	0.0326235	2.42055e-14	3209.72	14.5756	104.712	279	93
351863	1.56823	0.557282	0.0345187	2.35971e-80	156.05	244.723	5.38663	837	279			nucleic acid binding	GO:0003676	KOG4733	FOG: RRM domain	General function prediction only	POORLY CHARACTERIZED	IPR000504	RNA recognition motif, RNP-1
351099	0.104469	4.23434e-08	0.0347104	4.02219e-09	798.017	83.3682	27.6995	2454	818			chitin binding	GO:0008061	KOG4742	Predicted chitinase	General function prediction only	POORLY CHARACTERIZED	IPR014756	Immunoglobulin E-set	CBM18+AC0-CBM18+AC0-CBM18+AC0-AA5	Carbohydrate+AC0-Binding Module Family 18 / Copper radical oxidase	x
187159	0.0553855	4.88313e-10	0.0351548	8.34486e-10	57.2107	3.16864	2.01123	402	134			copper ion binding	GO:0005507					IPR002355	Multicopper oxidase, copper-binding site
306442	0.219558	1.39772e-41	0.0351887	2.39996e-82	817.787	179.552	28.7768	376	60
365296	0.423902	0.155788	0.0353117	4.17286e-05	7.46163	3.163	0.263483	465	155
365474	4.98013	1.69491e-05	0.0354998	0.00313269	579.371	2885.34	20.5675	2615	754
231085	0.325614	1.43624e-13	0.0355347	7.21867e-36	378.879	123.368	13.4634	183	61
278970	0.860848	0.846022	0.0358507	1.86793e-31	60.0996	51.7366	2.15461	921	260	3.1.3.21	Glycerol-1-phosphatase.	glycerol-1-phosphatase activity	GO:0000121	KOG2914	Predicted haloacid-halidohydrolase and related hydrolases	General function prediction only	POORLY CHARACTERIZED	IPR006439	HAD-superfamily hydrolase, subfamily IA, variant 1
328367	0.997349	0.9859	0.0361157	7.21088e-11	17.9525	17.9049	0.648368	487	51
166036	0.0722094	0.000109848	0.0364742	6.57541e-05	561.364	40.5358	20.4753	315	105									IPR009009	Barwin-related endoglucanase	EXPN	Distantly related to plant expansins
347321	0.0226424	4.969e-132	0.0368414	2.6867e-126	1412.07	31.9727	52.0227	1611	537					KOG1399	Flavin-containing monooxygenase	Secondary metabolites biosynthesis, transport and catabolism	METABOLISM	IPR013027	FAD-dependent pyridine nucleotide-disulphide oxidoreductase
213522	2.31057	0.0279308	0.0374487	2.2042e-40	155.613	359.553	5.82749	369	123
48861	0.472132	0.00159176	0.0377059	4.44451e-30	153.843	72.6341	5.80078	201	67			nucleic acid binding	GO:0003676	KOG4206	Spliceosomal protein snRNP-U1A/U2B	RNA processing and modification	INFORMATION STORAGE AND PROCESSING	IPR000504	RNA recognition motif, RNP-1
320924	0.239468	1.39882e-10	0.0379886	1.10696e-16	32.0243	7.66877	1.21656	543	123
176522	0.221317	0.00281841	0.0382611	5.87989e-05	7.24681	1.60384	0.277271	159	53
207569	0.256987	1.54842e-30	0.0385524	4.74917e-74	166.458	42.7776	6.41736	150	50
364453	0.137906	5.05593e-13	0.0386652	1.15313e-15	49.0828	6.7688	1.8978	1038	346	3.5.5.1	Nitrilase.	nitrilase activity	GO:0000257	KOG0805	Carbon-nitrogen hydrolase	Amino acid transport and metabolism	METABOLISM	IPR003010	Nitrilase/cyanide hydratase and apolipoprotein N-acyltransferase
207641	0.402155	0.0285012	0.0388027	2.33758e-05	103.21	41.5066	4.00484	297	99			translation	GO:0006412	KOG4034	Uncharacterized conserved protein NOF (Neighbor of FAU)	Function unknown	POORLY CHARACTERIZED	IPR007740	Ribosomal protein L49/IMG2
364298	0.158074	0.00150956	0.0394397	0.000148789	6.58934	1.0416	0.259882	575	157
352217	0.580465	0.000886635	0.0396484	5.5216e-22	415.794	241.354	16.4855	189	63
348678	0.603473	0.0130735	0.0399182	7.60137e-37	69.8778	42.1694	2.7894	375	125
337457	0.484315	0.00591859	0.0400146	9.57669e-24	3143.55	1522.47	125.788	881	178
313000	0.574191	0.0986983	0.0402557	5.26272e-15	26.659	15.3073	1.07318	461	103
341356	0.278636	0.00550912	0.0402687	1.12848e-05	8.64361	2.40842	0.348067	1056	352
349457	0.283218	1.45837e-06	0.0403682	2.63313e-12	22.6188	6.40605	0.913081	861	287
342714	0.661275	0.268162	0.0404487	7.63784e-09	14.4783	9.57413	0.585628	1560	520
357481	0.0610276	4.09884e-74	0.040503	1.84342e-98	186.914	11.4069	7.57058	612	150					KOG2401	Predicted MutS-related protein involved in mismatch repair	Replication, recombination and repair	INFORMATION STORAGE AND PROCESSING	IPR002625	Smr protein/MutS2 C-terminal
347847	0.249558	0.000610306	0.0406167	1.88172e-06	10.2341	2.554	0.415676	1803	601					KOG2510	SWI-SNF chromatin-remodeling complex protein	Chromatin structure and dynamics	INFORMATION STORAGE AND PROCESSING
347141	1.03591	0.985484	0.0406791	0.0124794	3.05283	3.16244	0.124186	1065	355			intrinsic to endoplasmic reticulum membrane	GO:0031227	KOG3724	Negative regulator of COPII vesicle formation	Intracellular trafficking, secretion, and vesicular transport	CELLULAR PROCESSES AND SIGNALING	IPR012908	PGAP1-like
346585	0.0528094	2.53129e-10	0.0409857	2.72919e-10	17.1518	0.905774	0.702977	1185	395					KOG1216	von Willebrand factor and related coagulation proteins	Extracellular structures	CELLULAR PROCESSES AND SIGNALING
357814	0.0209579	6.33326e-08	0.0412388	1.93347e-07	75.9825	1.59243	3.13343	7070	2265	2.4.1.183	Alpha-1,3-glucan synthase.	alpha-1,3-glucan synthase activity	GO:0047657	KOG0471	Alpha-amylase	Carbohydrate transport and metabolism	METABOLISM	IPR017853	Glycoside hydrolase, catalytic core	GH13+AF8-22+AC0-GT5	Glycoside Hydrolase Family 13 / Glycosyltransferase Family 5 protein
338258	0.289589	8.3133e-09	0.041318	1.84053e-23	2884.19	835.231	119.169	2107	574	4.1.1.1	Pyruvate decarboxylase.	pyruvate decarboxylase activity	GO:0004737	KOG1184	Thiamine pyrophosphate-requiring enzyme	Coenzyme transport and metabolism	METABOLISM	IPR000399	TPP-binding enzymes, conserved site
363804	0.331229	0.199283	0.0414286	0.0375366	3.23449	1.07136	0.134	1316	371
339261	0.0963133	5.03515e-06	0.041799	1.09579e-06	258.418	24.8891	10.8016	1122	311	1.1.1.-	With NAD(+) or NADP(+) as acceptor.	(R)-2-hydroxyglutarate dehydrogenase activity	GO:0051990	KOG1577	Aldo/keto reductase family proteins	General function prediction only	POORLY CHARACTERIZED	IPR001395	Aldo/keto reductase
363438	1.64661	0.433736	0.0420746	0.0336947	2.2828	3.7589	0.0960481	918	306					KOG3227	Calcium-responsive transcription coactivator	Transcription	INFORMATION STORAGE AND PROCESSING
191468	0.331347	7.86623e-07	0.0426124	0	2532.05	838.987	107.897	498	166
331876	0.815417	0.252015	0.042882	9.61351e-14	103.124	84.089	4.42217	243	54
191358	0.254824	3.36596e-18	0.0430872	5.4523e-166	755.389	192.491	32.5476	180	60			translation	GO:0006412	KOG3506	40S ribosomal protein S29	Translation, ribosomal structure and biogenesis	INFORMATION STORAGE AND PROCESSING	IPR001209	Ribosomal protein S14
37075	9.46773	0.0419621	0.0433337	6.64629e-08	23.5357	222.83	1.01989	816	272	3.5.1.-	In linear amides.	N-acetylgalactosamine-6-phosphate deacetylase activity	GO:0047419	KOG2682	NAD-dependent histone deacetylases and class I sirtuins (SIR2 family)	Chromatin structure and dynamics	INFORMATION STORAGE AND PROCESSING	IPR003000	NAD-dependent histone deacetylase, silent information regulator Sir2
313682	0.481167	0.000693255	0.043427	1.79477e-15	348.504	167.688	15.1345	1072	276					KOG3160	Gamma-interferon inducible lysosomal thiol reductase	Posttranslational modification, protein turnover, chaperones	CELLULAR PROCESSES AND SIGNALING					x	x
342005	1.02799	1	0.043483	0.000143819	39.5337	40.6401	1.71905	2859	953	2.7.1.23	NAD(+) kinase.	NAD+ kinase activity	GO:0003951	KOG1474	Transcription initiation factor TFIID, subunit BDF1 and related bromodomain proteins	Transcription	INFORMATION STORAGE AND PROCESSING	IPR001138	Fungal transcriptional regulatory protein, N-terminal
26399	0.506268	0.0211268	0.0438793	3.58733e-19	66.7115	33.7739	2.92726	195	65			nucleic acid binding	GO:0003676	KOG4206	Spliceosomal protein snRNP-U1A/U2B	RNA processing and modification	INFORMATION STORAGE AND PROCESSING	IPR000504	RNA recognition motif, RNP-1
281999	0.240122	0.00169729	0.04469	5.94162e-06	845.722	203.076	37.7953	1586	469			indoleamine 2,3-dioxygenase activity	GO:0033754					IPR000898	Indoleamine 2,3-dioxygenase
281347	0.162313	0.000292229	0.0453138	2.97874e-05	541.944	87.9645	24.5575	1610	506			indoleamine 2,3-dioxygenase activity	GO:0033754					IPR000898	Indoleamine 2,3-dioxygenase
307589	0.592841	0.232614	0.0456873	3.55935e-16	1179.35	699.164	53.8812	420	124
342228	0.18708	4.33027e-09	0.0457372	1.3915e-16	68.7116	12.8546	3.14267	456	152
347741	0.778421	0.290183	0.0459312	3.07364e-23	47.05	36.6247	2.16106	390	130					KOG1999	RNA polymerase II transcription elongation factor DSIF/SUPT5H/SPT5	Transcription	INFORMATION STORAGE AND PROCESSING
337099	0.297774	0.00849894	0.0461467	3.05633e-05	8.10274	2.41279	0.373915	983	208
366378	0.0107866	3.3607e-12	0.0461921	8.94261e-10	25.3817	0.273783	1.17244	418	119									IPR010916	TonB box, conserved site
77912	0.0750275	4.03133e-12	0.0465458	2.9957e-12	122.045	9.15673	5.68068	159	53
20774	1.65509	0.754722	0.0468706	1.10597e-07	12.7321	21.0728	0.596761	357	119
358629	9.7593	0.0228997	0.0473221	2.14449e-05	154.337	1506.22	7.30356	2492	757	1.11.1.6	Catalase.	heme binding	GO:0020037	KOG0047	Catalase	Inorganic ion transport and metabolism	METABOLISM	IPR011614	Catalase, N-terminal
340654	0.0109466	2.97179e-90	0.0478716	2.05872e-69	178.416	1.95305	8.54108	924	308					KOG1283	Serine carboxypeptidases	Posttranslational modification, protein turnover, chaperones	CELLULAR PROCESSES AND SIGNALING
294022	0.714926	0.152915	0.0479247	4.51213e-09	197.952	141.521	9.48678	1394	426					KOG4023	Uncharacterized conserved protein	Function unknown	POORLY CHARACTERIZED
344572	0.351038	2.62886e-06	0.0479755	1.65506e-18	33.0728	11.6098	1.58668	426	142
346049	0.0699618	7.77061e-06	0.0483881	7.56664e-06	9.48048	0.663272	0.458743	720	240
346547	0.13724	1.38442e-13	0.0484857	4.76305e-16	60.1844	8.25969	2.91809	585	195
315151	3.28693	0.267775	0.0486555	1.62667e-07	13.2857	43.6693	0.646424	341	91
326032	3.99692	0.118513	0.0490183	0.00253666	917.957	3669	44.9967	1593	352			2-alkenal reductase activity	GO:0032440	KOG1196	Predicted NAD-dependent oxidoreductase	General function prediction only	POORLY CHARACTERIZED	IPR016040	NAD(P)-binding
349378	0.380106	0.0910229	0.049189	0.00244539	4.49253	1.70764	0.220983	399	133					KOG0710	Molecular chaperone (small heat-shock protein Hsp26/Hsp42)	Posttranslational modification, protein turnover, chaperones	CELLULAR PROCESSES AND SIGNALING	IPR008978	HSP20-like chaperone
28773	0.186545	7.57055e-30	0.049208	1.78276e-49	135.368	25.2523	6.66118	483	161					KOG0238	3-Methylcrotonyl-CoA carboxylase, biotin-containing subunit/Propionyl-CoA carboxylase, alpha chain/Acetyl-CoA carboxylase, biotin carboxylase subunit	Lipid transport and metabolism	METABOLISM	IPR011053	Single hybrid motif
363610	0.225701	0.00143691	0.0492631	2.6658e-05	8.27895	1.86856	0.407847	817	217
163781	1.24198	0.720272	0.0493716	7.15799e-09	16.6683	20.7018	0.82294	375	125
364774	0.113032	4.51315e-14	0.0494913	5.22617e-16	29.2564	3.30691	1.44794	908	210
355536	1.41172	0.566822	0.0497663	5.2741e-145	299.028	422.144	14.8815	1707	491	1.14.13.8	Dimethylaniline monooxygenase (N-oxide forming).	intrinsic to endoplasmic reticulum membrane	GO:0031227	KOG1399	Flavin-containing monooxygenase	Secondary metabolites biosynthesis, transport and catabolism	METABOLISM	IPR012143	Dimethylaniline monooxygenase, N-oxide-forming
318319	1.0507	0.944606	0.0499141	0.00658757	3.68976	3.87683	0.184171	572	59
322624	1.00961	1	0.0506095	0.00111537	5.19287	5.24277	0.262808	671	143
36471	0.570583	0.00191551	0.0508801	8.17918e-62	150.1	85.6447	7.63712	192	64					KOG3267	Uncharacterized conserved protein	Function unknown	POORLY CHARACTERIZED	IPR001602	Protein of unknown function UPF0047
340064	0.642244	0.101365	0.0510756	1.09959e-08	15.347	9.85654	0.783859	447	149
348520	0.0360176	0.00799123	0.0519295	0.00999704	35.3071	1.27168	1.83348	888	296
169338	0.0163905	1.52707e-09	0.0519329	1.18814e-08	2331.2	38.2096	121.066	1701	567			protein dimerization activity	GO:0046983					IPR014756	Immunoglobulin E-set
342202	0.0748285	1.09273e-16	0.052535	4.22593e-17	30.9982	2.31955	1.62849	1941	647									IPR011009	Protein kinase-like
346050	0.00502978	1.27e-16	0.052878	9.26794e-15	1951.06	9.81338	103.168	399	133					KOG3753	Circadian clock protein period	Signal transduction mechanisms	CELLULAR PROCESSES AND SIGNALING					x	x
343694	0.071679	2.03431e-05	0.0530952	1.61224e-05	405.884	29.0934	21.5505	1326	442					KOG1187	Serine/threonine protein kinase	Signal transduction mechanisms	CELLULAR PROCESSES AND SIGNALING
347251	0.0072006	0.0107206	0.0535484	0.0167274	88.7506	0.639058	4.75245	1023	341													x
194999	0.140898	8.52042e-19	0.0538805	1.29306e-18	45.2688	6.37829	2.4391	219	73
354303	0.29597	1.50085e-08	0.0544113	2.37853e-24	48.8915	14.4704	2.66025	396	132
205584	0.0942867	1.25139e-85	0.0548958	8.0479e-107	6534.82	616.146	358.734	246	82			metal ion binding	GO:0046872	KOG1603	Copper chaperone	Inorganic ion transport and metabolism	METABOLISM	IPR006121	Heavy metal transport/detoxification protein
362878	0.202584	0.00333294	0.0551073	0.000226355	6.58201	1.33341	0.362717	966	322			N-methyltransferase activity	GO:0008170					IPR001091	Site-specific DNA-methyltransferase (cytosine-N4-specific)
275149	0.00140603	6.77273e-14	0.0554928	7.01464e-12	1254.78	1.76425	69.6311	1757	544					KOG1216	von Willebrand factor and related coagulation proteins	Extracellular structures	CELLULAR PROCESSES AND SIGNALING	IPR001938	Thaumatin, pathogenesis-related
347899	0.178296	9.61635e-07	0.0555413	1.25063e-08	29.5899	5.27574	1.64346	840	280
315820	0.348969	0.00272614	0.0565249	8.42995e-07	47.172	16.4616	2.66639	1003	143
327855	20.1453	0.000102696	0.0569545	3.1055e-25	919.797	18529.6	52.3866	350	104									IPR010987	Glutathione S-transferase, C-terminal-like
317665	0.565536	0.00156303	0.0571735	3.24708e-17	33.1461	18.7453	1.89508	371	63
365193	0.356233	0.00932426	0.057288	1.86878e-05	9.17955	3.27006	0.525878	503	146					KOG2992	Nucleolar GTPase/ATPase p130	Nuclear structure	CELLULAR PROCESSES AND SIGNALING
364362	0.181898	8.27286e-05	0.0573145	2.23451e-06	10.6449	1.93628	0.610106	698	202
43734	0.176682	1.0717e-26	0.057535	7.25687e-32	91.2297	16.1186	5.2489	465	155					KOG0505	Myosin phosphatase, regulatory subunit	Posttranslational modification, protein turnover, chaperones	CELLULAR PROCESSES AND SIGNALING	IPR002110	Ankyrin
334885	0.694132	0.570741	0.0576414	3.32841e-11	166.661	115.685	9.60658	1812	515			CoA-transferase activity	GO:0008410	KOG3822	Succinyl-CoA:alpha-ketoacid-CoA transferase	Energy production and conversion	METABOLISM	IPR004164	Coenzyme A transferase active site
346749	0.31322	2.15389e-08	0.0577187	2.16962e-21	40.0171	12.5342	2.30974	915	305
87943	0.35574	8.39486e-42	0.058492	1.326e-109	208.862	74.3007	12.2168	360	120			iron-sulfur cluster binding	GO:0051536	KOG1120	Fe-S cluster biosynthesis protein ISA1 (contains a HesB-like domain)	Inorganic ion transport and metabolism	METABOLISM	IPR000361	HesB/YadR/YfhF-like
286368	0.991414	0.958895	0.0587579	4.03328e-14	28.2725	28.0298	1.66123	933	284			nucleic acid binding	GO:0003676					IPR003034	DNA-binding SAP
359636	1.02608	0.994659	0.0593314	0.000211969	6.76874	6.94525	0.401599	2013	671					KOG3599	Ca2+-modulated nonselective cation channel polycystin	Inorganic ion transport and metabolism	METABOLISM
366963	0.128442	1.73608e-08	0.059649	1.30724e-09	283.47	36.4095	16.9087	699	233	2.7.1.24	Dephospho-CoA kinase.	dephospho-CoA kinase activity	GO:0004140	KOG3220	Similar to bacterial dephospho-CoA kinase	Coenzyme transport and metabolism	METABOLISM	IPR001977	Dephospho-CoA kinase
352033	0.00601833	1.73382e-09	0.0600186	5.35306e-08	73.3564	0.441483	4.40274	1833	611									IPR002110	Ankyrin
348082	1.27271	0.676344	0.0601341	0.00574607	276.23	351.562	16.6109	417	139
317963	0.0573498	1.85128e-60	0.0602605	6.72118e-58	134.391	7.70731	8.09849	453	60
287422	0.029875	8.0744e-122	0.0604441	4.2984e-107	205.409	6.1366	12.4158	880	276	3.5.-.-	Acting on carbon-nitrogen bonds, other than peptide bonds.	hydrolase activity, acting on carbon-nitrogen (but not peptide) bonds	GO:0016810	KOG0807	Carbon-nitrogen hydrolase	Amino acid transport and metabolism	METABOLISM	IPR003010	Nitrilase/cyanide hydratase and apolipoprotein N-acyltransferase
192214	1.75085	0.40131	0.0605237	7.13422e-06	11.8029	20.6652	0.714358	432	144
365118	0.225162	2.60424e-05	0.0614773	3.37056e-09	16.4909	3.71313	1.01382	1326	442									IPR011009	Protein kinase-like
204689	0.236021	0.00029066	0.0619197	5.93719e-06	10.7877	2.54612	0.667971	264	88
294472	0.135327	1.46129e-06	0.0620713	1.03104e-07	29.0224	3.92752	1.80146	719	118			DNA binding	GO:0003677					IPR009072	Histone-fold
352273	0.126664	0.00937973	0.062681	0.00459111	4.15835	0.526714	0.260649	2112	704	3.6.1.3	Adenosinetriphosphatase.	ATPase activity, coupled to transmembrane movement of substances	GO:0042626	KOG0733	Nuclear AAA ATPase (VCP subfamily)	Posttranslational modification, protein turnover, chaperones	CELLULAR PROCESSES AND SIGNALING	IPR003960	AAA ATPase, conserved site
355594	0.137101	1.4813e-13	0.0631201	1.17424e-17	33.2896	4.56404	2.10124	1086	362	6.3.2.-	Acid--D-amino-acid ligases (peptide synthases).	coenzyme F420-2 alpha-glutamyl ligase activity	GO:0043774	KOG1216	von Willebrand factor and related coagulation proteins	Extracellular structures	CELLULAR PROCESSES AND SIGNALING					x
223306	0.754694	0.608904	0.0632588	6.39697e-05	8.29662	6.26141	0.524834	420	140			integral to membrane	GO:0016021	KOG1944	Peroxisomal membrane protein MPV17 and related proteins	General function prediction only	POORLY CHARACTERIZED	IPR007248	Mpv17/PMP22
343759	0.228188	0.000410353	0.0634815	7.9302e-06	10.095	2.30356	0.640846	756	252					KOG1882	Transcriptional regulator SNIP1, contains FHA domain	Signal transduction mechanisms	CELLULAR PROCESSES AND SIGNALING
277246	0.373465	1.08143e-12	0.0637923	5.47973e-36	73.824	27.5707	4.7094	324	57									IPR013958	DASH complex, subunit Dad1
361152	0.103741	1.23616e-11	0.0639389	1.62776e-11	23.3348	2.42078	1.492	1427	424
339126	0.178694	9.0678e-07	0.0639603	1.78409e-08	97.1064	17.3523	6.21096	475	82
289278	0.00382068	1.10984e-06	0.064183	8.56845e-06	1701.13	6.49946	109.183	588	157									IPR008972	Cupredoxin			x	x
363126	1.00711	0.985373	0.0642825	1.43067e-26	60.3012	60.7302	3.87631	466	152					KOG0118	FOG: RRM domain	General function prediction only	POORLY CHARACTERIZED
292899	0.00543226	8.34994e-37	0.0647052	9.13136e-25	161.913	0.879555	10.4766	365	98			sequence-specific DNA binding	GO:0043565	KOG0773	Transcription factor MEIS1 and related HOX domain proteins	Transcription	INFORMATION STORAGE AND PROCESSING	IPR009057	Homeodomain-like
358946	0.675059	0.162407	0.0655753	2.98375e-20	40.1265	27.0878	2.63131	603	146			integral to membrane	GO:0016021	KOG1692	Putative cargo transport protein EMP24 (p24 protein family)	Intracellular trafficking, secretion, and vesicular transport	CELLULAR PROCESSES AND SIGNALING	IPR009038	GOLD
350276	0.710546	0.200802	0.0656241	1.15965e-34	87.2873	62.0216	5.72815	204	68			intracellular	GO:0005622	KOG4265	Predicted E3 ubiquitin ligase	Posttranslational modification, protein turnover, chaperones	CELLULAR PROCESSES AND SIGNALING	IPR007087	Zinc finger, C2H2-type
313907	0.816282	0.60904	0.0661279	3.81388e-05	8.48298	6.9245	0.560962	297	75
364018	0.489881	0.111186	0.0662676	3.02946e-07	20.4371	10.0117	1.35432	918	280
164951	43.6374	0.1358	0.0665283	3.59601e-06	10.555	460.591	0.702203	1443	481	2.4.1.15	Alpha,alpha-trehalose-phosphate synthase (UDP-forming).	alpha,alpha-trehalose-phosphate synthase (UDP-forming) activity	GO:0003825	KOG1050	Trehalose-6-phosphate synthase component TPS1 and related subunits	Carbohydrate transport and metabolism	METABOLISM	IPR012766	Alpha,alpha-trehalose-phosphate synthase	GT20	Glycosyltransferase Family 20 protein
293301	0.2519	0.000167571	0.0667244	1.2263e-07	13.7024	3.45164	0.914286	4520	1396					KOG1474	Transcription initiation factor TFIID, subunit BDF1 and related bromodomain proteins	Transcription	INFORMATION STORAGE AND PROCESSING
207193	0.465341	4.76818e-05	0.0667795	3.26948e-13	42.2029	19.6388	2.81829	219	73					KOG3481	Uncharacterized conserved protein	Function unknown	POORLY CHARACTERIZED	IPR007918	Mitochondrial distribution and morphology family 35/apoptosis
205013	0.156298	4.49589e-11	0.0670641	2.10474e-13	80.9711	12.6556	5.43025	1398	466					KOG3030	Lipid phosphate phosphatase and related enzymes of the PAP2 family	Lipid transport and metabolism	METABOLISM	IPR011046	WD40 repeat-like
95950	1.5237	0.310481	0.0672088	3.77546e-11	29.787	45.3864	2.00195	153	51					KOG0153	Predicted RNA-binding protein (RRM superfamily)	General function prediction only	POORLY CHARACTERIZED
333236	0.124311	5.89752e-34	0.0674362	1.55913e-61	122.967	15.2862	8.29246	1053	170
308912	0.480539	0.026726	0.0684314	1.82544e-17	94.966	45.6349	6.49866	445	112
315520	1.03416	0.987159	0.0684469	0.00958627	3.62892	3.75287	0.248389	591	62
298693	0.428454	0.0455909	0.0685186	4.49393e-06	164.279	70.3858	11.2561	675	124			DNA recombination	GO:0006310	KOG4141	DNA repair and recombination protein RAD52/RAD22	Replication, recombination and repair	INFORMATION STORAGE AND PROCESSING	IPR007232	Rad52/22 double-strand break repair protein
347570	0.327489	0.000718065	0.0685224	1.13995e-06	13.2946	4.35384	0.910979	564	188
171462	0.215312	3.44976e-08	0.0687248	5.47921e-12	36.9581	7.95751	2.53994	243	81
314595	3.68602	0.00611781	0.0690193	2.0955e-08	92.1189	339.552	6.35798	381	71
305738	0.263511	2.22664e-07	0.0690246	5.16791e-56	141.762	37.356	9.7851	680	139
294056	0.0711924	6.92508e-21	0.0697302	1.78177e-19	197.185	14.0381	13.7497	1118	337			carbohydrate transport	GO:0008643	KOG2234	Predicted UDP-galactose transporter	Carbohydrate transport and metabolism	METABOLISM	IPR004689	UDP-galactose transporter
322384	0.122787	5.57079e-74	0.0701726	2.3537e-155	319.703	39.2554	22.4344	472	80					KOG4138	Unchracterized conserved protein (estrogen up-regulated protein E2IG2 in human)	General function prediction only	POORLY CHARACTERIZED	IPR010625	CHCH
361236	0.451811	0.063745	0.0702336	1.37431e-05	9.68097	4.37397	0.679929	1328	411			catalytic activity	GO:0003824					IPR009003	Peptidase, trypsin-like serine and cysteine
331908	0.391622	0.0151372	0.0703836	3.52571e-05	9.35882	3.66512	0.658708	390	95
350937	0.179839	1.88661e-11	0.0704523	2.89071e-23	45.6019	8.201	3.21276	1419	473									IPR017853	Glycoside hydrolase, catalytic core	GH72	Glycoside Hydrolase Family 72 protein
358626	0.134151	1.09698e-09	0.0705163	1.44851e-11	51.3813	6.89287	3.62322	1539	323	1.1.1.179	D-xylose 1-dehydrogenase (NADP+).	D-xylose 1-dehydrogenase (NADP+) activity	GO:0047837	KOG1577	Aldo/keto reductase family proteins	General function prediction only	POORLY CHARACTERIZED	IPR001395	Aldo/keto reductase
347883	0.0436869	7.09047e-10	0.0706096	4.37952e-09	1375.17	60.077	97.1004	591	197			peroxiredoxin activity	GO:0051920	KOG0852	Alkyl hydroperoxide reductase, thiol specific antioxidant and related enzymes	Posttranslational modification, protein turnover, chaperones	CELLULAR PROCESSES AND SIGNALING	IPR012336	Thioredoxin-like fold
201899	0.204957	4.32676e-22	0.0706581	8.15368e-31	293.715	60.1988	20.7533	219	73
283452	0.125832	5.4599e-139	0.0707572	6.0679e-166	519.458	65.3644	36.7554	1017	339
307587	0.792046	0.607507	0.0708038	1.84948e-08	1216.04	963.162	86.1005	530	94
13299	0.101497	2.76884e-08	0.0708296	2.09112e-08	1057.08	107.291	74.8728	543	181	1.15.1.1	Superoxide dismutase.	superoxide dismutase activity	GO:0004784					IPR001424	Superoxide dismutase, copper/zinc binding			x	x
358602	9.97369	0.0239215	0.0711286	1.02499e-32	66.0734	658.996	4.69971	759	163			cell redox homeostasis	GO:0045454	KOG0907	Thioredoxin	Posttranslational modification, protein turnover, chaperones	CELLULAR PROCESSES AND SIGNALING	IPR012336	Thioredoxin-like fold
298460	0.497123	0.226562	0.0713558	0.00637316	4.05798	2.01732	0.28956	1303	403	1.5.3.1	Sarcosine oxidase.	sarcosine oxidase activity	GO:0008115	KOG2820	FAD-dependent oxidoreductase	General function prediction only	POORLY CHARACTERIZED	IPR006076	FAD dependent oxidoreductase
346131	0.370378	6.93837e-05	0.0728379	2.03175e-10	20.9098	7.74451	1.52302	381	127			catalytic activity	GO:0003824					IPR011076	Malate synthase-like, core
183252	0.364892	8.60503e-05	0.0730241	3.94099e-18	363.637	132.688	26.5543	681	227
283816	0.153993	1.75782e-05	0.0730684	1.76777e-06	11.4826	1.76824	0.839018	1109	288	2.7.6.2	Thiamine pyrophosphokinase.	thiamin diphosphate biosynthetic process	GO:0009229	KOG3153	Thiamine pyrophosphokinase	Coenzyme transport and metabolism	METABOLISM	IPR006282	Thiamin pyrophosphokinase
312404	1.13106	0.872509	0.0733239	3.04883e-14	34.1529	38.6291	2.50423	352	57
343290	0.0601682	2.13957e-15	0.0733401	5.07572e-14	31.0201	1.86642	2.27501	1086	362
357683	0.0478913	3.23315e-24	0.0734916	3.3768e-21	42.129	2.01761	3.09612	1575	525	3.4.23.5	Cathepsin D.	cathepsin D activity	GO:0004192	KOG1339	Aspartyl protease	Posttranslational modification, protein turnover, chaperones	CELLULAR PROCESSES AND SIGNALING	IPR009007	Peptidase aspartic, catalytic
311708	0.473286	0.0323175	0.0739559	2.38109e-05	10.4581	4.94968	0.77344	570	88
361388	0.242452	0.000183255	0.0741645	1.64898e-06	11.6914	2.83461	0.867089	760	193
351820	0.0586141	2.40297e-29	0.0744117	1.72314e-27	634.43	37.1866	47.2091	1524	508	2.7.7.23	UDP-N-acetylglucosamine pyrophosphorylase.	UDP-N-acetylglucosamine diphosphorylase activity	GO:0003977	KOG2388	UDP-N-acetylglucosamine pyrophosphorylase	Cell wall/membrane/envelope biogenesis	CELLULAR PROCESSES AND SIGNALING	IPR002618	UTP--glucose-1-phosphate uridylyltransferase
281988	0.0445398	5.71818e-16	0.0751992	1.86459e-14	237.287	10.5687	17.8438	1803	558	3.5.4.4	Adenosine deaminase.	deoxyadenosine deaminase activity	GO:0046936	KOG1097	Adenine deaminase/adenosine deaminase	Nucleotide transport and metabolism	METABOLISM	IPR001365	Adenosine/AMP deaminase
306428	7.84061	0.050977	0.0752408	0.00230055	6.63947	52.0575	0.499559	353	111
336646	0.459444	0.00210091	0.0754052	2.9116e-12	24.5573	11.2827	1.85175	928	89
315363	0.607198	0.0026502	0.0754843	9.37484e-20	4931.76	2994.55	372.27	856	159	3.2.1.18	Exo-alpha-sialidase.	exo-alpha-sialidase activity	GO:0004308	KOG1216	von Willebrand factor and related coagulation proteins	Extracellular structures	CELLULAR PROCESSES AND SIGNALING					x	x
349856	0.87355	0.667856	0.0757015	5.76966e-14	46.5277	40.6443	3.52221	573	191
208648	0.322024	1.35519e-22	0.0760195	6.07113e-32	97.907	31.5284	7.44284	207	69
346713	0.408369	7.25785e-05	0.0760498	1.51957e-14	33.9237	13.8534	2.57989	729	243
221201	0.0517783	2.02817e-45	0.0768627	8.07705e-40	81.3062	4.2099	6.24941	261	87					KOG3383	Uncharacterized conserved protein	Function unknown	POORLY CHARACTERIZED	IPR002740	Protein of unknown function DUF55
340059	0.024671	1.18881e-31	0.0776581	4.57771e-25	51.7779	1.27741	4.02098	870	290
321402	0.986066	1	0.0779123	0.0261791	2.86435	2.82444	0.223168	549	55
344214	0.00121032	1.6241e-14	0.0779799	5.16285e-12	339.939	0.411434	26.5084	771	257
363326	0.0409859	3.65895e-14	0.078668	1.21916e-12	604.444	24.7737	47.5504	847	253
348302	0.719268	0.232506	0.0791178	4.16976e-13	27.5647	19.8264	2.18086	330	110
334220	0.267221	0.000134209	0.0791188	1.8403e-09	29.7302	7.94454	2.35222	634	133
341263	0.262095	4.77039e-06	0.0791351	4.09071e-09	22.486	5.89345	1.77943	399	133													x	x
321620	1.08508	0.910432	0.0791691	0.0278244	2.81888	3.0587	0.223168	549	55
26481	1.06548	0.860809	0.0794003	1.32448e-20	90.745	96.6868	7.20518	153	51					KOG3277	Uncharacterized conserved protein	Function unknown	POORLY CHARACTERIZED	IPR007853	Zinc finger, Zim17-type
36957	0.601051	0.1452	0.0794956	5.47927e-06	11.6283	6.98919	0.924397	405	135			zinc ion binding	GO:0008270					IPR007527	Zinc finger, SWIM-type
19470	0.0793165	0.000623426	0.0794969	0.000875959	347.384	27.5533	27.616	324	108													x	x
325353	0.625636	0.356182	0.0796406	0.00427669	8.71753	5.454	0.694269	381	58
276471	0.914952	0.773009	0.0797418	6.11663e-08	15.5513	14.2287	1.24009	488	115			protein transport	GO:0015031	KOG1652	Mitochondrial import inner membrane translocase, subunit TIM17	Intracellular trafficking, secretion, and vesicular transport	CELLULAR PROCESSES AND SIGNALING	IPR003397	Mitochondrial import inner membrane translocase, subunit Tim17/22
361740	1.53989	0.484402	0.0797923	0.00136239	5.85287	9.01278	0.467014	472	130
314466	1.81143	0.487667	0.0800838	3.85619e-15	30.4583	55.1732	2.43922	1824	327			mitochondrial inner membrane	GO:0005743	KOG0756	Mitochondrial tricarboxylate/dicarboxylate carrier proteins	Energy production and conversion	METABOLISM	IPR001993	Mitochondrial substrate carrier
364120	1.05222	0.947855	0.0801075	1.22421e-06	15.9672	16.8011	1.27909	517	140					KOG1187	Serine/threonine protein kinase	Signal transduction mechanisms	CELLULAR PROCESSES AND SIGNALING
284373	4.94223	0.0142449	0.0801171	0.0400719	2.47682	12.241	0.198435	2331	777	6.3.2.-	Acid--D-amino-acid ligases (peptide synthases).	coenzyme F420-2 alpha-glutamyl ligase activity	GO:0043774	KOG2220	Predicted signal transduction protein	General function prediction only	POORLY CHARACTERIZED
349494	0.151517	9.73805e-12	0.080178	5.50105e-10	27.0565	4.09952	2.16934	291	97
68516	0.0513363	2.5495e-30	0.080326	6.61234e-27	180.827	9.283	14.5251	891	297			membrane	GO:0016020					IPR001499	Fungal pheromone STE3 GPCR
361848	0.589714	0.247582	0.0807121	4.01691e-07	14.6057	8.61318	1.17886	1068	356											GT8	Glycosyltransferase Family 8 protein
356523	0.0883418	2.97387e-98	0.0809601	1.209e-111	319.046	28.1851	25.83	568	187					KOG2992	Nucleolar GTPase/ATPase p130	Nuclear structure	CELLULAR PROCESSES AND SIGNALING
38636	0.00486756	2.99959e-21	0.0817618	5.80253e-17	176.701	0.860103	14.4474	210	70
323626	0.163173	2.57627e-76	0.0820374	3.0592e-252	539.642	88.055	44.2708	2100	575	5.5.1.4	Myo-inositol-1-phosphate synthase.	metabolic process	GO:0008152	KOG0693	Myo-inositol-1-phosphate synthase	Lipid transport and metabolism	METABOLISM	IPR016040	NAD(P)-binding
356880	0.323559	0.00711153	0.0823417	0.000136711	8.66077	2.80227	0.713143	669	212
204715	0.00755877	0.0053901	0.0829198	0.0135256	58.8468	0.44481	4.87957	1680	560			transport	GO:0006810	KOG0254	Predicted transporter (major facilitator superfamily)	General function prediction only	POORLY CHARACTERIZED	IPR016196	MFS general substrate transporter
183226	1.33451	0.596807	0.0831311	3.81388e-05	9.00404	12.016	0.748516	1305	435	2.7.1.-	Phosphotransferases with an alcohol group as acceptor.	GTP-dependent polynucleotide kinase activity	GO:0051735	KOG0588	Serine/threonine protein kinase	Cell cycle control, cell division, chromosome partitioning	METABOLISM	IPR011009	Protein kinase-like
361600	1.6737	0.409865	0.0839835	2.50242e-07	235.901	394.827	19.8118	882	246
330499	0.194105	7.95918e-26	0.0840776	1.27385e-32	856.485	166.248	72.0112	1253	184
338913	0.47083	0.0363089	0.0841434	1.33127e-08	17.072	8.038	1.43649	776	114
181916	1.37852	0.556624	0.0841813	1.80016e-05	12.1478	16.7459	1.02262	1164	388
359787	0.333991	3.61257e-08	0.0845664	1.11962e-15	37.749	12.6078	3.1923	297	99
314898	0.0725229	3.68306e-06	0.0846122	9.72114e-06	1131.17	82.0357	95.7107	1700	330													x
315512	0.64909	0.00790524	0.0848293	2.3923e-25	290.311	188.438	24.6269	314	88									IPR012547	Protein of unknown function DUF1703
347359	0.66733	0.00146954	0.0848921	1.63337e-43	246.604	164.566	20.9347	1335	445
349471	1.96525	0.378671	0.0849922	0.00349196	4.80801	9.44894	0.408643	1725	575			ferric-chelate reductase activity	GO:0000293	KOG0039	Ferric reductase, NADH/NADPH oxidase and related proteins	Secondary metabolites biosynthesis, transport and catabolism	METABOLISM	IPR013121	Ferric reductase, NAD binding
361703	0.504287	4.13676e-05	0.0851222	4.7491e-22	61.2833	30.9044	5.21657	804	268
223494	0.481902	0.0849863	0.0851927	2.05518e-05	11.022	5.31155	0.938997	561	187
365049	0.0779248	3.18702e-07	0.0852606	1.20128e-06	12.4619	0.97109	1.06251	3986	1294					KOG4157	beta-1,6-N-acetylglucosaminyltransferase, contains WSC domain	Carbohydrate transport and metabolism	METABOLISM	IPR011047	Quinonprotein alcohol dehydrogenase-like			x
345384	0.436478	0.00100358	0.085386	1.53892e-09	23.4989	10.2567	2.00648	744	248					KOG4157	beta-1,6-N-acetylglucosaminyltransferase, contains WSC domain	Carbohydrate transport and metabolism	METABOLISM
308923	2.85973	0.104282	0.0860477	6.36936e-07	419.262	1198.97	36.0765	943	162									IPR002332	P-II protein urydylation site
362216	0.440343	3.34038e-05	0.0863032	1.3519e-19	40.6444	17.8975	3.50774	483	137					KOG2539	Mitochondrial/chloroplast ribosome small subunit component	Translation, ribosomal structure and biogenesis	INFORMATION STORAGE AND PROCESSING	IPR015324	Ribosomal protein Rsm22, bacterial-type
330219	0.0422903	1.89581e-30	0.0864458	1.2996e-24	1184.93	50.1109	102.432	649	121			carbon-sulfur lyase activity	GO:0016846	KOG4192	Uncharacterized conserved protein	Function unknown	POORLY CHARACTERIZED	IPR006913	Glutathione-dependent formaldehyde-activating, GFA
346978	0.448972	0.144284	0.0864637	0.00495888	4.61848	2.07357	0.399331	552	184
358992	0.219038	3.02679e-12	0.0871148	2.09079e-21	48.5902	10.6431	4.23292	1779	524									IPR013027	FAD-dependent pyridine nucleotide-disulphide oxidoreductase
345149	0.0447509	2.36045e-06	0.0871426	1.55085e-05	339.556	15.1954	29.5898	1143	381									IPR005556	SUN	GH132	Glycoside Hydrolase Family 132 protein	x
364609	1.07581	0.962826	0.0879657	0.000102341	8.2757	8.9031	0.727978	1715	498													x
234756	0.716242	0.175097	0.0885025	8.14191e-08	89.6029	64.1774	7.93009	303	101					KOG0707	Guanylate kinase	Nucleotide transport and metabolism	METABOLISM	IPR008144	Guanylate kinase
357053	1.22416	0.872509	0.0885481	0.000659204	99.0594	121.265	8.77153	1890	464
321588	0.33806	0.0443324	0.0885945	0.00263405	5.42749	1.83482	0.480846	637	72
310094	7.50935	0.428667	0.0888869	3.10349e-13	36.4693	273.861	3.24165	1216	288	1.-.-.-	Oxidoreductases.	regulation of oxidoreductase activity	GO:0051341	KOG1209	1-Acyl dihydroxyacetone phosphate reductase and related dehydrogenases	Secondary metabolites biosynthesis, transport and catabolism	METABOLISM	IPR016040	NAD(P)-binding
343898	0.224457	1.6064e-16	0.0893132	4.13084e-22	180.365	40.4841	16.109	1236	412	4.1.-.-	Carbon-carbon lyases.	magnesium ion binding	GO:0000287	KOG1185	Thiamine pyrophosphate-requiring enzyme	Coenzyme transport and metabolism	METABOLISM	IPR011766	Thiamine pyrophosphate enzyme, C-terminal TPP-binding
318613	4.55629	0.0831997	0.0893317	0.00248256	5.52953	25.1941	0.493962	357	72
347269	0.127749	0.000214492	0.0893829	0.000147162	7.93748	1.014	0.709475	1329	443			GTP-dependent protein kinase activity	GO:0034211	KOG0615	Serine/threonine protein kinase Chk2 and related proteins	Cell cycle control, cell division, chromosome partitioning	METABOLISM	IPR011009	Protein kinase-like
337270	0.473708	0.00792412	0.0901963	1.19751e-45	97.7476	46.3038	8.81647	313	94									IPR012547	Protein of unknown function DUF1703
324572	0.528205	0.00927452	0.0907812	1.03355e-06	18.9021	9.98421	1.71596	357	86					KOG0506	Glutaminase (contains ankyrin repeat)	Amino acid transport and metabolism	METABOLISM	IPR002110	Ankyrin
362551	0.169435	1.82538e-08	0.0912228	8.54747e-09	22.124	3.74857	2.01821	930	169			DNA replication	GO:0006260					IPR007218	DNA polymerase delta, subunit 4
278019	0.0817295	4.70537e-30	0.091405	5.41774e-30	155.291	12.6918	14.1944	987	329	2.7.1.15	Ribokinase.	D-ribose metabolic process	GO:0006014	KOG2855	Ribokinase	Carbohydrate transport and metabolism	METABOLISM	IPR002173	Carbohydrate/puine kinase, PfkB, conserved site
232214	0.151205	1.23508e-39	0.0915363	5.61618e-49	420.567	63.592	38.4972	459	153			nucleic acid binding	GO:0003676	KOG0111	Cyclophilin-type peptidyl-prolyl cis-trans isomerase	Posttranslational modification, protein turnover, chaperones	CELLULAR PROCESSES AND SIGNALING	IPR000504	RNA recognition motif, RNP-1
362299	0.143823	5.34887e-12	0.0917139	1.08879e-10	39.524	5.68445	3.6249	513	170
274314	0.030195	4.98577e-14	0.093165	5.0697e-11	27.9286	0.843307	2.60197	1097	325									IPR013217	Methyltransferase type 12
344734	0.0611114	2.25085e-77	0.0936021	3.18976e-89	324.792	19.8485	30.4012	1578	526			sterol 14-demethylase activity	GO:0008398	KOG0684	Cytochrome P450	Secondary metabolites biosynthesis, transport and catabolism	METABOLISM	IPR001128	Cytochrome P450
346849	0.477562	2.88449e-05	0.0941841	5.80048e-18	39.5263	18.8762	3.72275	1533	511
351042	0.444659	9.36417e-06	0.0951799	8.6917e-26	56.0671	24.9308	5.33647	978	326
164149	0.0893754	1.40483e-11	0.095266	7.21088e-11	884.557	79.0577	84.2683	1530	510			heme binding	GO:0020037	KOG0158	Cytochrome P450 CYP3/CYP5/CYP6/CYP9 subfamilies	Secondary metabolites biosynthesis, transport and catabolism	METABOLISM	IPR001128	Cytochrome P450
349022	0.325464	9.41326e-08	0.0953389	2.44977e-86	2169.05	705.947	206.794	334	111			ornithine decarboxylase inhibitor activity	GO:0008073					IPR002993	Ornithine decarboxylase antizyme
284782	0.138383	1.16986e-08	0.0957777	4.80422e-09	18.4577	2.55423	1.76784	996	332
273469	0.1823	2.49593e-16	0.0978495	9.89926e-29	63.1609	11.5143	6.18026	1635	512	1.1.3.24	L-galactonolactone oxidase.	catalytic activity	GO:0003824	KOG4730	D-arabinono-1, 4-lactone oxidase	Defense mechanisms	CELLULAR PROCESSES AND SIGNALING	IPR016166	FAD-binding, type 2
162582	0.255728	1.86431e-05	0.0983702	1.89908e-08	18.9283	4.84049	1.86198	627	209					KOG2919	Guanine nucleotide-binding protein	General function prediction only	POORLY CHARACTERIZED	IPR011046	WD40 repeat-like
34408	0.888901	0.882691	0.0985536	0.0283694	3.04307	2.70499	0.299905	294	98					KOG4177	Ankyrin	Cell wall/membrane/envelope biogenesis	CELLULAR PROCESSES AND SIGNALING	IPR002110	Ankyrin
357694	1.54254	0.554414	0.0987513	0.000139233	15.5223	23.9438	1.53285	546	152
316461	0.424434	2.16558e-05	0.0990364	7.35239e-28	61.3344	26.0324	6.07434	302	91
36120	0.595194	2.26727e-06	0.0991824	7.16688e-27	121.879	72.5417	12.0883	255	85
273480	6.32351	0.138689	0.0999491	0.00288652	867.257	5484.11	86.6815	3321	935			protein metabolic process	GO:0019538	KOG1051	Chaperone HSP104 and related ATP-dependent Clp proteases	Posttranslational modification, protein turnover, chaperones	CELLULAR PROCESSES AND SIGNALING	IPR001270	Chaperonin clpA/B
192200	0.0923628	2.78915e-05	0.100745	0.000243174	9.49267	0.876769	0.956337	921	307			hydrolase activity, acting on ester bonds	GO:0016788					IPR007312	Phosphoesterase
305624	0.32748	3.24399e-18	0.100899	6.69616e-24	79.7611	26.1201	8.04781	1050	88
89756	0.23277	0.000267009	0.100904	0.000114939	10.7288	2.49734	1.08258	339	113					KOG0504	FOG: Ankyrin repeat	General function prediction only	POORLY CHARACTERIZED	IPR002110	Ankyrin
362603	0.735846	0.537034	0.101453	0.00178008	5.83989	4.29726	0.592476	942	314
357695	0.291591	0.000844961	0.101538	7.56774e-05	29.0722	8.47719	2.95194	465	155
164027	0.0357862	3.86614e-22	0.101581	5.23286e-17	41.3731	1.48059	4.20271	1431	477	3.2.1.21	Beta-glucosidase.	beta-glucosidase activity	GO:0008422					IPR002772	Glycoside hydrolase, family 3, C-terminal
316222	0.110563	1.26272e-07	0.101944	1.56281e-07	550.664	60.8831	56.1369	1828	472	1.14.13.9	Kynurenine 3-monooxygenase.	kynurenine 3-monooxygenase activity	GO:0004502	KOG2614	Kynurenine 3-monooxygenase and related flavoprotein monooxygenases	General function prediction only	POORLY CHARACTERIZED	IPR006076	FAD dependent oxidoreductase
343340	0.0351174	1.37024e-44	0.10258	1.15102e-33	75.763	2.6606	7.77174	2748	916					KOG4674	Uncharacterized conserved coiled-coil protein	Function unknown	POORLY CHARACTERIZED
351325	0.470641	5.8735e-07	0.102807	2.98335e-24	148.676	69.9731	15.2849	240	80
25141	0.85001	0.699777	0.102983	7.63425e-06	19.2833	16.391	1.98586	222	74
361871	3.69221	0.226697	0.103663	4.63443e-05	13.0026	48.0083	1.34788	1118	369
363617	0.0996531	1.81518e-06	0.103703	6.49874e-06	11.7151	1.16745	1.21489	492	128
273795	0.0896998	6.59062e-54	0.103743	2.15194e-29	120.117	10.7745	12.4613	1677	457	3.1.3.2	Acid phosphatase.	acid phosphatase activity	GO:0003993	KOG3720	Lysosomal & prostatic acid phosphatases	Lipid transport and metabolism	METABOLISM	IPR000560	Histidine acid phosphatase
217420	3.02483	0.164017	0.104554	0.000793911	91.5072	276.794	9.56748	753	251			catalytic activity	GO:0003824	KOG1231	Proteins containing the FAD binding domain	Energy production and conversion	METABOLISM	IPR016166	FAD-binding, type 2
332264	11.0632	0.000493525	0.105211	1.69707e-14	40.0428	443.002	4.21296	508	53
361113	0.021822	1.81487e-06	0.106078	2.56085e-05	616.296	13.4488	65.3756	934	303			protein amino acid phosphorylation	GO:0006468	KOG1437	Fasciclin and related adhesion glycoproteins	Extracellular structures	CELLULAR PROCESSES AND SIGNALING	IPR000782	Beta-Ig-H3/fasciclin
364951	0.293928	0.0139223	0.106125	0.00203914	6.54379	1.9234	0.694458	687	135
337076	0.0883171	1.27241e-08	0.106297	1.06464e-08	388.391	34.3015	41.2849	444	69
305008	0.388993	0.00172715	0.106513	1.81294e-10	1116.69	434.385	118.943	2019	598	1.3.99.1	Succinate dehydrogenase.	succinate dehydrogenase activity	GO:0000104	KOG2404	Fumarate reductase, flavoprotein subunit	Energy production and conversion	METABOLISM	IPR001199	Cytochrome b5
272642	0.186482	0.000666597	0.10703	0.000247311	244.352	45.5672	26.153	1983	512			integral to membrane	GO:0016021	KOG2615	Permease of the major facilitator superfamily	General function prediction only	POORLY CHARACTERIZED	IPR016196	MFS general substrate transporter
333255	0.366497	0.000360554	0.107609	9.33149e-06	20.7063	7.58879	2.22818	277	57
313898	0.497354	0.000639941	0.107617	3.03384e-13	1449.75	721.041	156.018	698	123
316900	0.649315	0.181676	0.107939	9.00959e-16	131.185	85.1806	14.16	232	77
212141	4.01136	0.0387977	0.108188	1.65243e-11	25.2585	101.321	2.73268	414	138					KOG3772	M-phase inducer phosphatase	Cell cycle control, cell division, chromosome partitioning	METABOLISM	IPR001763	Rhodanese-like			x	x
293986	0.091188	2.2663e-76	0.108245	2.65333e-76	299.578	27.3179	32.4279	1708	462	2.6.1.13	Ornithine--oxo-acid aminotransferase.	ornithine-oxo-acid transaminase activity	GO:0004587	KOG1402	Ornithine aminotransferase	Amino acid transport and metabolism	METABOLISM	IPR015424	Pyridoxal phosphate-dependent transferase, major region
344201	0.03539	1.66547e-18	0.108334	2.98796e-12	34.9563	1.2371	3.78696	1833	611					KOG3803	Transcription factor containing C2HC type Zn finger	Transcription	INFORMATION STORAGE AND PROCESSING
309032	0.617567	0.112848	0.108504	1.93347e-07	60.6297	37.4429	6.57859	345	104									IPR012547	Protein of unknown function DUF1703
305531	0.152735	2.49521e-21	0.108692	8.18309e-25	60.7431	9.27761	6.6023	787	128					KOG2806	Chitinase	Carbohydrate transport and metabolism	METABOLISM
358696	1.00775	0.99647	0.109083	1.70077e-07	15.6552	15.7766	1.70772	829	204			outer membrane-bounded periplasmic space	GO:0030288					IPR012336	Thioredoxin-like fold
296044	6.50011	0.429034	0.109321	5.06401e-09	38.1997	248.302	4.17601	2599	713	2.4.1.15	Alpha,alpha-trehalose-phosphate synthase (UDP-forming).	alpha,alpha-trehalose-phosphate synthase (UDP-forming) activity	GO:0003825	KOG1050	Trehalose-6-phosphate synthase component TPS1 and related subunits	Carbohydrate transport and metabolism	METABOLISM	IPR006379	HAD-superfamily hydrolase, subfamily IIB	GT20	Glycosyltransferase Family 20 protein
367193	0.950961	0.918799	0.109623	4.90054e-38	108.589	103.264	11.9039	345	108					KOG2539	Mitochondrial/chloroplast ribosome small subunit component	Translation, ribosomal structure and biogenesis	INFORMATION STORAGE AND PROCESSING	IPR015324	Ribosomal protein Rsm22, bacterial-type
307019	0.1116	8.85711e-17	0.109805	2.14859e-16	850.998	94.9716	93.4437	2119	430					KOG1843	Uncharacterized conserved protein	Function unknown	POORLY CHARACTERIZED	IPR001452	Src homology-3
331521	4.81514	5.52663e-06	0.110738	0.00234849	39.6574	190.956	4.39159	367	77
193168	0.631886	0.027175	0.111234	1.51559e-11	45.2436	28.5888	5.03264	213	71
363456	1.09724	0.87857	0.111342	0.0223996	6.55068	7.18765	0.729365	1132	269
362429	0.0401475	2.09944e-16	0.111437	4.00863e-13	81.4891	3.27158	9.08089	2174	713			intracellular	GO:0005622	KOG2992	Nucleolar GTPase/ATPase p130	Nuclear structure	CELLULAR PROCESSES AND SIGNALING	IPR001357	BRCT
314031	0.0775021	1.1343e-06	0.111479	4.8489e-06	325.135	25.1986	36.2456	1419	307	3.2.1.58	Glucan 1,3-beta-glucosidase.	glucan 1,3-beta-glucosidase activity	GO:0004338					IPR017853	Glycoside hydrolase, catalytic core	GH17	Glycoside Hydrolase Family 17 protein	x
155673	0.575607	0.184049	0.112012	1.2855e-05	126.284	72.6899	14.1453	690	230	3.6.1.23	dUTP pyrophosphatase.	dUTP diphosphatase activity	GO:0004170	KOG3370	dUTPase	Nucleotide transport and metabolism	METABOLISM	IPR008181	DeoxyUTP pyrophosphatase subfamily 1
347912	0.292946	0.0305052	0.112076	0.00632995	5.24847	1.53752	0.588228	729	243									IPR009057	Homeodomain-like
287229	0.238427	6.10355e-57	0.112179	8.68089e-78	248.744	59.3074	27.9038	247	60
357352	0.0998326	9.03095e-12	0.112262	1.05929e-10	23.683	2.36433	2.65869	826	198
357980	8.24419	0.0498864	0.112389	1.78996e-08	591.677	4877.9	66.4979	1133	188			NAD binding	GO:0051287	KOG2682	NAD-dependent histone deacetylases and class I sirtuins (SIR2 family)	Chromatin structure and dynamics	INFORMATION STORAGE AND PROCESSING	IPR003000	NAD-dependent histone deacetylase, silent information regulator Sir2
353600	0.390053	7.6109e-05	0.112459	9.92164e-13	36.6971	14.3138	4.12692	327	109					KOG3413	Mitochondrial matrix protein frataxin, involved in Fe/S protein biosynthesis	Inorganic ion transport and metabolism	METABOLISM	IPR002908	Frataxin-like
324098	1.43223	0.583006	0.112785	2.05176e-07	16.4966	23.627	1.86056	737	140
359950	0.20234	3.36612e-16	0.113001	2.15889e-19	44.9074	9.08658	5.07457	1704	526			transport	GO:0006810	KOG1286	Amino acid transporters	Amino acid transport and metabolism	METABOLISM	IPR002293	Amino acid/polyamine transporter I
343256	0.186018	7.67016e-20	0.114621	2.43043e-30	104.924	19.5178	12.0265	435	145
318187	0.662983	0.563918	0.114622	0.0399168	2.89188	1.91727	0.331474	266	88
50855	0.138802	0.00301855	0.114771	0.00372697	5.45084	0.756587	0.625601	1326	442	3.1.11.1	Exodeoxyribonuclease I.	exodeoxyribonuclease I activity	GO:0008852	KOG2520	5'-3' exonuclease	Replication, recombination and repair	INFORMATION STORAGE AND PROCESSING	IPR008918	Helix-hairpin-helix motif, class 2
352989	7.06866	0.0621628	0.114967	2.08583e-11	120.421	851.215	13.8444	1068	356	3.5.1.-	In linear amides.	N-acetylgalactosamine-6-phosphate deacetylase activity	GO:0047419	KOG2682	NAD-dependent histone deacetylases and class I sirtuins (SIR2 family)	Chromatin structure and dynamics	INFORMATION STORAGE AND PROCESSING	IPR003000	NAD-dependent histone deacetylase, silent information regulator Sir2
140197	0.165452	4.00212e-14	0.115031	2.91132e-19	49.3141	8.15913	5.67266	366	122					KOG4177	Ankyrin	Cell wall/membrane/envelope biogenesis	CELLULAR PROCESSES AND SIGNALING	IPR002110	Ankyrin
282777	0.0877111	1.78652e-18	0.115044	1.45187e-15	35.8709	3.14628	4.12674	1930	566					KOG1399	Flavin-containing monooxygenase	Secondary metabolites biosynthesis, transport and catabolism	METABOLISM	IPR013027	FAD-dependent pyridine nucleotide-disulphide oxidoreductase
315824	0.502152	0.142324	0.115336	0.00417234	6.05864	3.04236	0.69878	526	55
52644	0.708459	0.36112	0.115351	7.60374e-10	31.5381	22.3434	3.63793	222	74			nucleic acid binding	GO:0003676	KOG4209	Splicing factor RNPS1, SR protein superfamily	RNA processing and modification	INFORMATION STORAGE AND PROCESSING	IPR000504	RNA recognition motif, RNP-1
317981	0.106188	1.00263e-07	0.115477	0.000126625	14.5544	1.5455	1.6807	341	56
357377	0.437352	0.0133869	0.115619	2.82032e-07	16.4254	7.18369	1.89909	722	194
228142	0.23332	2.30201e-64	0.115808	6.27814e-76	362.09	84.4827	41.9327	663	221	2.7.7.6	DNA-directed RNA polymerase.	RNA polymerase activity	GO:0034062	KOG3218	RNA polymerase, 25-kDa subunit (common to polymerases I, II and III)	Transcription	INFORMATION STORAGE AND PROCESSING	IPR000783	RNA polymerase, subunit H/Rpb5 C-terminal
310360	0.978877	0.955838	0.1161	8.10427e-06	12.5927	12.3267	1.46201	601	54
304269	1.58312	0.470887	0.11648	0.0119388	4.68184	7.41189	0.545339	674	57
365646	0.0845831	1.44301e-18	0.116558	1.00016e-17	108.355	9.16503	12.6296	1570	428	1.3.99.10	Isovaleryl-CoA dehydrogenase.	isovaleryl-CoA dehydrogenase activity	GO:0008470	KOG0141	Isovaleryl-CoA dehydrogenase	Lipid transport and metabolism	METABOLISM	IPR009100	Acyl-CoA dehydrogenase/oxidase, middle and N-terminal
291733	0.828401	0.682151	0.11657	1.09418e-05	11.6642	9.66262	1.35969	1774	559			nucleic acid binding	GO:0003676	KOG4660	Protein Mei2, essential for commitment to meiosis, and related proteins	Cell cycle control, cell division, chromosome partitioning	METABOLISM	IPR000504	RNA recognition motif, RNP-1
364032	0.0538833	1.68619e-12	0.116593	3.46918e-10	79.1645	4.26565	9.23002	6771	2257	3.6.1.3	Adenosinetriphosphatase.	ATPase activity, coupled to transmembrane movement of substances	GO:0042626	KOG0298	DEAD box-containing helicase-like transcription factor/DNA repair protein	Replication, recombination and repair	INFORMATION STORAGE AND PROCESSING	IPR017441	Protein kinase ATP binding, conserved site
313172	0.00431665	1.49078e-42	0.117059	2.57015e-28	2992.11	12.9159	350.254	1190	246									IPR009050	Globin-like
174032	1.60794	0.507091	0.117699	1.35695e-38	379.364	609.996	44.6508	153	51			electron carrier activity	GO:0009055					IPR006058	2Fe-2S ferredoxin, iron-sulphur binding site
47611	0.786059	0.0923211	0.117713	5.64353e-11	54.7554	43.041	6.44542	396	132					KOG0504	FOG: Ankyrin repeat	General function prediction only	POORLY CHARACTERIZED	IPR002110	Ankyrin
328287	3.13678	0.024392	0.118018	3.30126e-07	15.5205	48.6844	1.83171	968	197													x	x
357672	0.0809521	3.26341e-27	0.118064	9.78991e-26	200.92	16.2649	23.7213	1344	298			C-4 methylsterol oxidase activity	GO:0000254	KOG0873	C-4 sterol methyl oxidase	Lipid transport and metabolism	METABOLISM	IPR006088	Sterol desaturase
280673	0.0338818	4.01201e-11	0.118541	7.58796e-09	206.603	7.00009	24.491	2211	651					KOG3771	Amphiphysin	Intracellular trafficking, secretion, and vesicular transport	CELLULAR PROCESSES AND SIGNALING	IPR014756	Immunoglobulin E-set
359496	0.674526	0.259211	0.118612	6.2436e-11	24.8294	16.7481	2.94505	1134	373			membrane	GO:0016020	KOG2633	Hismacro and SEC14 domain-containing proteins	Chromatin structure and dynamics	INFORMATION STORAGE AND PROCESSING	IPR015927	Peptidase S24, S26A, S26B and S26C
302531	0.142948	2.1131e-22	0.118797	1.78691e-30	76.2033	10.8931	9.0527	2712	796					KOG2146	Splicing coactivator SRm160/300, subunit SRm160 (contains PWI domain)	General function prediction only	POORLY CHARACTERIZED
293415	0.153432	0.00151131	0.119307	0.00154738	72.7607	11.1638	8.68083	1152	318	3.1.3.48	Protein-tyrosine-phosphatase.	prenylated protein tyrosine phosphatase activity	GO:0004727	KOG1471	Phosphatidylinositol transfer protein SEC14 and related proteins	Lipid transport and metabolism	METABOLISM	IPR001251	Cellular retinaldehyde-binding/triple function, C-terminal
164354	0.306975	0.0285012	0.119481	0.00709589	5.50715	1.69056	0.658001	201	67
349591	0.428992	1.87623e-12	0.119788	6.52498e-24	99.2537	42.5791	11.8894	252	84
359603	0.0630237	1.53915e-16	0.119864	8.84465e-13	29.4256	1.85451	3.52706	14815	4890	1.2.1.31	Aminoadipate-semialdehyde dehydrogenase.	aminoadipate-semialdehyde dehydrogenase complex	GO:0005949	KOG1178	Non-ribosomal peptide synthetase/alpha-aminoadipate reductase and related enzymes	Secondary metabolites biosynthesis, transport and catabolism	METABOLISM	IPR009081	Acyl carrier protein-like
295152	0.185294	0.00245236	0.120319	4.30774e-05	10.3493	1.91766	1.24521	1882	619	1.10.3.2	Laccase.	laccase activity	GO:0008471	KOG1263	Multicopper oxidases	Secondary metabolites biosynthesis, transport and catabolism	METABOLISM	IPR008972	Cupredoxin	AA1	Multicopper oxidase
327131	0.715518	0.129626	0.120736	1.98399e-08	22.1357	15.8385	2.67258	319	85
282200	0.0701374	7.88514e-15	0.120962	1.69586e-12	171.293	12.014	20.7199	2150	656	1.1.99.5	Glycerol-3-phosphate dehydrogenase.	oxidoreductase activity	GO:0016491	KOG0042	Glycerol-3-phosphate dehydrogenase	Energy production and conversion	METABOLISM	IPR000447	FAD-dependent glycerol-3-phosphate dehydrogenase
102236	0.219089	1.00146e-06	0.121431	4.01934e-08	17.95	3.93264	2.17968	438	146					KOG0504	FOG: Ankyrin repeat	General function prediction only	POORLY CHARACTERIZED	IPR002110	Ankyrin
272480	0.0375771	1.64505e-14	0.122011	5.76916e-09	23.799	0.8943	2.90376	827	216	5.3.3.5	Cholestenol delta-isomerase.	cholestenol delta-isomerase activity	GO:0047750	KOG4826	C-8,7 sterol isomerase	Lipid transport and metabolism	METABOLISM	IPR007905	Emopamil-binding
274090	0.42296	1.79071e-15	0.122024	3.62635e-52	159.706	67.5492	19.488	1263	242			metabolic process	GO:0008152	KOG4039	Serine/threonine kinase TIP30/CC3	Signal transduction mechanisms	CELLULAR PROCESSES AND SIGNALING	IPR016040	NAD(P)-binding
327926	0.360947	0.00610996	0.122363	0.000106816	10.1863	3.67672	1.24643	401	82
301024	0.171184	1.83876e-06	0.122514	1.05557e-06	16.958	2.90293	2.07759	772	121			cell wall	GO:0005618					IPR001338	Fungal hydrophobin			x	x
65120	0.31562	2.08858e-14	0.123112	2.32549e-21	99.2158	31.3145	12.2147	270	90
173437	0.873649	0.560769	0.123138	1.91938e-06	588.936	514.523	72.5204	282	94			integral to membrane	GO:0016021	KOG1773	Stress responsive protein	General function prediction only	POORLY CHARACTERIZED	IPR000612	Protein of unknown function UPF0057
300606	0.00382709	6.36504e-05	0.123198	0.000841638	739.648	2.83069	91.1234	1096	364					KOG1269	SAM-dependent methyltransferases	General function prediction only	POORLY CHARACTERIZED	IPR013217	Methyltransferase type 12
359178	0.405544	0.00623809	0.123281	2.28418e-05	12.1968	4.94633	1.50364	1287	429	6.3.2.-	Acid--D-amino-acid ligases (peptide synthases).	coenzyme F420-2 alpha-glutamyl ligase activity	GO:0043774	KOG1426	FOG: RCC1 domain	Function unknown	POORLY CHARACTERIZED	IPR009091	Regulator of chromosome condensation/beta-lactamase-inhibitor protein II
322368	13.7055	0.0566811	0.123701	1.75196e-48	118.464	1623.61	14.6541	455	117
346147	0.558562	0.0536777	0.123741	1.3215e-12	29.6704	16.5728	3.67146	1110	370
287667	0.131773	6.90678e-07	0.12391	1.65059e-06	25.5641	3.36866	3.16763	984	212			catalytic activity	GO:0003824					IPR003607	Metal-dependent phosphohydrolase, HD region
339004	0.0337538	5.90127e-09	0.124085	4.28831e-07	239.986	8.10043	29.7786	1233	264	5.4.2.8	Phosphomannomutase.	metabolic process	GO:0008152	KOG3189	Phosphomannomutase	Lipid transport and metabolism	METABOLISM	IPR006379	HAD-superfamily hydrolase, subfamily IIB
166877	0.0331007	8.46864e-06	0.124237	0.000203999	231.854	7.67453	28.8048	951	317
280545	0.59613	0.452967	0.124367	6.95942e-19	53.5642	31.9313	6.6616	332	61
359079	0.521344	0.0639037	0.124452	1.04916e-08	39.3081	20.493	4.89198	856	254	2.1.1.45	Thymidylate synthase.	thymidylate synthase biosynthetic process	GO:0050757	KOG0673	Thymidylate synthase	Nucleotide transport and metabolism	METABOLISM	IPR000398	Thymidylate synthase, C-terminal
285274	0.253173	4.53275e-23	0.124535	1.64882e-26	86.2208	21.8288	10.7375	1695	565					KOG2992	Nucleolar GTPase/ATPase p130	Nuclear structure	CELLULAR PROCESSES AND SIGNALING
306429	0.205466	5.19205e-09	0.125153	4.6605e-11	416.72	85.622	52.1537	615	151
355857	0.104325	3.89939e-12	0.125545	7.8988e-12	124.205	12.9578	15.5934	1542	450	3.2.1.73	Licheninase.	licheninase activity	GO:0042972	KOG3656	FOG: 7 transmembrane receptor	General function prediction only	POORLY CHARACTERIZED	IPR008985	Concanavalin A-like lectin/glucanase	CBM18+AC0-GH16	Carbohydrate+AC0-Binding Module Family 18 / Glycoside Hydrolase Family 16 protein	x
205841	0.09445	2.07188e-78	0.125959	1.20167e-67	254.279	24.0166	32.0288	918	306			pyruvate dehydrogenase (acetyl-transferring) kinase activity	GO:0004740	KOG0787	Dehydrogenase kinase	Signal transduction mechanisms	CELLULAR PROCESSES AND SIGNALING	IPR003594	ATP-binding region, ATPase-like
213094	1.21567	0.769573	0.126598	2.95385e-28	1088.79	1323.6	137.838	243	81			regulation of transcription, DNA-dependent	GO:0006355	KOG0381	HMG box-containing protein	General function prediction only	POORLY CHARACTERIZED	IPR009071	High mobility group box, HMG
364042	0.782253	0.705028	0.126662	0.0311709	3.38221	2.64575	0.428398	771	257
328813	0.37574	3.22761e-05	0.126713	2.14859e-16	256.447	96.3574	32.4952	2044	502									IPR001810	Cyclin-like F-box
281114	0.176173	4.05313e-06	0.126812	1.50334e-06	39.0214	6.87451	4.9484	1044	348
325935	0.333682	2.09346e-25	0.127091	4.11513e-54	154.453	51.5383	19.6296	577	92
332774	0.611588	0.18607	0.127552	0.000115228	23.2747	14.2345	2.96873	352	72
313833	0.153766	1.5516e-24	0.128227	4.99387e-25	140.654	21.6278	18.0357	495	83					KOG3493	Ubiquitin-like protein	Posttranslational modification, protein turnover, chaperones	CELLULAR PROCESSES AND SIGNALING
350362	0.053518	2.02461e-56	0.128394	9.01739e-41	101.593	5.43703	13.0439	3051	1017	6.3.2.-	Acid--D-amino-acid ligases (peptide synthases).	coenzyme F420-2 alpha-glutamyl ligase activity	GO:0043774	KOG1187	Serine/threonine protein kinase	Signal transduction mechanisms	CELLULAR PROCESSES AND SIGNALING	IPR000679	Zinc finger, GATA-type
346695	0.588835	0.315785	0.128613	9.4834e-07	17.6589	10.3982	2.27116	705	235			protein binding	GO:0005515					IPR011333	BTB/POZ fold
355386	6.11766	0.0338374	0.129078	0.00160138	6.60765	40.4234	0.852902	620	180			metabolic process	GO:0008152					IPR016040	NAD(P)-binding
336192	0.0388754	5.53678e-26	0.129113	2.78234e-20	619.282	24.0749	79.9572	1163	170					KOG0471	Alpha-amylase	Carbohydrate transport and metabolism	METABOLISM					x	x
308827	0.444416	0.212145	0.12938	0.0336394	3.39053	1.5068	0.438668	402	62									IPR013838	Beta tubulin, autoregulation binding site
359489	0.189344	6.41617e-13	0.129396	5.83e-15	36.4833	6.90791	4.72079	2564	625
342957	1.30171	0.624414	0.129495	3.7104e-11	35.5177	46.2336	4.59938	720	240					KOG1003	Actin filament-coating protein tropomyosin	Cytoskeleton	CELLULAR PROCESSES AND SIGNALING
350117	0.400241	2.82874e-20	0.129526	2.66909e-72	2088.06	835.729	270.459	432	144
309584	0.810364	0.670464	0.129949	0.00255966	6.33831	5.13634	0.823656	342	62
314252	0.952281	0.925943	0.130367	0.00498922	6.48869	6.17906	0.845909	564	163
295094	0.0316294	3.44722e-40	0.130475	3.76994e-20	270.246	8.54772	35.2603	864	247									IPR011009	Protein kinase-like
366234	0.547809	0.21997	0.130775	0.0100098	5.2577	2.88021	0.687577	427	133
347806	0.602294	0.0991149	0.13101	2.27973e-05	12.3062	7.41195	1.61224	744	248
351641	0.642484	0.323379	0.13127	0.000133039	9.53349	6.12511	1.25146	1491	497			catalytic activity	GO:0003824					IPR011041	Soluble quinoprotein glucose dehydrogenase	AA12	Auxilliary Activities Family 12 protein
304262	0.528753	0.286455	0.131272	0.0263055	3.76341	1.98991	0.49403	248	56
362290	0.113487	1.9821e-18	0.131694	1.56206e-16	40.732	4.62255	5.36417	2504	785	3.4.17.21	Glutamate carboxypeptidase II.	glutamate carboxypeptidase II activity	GO:0043275	KOG2195	Transferrin receptor and related proteins containing the protease-associated (PA) domain	General function prediction only	POORLY CHARACTERIZED	IPR007365	Transferrin receptor-like, dimerisation
194438	0.171561	0.000780629	0.132547	0.00373944	7.57663	1.29986	1.00426	549	183					KOG1426	FOG: RCC1 domain	Function unknown	POORLY CHARACTERIZED	IPR009091	Regulator of chromosome condensation/beta-lactamase-inhibitor protein II
213287	0.116981	3.81554e-59	0.132826	3.2442e-46	1826.19	213.63	242.565	345	115
353564	0.86824	0.915121	0.132958	7.89484e-23	139.414	121.045	18.5361	726	242					KOG4149	Uncharacterized conserved protein	Function unknown	POORLY CHARACTERIZED	IPR010625	CHCH
275646	0.0613925	1.35074e-11	0.133114	4.022e-09	57.8483	3.55145	7.70041	3369	1123	3.6.1.3	Adenosinetriphosphatase.	ATPase activity, coupled to transmembrane movement of substances	GO:0042626	KOG1001	Helicase-like transcription factor HLTF/DNA helicase RAD5, DEAD-box superfamily	Replication, recombination and repair	INFORMATION STORAGE AND PROCESSING	IPR001650	DNA/RNA helicase, C-terminal
90823	1.97256	0.00126975	0.133126	0.000524911	12.6747	25.0017	1.68733	174	58			zinc ion binding	GO:0008270	KOG0802	E3 ubiquitin ligase	Posttranslational modification, protein turnover, chaperones	CELLULAR PROCESSES AND SIGNALING	IPR001841	Zinc finger, RING-type
168962	0.215013	5.2536e-05	0.133427	1.39275e-05	209.74	45.0969	27.9849	1347	449			protein dimerization activity	GO:0046983	KOG1414	Transcriptional activator FOSB/c-Fos and related bZIP transcription factors	Transcription	INFORMATION STORAGE AND PROCESSING	IPR004827	Basic-leucine zipper (bZIP) transcription factor
351223	0.213065	7.07275e-22	0.133502	1.00972e-61	434.213	92.5155	57.9682	1614	538			catalytic activity	GO:0003824	KOG1261	Malate synthase	Energy production and conversion	METABOLISM	IPR011076	Malate synthase-like, core
351235	1.39962	0.298699	0.13367	2.24615e-06	963.675	1348.78	128.815	261	87
184948	0.0148337	9.89505e-87	0.133866	7.26521e-62	758.96	11.2582	101.599	702	234
358576	0.297088	0.00290782	0.134273	0.0001576	9.39968	2.79254	1.26212	3535	1172			nucleoside-triphosphatase activity	GO:0017111	KOG0055	Multidrug/pheromone exporter, ABC superfamily	Secondary metabolites biosynthesis, transport and catabolism	METABOLISM	IPR011527	ABC transporter, transmembrane region, type 1
281414	0.424412	1.89851e-07	0.135541	1.30344e-23	901.792	382.731	122.23	1902	456	3.4.25.1	Proteasome endopeptidase complex.	proteasome endopeptidase activity	GO:0004299	KOG1498	26S proteasome regulatory complex, subunit RPN5/PSMD12	Posttranslational modification, protein turnover, chaperones	CELLULAR PROCESSES AND SIGNALING	IPR000717	Proteasome component region PCI
353692	0.405948	0.0041097	0.135992	1.29175e-06	125.264	50.8508	17.035	936	312			metabolic process	GO:0008152					IPR016040	NAD(P)-binding
165740	0.614956	0.322345	0.136419	0.00295363	8.97687	5.52038	1.22461	252	84
349800	0.159101	4.12278e-29	0.136823	6.10299e-29	73.9919	11.7722	10.1238	705	235	1.1.1.184	Carbonyl reductase (NADPH).	carbonyl reductase (NADPH) activity	GO:0004090	KOG0725	Reductases with broad range of substrate specificities	General function prediction only	POORLY CHARACTERIZED	IPR016040	NAD(P)-binding
311398	1.97888	0.113907	0.136989	0.00878005	6.17975	12.229	0.846557	677	99
23096	0.237323	3.353e-12	0.137377	8.50502e-09	64.9913	15.424	8.92834	318	106
298915	0.882977	0.622592	0.137608	5.76075e-19	91.8858	81.1331	12.6442	1027	247	5.3.3.5	Cholestenol delta-isomerase.	cholestenol delta-isomerase activity	GO:0047750	KOG4826	C-8,7 sterol isomerase	Lipid transport and metabolism	METABOLISM	IPR007905	Emopamil-binding
366148	0.178382	0.000120506	0.137683	0.000110045	10.0796	1.79801	1.38779	2616	872			intracellular	GO:0005622	KOG4475	FOG: Immunoglobin and related proteins	General function prediction only	POORLY CHARACTERIZED	IPR001357	BRCT
175530	0.393381	0.00121465	0.137777	7.34457e-13	81.7988	32.1781	11.27	1053	351			zinc ion binding	GO:0008270	KOG1312	DHHC-type Zn-finger proteins	General function prediction only	POORLY CHARACTERIZED	IPR001594	Zinc finger, DHHC-type
233032	1.52437	0.385377	0.137816	3.47932e-16	483.862	737.583	66.6838	768	256
365500	0.13251	1.65325e-12	0.13802	4.84402e-11	27.2533	3.61133	3.7615	1446	465
297543	0.186817	6.97268e-06	0.138784	4.46188e-06	23.3942	4.37045	3.24673	1674	457			transport	GO:0006810	KOG3764	Vesicular amine transporter	Intracellular trafficking, secretion, and vesicular transport	CELLULAR PROCESSES AND SIGNALING	IPR016196	MFS general substrate transporter
359414	0.542688	0.0869302	0.138795	1.02139e-06	214.827	116.584	29.8168	906	299			FAD binding	GO:0050660					IPR012951	Berberine/berberine-like
69919	1.81774	0.0105944	0.139047	0.000547497	16.9497	30.8102	2.3568	318	106			metabolic process	GO:0008152					IPR016181	Acyl-CoA N-acyltransferase
341712	1.83675	0.184247	0.13912	4.32464e-07	26.5341	48.7364	3.69141	438	146			catalytic activity	GO:0003824	KOG0698	Serine/threonine protein phosphatase	Signal transduction mechanisms	CELLULAR PROCESSES AND SIGNALING	IPR001932	Protein phosphatase 2C-related
289689	0.546968	0.00665929	0.13978	6.6586e-08	24.0974	13.1805	3.36835	327	109
167282	0.0470645	6.64099e-06	0.1402	0.000105971	1489.18	70.0877	208.784	1437	479			microtubule-based process	GO:0007017					IPR017853	Glycoside hydrolase, catalytic core	GH72	Glycoside Hydrolase Family 72 protein	x
80038	0.632735	0.00141726	0.14023	8.89051e-27	84.3372	53.3631	11.8266	189	63
316726	0.552257	0.101601	0.140304	2.13285e-16	146.271	80.779	20.5224	1920	494	2.6.1.19	4-aminobutyrate aminotransferase.	pyridoxal phosphate binding	GO:0030170	KOG1405	4-aminobutyrate aminotransferase	Amino acid transport and metabolism	METABOLISM	IPR015424	Pyridoxal phosphate-dependent transferase, major region
362657	1.33386	0.646689	0.140671	0.0179824	4.09104	5.45689	0.575489	1340	273
365178	0.20323	6.20504e-08	0.140753	3.62404e-11	56.2765	11.4371	7.92111	1083	361	6.3.2.19	Ubiquitin--protein ligase.	negative regulation of ubiquitin-protein ligase activity	GO:0051444	KOG0423	Ubiquitin-protein ligase	Posttranslational modification, protein turnover, chaperones	CELLULAR PROCESSES AND SIGNALING	IPR016135	Ubiquitin-conjugating enzyme/RWD-like
336721	0.138528	1.93882e-05	0.140867	4.46648e-05	759.624	105.23	107.006	761	113			cyclin-dependent protein kinase regulator activity	GO:0016538	KOG3484	Cyclin-dependent protein kinase CDC28, regulatory subunit CKS1, and related proteins	Cell cycle control, cell division, chromosome partitioning	METABOLISM	IPR000789	Cyclin-dependent kinase, regulatory subunit
341779	0.871509	0.682595	0.14146	3.37763e-06	14.1928	12.3691	2.00771	417	139
292445	0.0192551	0.000264971	0.141475	0.00254012	239.467	4.61097	33.8785	2083	594			integral to membrane	GO:0016021	KOG0254	Predicted transporter (major facilitator superfamily)	General function prediction only	POORLY CHARACTERIZED	IPR016196	MFS general substrate transporter
220774	0.0751589	7.81946e-09	0.141884	8.81336e-07	143.557	10.7896	20.3684	459	153
354856	0.142051	7.82546e-22	0.141924	1.78705e-33	90.5013	12.8558	12.8443	1203	401					KOG1869	Splicing coactivator SRm160/300, subunit SRm300	RNA processing and modification	INFORMATION STORAGE AND PROCESSING
312619	0.813211	0.528946	0.142014	3.19499e-07	38.6059	31.3947	5.48257	670	72
304107	0.639622	0.316507	0.142307	0.00332163	9.62096	6.15377	1.36913	161	53
367233	0.369031	5.75709e-05	0.142955	5.7131e-13	229.484	84.6867	32.806	896	204									IPR011008	Dimeric alpha-beta barrel
365195	0.316941	3.60887e-14	0.143055	3.30023e-42	111.694	35.4004	15.9783	1835	432	2.7.1.32	Choline kinase.	choline kinase activity	GO:0004103	KOG4720	Ethanolamine kinase	Lipid transport and metabolism	METABOLISM	IPR011009	Protein kinase-like
350606	0.0579813	3.97123e-28	0.143189	5.90273e-20	52.0326	3.01692	7.45052	543	181			imidazoleglycerol-phosphate dehydratase activity	GO:0004424	KOG3143	Imidazoleglycerol-phosphate dehydratase	Amino acid transport and metabolism	METABOLISM	IPR000807	Imidazole glycerol-phosphate dehydratase
357487	0.253576	0.0144954	0.144032	0.00466866	56.1606	14.241	8.08892	2454	725			nucleic acid binding	GO:0003676	KOG1902	Putative signal transduction protein involved in RNA splicing	Signal transduction mechanisms	CELLULAR PROCESSES AND SIGNALING	IPR007275	YT521-B-like protein
349983	0.0263503	0	0.145125	4.7726e-155	4689.54	123.571	680.569	678	226			nucleosome assembly	GO:0006334	KOG4012	Histone H1	Chromatin structure and dynamics	INFORMATION STORAGE AND PROCESSING	IPR005818	Histone H1/H5
366583	0.376706	0.00167977	0.145433	1.40362e-08	44.3212	16.6961	6.44579	789	263					KOG1471	Phosphatidylinositol transfer protein SEC14 and related proteins	Lipid transport and metabolism	METABOLISM	IPR001251	Cellular retinaldehyde-binding/triple function, C-terminal
214931	1.79044	0.221047	0.145704	0.0164201	268.266	480.316	39.0874	1128	376			respiratory gaseous exchange	GO:0007585					IPR002680	Alternative oxidase
361907	0.214578	7.3971e-09	0.145879	5.58044e-13	191.181	41.0233	27.8893	647	101													x	x
295109	0.0928829	3.69703e-69	0.146119	5.29103e-56	989.16	91.876	144.535	1051	256					KOG1216	von Willebrand factor and related coagulation proteins	Extracellular structures	CELLULAR PROCESSES AND SIGNALING					x	x
164531	0.0507268	1.76447e-54	0.146135	1.0459e-37	120.256	6.10022	17.5737	570	190			bromide peroxidase activity	GO:0019806	KOG0541	Alkyl hydroperoxide reductase/peroxiredoxin	Posttranslational modification, protein turnover, chaperones	CELLULAR PROCESSES AND SIGNALING	IPR012336	Thioredoxin-like fold
313685	0.581851	0.172371	0.146931	0.00023284	12.2415	7.12274	1.79866	346	111
289031	0.156276	9.77571e-09	0.147588	3.35277e-08	163.381	25.5324	24.113	2892	765			ATP binding	GO:0005524	KOG0743	AAA+-type ATPase	Posttranslational modification, protein turnover, chaperones	CELLULAR PROCESSES AND SIGNALING	IPR003960	AAA ATPase, conserved site
204814	0.345549	4.78645e-05	0.147867	2.91698e-10	26.0253	8.993	3.84827	558	186	2.7.7.6	DNA-directed RNA polymerase.	RNA polymerase activity	GO:0034062	KOG4134	DNA-dependent RNA polymerase I	Transcription	INFORMATION STORAGE AND PROCESSING	IPR005576	RNA polymerase Rpb7, N-terminal
285412	0.0914738	1.73622e-17	0.14848	4.51114e-14	98.7326	9.03145	14.6598	1101	367			transition metal ion binding	GO:0046914	KOG0536	Flavohemoprotein b5+b5R	Energy production and conversion	METABOLISM	IPR001199	Cytochrome b5
339931	0.163101	5.24057e-07	0.14849	2.82032e-07	222.59	36.3047	33.0523	743	98
319978	1.46635	0.128389	0.148496	9.82471e-05	20.0155	29.3497	2.97223	759	152
359464	0.240067	5.23e-09	0.149274	8.86202e-09	54.2992	13.0354	8.10543	594	198
304093	1.20654	0.663518	0.149283	0.00240908	6.68095	8.06084	0.997352	324	73
347302	0.194685	1.31793e-06	0.150104	0.000125497	16.2846	3.17038	2.4444	423	141
344196	3.44332	0.119139	0.150152	0.000241028	1732.23	5964.64	260.099	501	167
362276	0.617961	0.131598	0.151522	2.01694e-07	18.4287	11.3882	2.79235	1942	569	1.14.14.1	Unspecific monooxygenase.	unspecific monooxygenase activity	GO:0050381	KOG0157	Cytochrome P450 CYP4/CYP19/CYP26 subfamilies	Secondary metabolites biosynthesis, transport and catabolism	METABOLISM	IPR001128	Cytochrome P450
284809	0.220879	1.51336e-12	0.151664	3.31222e-14	343.333	75.8349	52.0713	513	166									IPR000782	Beta-Ig-H3/fasciclin
351464	0.0631997	6.7297e-09	0.151916	5.19261e-07	393.024	24.839	59.7065	1854	618					KOG1187	Serine/threonine protein kinase	Signal transduction mechanisms	CELLULAR PROCESSES AND SIGNALING
307787	1.52213	0.543243	0.152435	6.23151e-09	34.1541	51.9869	5.20627	372	71
27355	1.00271	0.972104	0.152476	1.01418e-25	146.306	146.703	22.3082	276	92
360628	1.22354	0.740173	0.152782	4.47268e-08	673.761	824.372	102.939	1399	366	3.1.3.16	Serine/threonine specific protein phosphatase.	myosin phosphatase complex	GO:0017023	KOG0548	Molecular co-chaperone STI1	Posttranslational modification, protein turnover, chaperones	CELLULAR PROCESSES AND SIGNALING	IPR013026	Tetratricopeptide region
163299	0.499239	0.00203369	0.153007	1.07097e-12	53.0033	26.4613	8.10989	186	62
363032	0.171308	7.91168e-09	0.15322	2.89258e-08	21.0826	3.61162	3.23027	1213	368													x
288001	5.04333	0.0517528	0.153362	0.00147804	192.784	972.27	29.5656	451	119					KOG1309	Suppressor of G2 allele of skp1	Signal transduction mechanisms	CELLULAR PROCESSES AND SIGNALING	IPR008978	HSP20-like chaperone
354175	0.252101	3.83096e-06	0.153906	2.03966e-07	41.2783	10.4063	6.353	357	119
286589	0.327891	1.4864e-46	0.154015	1.9296e-154	429.715	140.9	66.1827	806	83
287932	0.0877371	2.98035e-15	0.155025	2.28097e-11	29.9548	2.62815	4.64376	532	144
56053	0.283444	3.24986e-12	0.155134	5.55283e-18	95.525	27.076	14.8192	441	147					KOG4177	Ankyrin	Cell wall/membrane/envelope biogenesis	CELLULAR PROCESSES AND SIGNALING	IPR002110	Ankyrin
357040	0.114856	9.89429e-08	0.155162	3.58287e-06	14.9867	1.72132	2.32536	2013	671			GTP-dependent protein kinase activity	GO:0034211	KOG0591	NIMA (never in mitosis)-related G2-specific serine/threonine protein kinase	Cell cycle control, cell division, chromosome partitioning	METABOLISM	IPR011009	Protein kinase-like
333237	0.236183	6.60506e-07	0.155555	5.32442e-10	71.3166	16.8438	11.0936	912	167					KOG0012	DNA damage inducible protein	Replication, recombination and repair	INFORMATION STORAGE AND PROCESSING	IPR016964	Transmembrane protein 97, predicted
366272	0.733148	0.190809	0.155819	2.53443e-06	18.9847	13.9186	2.95818	447	129
214347	5.38221	0.114583	0.155868	2.36137e-07	850.232	4576.13	132.524	1146	382	1.1.1.85	3-isopropylmalate dehydrogenase.	leucine biosynthetic process	GO:0009098	KOG0786	3-isopropylmalate dehydrogenase	Amino acid transport and metabolism	METABOLISM	IPR001804	Isocitrate/isopropylmalate dehydrogenase
319011	0.078078	1.32749e-08	0.156394	0.000154886	15.1835	1.18549	2.3746	556	60
207712	0.0152206	1.11649e-08	0.156978	0.00083252	12.6742	0.192909	1.98958	1878	626			carbohydrate metabolic process	GO:0005975					IPR017853	Glycoside hydrolase, catalytic core	GH36	Glycoside Hydrolase Family 36 protein
366655	0.468576	0.000556709	0.15724	1.19964e-12	34.1438	15.999	5.36877	609	203
367174	1.39682	0.403835	0.15739	0.00377041	6.36694	8.8935	1.00209	885	257
52492	0.316488	0.0057421	0.157565	6.25136e-29	80.4794	25.4708	12.6808	381	127					KOG0504	FOG: Ankyrin repeat	General function prediction only	POORLY CHARACTERIZED	IPR002110	Ankyrin
197885	0.16282	7.63893e-06	0.157658	1.26151e-05	192.783	31.3889	30.3939	1137	379	2.1.1.41	Delta(24)-sterol C-methyltransferase.	sterol 24-C-methyltransferase activity	GO:0003838	KOG1269	SAM-dependent methyltransferases	General function prediction only	POORLY CHARACTERIZED	IPR013705	Sterol methyltransferase C-terminal
367178	0.302373	1.0939e-11	0.157748	6.91375e-40	113.995	34.4689	17.9824	719	158			transport	GO:0006810	KOG0934	Clathrin adaptor complex, small subunit	Intracellular trafficking, secretion, and vesicular transport	CELLULAR PROCESSES AND SIGNALING	IPR011012	Longin-like
362006	0.14603	0.000115882	0.15796	0.000468299	9.08747	1.32705	1.43546	2682	771					KOG2464	Serine/threonine kinase (haspin family)	Cell cycle control, cell division, chromosome partitioning	METABOLISM	IPR011009	Protein kinase-like
357983	0.472898	0.000728348	0.158102	2.91227e-08	99.5962	47.0989	15.7464	1512	421			catalytic activity	GO:0003824	KOG1231	Proteins containing the FAD binding domain	Energy production and conversion	METABOLISM	IPR016166	FAD-binding, type 2
357619	0.257023	5.75525e-07	0.1582	8.82008e-11	28.6486	7.36336	4.5322	809	236			translational initiation	GO:0006413	KOG1670	Translation initiation factor 4F, cap-binding subunit (eIF-4E) and related cap-binding proteins	Translation, ribosomal structure and biogenesis	INFORMATION STORAGE AND PROCESSING	IPR001040	Eukaryotic translation initiation factor 4E (eIF-4E)
314642	0.530493	0.0897273	0.158524	1.69224e-27	80.4503	42.6783	12.7533	327	109
316296	0.166587	4.89666e-13	0.159501	1.16885e-16	46.1956	7.69559	7.36823	884	214
32834	0.487007	0.0487223	0.159808	3.32647e-05	12.3951	6.03648	1.98082	780	260
357243	1.15182	0.640707	0.159911	5.21686e-07	25.5827	29.4668	4.09095	406	121
338608	0.342834	1.14407e-06	0.160348	6.05647e-08	27.9208	9.5722	4.47703	331	58
156943	0.497362	0.10078	0.160599	0.00240934	7.39927	3.68012	1.18832	519	173
359459	0.0983686	0.00180782	0.161349	0.00711453	12.8973	1.26869	2.08097	1392	464
347986	1.6212	0.185392	0.163829	0.0100472	5.91813	9.59444	0.969563	1137	379					KOG2806	Chitinase	Carbohydrate transport and metabolism	METABOLISM					x
353554	0.678917	0.14682	0.164178	3.2999e-12	221.987	150.711	36.4452	477	159	3.6.1.15	Nucleoside-triphosphatase.	nucleoside-triphosphatase activity	GO:0017111	KOG3222	Inosine triphosphate pyrophosphatase	Nucleotide transport and metabolism	METABOLISM	IPR002637	Ham1-like protein
324280	0.408192	0.00509689	0.164378	5.27651e-09	24.0443	9.81471	3.95236	1571	291			nucleic acid binding	GO:0003676					IPR003034	DNA-binding SAP
344823	0.21052	3.24605e-31	0.164504	6.02435e-32	92.3565	19.4429	15.193	1647	549
281654	0.138406	6.04336e-08	0.16498	2.47027e-07	35.1876	4.87015	5.80525	1436	395			GTP-dependent protein kinase activity	GO:0034211	KOG0580	Serine/threonine protein kinase	Cell cycle control, cell division, chromosome partitioning	METABOLISM	IPR011009	Protein kinase-like
366547	1.23582	0.84191	0.165024	1.52593e-06	16.8568	20.8321	2.78177	852	208
356258	0.234323	9.59717e-07	0.165719	2.17881e-07	71.1616	16.6748	11.7928	987	288			nucleic acid binding	GO:0003676	KOG0108	mRNA cleavage and polyadenylation factor I complex, subunit RNA15	RNA processing and modification	INFORMATION STORAGE AND PROCESSING	IPR000504	RNA recognition motif, RNP-1
318241	0.118068	5.12404e-16	0.166137	8.8095e-13	159.916	18.881	26.5679	1027	209	2.1.1.71	Phosphatidyl-N-methylethanolamine N-methyltransferase.	phosphatidyl-N-methylethanolamine N-methyltransferase activity	GO:0000773	KOG4142	Phospholipid methyltransferase	Lipid transport and metabolism	METABOLISM	IPR007318	Phospholipid methyltransferase
361655	0.210246	1.61992e-06	0.166206	2.90502e-06	56.5444	11.8882	9.39805	645	139
316298	0.152517	9.7512e-16	0.166296	5.57041e-17	48.5094	7.39853	8.06691	884	214
293923	0.15904	3.75522e-16	0.166699	8.04157e-25	401.75	63.8945	66.9715	1636	347	1.3.-.-	Acting on the CH-CH group of donors.	1-chloro-2,2-bis(4-chlorophenyl)ethane dehydrogenase activity	GO:0018497	KOG0872	Sterol C5 desaturase	Lipid transport and metabolism	METABOLISM	IPR006088	Sterol desaturase
337834	1.40725	0.548376	0.167205	0.0281327	5.35903	7.54152	0.896059	492	164
364067	0.919477	0.822873	0.167221	1.48191e-14	76.7214	70.5435	12.8294	2663	800	3.2.1.18	Exo-alpha-sialidase.	exo-alpha-sialidase activity	GO:0004308	KOG1869	Splicing coactivator SRm160/300, subunit SRm300	RNA processing and modification	INFORMATION STORAGE AND PROCESSING
334103	0.375385	3.09947e-08	0.167299	3.62648e-11	65.0022	24.4008	10.8748	435	53
320806	0.951204	0.899425	0.167515	2.10954e-07	30.8734	29.3669	5.17176	1429	412			integral to membrane	GO:0016021	KOG2722	Predicted membrane protein	Function unknown	POORLY CHARACTERIZED	IPR004776	Auxin efflux carrier
352192	0.358649	0.0352976	0.167865	0.000779574	183.9	65.9555	30.8703	2562	854
332998	17.2952	0.1923	0.167882	0.0101797	8.20691	141.94	1.37779	879	288	1.-.-.-	Oxidoreductases.	regulation of oxidoreductase activity	GO:0051341	KOG1209	1-Acyl dihydroxyacetone phosphate reductase and related dehydrogenases	Secondary metabolites biosynthesis, transport and catabolism	METABOLISM	IPR016040	NAD(P)-binding
365081	0.176302	4.22312e-24	0.16792	1.16476e-22	705.004	124.294	118.384	945	205			protein transport	GO:0015031	KOG0393	Ras-related small GTPase, Rho type	General function prediction only	POORLY CHARACTERIZED	IPR005225	Small GTP-binding protein
288570	0.973157	0.931118	0.168127	5.06539e-23	99.6885	97.0125	16.7603	260	80			regulation of transcription	GO:0045449	KOG4086	Transcriptional regulator SOH1	Replication, recombination and repair	INFORMATION STORAGE AND PROCESSING	IPR008831	SOH1
349400	0.0104853	7.57908e-55	0.168184	2.59444e-26	2275.33	23.8576	382.676	336	112			nucleic acid binding	GO:0003676	KOG0118	FOG: RRM domain	General function prediction only	POORLY CHARACTERIZED	IPR000504	RNA recognition motif, RNP-1
223553	0.929284	0.800765	0.168372	3.07777e-09	52.5916	48.8725	8.85494	498	166			methyltransferase activity	GO:0008168	KOG2352	Predicted spermine/spermidine synthase	Amino acid transport and metabolism	METABOLISM	IPR013216	Methyltransferase type 11
295966	0.433409	0.000152978	0.169039	1.4375e-06	48.8202	21.1591	8.25251	458	109									IPR012336	Thioredoxin-like fold
346518	0.238912	1.58655e-05	0.170921	3.65192e-05	15.1524	3.6201	2.58988	1542	514									IPR008984	SMAD/FHA domain
293105	0.217083	5.85166e-26	0.170958	2.35884e-61	275.71	59.852	47.135	1378	345					KOG1283	Serine carboxypeptidases	Posttranslational modification, protein turnover, chaperones	CELLULAR PROCESSES AND SIGNALING
218470	0.41296	1.85937e-05	0.171137	1.11084e-13	57.7102	23.8321	9.87635	423	141			cellular metabolic process	GO:0044237	KOG4168	Predicted RNA polymerase III subunit C17	Transcription	INFORMATION STORAGE AND PROCESSING	IPR010997	HRDC-like
346455	5.59482	0.100933	0.171428	0.0189629	4.62212	25.8599	0.792363	810	270
159521	0.198485	8.04826e-09	0.171531	2.33909e-08	22.8124	4.52793	3.91303	570	190
354644	0.0134407	6.00425e-19	0.172315	2.25412e-10	437.883	5.88545	75.454	1704	568	3.2.1.58	Glucan 1,3-beta-glucosidase.	glucan 1,3-beta-glucosidase activity	GO:0004338	KOG1216	von Willebrand factor and related coagulation proteins	Extracellular structures	CELLULAR PROCESSES AND SIGNALING	IPR017853	Glycoside hydrolase, catalytic core	GH17	Glycoside Hydrolase Family 17 protein
310569	0.583633	0.027424	0.172565	1.89576e-22	75.0111	43.7789	12.9443	589	95
352218	0.117941	1.48735e-68	0.172665	4.49086e-60	246.067	29.0215	42.4873	468	156			hydrolase activity	GO:0016787	KOG3043	Predicted hydrolase related to dienelactone hydrolase	General function prediction only	POORLY CHARACTERIZED	IPR002925	Dienelactone hydrolase
367301	0.630937	0.129792	0.173146	8.8772e-15	49.3634	31.1452	8.54709	790	192	2.3.1.-	Transferring groups other than amino-acyl groups.	azetidine-2-carboxylic acid acetyltransferase activity	GO:0046941	KOG3234	Acetyltransferase, (GNAT) family	General function prediction only	POORLY CHARACTERIZED	IPR016181	Acyl-CoA N-acyltransferase
152727	2.97675	2.33968e-12	0.173167	5.49973e-17	136.328	405.813	23.6075	366	122			proline catabolic process	GO:0006562	KOG0186	Proline oxidase	Amino acid transport and metabolism	METABOLISM	IPR002872	Proline dehydrogenase
153264	0.185852	2.76096e-06	0.173563	7.90466e-05	14.7826	2.74737	2.56571	804	268													x	x
30317	0.539848	0.116067	0.174155	0.0168102	8.11356	4.38009	1.41302	156	52
277478	0.082919	2.57718e-14	0.174491	1.76961e-10	256.662	21.2822	44.7853	1860	398	1.17.4.1	Ribonucleoside-diphosphate reductase.	transition metal ion binding	GO:0046914	KOG1567	Ribonucleotide reductase, beta subunit	Nucleotide transport and metabolism	METABOLISM	IPR009078	Ferritin/ribonucleotide reductase-like
360656	0.0432477	1.29743e-25	0.1748	1.58498e-12	43.8654	1.89708	7.66765	722	176
276226	0.095216	1.0904e-10	0.175568	4.71021e-08	67.6782	6.44405	11.8821	1227	310			transporter activity	GO:0005215	KOG0764	Mitochondrial FAD carrier protein	Energy production and conversion	METABOLISM	IPR001993	Mitochondrial substrate carrier
350135	0.127034	1.33716e-15	0.175736	1.38728e-14	42.9698	5.45864	7.55134	1197	399	2.1.2.9	Methionyl-tRNA formyltransferase.	methionyl-tRNA formyltransferase activity	GO:0004479	KOG3082	Methionyl-tRNA formyltransferase	Translation, ribosomal structure and biogenesis	INFORMATION STORAGE AND PROCESSING	IPR002376	Formyl transferase, N-terminal
312166	4.6005	0.00791326	0.175972	8.02829e-05	21.3189	98.0774	3.75152	395	67
136663	0.300625	0.0156646	0.176366	0.0205582	6.60593	1.98591	1.16506	315	105					KOG0504	FOG: Ankyrin repeat	General function prediction only	POORLY CHARACTERIZED	IPR002110	Ankyrin
332483	1.05296	0.903582	0.176574	3.35277e-08	37.8329	39.8365	6.68032	390	130
292779	0.0595993	1.13077e-20	0.176678	2.27858e-11	129.818	7.73704	22.936	1078	294			protein binding	GO:0005515					IPR011333	BTB/POZ fold
153733	0.889814	0.778068	0.176703	0.0173049	7.70402	6.85514	1.36133	180	60									IPR001452	Src homology-3
360280	0.626129	0.0456294	0.176923	2.88318e-06	30.032	18.8039	5.31335	898	255			FMN binding	GO:0010181					IPR009002	FMN-binding split barrel, related
363047	0.0890818	4.90198e-30	0.17699	5.45877e-21	62.811	5.59532	11.1169	835	166
279134	0.00549126	0.00188903	0.177033	0.0163776	423.828	2.32735	75.0315	672	224
208951	0.0370445	1.56351e-72	0.178267	1.69823e-29	292.41	10.8322	52.1271	330	110			acyl-CoA binding	GO:0000062	KOG0817	Acyl-CoA-binding protein	Lipid transport and metabolism	METABOLISM	IPR000582	Acyl-CoA-binding protein, ACBP
165987	0.25094	1.43184e-12	0.178843	2.17515e-14	49.299	12.3711	8.81678	636	212					KOG3272	Predicted coiled-coil protein	General function prediction only	POORLY CHARACTERIZED	IPR008532	Protein of unknown function DUF814
280925	0.284946	3.32672e-06	0.179001	9.50677e-07	24.2883	6.92084	4.34763	530	157			nucleus	GO:0005634					IPR001214	SET
344986	0.566452	0.15499	0.179236	5.87576e-06	15.9471	9.03328	2.8583	1155	385			catalytic activity	GO:0003824					IPR009003	Peptidase, trypsin-like serine and cysteine
274936	0.144445	2.83925e-31	0.179336	2.37853e-24	73.9435	10.6808	13.2607	1650	496			integral to membrane	GO:0016021	KOG2504	Monocarboxylate transporter	Carbohydrate transport and metabolism	METABOLISM	IPR016196	MFS general substrate transporter
287731	0.33757	8.66606e-05	0.179999	9.55787e-34	962.798	325.011	173.303	1683	383	5.2.1.8	Peptidylprolyl isomerase.	cyclophilin-type peptidyl-prolyl cis-trans isomerase activity	GO:0042027	KOG0546	HSP90 co-chaperone CPR7/Cyclophilin	Posttranslational modification, protein turnover, chaperones	CELLULAR PROCESSES AND SIGNALING	IPR015891	Cyclophilin-like
321824	0.335623	2.20175e-14	0.180399	4.30751e-23	72.2288	24.2416	13.03	550	180
357714	0.182646	6.74104e-11	0.18096	7.59568e-11	31.8704	5.82101	5.76726	1076	316			metabolic process	GO:0008152	KOG1208	Dehydrogenases with different specificities (related to short-chain alcohol dehydrogenases)	Secondary metabolites biosynthesis, transport and catabolism	METABOLISM	IPR016040	NAD(P)-binding
348754	1.05665	0.957867	0.181169	1.25453e-07	170.378	180.031	30.8672	1470	490	1.3.1.35	Phosphatidylcholine desaturase.	phosphatidylcholine desaturase activity	GO:0050184					IPR005804	Fatty acid desaturase, type 1
154311	3.09183	0.0587091	0.18161	0.00282651	7.40784	22.9037	1.34533	273	91			zinc ion binding	GO:0008270	KOG4153	Fructose 1,6-bisphosphate aldolase	Carbohydrate transport and metabolism	METABOLISM	IPR000771	Ketose-bisphosphate aldolase, class-II
366910	0.412428	0.000230837	0.181687	2.32633e-07	21.7384	8.96553	3.94959	1423	355													x
317558	21.5879	0.000137952	0.1817	3.99405e-19	69.5136	1500.65	12.6307	1817	397	1.-.-.-	Oxidoreductases.	regulation of oxidoreductase activity	GO:0051341					IPR003819	Taurine catabolism dioxygenase TauD/TfdA
322689	3.97159	0.114062	0.181861	0.000433153	11.8379	47.0154	2.15286	1060	252
355399	0.39179	6.32597e-11	0.182104	3.13512e-31	96.2552	37.7118	17.5285	1017	153					KOG3046	Transcription factor, subunit of SRB subcomplex of RNA polymerase II	Transcription	INFORMATION STORAGE AND PROCESSING
275452	0.138601	1.40684e-20	0.182306	5.76075e-19	198.605	27.5269	36.2069	1473	467	1.14.99.7	Squalene monooxygenase.	squalene monooxygenase activity	GO:0004506	KOG1298	Squalene monooxygenase	Lipid transport and metabolism	METABOLISM	IPR013698	Squalene epoxidase
290003	0.236756	1.11662e-16	0.182847	2.05114e-31	119.497	28.2917	21.8497	1156	228					KOG2883	NIPSNAP1 protein	Function unknown	POORLY CHARACTERIZED	IPR012577	NIPSNAP
335321	0.471918	0.00149458	0.182854	4.14732e-10	34.0363	16.0624	6.22368	318	53			carbohydrate metabolic process	GO:0005975					IPR000577	Carbohydrate kinase, FGGY
25753	0.492325	0.00221928	0.182985	5.02202e-08	48.0335	23.6481	8.7894	156	52
295315	0.721898	0.733102	0.183114	1.62e-18	250.661	180.951	45.8994	1142	214					KOG3065	SNAP-25 (synaptosome-associated protein) component of SNARE complex	Intracellular trafficking, secretion, and vesicular transport	CELLULAR PROCESSES AND SIGNALING	IPR000727	Target SNARE coiled-coil region
337608	0.980447	0.991881	0.183217	0.000609565	9.5925	9.40494	1.75751	489	72
278994	0.0535792	2.7351e-10	0.183553	5.56846e-07	428.72	22.9705	78.6929	1937	449			GTPase activity	GO:0003924	KOG1375	Beta tubulin	Cytoskeleton	CELLULAR PROCESSES AND SIGNALING	IPR008280	Tubulin/FtsZ, C-terminal
349889	0.176944	5.05246e-27	0.183645	1.80305e-47	156.66	27.7201	28.7699	717	239
333350	0.514098	1.83167e-07	0.184227	2.90518e-23	145.309	74.703	26.7698	433	67
174451	0.19253	1.29399e-09	0.185025	7.73055e-10	53.3221	10.2661	9.86592	882	294	3.2.2.-	Hydrolyzing N-glycosyl compounds.	DNA-3-methyladenine glycosylase III activity	GO:0043733	KOG2994	Uracil DNA glycosylase	Replication, recombination and repair	INFORMATION STORAGE AND PROCESSING	IPR005122	Uracil-DNA glycosylase-like
342902	0.478791	0.0697817	0.185438	0.00243969	7.65336	3.66436	1.41923	2892	964
359394	0.291856	5.0012e-09	0.185617	3.19392e-70	531.306	155.065	98.6194	1039	260	1.1.1.125	2-deoxy-D-gluconate 3-dehydrogenase.	2-deoxy-D-gluconate 3-dehydrogenase activity	GO:0008678	KOG0725	Reductases with broad range of substrate specificities	General function prediction only	POORLY CHARACTERIZED	IPR016040	NAD(P)-binding
335031	0.142522	4.71892e-22	0.185632	2.55716e-16	186.469	26.576	34.6147	1227	237
320048	0.56151	0.0286383	0.185632	1.86752e-15	76.0463	42.7008	14.1166	186	62
300892	1.36466	0.669379	0.185799	1.94041e-08	77.1673	105.307	14.3376	579	111
286894	1.49034	0.128408	0.186268	0.000879544	13.6503	20.3435	2.54261	549	79
208849	0.10714	0.000295749	0.186724	0.0235024	7.06531	0.756976	1.31926	306	102			FAD binding	GO:0050660	KOG2335	tRNA-dihydrouridine synthase	Translation, ribosomal structure and biogenesis	INFORMATION STORAGE AND PROCESSING	IPR001269	Dihydrouridine synthase, DuS
189865	0.26559	1.95867e-07	0.18713	2.41696e-07	99.5775	26.4468	18.6339	288	96
314353	0.0428492	2.99385e-39	0.187193	6.13307e-25	483.523	20.7186	90.5122	826	227			regulation of transcription, DNA-dependent	GO:0006355	KOG3149	Transcription initiation factor IIF, auxiliary subunit	Transcription	INFORMATION STORAGE AND PROCESSING	IPR005033	YEATS
206537	0.972336	0.951033	0.187349	0.00975176	5.85727	5.69523	1.09735	384	128
278845	0.0171733	1.59725e-57	0.188177	6.83229e-31	1658.68	28.4851	312.125	1190	345					KOG1269	SAM-dependent methyltransferases	General function prediction only	POORLY CHARACTERIZED	IPR013217	Methyltransferase type 12
280338	0.000565624	2.76183e-07	0.188767	0.000156692	1972.09	1.11546	372.264	559	184													x	x
353306	0.956214	0.905354	0.188913	0.000815486	113.244	108.285	21.3932	639	213									IPR010686	Protein of unknown function DUF1264
340030	0.724507	0.0436314	0.189006	6.77626e-33	273.317	198.02	51.6587	1476	492
348472	0.261422	1.86524e-05	0.189679	3.32459e-06	19.4758	5.09138	3.69415	2145	715
280048	1.45648	0.286686	0.189906	3.33551e-08	24.1949	35.2394	4.59475	1491	423	1.3.1.21	7-dehydrocholesterol reductase.	7-dehydrocholesterol reductase activity	GO:0047598	KOG1435	Sterol reductase/lamin B receptor	Lipid transport and metabolism	METABOLISM	IPR001171	ERG4/ERG24 ergosterol biosynthesis protein
290595	0.708864	0.180549	0.189959	5.07807e-06	18.9216	13.4128	3.59432	2481	796									IPR013655	PAS fold-3
280605	0.0691945	2.40256e-14	0.190273	3.38584e-08	289.423	20.0265	55.0694	3288	1051			metal ion binding	GO:0046872	KOG0961	Predicted Zn2+-dependent endopeptidase, insulinase superfamily	Posttranslational modification, protein turnover, chaperones	CELLULAR PROCESSES AND SIGNALING	IPR011249	Metalloenzyme, LuxS/M16 peptidase-like, metal-binding
356579	0.0514116	4.21484e-52	0.190483	2.90514e-27	219.992	11.3101	41.9049	705	157
357502	0.334178	2.13687e-15	0.190698	2.5796e-66	213.921	71.4877	40.7943	1355	353	3.5.3.4	Allantoicase.	allantoicase activity	GO:0004037	KOG4145	Allantoicase	Nucleotide transport and metabolism	METABOLISM	IPR008979	Galactose-binding like
358448	0.478376	0.072045	0.191202	1.62953e-13	46.3069	22.1521	8.85395	1245	208
327328	1.24338	0.652785	0.191458	1.83627e-13	95.7486	119.052	18.3318	258	86
334105	0.0695237	2.18326e-07	0.191646	4.22026e-05	1075.74	74.7895	206.161	1011	191	2.7.7.6	DNA-directed RNA polymerase.	RNA polymerase activity	GO:0034062	KOG3655	Drebrins and related actin binding proteins	Cytoskeleton	CELLULAR PROCESSES AND SIGNALING					x	x
365452	0.0724477	0.00684728	0.191717	0.0296554	16.6554	1.20665	3.19313	2286	762			protein amino acid dephosphorylation	GO:0006470	KOG1720	Protein tyrosine phosphatase CDC14	Defense mechanisms	CELLULAR PROCESSES AND SIGNALING	IPR000387	Protein-tyrosine phosphatase
299028	0.066428	6.29333e-11	0.192473	1.52889e-05	19.1661	1.27317	3.68897	2076	692	2.4.1.16	Chitin synthase.	chitin biosynthetic process	GO:0006031	KOG2571	Chitin synthase/hyaluronan synthase (glycosyltransferases)	Cell wall/membrane/envelope biogenesis	CELLULAR PROCESSES AND SIGNALING	IPR004834	Chitin synthase	GT2	Glycosyltransferase Family 2 protein
351834	0.179857	3.9842e-131	0.192676	6.7623e-118	1256.43	225.977	242.084	666	222			translational elongation	GO:0006414	KOG1668	Elongation factor 1 beta/delta chain	Transcription	INFORMATION STORAGE AND PROCESSING	IPR014038	Translation elongation factor EF1B, beta and delta chains, guanine nucleotide exchange
188272	0.110561	5.43723e-45	0.193818	6.76564e-22	127.8	14.1297	24.77	270	90									IPR009069	MTCP1
359062	1.65351	0.660194	0.193959	6.69599e-18	57.3026	94.7501	11.1144	1848	549			protein amino acid phosphorylation	GO:0006468	KOG1911	Heterochromatin-associated protein HP1 and related CHROMO domain proteins	Chromatin structure and dynamics	INFORMATION STORAGE AND PROCESSING	IPR017441	Protein kinase ATP binding, conserved site
363904	0.404877	0.129416	0.194306	0.0492321	12.9109	5.22731	2.50866	493	129
276831	0.11259	5.21089e-18	0.194503	4.85373e-12	37.9147	4.26884	7.37452	1401	395					KOG1187	Serine/threonine protein kinase	Signal transduction mechanisms	CELLULAR PROCESSES AND SIGNALING
321625	1.18666	0.423058	0.195632	5.4414e-09	32.1523	38.1538	6.29003	933	113					KOG3105	DNA-binding centromere protein B (CENP-B)	Cell cycle control, cell division, chromosome partitioning	METABOLISM
346961	0.321733	1.4054e-153	0.195685	2.0582e-114	676.151	217.54	132.313	357	119			vesicle-mediated transport	GO:0016192	KOG0860	Synaptobrevin/VAMP-like protein	Intracellular trafficking, secretion, and vesicular transport	CELLULAR PROCESSES AND SIGNALING	IPR001388	Synaptobrevin
321555	0.326517	1.73253e-07	0.195722	1.36487e-06	29.4532	9.61697	5.76464	634	169					KOG4297	C-type lectin	Signal transduction mechanisms	CELLULAR PROCESSES AND SIGNALING
283883	0.698614	0.107712	0.195731	6.50532e-09	27.3014	19.0732	5.34373	2259	622
336942	0.810058	0.584834	0.195783	0.00672208	4000.59	3240.71	783.245	448	84													x	x
326349	0.212806	9.20545e-15	0.195945	6.58834e-44	251.929	53.6119	49.3641	1035	228			protein modification process	GO:0006464	KOG3206	Alpha-tubulin folding cofactor B	Posttranslational modification, protein turnover, chaperones	CELLULAR PROCESSES AND SIGNALING	IPR003006	Immunoglobulin/major histocompatibility complex, conserved site
363991	0.695269	0.312231	0.196022	0.00901101	11.3825	7.91391	2.23123	675	207			intracellular	GO:0005622					IPR001357	BRCT
312553	0.675262	0.240041	0.196385	6.47242e-13	40.862	27.5925	8.02466	523	89					KOG3234	Acetyltransferase, (GNAT) family	General function prediction only	POORLY CHARACTERIZED	IPR016181	Acyl-CoA N-acyltransferase
300404	0.0884517	1.61261e-25	0.198337	1.67197e-12	53.6505	4.74547	10.6409	1021	234	3.1.3.18	Phosphoglycolate phosphatase.	phosphoglycolate phosphatase activity	GO:0008967	KOG3109	Haloacid dehalogenase-like hydrolase	General function prediction only	POORLY CHARACTERIZED	IPR008266	Tyrosine protein kinase, active site
340436	0.723186	0.0232024	0.198555	1.04883e-27	352.246	254.74	69.9404	1593	531
301738	0.937003	0.856387	0.19864	0.00239146	52.022	48.7448	10.3336	757	211									IPR009571	SUR7
338307	0.388504	1.57071e-07	0.199579	2.35082e-26	108.217	42.0427	21.5978	1274	296	2.4.2.19	Nicotinate-nucleotide pyrophosphorylase (carboxylating).	pyridine nucleotide biosynthetic process	GO:0019363	KOG3008	Quinolinate phosphoribosyl transferase	Nucleotide transport and metabolism	METABOLISM	IPR002638	Quinolinate phosphoribosyl transferase
358273	1.36218	0.128408	0.199627	7.64108e-05	86.0611	117.231	17.1801	733	195
326866	2.64704	0.026726	0.199894	3.06546e-06	31.6786	83.8546	6.33238	547	125

## Sheet: Table 6 
Supplementary Table 6. Most highly upregulated transcripts in ectomycorrhizae (ECM) of both Tuber melanosporum-Corylus avellana and T. magnatum-Q. robur, compared to free-living mycelium (FLM).
		Tuber magnatum			Tuber melanosposrum
		RNA-Seq (RPKM)			Oligoarray (fluorescence intensity
Protein ID Tubme1v2	Protein ID Tubma1	FLM	FB	ECM	FLM	FB	ECM	T. melanosporum ECM/FLM ratio	T. magnatum ECM/FLM ratio	Putative function
7301	355669	0.0403917	0.0430676	86.9458	1.749	1.836	10865.9	6212.62	2152.57	Glycoside Hydrolase Family 5 (GH5_5)/endoglucanase
7320	273760	0.0784518	0.693736	119.156	4.254	9.121	19305.1	4538.12	1518.84	Laccase AA1_3
5371	367289	19.8545	514.175	515.593	2.062	3786.66	5436.31	2636.42	25.9685	unknown
3721	171036	4.67738	9.57818	203.143	9.253	989.123	12965.6	1401.24	43.4309	MFS general substrate transporter
7284	273698	4.66773	0.584164	54.3246	18.283	34.673	19493.2	1066.19	11.6383	MFS general substrate transporter
5017	355876	7.2785	34.1499	85.2217	21.517	8700.73	14241	661.85	11.7087	Protein of unknown function DUF1479
5695	159933	0.353976	1.10505	4.1584	1	1.952	659.319	659.32	11.7477	Endonuclease/exonuclease
3538	195976	0.335062	0.317507	121.084	1.701	7.246	680.453	400.03	361.379	Alginate lyase
7019	362698	0.262124	5.55977	278.4	54.903	3739.83	16903.5	307.88	1062.09	Oligopeptide transporter OPT superfamily
7579	286696	0.135496	0.544085	22.7971	30.66	11.303	6905.35	225.22	168.25	Glycoside Hydrolase Family 12/xyloglucan hydrolase
840	354085	22.2474	34.9752	283.601	62.981	1	13663.5	216.95	12.7476	MFS general substrate transporter
5372	339907	25.0463	701.032	1383.54	251.887	17770.7	36290.8	144.08	55.2393	Cytochrome P450
738	276999	0.080841	7.80267	266.779	186.145	234.458	20704.6	111.23	3300.05	Heavy metal transport
332	323947	0.417996	2197.24	558.948	32.532	13898.4	2669.03	82.04	1337.21	Alcohol oxidase AA3_3
7572	302097	7.30796	2.67726	43.5257	0.98	37.954	77.9	79.49	5.95593	Small protein
6939	360568	3.12083	5.83704	143.504	74.817	304.324	5125	68.5	45.9827	Glycoside Hydrolase Family 5 (GH5_9)/endo-β-1,4-glucanase
1707	216767	0.0228086	16.8107	79.9934	114.53	3962.01	6854.38	59.85	3507.16	Cytochrome P450
8973	364650	0.522939	5.29543	8.57274	7.472	3.458	440.998	59.02	16.3934	AAA ATPase
3588	352248	0.052422	4.84235	638.458	764.278	1865.74	42050.7	55.02	12179.2	MFS general substrate transporter
509	299359	57.385	25.8633	319.346	204.999	277.901	10675.6	52.08	5.56497	MFS general substrate transporter
3609	365803	7.42913	1.71345	58.3369	126.285	1394.36	4396.85	34.82	7.85246	MFS general substrate transporter
8244	275584	0.767337	4.06469	27.3861	97.152	51.657	3347.34	34.45	35.6898	Peptidase S10/Serine carboxypeptidase
1133	288018	3.11356	2.85257	278.726	291.073	163.802	9813.92	33.72	89.52	Homeodomain transcription factor
8223	300190	1.9548	2.78723	225.472	465.725	1974.56	15146.3	32.52	115.343	Amino acid permease
8445	355705	2.496	21.5051	86.5231	233.89	20089.2	7054.39	30.16	34.6647	4-coumarate-CoA ligase.
9856	360486	0.0987943	0.489124	48.9056	554.278	4.229	16329.6	29.46	495.025	Glycoside Hydrolase Family 28/Polygalacturonase
7751	314308	4.62932	269.094	283.165	321.749	24157	8046.72	25.01	61.1678	Amino acid/polyamine transporter
2678	357387	4.33127	1.64092	216.159	250.972	33.281	6167.1	24.57	49.9066	MFS general substrate transporter
178	360407	2.41237	2.38645	1757.14	1568.35	170.136	32585.7	20.78	728.386	Major intrinsic protein
6768	358589	2.37684	5.88571	320.192	255.958	2628.52	5204.58	20.33	134.714	Glycoside Hydrolase Family 31/α-glucosidase
797	189106	10.5895	140.905	432.744	1591.66	24511.4	30628.4	19.24	40.8653	Amino acid permease, conserved site
4287	290617	44.4616	10.3385	2563.33	438.154	1755.63	7932.55	18.1	57.6528	unknown
5588	286555	5.29757	2.98782	26.8879	411.043	3445.78	7246.09	17.63	5.07552	NAD(P)-binding domain protein
1722	284562	3.3585	19.4108	126.231	11.434	6.913	192.064	16.8	37.5855	Dienelactone hydrolase/chlorocatechol degradation
7325	307501	11.8995	6.37262	530.925	679.125	7.479	9983.03	14.7	44.6176	MFS general substrate transporter
974	286925	2.92509	6.86223	577.896	1253.46	726.009	18074.9	14.42	197.565	unknown
3546	364016	1.5743	36.7437	10.1581	6.921	74.72	88.762	12.83	6.45249	unknown
3140	357697	5.12626	2.76054	460.546	1732.34	114.802	19674.2	11.36	89.8405	Arsenical-resistance protein ACR3
5797	280670	1.67341	4.984	91.4771	418.899	35.464	4561.16	10.89	54.665	Alcohol oxidase AA3_2
6949	347487	3.1876	0.611971	48.0462	132.67	357.043	1341.97	10.12	15.0728	Pyridoxal phosphate-dependent transferase, major region
1344	363982	1.18562	4.45582	215.033	335.135	536.8	3353.82	10.01	181.367	MFS general substrate transporter
1299	279768	1.88479	1.91848	60.1218	1664.68	6121.91	14866.8	8.93	31.8984	MFS general substrate transporter
5136	283293	3.10469	8.71663	394.558	1352.93	1716.82	11437.4	8.45	127.085	unknown
6758	297684	2.33167	17.8602	48.4663	1758.74	640.885	14045.6	7.99	20.7861	unknown
9391	363190	37.0808	16.4132	241.625	1353.86	1353.29	9952.03	7.35	6.51619	Homeodomain-like
7515	276099	2.855	5.17292	74.99	751.076	3713.32	5473.69	7.29	26.2662	MFS general substrate transporter
6574	286224	14.2437	6.68978	85.7118	1314	2154.6	9418.9	7.17	6.01753	unknown
564	351109	2.6266	14.1585	53.2789	839.79	11.579	5963.17	7.1	20.2844	Alkaline-phosphatase
8392	328608	9.2629	802.168	110.744	2309.28	6564.98	15977.4	6.92	11.9557	Catalase
2461	284350	25.5813	6.25341	568.242	3135.9	1289.14	21174.2	6.75	22.2132	Fumarate reductase/succinate dehydrogenase flavoprotein
3673	359724	37.2857	24.9845	2643.53	6278.82	3683.39	41313.3	6.58	70.8993	Glycosyltransferase Family 8/lipopolysaccharide α-1,3-galactosyltransferase
5786	196742	1.43072	0.706006	95.9107	933.889	129.026	6042.39	6.47	67.0366	unknown
743	277013	17.8462	9.04753	322.403	661.885	28.454	4089.49	6.18	18.0656	Fungal transcriptional regulatory protein
5124	356723	5.50728	2.65329	266.841	2829.74	312.598	17289.2	6.11	48.4524	Class II aldolase
2511	364456	0.151014	0.994912	44.5092	29.587	230.385	172.969	5.85	294.737	Peptidase/cysteine peptidase
3062	285276	8.61658	7.41387	633.522	2450.62	290.792	14212.5	5.8	73.5236	MFS general substrate transporter
5557	306482	59.0693	77.2681	1838.28	5406.76	17805.9	31085.1	5.75	31.1208	Beta tubulin
8428	340723	0.661564	0.419597	414.035	6715.03	8168.52	38476.3	5.73	625.843	unknown
7508	311253	12.8427	17.5909	452.403	3050.05	4486.3	16241.3	5.32	35.2264	unknown
5782	352323	0.128785	0.577669	2.93855	133.103	204.948	691.182	5.19	22.8174	Amine oxidase
6569	225272	35.8106	0.923565	643.704	6263.65	691.468	31418.3	5.02	17.9752	Zinc/iron permease

## Sheet: Table 7
Supplementary Table 7. Number of genes and percentage of KOG categories up-regulated in T. magnatum (Tubma) and T. melanosporum (Tubme) ectomycorrhiza (ECM) and fruiting bodies (FB), compared to free-living mycelium (FLM). For Tubme oligoarray data was used, whereas for Tubma RNA-Seq data was used.
KOG class	Tubma ECM	%	Tubme ECM	%		Tubma FB	%	Tubme FB	%
Amino acid transport and metabolism	13	2.52918	6	1.91083		9	1.84049	8	2.07792
Carbohydrate transport and metabolism	31	6.03113	14	4.4586		0	0	5	1.2987
Cell cycle control, cell division, chromosome partitioning	1	0.194553	1	0.318471		1	0.204499	0	0
Cell wall/membrane/envelope biogenesis	2	0.389105	4	1.27389		6	1.22699	5	1.2987
Chromatin structure and dynamics	7	1.36187	1	0.318471		6	1.22699	1	0.25974
Coenzyme transport and metabolism	2	0.389105	1	0.318471		4	0.817996	1	0.25974
Cytoskeleton	12	2.33463	8	2.54777		3	0.613497	7	1.81818
Defense	6	1.16732	2	0.636943		0	0	2	0.519481
Energy production and conversion	7	1.36187	3	0.955414		1	0.204499	6	1.55844
Extracellular structures	7	1.36187	0	0		2	0.408998	1	0.25974
General function prediction only/unknown	82	15.9533	25	7.96178		39	7.97546	30	7.79221
Inorganic ion transport and metabolism	17	3.30739	7	2.2293		11	2.24949	6	1.55844
Intracellular trafficking, secretion, and vesicular transport	5	0.972763	2	0.636943		0	0	3	0.779221
Lipid transport and metabolism	7	1.36187	6	1.91083		6	1.22699	8	2.07792
Nuclear structure	4	0.77821	0	0		2	0.408998	0	0
Nucleotide transport and metabolism	2	0.389105	3	0.955414		3	0.613497	1	0.25974
Posttranslational modification, protein turnover, chaperones	17	3.30739	7	2.2293		10	2.04499	10	2.5974
Replication, recombination and repair	2	0.389105	1	0.318471		0	0	1	0.25974
RNA processing and modification	7	1.36187	6	1.91083		6	1.22699	9	2.33766
Secondary metabolites biosynthesis, transport and catabolism	14	2.72374	12	3.82166		4	0.817996	7	1.81818
Signal transduction mechanisms	14	2.72374	9	2.86624		9	1.84049	15	3.8961
Transcription	17	3.30739	4	1.27389		13	2.65849	7	1.81818
Translation, ribosomal structure and biogenesis	3	0.583658	2	0.636943		2	0.408998	5	1.2987
No KOG	235	45.7198	190	60.5096		352	71.9836	247	64.1558
Total upregulated genes compared to FLM	514	100	314	100		489	100	385	100

## Sheet: Table 8   
Supplementary Table 8. Presence of mating-type genes in the sequenced Pezizomycetes. The scaffold containing the MAT locus is indicated. ND, not detected.
Species	Scaffold	MAT 1-1-1	MAT 1-2-1
Tuber melanosporum	247		X
Tuber aestivum	16		X
Tuber magnatum	4		X
Choiromyces venosus	159	X
Terfezia boudieri	ND
Morchella conica	48	X
Pyronema confluens	329	X
Ascobolus immersus	381		X

## Sheet: Table 9  
Supplementary Table 9. Upregulated genes (>5-fold) in Tuber magnatum fruiting body (FB) compared to free-living mycelium (FLM). Upregulated genes in ectomycorrhizae (ECM) are also showed (see Supplementary Table S4).
Protein ID	Fold change FB vs FLM	FDR p-value	Fold change ECM vs FLM	FDR p-value correction	FLM mean rpkm	FB mean rpkm	ECM mean rpkm	transcript Size	protein Size	ecNum	KEGG annotation	GO annotation	GO_Acc	kogid	kogdefline	kogClass	kogGroup	Interpro ID	Interpro annotation	Cazy description	Cazy defline	predicted secreted Protein	SSP (>300aa)
304051	>10	0.0206232	0	1	0	10.0951	0	1380	367			catalytic activity	GO:0003824	KOG2905	Transcription initiation factor IIF, small subunit (RAP30)	Transcription	INFORMATION STORAGE AND PROCESSING	IPR011039	Transcription Factor IIF, Rap30/Rap74, interaction
304052	>10	0.0179948	0	1	0	10.0454	0	1380	367			catalytic activity	GO:0003824	KOG2905	Transcription initiation factor IIF, small subunit (RAP30)	Transcription	INFORMATION STORAGE AND PROCESSING	IPR011039	Transcription Factor IIF, Rap30/Rap74, interaction
140374	>9	0.0386322	0	1	0	9.17643	0	159	53
314549	>8	0.0212536	0	1	0	8.21263	0	434	53
325516	>7	0.00216497	0	1	0	7.17673	0	402	73
137154	>6	0.0251455	0	1	0	6.38826	0	183	61
325828	>4	0.0176816	0	1	0	3.88596	0	415	64
150616	>4	0.0190405	0	1	0	3.56489	0	159	53
323484	>3	0.00437239	0	1	0	3.44664	0	418	51
304359	>3	0.033639	0	1	0	3.30049	0	491	98
314519	>2	0.0274137	0	1	0	2.16006	0	864	128
145623	>2	0.0289972	0	1	0	2.13573	0	159	53
317679	>2	0.027912	0	1	0	2.09486	0	562	92
329151	5423.59	0.0393664	0	0.816444	0.0453077	245.73	0	644	159													x	x
323947	5256.61	0.000969895	1337.21	3.10995e-08	0.417996	2197.24	558.948	2055	619	1.1.99.1	Choline dehydrogenase.	choline dehydrogenase activity	GO:0008812	KOG1238	Glucose dehydrogenase/choline dehydrogenase/mandelonitrile lyase (GMC oxidoreductase family)	General function prediction only	POORLY CHARACTERIZED	IPR000172	Glucose-methanol-choline oxidoreductase, N-terminal	AA3+AF8-3	Alcohol oxidase
314147	4116.15	0	9920.93	6.85872e-13	0.00584626	24.0641	58.0004	1058	164													x	x
307776	3930.27	0.00536378	74.0946	0.0110724	0.0704527	276.898	5.22017	1140	299			regulation of transcription, DNA-dependent	GO:0006355	KOG0528	HMG-box transcription factor SOX5	Transcription	INFORMATION STORAGE AND PROCESSING	IPR009071	High mobility group box, HMG
314108	2644.93	0.0061998	0	0.890397	0.0183839	48.624	0	1621	416					KOG3599	Ca2+-modulated nonselective cation channel polycystin	Inorganic ion transport and metabolism	METABOLISM
277460	1697.95	0.0410472	0	0.907324	0.0144997	24.6198	0	599	60
306853	1191.52	0.00606247	0.697112	0.865654	8.59152	10236.9	5.98925	1137	355	1.1.1.1	Alcohol dehydrogenase.	alcohol dehydrogenase activity, iron-dependent	GO:0004025	KOG1198	Zinc-binding oxidoreductase	General function prediction only	POORLY CHARACTERIZED	IPR016040	NAD(P)-binding
364751	1153.77	0.00806306	0	0.89993	0.0160328	18.4982	0	2418	769					KOG2992	Nucleolar GTPase/ATPase p130	Nuclear structure	CELLULAR PROCESSES AND SIGNALING
318965	1110.11	2.1117e-05	137.336	2.66935e-07	0.522834	580.402	71.8038	1044	291					KOG0800	FOG: Predicted E3 ubiquitin ligase	Posttranslational modification, protein turnover, chaperones	CELLULAR PROCESSES AND SIGNALING
331192	1092.05	0.0403435	0	0.821384	0.0434832	47.4859	0	1975	413
307711	1067.45	1.21994e-06	0	0.767792	0.0688164	73.4584	0	848	194
349094	743.311	0.0106254	0	0.897697	0.0168998	12.5618	0	366	122
216767	737.032	0.0159199	3507.16	0.00632664	0.0228086	16.8107	79.9934	1182	394	1.14.14.1	Unspecific monooxygenase.	unspecific monooxygenase activity	GO:0050381	KOG0157	Cytochrome P450 CYP4/CYP19/CYP26 subfamilies	Secondary metabolites biosynthesis, transport and catabolism	METABOLISM	IPR001128	Cytochrome P450
303922	704.113	0.0476801	0	0.838585	0.0368023	25.913	0	236	56
325870	700.467	0.00312668	0	0.519713	0.252389	176.79	0	403	67
366241	682.655	0.0245048	0	0.96939	0.00328309	2.24122	0	1884	628
318747	676.92	0.0232112	0	0.853743	0.0293718	19.8823	0	201	67
366513	672.27	0.0370483	0	0.915796	0.0122157	8.21223	0	711	237
312853	626.861	0.0189537	0	0.697936	0.107241	67.2251	0	949	137
311083	621.514	0.0368098	0	0.804097	0.0487912	30.3244	0	605	83
361449	572.209	0.0381153	0	0.955289	0.00480975	2.75218	0	1286	371					KOG4177	Ankyrin	Cell wall/membrane/envelope biogenesis	CELLULAR PROCESSES AND SIGNALING	IPR002110	Ankyrin
324838	553.805	0.017046	0	0.850402	0.0318292	17.6272	0	1430	344
306947	531.89	0.0196041	0	0.238941	0.696914	370.681	0	826	179
331614	504.379	0.0484218	0	0.772608	0.0663897	33.4856	0	719	228					KOG4297	C-type lectin	Signal transduction mechanisms	CELLULAR PROCESSES AND SIGNALING
348948	488.713	0.0185192	0	0.900222	0.0162345	7.93401	0	762	254
315070	485.15	0.0308724	0	0.617516	0.167943	81.4774	0	777	177													x	x
344180	461.083	0.00484266	0	0.884837	0.0196791	9.0737	0	600	200
276563	446.121	0.00057439	4805.85	0	0.0141009	6.29073	67.7671	1276	325									IPR003006	Immunoglobulin/major histocompatibility complex, conserved site
322440	445.195	0.0405832	0	0.849612	0.0317154	14.1195	0	460	50
334958	436.679	0.0285012	0	0.866748	0.0257447	11.2422	0	796	165
324938	429.605	0.040746	0	0.885323	0.0205493	8.82809	0	301	66
365709	425.14	0.0168274	0	0.764151	0.0704126	29.9352	0	1260	391			catalytic activity	GO:0003824	KOG2905	Transcription initiation factor IIF, small subunit (RAP30)	Transcription	INFORMATION STORAGE AND PROCESSING	IPR011039	Transcription Factor IIF, Rap30/Rap74, interaction
322435	411.18	0.0251717	0	0.920652	0.0104491	4.29645	0	565	88
228907	409.847	3.433e-06	0.586095	0.662246	12.5772	5154.73	7.37144	432	144
313189	405.739	0.0142202	0	0.602855	0.177767	72.1271	0	562	80
364587	390.17	0.0030734	0	0.864326	0.0270757	10.5641	0	4989	1663					KOG0613	Projectin/twitchin and related proteins	Cytoskeleton	CELLULAR PROCESSES AND SIGNALING	IPR013055	Tachykinin/Neurokinin like, conserved site
315172	387.611	0.0290031	0	0.730467	0.0903236	35.0104	0	460	50
364455	379.461	0.015717	0	0.941847	0.00681205	2.58491	0	908	130
141117	358.55	0.00161962	22.17	1.09632e-13	1.23729	443.63	27.4307	447	149					KOG0504	FOG: Ankyrin repeat	General function prediction only	POORLY CHARACTERIZED	IPR002110	Ankyrin
363479	338.622	5.8743e-05	37.1784	0.000104331	0.171049	57.921	6.35932	959	184			DNA binding	GO:0003677	KOG0049	Transcription factor, Myb superfamily	Transcription	INFORMATION STORAGE AND PROCESSING	IPR009057	Homeodomain-like
334107	338.076	0.0289174	0	0.733316	0.0904724	30.5865	0	192	64
339687	332.283	0.0388301	0	0.442508	0.341007	113.311	0	499	80
312721	326.754	0.0336657	0	0.687361	0.116327	38.0104	0	608	59
301372	319.668	0.0310578	0	0.612821	0.167116	53.4216	0	969	241													x	x
329601	297.494	0.0469545	0.933678	0.996642	0.119842	35.6522	0.111894	788	141			transcription initiation from RNA polymerase II promoter	GO:0006367	KOG3463	Transcription initiation factor IIA, gamma subunit	Transcription	INFORMATION STORAGE AND PROCESSING	IPR009088	Transcription factor IIA, beta-barrel
313062	295.268	1.00246e-06	1.52674	0.593701	1.70606	503.745	2.60471	475	63
311085	292.453	0.0377342	0	0.83955	0.0363404	10.6278	0	239	56
306331	289.926	0.0242323	0	0.781153	0.0615573	17.8471	0	237	65
306747	278.609	0.0261513	0	0.621891	0.162469	45.2654	0	254	76
364588	275.616	0.00899106	0	0.771562	0.0660869	18.2146	0	1722	516
362404	275.412	0.010373	0	0.765089	0.0694742	19.134	0	2576	659					KOG1187	Serine/threonine protein kinase	Signal transduction mechanisms	CELLULAR PROCESSES AND SIGNALING
60488	273.189	0.0169292	0	0.848587	0.0327976	8.95994	0	642	214					KOG0504	FOG: Ankyrin repeat	General function prediction only	POORLY CHARACTERIZED	IPR002110	Ankyrin
363834	267.727	0.0131044	3.8729	0.586009	0.25308	67.7565	0.980156	750	170													x	x
314088	254.092	0.0229501	0	0.821736	0.0435588	11.068	0	568	105
306700	253.289	0.0220584	0	0.870546	0.0250298	6.33978	0	694	193
332883	250.693	0.0170896	0	0.746355	0.0817568	20.4959	0	1285	217					KOG1075	FOG: Reverse transcriptase	General function prediction only	POORLY CHARACTERIZED
319946	247.819	0.01975	0	0.769656	0.06649	16.4775	0	794	216
333507	241.092	0.0213574	0	0.689905	0.115049	27.7374	0	1598	437			O-methyltransferase activity	GO:0008171	KOG3178	Hydroxyindole-O-methyltransferase and related SAM-dependent methyltransferases	General function prediction only	POORLY CHARACTERIZED	IPR001077	O-methyltransferase, family 2
367248	240.283	0.023916	0	0.456872	0.321405	77.2282	0	901	252
314256	232.265	0.0358127	0	0.500536	0.273161	63.4459	0	731	121
345397	229.405	0.00833842	0	0.886155	0.0200139	4.59129	0	2076	692
314851	227.218	0.0145451	0	0.836014	0.0360717	8.19613	0	491	98
314852	221.108	0.0169054	0	0.748115	0.0804268	17.783	0	698	128
314553	218.85	0.00897699	0	0.748737	0.0805344	17.6249	0	289	56
315186	213.342	0.0385324	0	0.662902	0.131439	28.0415	0	795	132					KOG4297	C-type lectin	Signal transduction mechanisms	CELLULAR PROCESSES AND SIGNALING
328844	213.092	0.0437289	0	0.634235	0.15187	32.3621	0	231	65
323490	205.644	0.0489712	0	0.774119	0.064465	13.2569	0	597	76
303826	203.792	0.0431317	0	0.722409	0.0969828	19.7643	0	460	50
310503	197.041	0.00536963	0.616632	0.429887	15.5085	3055.81	9.56304	1339	182
347527	195.513	0.0416972	0	0.861056	0.0286645	5.60428	0	303	101
330414	193.357	0.00611281	0	0.706543	0.103489	20.0103	0	668	204
362652	192.805	0.0204006	0	0.796212	0.0546017	10.5275	0	710	159
316974	191.745	0.0474283	0	0.856002	0.0296778	5.69057	0	700	128
357518	187.582	0.0161016	227.555	0.157691	0.0249566	4.68142	5.67899	1417	374													x
314087	183.824	0.0451919	0	0.836062	0.0377923	6.94715	0	491	98
320382	182.657	0.0348315	0	0.771562	0.0662958	12.1094	0	458	50
307429	178.472	0.014215	0	0.65759	0.133404	23.809	0	691	128
315169	176.157	0.0494338	0	0.922	0.0101788	1.79307	0	580	128
303821	174.045	0.0348605	0	0.31595	0.529482	92.1539	0	356	52
363480	165.774	0.0396655	22.9825	0.175976	0.0645803	10.7057	1.48421	653	195
205268	163.767	0.0301584	0	0.733429	0.0885114	14.4953	0	606	202
362095	163.507	0.0308626	0	0.819243	0.0448588	7.33471	0	663	141
342494	160.603	0.00764317	0	0.769395	0.0667401	10.7187	0	2088	696
304265	160.065	0.0470283	0	0.634763	0.150842	24.1446	0	216	62
311088	160.047	0.0210914	0	0.64777	0.142537	22.8126	0	700	128
311279	158.219	0.0219903	0	0.778232	0.0610731	9.66292	0	290	66
320682	155.46	0.0191874	0	0.58255	0.195322	30.3647	0	519	63
356220	153.503	0.00029287	1042.3	0.00871582	0.089785	13.7823	93.5827	1399	364			metabolic process	GO:0008152					IPR006992	Amidohydrolase 2
315110	152.539	0.0236926	0	0.808885	0.0494043	7.53607	0	301	66
303918	151.993	0.0381658	0	0.822677	0.041976	6.38004	0	288	66
324408	151.973	0.0487327	0	0.866988	0.0262091	3.98306	0	236	65
335620	149.155	0.0346088	0	0.838585	0.0368023	5.48925	0	236	65
314527	148.552	0.0400392	0	0.752199	0.0781164	11.6044	0	813	161
213715	147.847	0.0210703	0	0.694319	0.110491	16.3358	0	918	306
314847	147.479	0.044798	0	0.767891	0.0683179	10.0754	0	781	158
345387	147.37	0.00573167	0	0.797195	0.0546599	8.05522	0	5733	1911					KOG1869	Splicing coactivator SRm160/300, subunit SRm300	RNA processing and modification	INFORMATION STORAGE AND PROCESSING	IPR010987	Glutathione S-transferase, C-terminal-like
314737	145.747	0.0460708	0	0.553264	0.220479	32.1341	0	865	225					KOG4297	C-type lectin	Signal transduction mechanisms	CELLULAR PROCESSES AND SIGNALING
358046	142.567	0.0475338	28.51	0.466926	0.0213288	3.04077	0.608084	580	188					KOG3433	Protein involved in meiotic recombination/predicted coiled-coil protein	General function prediction only	POORLY CHARACTERIZED	IPR005647	meiotic nuclear division protein 1
314843	138.199	0.0488549	0	0.778084	0.0621491	8.58891	0	864	97
318986	136.185	4.30312e-06	0	0.763271	0.0720288	9.80926	0	409	75
301400	131.646	0.0363089	0	0.888745	0.0192565	2.53504	0	949	277					KOG0504	FOG: Ankyrin repeat	General function prediction only	POORLY CHARACTERIZED	IPR002110	Ankyrin
311086	131.552	0.0355785	0	0.739522	0.0846446	11.1352	0	458	50
354301	131.08	9.67681e-06	2.27708	0.797551	0.0779084	10.2123	0.177404	1146	382			methyltransferase activity	GO:0008168					IPR013216	Methyltransferase type 11
335967	130.502	0.0220584	0	0.711214	0.0993855	12.97	0	650	132
306745	130.07	0.0364689	0	0.566379	0.208118	27.0699	0	660	97
318650	128.475	0.0161173	0	0.681396	0.121521	15.6124	0	800	233
307431	128.128	0.0387069	0	0.715376	0.098178	12.5793	0	455	77			ribonuclease H activity	GO:0004523					IPR002156	Ribonuclease H
314295	127.617	0.0295376	0	0.556788	0.216065	27.5736	0	900	300
143371	126.241	0.0300989	0	0.688934	0.116978	14.7675	0	180	60			zinc ion binding	GO:0008270	KOG1677	CCCH-type Zn-finger protein	General function prediction only	POORLY CHARACTERIZED	IPR000571	Zinc finger, CCCH-type
364590	123.676	0.00359749	0	0.787218	0.0582106	7.19928	0	1955	484
363458	122.34	0.012836	52.8386	0.457802	0.0228384	2.79406	1.20675	517	150
318748	122.244	0.0318191	0	0.595272	0.182722	22.3367	0	338	69
352020	119.412	0.00927435	21.7132	1.52541e-07	2.37113	283.141	51.4849	1530	510	1.14.13.22	Cyclohexanone monooxygenase.	cyclohexanone monooxygenase activity	GO:0018667	KOG1399	Flavin-containing monooxygenase	Secondary metabolites biosynthesis, transport and catabolism	METABOLISM
315122	117.981	0.00917292	0	0.536527	0.236805	27.9386	0	267	69
325827	117.887	0.033394	0	0.846174	0.0327142	3.85659	0	550	79
312738	117.614	0.0306427	0	0.866988	0.0262091	3.08254	0	236	70
323385	116.716	0.0441398	0	0.644302	0.146632	17.1143	0	663	128
289977	116.356	0.0393226	0	0.488638	0.286324	33.3154	0	405	50
337839	116.304	0.0201341	0	0.708686	0.101969	11.8594	0	772	209
332615	115.484	0.0184585	0	0.799258	0.0525514	6.06883	0	620	104
316124	115.037	0.00319226	0	0.575986	0.198279	22.8094	0	432	144
335494	114.746	0.00653034	7.05285	1.74845e-06	19.4944	2236.9	137.491	1862	576	2.7.7.4	Sulfate adenylyltransferase.	sulfate adenylyltransferase complex (ATP)	GO:0009336	KOG0636	ATP sulfurylase (sulfate adenylyltransferase)	Inorganic ion transport and metabolism	METABOLISM	IPR015947	PUA-like
310126	112.051	0.0155442	0	0.858106	0.0293841	3.2925	0	421	65
358588	110.586	0.00352765	0	0.847467	0.0325413	3.5986	0	743	235	3.5.1.-	In linear amides.	N-acetylgalactosamine-6-phosphate deacetylase activity	GO:0047419	KOG2682	NAD-dependent histone deacetylases and class I sirtuins (SIR2 family)	Chromatin structure and dynamics	INFORMATION STORAGE AND PROCESSING	IPR003000	NAD-dependent histone deacetylase, silent information regulator Sir2
308682	107.943	0.0270861	0	0.799946	0.053138	5.73589	0	438	146
361157	106.827	0.0203372	0	0.830504	0.0381707	4.07766	0	464	149
302726	106.402	0.0318852	0	0.747097	0.0822483	8.75143	0	1307	274			metabolic process	GO:0008152					IPR008854	Thiopurine S-methyltransferase
326938	105.58	0.0170021	0	0.716027	0.0983477	10.3835	0	580	109
281823	105.227	0.00892132	0	0.756885	0.0760271	8.00008	0	1116	372											AA11	Lytic polysaccharide monooxygenase
233155	103.705	1.64707e-07	14.0785	4.24107e-05	21.3708	2216.26	300.87	4581	1527	1.2.1.51	Pyruvate dehydrogenase (NADP+).	pyruvate dehydrogenase (NADP+) activity	GO:0050243	KOG0560	Sulfite reductase (ferredoxin)	Inorganic ion transport and metabolism	METABOLISM	IPR005117	Nitrite/sulphite reductase, hemoprotein beta-component, ferrodoxin-like
362450	98.622	0.0146905	0	0.836062	0.0372899	3.6776	0	1146	382					KOG2146	Splicing coactivator SRm160/300, subunit SRm160 (contains PWI domain)	General function prediction only	POORLY CHARACTERIZED
37301	97.6114	0.00575027	0	0.821359	0.0418704	4.08703	0	423	141
276999	96.5186	0.000292367	3300.05	0	0.080841	7.80267	266.779	2717	834	3.6.3.4	Copper-exporting ATPase.	copper-exporting ATPase activity	GO:0004008	KOG0207	Cation transport ATPase	Inorganic ion transport and metabolism	METABOLISM	IPR006121	Heavy metal transport/detoxification protein
326940	94.7539	0.0296627	0	0.660366	0.132402	12.5456	0	520	77
334159	94.1738	1.61118e-06	0.761768	0.967167	1.39682	131.544	1.06405	1681	523	5.3.1.4	L-arabinose isomerase.	L-arabinose isomerase activity	GO:0008733	KOG0254	Predicted transporter (major facilitator superfamily)	General function prediction only	POORLY CHARACTERIZED	IPR016196	MFS general substrate transporter
338929	94.087	7.13731e-05	0	0.771495	0.0679144	6.38986	0	529	92
365727	93.0266	0.0118438	35.0108	0.202272	0.0581596	5.41039	2.03621	1743	403					KOG4177	Ankyrin	Cell wall/membrane/envelope biogenesis	CELLULAR PROCESSES AND SIGNALING	IPR002110	Ankyrin
293227	90.8885	0.033531	30.1685	0.0833761	0.154871	14.076	4.67222	1768	517
162016	89.5785	0.0323175	2404.78	0	0.03199	2.86562	76.9288	747	249
361978	89.1696	0.00395083	0	0.582915	0.195396	17.4234	0	1315	381					KOG1216	von Willebrand factor and related coagulation proteins	Extracellular structures	CELLULAR PROCESSES AND SIGNALING
318988	88.9139	8.61893e-07	17.0743	0.0286018	1.36779	121.616	23.3542	1364	287	1.-.-.-	Oxidoreductases.	regulation of oxidoreductase activity	GO:0051341	KOG1209	1-Acyl dihydroxyacetone phosphate reductase and related dehydrogenases	Secondary metabolites biosynthesis, transport and catabolism	METABOLISM	IPR016040	NAD(P)-binding
69123	88.6805	0.0183564	0	0.803207	0.0491978	4.36289	0	240	80
360508	88.2432	0.00436863	0	0.691672	0.112526	9.92969	0	1357	390													x
361131	87.2487	0.0148092	0	0.778084	0.0635915	5.54827	0	1995	665	6.3.2.-	Acid--D-amino-acid ligases (peptide synthases).	coenzyme F420-2 alpha-glutamyl ligase activity	GO:0043774	KOG1187	Serine/threonine protein kinase	Signal transduction mechanisms	CELLULAR PROCESSES AND SIGNALING
364753	87.1967	0.0292588	0	0.871518	0.0242881	2.11784	0	1110	370
328608	86.6001	0.0155363	11.9557	0	9.2629	802.168	110.744	2564	723	1.11.1.6	Catalase.	heme binding	GO:0020037	KOG0047	Catalase	Inorganic ion transport and metabolism	METABOLISM	IPR011614	Catalase, N-terminal			x
323394	85.1212	0.0184571	0	0.531942	0.242216	20.6177	0	438	62
307704	83.966	0.0239917	0	0.24101	0.694051	58.2767	0	807	191
315180	83.6335	0.0322524	0	0.477847	0.29648	24.7957	0	434	53			ribonuclease H activity	GO:0004523					IPR012337	Polynucleotidyl transferase, Ribonuclease H fold
364448	83.369	0.00839346	0	0.759919	0.0746421	6.22284	0	876	165
314736	81.2831	0.0469951	0	0.75472	0.076462	6.21507	0	239	56
285467	81.0694	0.017634	0	0.726132	0.0920248	7.4604	0	1035	285	4.2.1.1	Carbonate dehydratase.	zinc ion binding	GO:0008270	KOG0382	Carbonic anhydrase	General function prediction only	POORLY CHARACTERIZED	IPR001148	Carbonic anhydrase, eukaryotic			x	x
220224	80.8358	0.030602	0	0.840808	0.0339295	2.74272	0	348	116					KOG1217	Fibrillins and related proteins containing Ca2+-binding EGF-like domains	Signal transduction mechanisms	CELLULAR PROCESSES AND SIGNALING	IPR002110	Ankyrin
315174	79.211	0.0211189	0	0.401429	0.392875	31.12	0	524	106
323883	76.3228	0.0435129	0	0.319358	0.521063	39.769	0	200	66
348582	75.0171	0.00533001	0	0.694952	0.111875	8.39256	0	690	230
326936	74.8561	0.0425819	0	0.482295	0.290978	21.7815	0	499	128
324854	74.4445	0.00401183	0	0.603828	0.175612	13.0734	0	690	189
336620	73.5617	0.0180258	8.64076	0.0896734	9.98167	734.269	86.2492	514	106									IPR011058	Cyanovirin-N
314002	73.2371	0.0289625	0	0.627945	0.157804	11.5571	0	818	81
337514	73.1934	0.0192767	0	0.646211	0.141042	10.3233	0	297	66
284567	72.2364	0.00150318	0	0.760309	0.073968	5.34318	0	930	254			nucleus	GO:0005634					IPR004875	CENP-B protein
313732	70.6609	0.0318208	0	0.696079	0.110211	7.78761	0	464	153
290078	70.426	0.0170013	0	0.800697	0.0521281	3.67117	0	1654	468
366958	70.3446	0.0207103	4.54535	0.579957	0.094626	6.65643	0.430108	820	253
314920	70.2381	0.0164536	0	0.685509	0.118346	8.31238	0	1058	214									IPR010916	TonB box, conserved site
304367	68.9625	0.0258739	0	0.66361	0.130529	9.00163	0	297	60			ribonuclease H activity	GO:0004523					IPR012337	Polynucleotidyl transferase, Ribonuclease H fold
310376	68.7582	0.0499379	0	0.548633	0.22495	15.4672	0	458	50
365567	68.4656	0.0123542	0	0.829205	0.0395294	2.70641	0	761	139			cell wall	GO:0005618					IPR001338	Fungal hydrophobin			x	x
331167	68.4323	0.0397458	0	0.423442	0.361677	24.7504	0	476	56
326453	67.2448	0.026462	2.23664	0.740467	0.143513	9.65048	0.320986	1372	346	1.1.1.184	Carbonyl reductase (NADPH).	carbonyl reductase (NADPH) activity	GO:0004090	KOG0725	Reductases with broad range of substrate specificities	General function prediction only	POORLY CHARACTERIZED	IPR016040	NAD(P)-binding
314554	66.5759	0.0338043	0	0.726316	0.0907459	6.04148	0	421	61
321153	66.336	0.0347057	0.172303	0.102969	2.58448	171.444	0.445314	495	103
343894	64.596	0.0217601	0	0.774754	0.0646158	4.17392	0	1314	438					KOG4715	SWI/SNF-related matrix-associated actin-dependent regulator of chromatin	Chromatin structure and dynamics	INFORMATION STORAGE AND PROCESSING
323487	64.4641	0.0186052	0	0.522198	0.247217	15.9366	0	698	128
274524	64.4043	0.0155348	4.90575	0.0721002	0.492843	31.7412	2.41776	1182	342									IPR005103	Glycoside hydrolase, family 61	AA9	Lytic polysaccharide monooxygenase (formerly GH61)
343079	64.0659	0.000897414	99.0013	0.0540197	0.0731526	4.68659	7.2422	606	202
177597	63.8713	5.47628e-05	88.0718	4.98061e-13	3.21091	205.085	282.79	1551	517	5.3.1.4	L-arabinose isomerase.	L-arabinose isomerase activity	GO:0008733	KOG0254	Predicted transporter (major facilitator superfamily)	General function prediction only	POORLY CHARACTERIZED	IPR016196	MFS general substrate transporter
336849	63.1276	0.0111061	0	0.643315	0.143089	9.03286	0	434	53
323890	61.9598	0.011924	0	0.530924	0.240581	14.9064	0	432	53			ribonuclease H activity	GO:0004523					IPR012337	Polynucleotidyl transferase, Ribonuclease H fold
320376	61.4203	0.0192009	0	0.387836	0.41196	25.3027	0	352	78
366238	61.3913	0.0065859	0	0.726316	0.093035	5.71154	0	1050	350
303813	60.9803	0.0452783	0	0.22725	0.723558	44.1228	0	741	97			ribonuclease H activity	GO:0004523					IPR012337	Polynucleotidyl transferase, Ribonuclease H fold
321745	60.8941	0.0297829	0	0.544679	0.229752	13.9905	0	313	98
323886	58.6635	0.0247471	0	0.558548	0.214524	12.5847	0	580	102
310721	57.8606	0.0441318	0	0.276686	0.607229	35.1346	0	808	133
314094	57.4909	0.0269318	0	0.507179	0.265894	15.2865	0	434	53			ribonuclease H activity	GO:0004523					IPR012337	Polynucleotidyl transferase, Ribonuclease H fold
364974	56.9826	0.0155443	0	0.717466	0.0976573	5.56476	0	1245	262
315183	56.1309	0.0261389	0	0.552694	0.219955	12.3463	0	439	62
324935	55.8354	0.0475318	0	0.796702	0.0543343	3.03378	0	491	98
341939	55.0001	0.000908965	0	0.631795	0.154459	8.49528	0	1062	354			zinc ion binding	GO:0008270	KOG1721	FOG: Zn-finger	General function prediction only	POORLY CHARACTERIZED	IPR007087	Zinc finger, C2H2-type
339905	54.8367	0.0493198	0	0.325746	0.508177	27.8667	0	680	101
309615	53.6941	4.96316e-06	49.7716	0.00445711	1.65822	89.0367	82.5324	969	249
307445	53.3082	0.00964289	0	0.309837	0.538098	28.6851	0	306	75
349083	52.8876	0.0166423	0	0.804171	0.0500085	2.64483	0	1185	395					KOG4475	FOG: Immunoglobin and related proteins	General function prediction only	POORLY CHARACTERIZED
328576	52.7892	0.000447716	0	0.568766	0.205507	10.8485	0	1068	168					KOG4297	C-type lectin	Signal transduction mechanisms	CELLULAR PROCESSES AND SIGNALING
97332	51.9754	0.0381658	0	0.798499	0.0546248	2.83915	0	159	53
315168	51.9609	0.0350501	2.02441	0.674447	0.256676	13.3372	0.51962	1413	252			proteolysis	GO:0006508					IPR009007	Peptidase aspartic, catalytic
345396	51.7067	0.0269172	0	0.817472	0.0451055	2.33226	0	516	172
344298	51.6334	0.0344131	6.64667	0.343112	0.13562	7.00255	0.901425	1128	376
27630	51.4265	0.00587535	0	0.0762615	43.5553	2239.9	0	219	73
108495	51.1824	0.0395029	0	0.376813	0.426373	21.8228	0	168	56
322059	50.9586	0.0113894	0	0.624413	0.159524	8.12909	0	1229	236
343197	50.9266	0.0247046	0	0.684296	0.118073	6.01304	0	885	295
363829	49.8522	0.00322825	0	0.640424	0.147149	7.33568	0	2193	667			protein dimerization activity	GO:0046983					IPR004827	Basic-leucine zipper (bZIP) transcription factor
339843	49.3745	0.017151	0	0.553264	0.218975	10.8118	0	204	68
357811	49.355	0.0130469	1.83394	0.870517	0.0627588	3.09746	0.115096	2129	684			RNA binding	GO:0003723	KOG0119	Splicing factor 1/branch point binding protein (RRM superfamily)	RNA processing and modification	INFORMATION STORAGE AND PROCESSING	IPR001878	Zinc finger, CCHC-type
176778	49.1685	0.0376959	47.6763	0.0523538	0.186382	9.16411	8.88601	708	236					KOG4412	26S proteasome regulatory complex, subunit PSMD10	Posttranslational modification, protein turnover, chaperones	CELLULAR PROCESSES AND SIGNALING	IPR002110	Ankyrin
308679	49.1625	0.0325831	0	0.640159	0.15066	7.40683	0	434	53
323489	49.0001	0.0497896	0	0.764151	0.0712677	3.49213	0	430	98
285974	48.7883	0.0190859	0	0.802	0.051742	2.5244	0	803	190
323807	47.6308	0.00916464	0	0.461534	0.313576	14.9358	0	551	98
303910	47.3859	0.0205884	0	0.729295	0.0904344	4.28532	0	295	89
347551	47.2926	0.000331451	0.536748	0.909799	0.194634	9.20474	0.104469	1266	422					KOG4462	WASP-interacting protein VRP1/WIP, contains WH2 domain	Cytoskeleton	CELLULAR PROCESSES AND SIGNALING
335625	47.0311	0.018621	0	0.550378	0.225662	10.6131	0	331	95			nucleic acid binding	GO:0003676					IPR012337	Polynucleotidyl transferase, Ribonuclease H fold
278654	46.6574	0.047339	0	0.829639	0.0400278	1.86759	0	519	102
349056	46.5776	0.00163085	0	0.701447	0.106141	4.94382	0	900	300
366391	46.4676	0.0212787	0	0.798316	0.0532558	2.47467	0	681	189
303919	46.2365	0.0364171	0	0.764151	0.0697956	3.2271	0	431	89
356228	45.7584	0.0296832	78.0547	0.00299476	0.378331	17.3119	29.5305	1230	363			carbon-sulfur lyase activity	GO:0016846					IPR006913	Glutathione-dependent formaldehyde-activating, GFA
317947	45.7582	0.0214291	0	0.684896	0.118091	5.40365	0	423	67
313722	45.6048	0.0143516	0	0.498446	0.27887	12.7178	0	150	50
307737	45.5216	0.000481129	7.93153	3.81896e-10	93.3696	4250.33	740.564	1575	309			cysteine biosynthetic process	GO:0019344	KOG0189	Phosphoadenosine phosphosulfate reductase	Amino acid transport and metabolism	METABOLISM	IPR011800	Phosphoadenosine phosphosulphate reductase thioredoxin
341540	44.378	0	6.2865	0.00060007	30.0501	1333.56	188.91	771	257			protein dimerization activity	GO:0046983	KOG1414	Transcriptional activator FOSB/c-Fos and related bZIP transcription factors	Transcription	INFORMATION STORAGE AND PROCESSING	IPR004827	Basic-leucine zipper (bZIP) transcription factor
304669	43.6999	0.0469254	12.0191	1.0378e-05	177.439	7754.08	2132.66	1185	204			negative regulation of transcription	GO:0016481	KOG3135	1,4-benzoquinone reductase-like; Trp repressor binding protein-like/protoplast-secreted protein	General function prediction only	POORLY CHARACTERIZED	IPR008254	Flavodoxin/nitric oxide synthase	AA6	Benzoquinone reductase
335965	43.5796	0.0327023	0	0.37549	0.43275	18.8591	0	433	53			nucleic acid binding	GO:0003676					IPR012337	Polynucleotidyl transferase, Ribonuclease H fold
167790	43.2384	0.00877934	0	0.0324567	1.98582	85.8638	0	768	256											AA11	Lytic polysaccharide monooxygenase	x
339844	41.8612	0.000492493	0	0.623691	0.160653	6.72514	0	189	63
314837	41.7423	0.0039168	0	0.378452	0.428236	17.8756	0	901	131
333975	41.2167	0.035339	0	0.295215	0.56869	23.4395	0	318	78
326220	40.6144	0.0306619	0	0.603604	0.176596	7.17236	0	585	77			ribonuclease H activity	GO:0004523					IPR002156	Ribonuclease H
361263	40.5373	0.0170609	0	0.418026	0.368508	14.9383	0	934	295
361033	40.1263	0.00908731	0	0.7502	0.0787454	3.15976	0	2510	726
365466	39.8331	0.0103966	0	0.686845	0.11466	4.56726	0	2962	976					KOG1721	FOG: Zn-finger	General function prediction only	POORLY CHARACTERIZED
336845	39.6443	0.0482691	0	0.778084	0.0644307	2.55431	0	192	64
366945	38.7602	0.0370858	0	0.73658	0.0851454	3.30025	0	1914	600
344215	38.3952	0.019146	0	0.423442	0.364275	13.9864	0	684	228					KOG3712	RFX family transcription factor	Transcription	INFORMATION STORAGE AND PROCESSING
342964	38.2852	0.00994062	0	0.389279	0.40978	15.6885	0	4560	1520					KOG0118	FOG: RRM domain	General function prediction only	POORLY CHARACTERIZED	IPR011046	WD40 repeat-like
362814	38.2047	0.00611045	0	0.552775	0.220827	8.43661	0	1451	428			neuropeptide signaling pathway	GO:0007218					IPR001484	Pyrokinin, conserved site
314558	37.5343	0.025639	0	0.369789	0.431814	16.2078	0	153	51
76587	36.8858	0.0276937	0	0.320994	0.516445	19.0495	0	648	216									IPR011009	Protein kinase-like
321378	36.6234	0.0308409	0	0.553244	0.222469	8.14756	0	396	59
307682	36.4388	0.0127119	0	0.0720413	1.43865	52.4226	0	859	168
325468	36.3064	0.0451605	0	0.520472	0.252543	9.1689	0	356	74
232199	35.8051	0.0296627	0	0.756313	0.075872	2.71661	0	870	290			nucleus	GO:0005634					IPR004875	CENP-B protein
331756	34.9852	0.0023227	4.29068	0.517497	0.250679	8.77007	1.07559	444	89
189428	34.94	0.00149349	0	0.419222	0.367422	12.8377	0	558	186					KOG1187	Serine/threonine protein kinase	Signal transduction mechanisms	CELLULAR PROCESSES AND SIGNALING
310379	34.6373	0.042533	0	0.566929	0.207647	7.19232	0	785	120
323396	34.1961	0.0146734	0	0.182929	0.846737	28.9551	0	435	61
305007	33.9992	0.016633	0	0.636609	0.150759	5.1257	0	741	149													x	x
331631	33.8972	0.0196041	0	0.464714	0.31362	10.6308	0	179	59			ribonuclease H activity	GO:0004523					IPR012337	Polynucleotidyl transferase, Ribonuclease H fold
362960	33.5643	0.0236883	1.12584	0.953009	0.115673	3.88249	0.130229	2352	686
216764	33.3626	0.0163004	3.97583	0.34743	0.229092	7.6431	0.91083	1941	647			transcription	GO:0006350					IPR001138	Fungal transcriptional regulatory protein, N-terminal
337410	33.3193	0.0419668	0	0.678601	0.121823	4.05905	0	369	88
362761	33.2021	0.0188327	0	0.75532	0.0773201	2.56719	0	718	195			zinc ion binding	GO:0008270					IPR001841	Zinc finger, RING-type
80786	33.202	0.0131486	0	0.739619	0.0849186	2.81947	0	387	129			nucleus	GO:0005634					IPR004875	CENP-B protein
343976	33.0012	0.00890663	0	0.612975	0.168476	5.5599	0	1386	462
322439	32.9997	0.0363872	0	0.762755	0.072597	2.39568	0	491	98
305200	32.9399	0.0105283	0	0.72727	0.0911389	3.0021	0	728	116			zinc ion binding	GO:0008270					IPR006025	Peptidase M, neutral zinc metallopeptidases, zinc-binding site
318701	32.8633	0.0364171	3.04145	0.634194	0.165848	5.4503	0.504418	437	133
316603	32.3117	0	0.908677	0.437782	157.971	5104.3	143.544	1245	308	4.-.-.-	Lyases.	regulation of lyase activity	GO:0051339	KOG1606	Stationary phase-induced protein, SOR/SNZ family	Coenzyme transport and metabolism	METABOLISM	IPR011060	Ribulose-phosphate binding barrel
341495	32.1604	0.0253752	169.868	9.35328e-12	0.487257	15.6704	82.7693	915	305
287293	32.1105	2.17336e-13	24.8726	0	5.02365	161.312	124.951	735	236									IPR017853	Glycoside hydrolase, catalytic core	GH25	Glycoside Hydrolase Family 25 protein	x
338303	31.4553	0.00173862	0	1.00585e-05	7.47913	235.259	0	385	66
325033	30.8953	0.010972	0.520611	0.562582	2.41354	74.5672	1.25652	1237	345					KOG4177	Ankyrin	Cell wall/membrane/envelope biogenesis	CELLULAR PROCESSES AND SIGNALING	IPR002110	Ankyrin
313764	30.6796	0.00671672	0	0.23125	0.715256	21.9438	0	336	75
307164	30.1809	0.00539539	5.34341	1.25759e-05	2.73456	82.5315	14.6119	1684	410			catalytic activity	GO:0003824					IPR008928	Six-hairpin glycosidase-like	GH76	Glycoside Hydrolase Family 76 protein
328845	29.446	0.0344474	0	0.501432	0.268975	7.92023	0	421	55
314542	29.4174	0.0386322	0	0.379557	0.423735	12.4652	0	273	88			ribonuclease H activity	GO:0004523					IPR012337	Polynucleotidyl transferase, Ribonuclease H fold
362453	29.3736	0.0366906	3.18028	0.617822	0.349687	10.2716	1.1121	858	203
332719	29.0774	0.0289972	0	0.418026	0.370929	10.7857	0	348	96
359238	28.9804	0.0156684	2.81042	0.487407	0.262694	7.61298	0.738281	1247	155			cell wall	GO:0005618					IPR001338	Fungal hydrophobin			x	x
332699	28.8953	0.0339844	12.5885	2.57894e-07	8.70929	251.657	109.636	1317	326			catalytic activity	GO:0003824					IPR011330	Glycoside hydrolase/deacetylase, beta/alpha-barrel
331088	28.8009	0.0278844	0.256367	0.364135	1.27259	36.6518	0.326251	1532	316			membrane	GO:0016020					IPR003092	Potassium channel, two pore-domain, TASK
317942	28.7683	0.0387977	0	0.529318	0.243576	7.00727	0	429	100
360371	28.7365	0.0106888	338.86	0.083306	0.295021	8.47787	99.9708	1250	310			phospholipid biosynthetic process	GO:0008654	KOG2419	Phosphatidylserine decarboxylase	Lipid transport and metabolism	METABOLISM	IPR003817	Phosphatidylserine decarboxylase-related
342412	28.5831	0.00881277	0	0.395298	0.39562	11.308	0	495	165
323481	28.5286	0.0111577	0	0.159505	0.942282	26.882	0	233	77
342718	28.5201	0.0456294	0	0.762925	0.071713	2.04526	0	900	300
306821	28.2362	1.3843e-08	3.84735	2.16251e-14	33.704	951.671	129.671	1568	343	3.1.3.7	3'(2'),5'-bisphosphate nucleotidase.	3'(2'),5'-bisphosphate nucleotidase activity	GO:0008441	KOG1528	Salt-sensitive 3'-phosphoadenosine-5'-phosphatase HAL2/SAL1	Inorganic ion transport and metabolism	METABOLISM	IPR000760	Inositol monophosphatase
339907	27.9895	0.000306098	55.2393	3.22571e-07	25.0463	701.032	1383.54	3575	1080	1.11.1.7	Peroxidase.	response to oxidative stress	GO:0006979	KOG2408	Peroxidase/oxygenase	General function prediction only	POORLY CHARACTERIZED	IPR001128	Cytochrome P450
160122	27.7512	0	3.58504	0.0838457	38.2949	1062.73	137.289	3432	1144			metabolic process	GO:0008152	KOG1158	NADP/FAD dependent oxidoreductase	Energy production and conversion	METABOLISM	IPR002869	Pyruvate ferredoxin/flavodoxin oxidoreductase
327411	27.4602	0.0212536	4.51578	6.84715e-08	15.5153	426.054	70.064	2037	524			integral to membrane	GO:0016021	KOG0255	Synaptic vesicle transporter SVOP and related transporters (major facilitator superfamily)	General function prediction only	POORLY CHARACTERIZED	IPR016196	MFS general substrate transporter
288696	27.4031	0.0251717	9.6888	0	42.1124	1154.01	408.019	3114	827			integral to membrane	GO:0016021	KOG0236	Sulfate/bicarbonate/oxalate exchanger SAT-1 and related transporters (SLC26 family)	Inorganic ion transport and metabolism	METABOLISM	IPR002645	Sulphate transporter/antisigma-factor antagonist STAS
364756	27.1685	0.0174715	0	0.643149	0.142333	3.86699	0	875	204
346765	26.9051	0.049905	0	0.753432	0.0778054	2.09336	0	426	142
365706	26.602	0.00301514	0	0.50411	0.272465	7.2481	0	1372	355			zinc ion binding	GO:0008270	KOG1721	FOG: Zn-finger	General function prediction only	POORLY CHARACTERIZED	IPR007087	Zinc finger, C2H2-type
367289	25.8971	0.000681	25.9685	0.000331987	19.8545	514.175	515.593	994	298
208891	25.7698	0.0131161	1.64159	6.88332e-05	148.965	3838.8	244.54	1188	396	3.5.3.11	Agmatinase.	agmatinase activity	GO:0008783	KOG2964	Arginase family protein	Amino acid transport and metabolism	METABOLISM	IPR006035	Ureohydrolase			x
363475	25.2401	0.0137312	76.8908	1.45266e-06	0.117908	2.976	9.06602	6348	2116			binding	GO:0005488	KOG1202	Animal-type fatty acid synthase and related proteins	Lipid transport and metabolism	METABOLISM	IPR016036	Malonyl-CoA ACP transacylase, ACP-binding
366748	24.8503	0.0367528	0	0.729505	0.0892516	2.21793	0	2191	666			zinc ion binding	GO:0008270	KOG4297	C-type lectin	Signal transduction mechanisms	CELLULAR PROCESSES AND SIGNALING	IPR007087	Zinc finger, C2H2-type
327171	24.8379	0.0235365	1.91408	0.739619	0.284909	7.07654	0.545339	674	209
274575	24.5739	0.0275231	0	0.705343	0.103557	2.54481	0	803	168			nucleic acid binding	GO:0003676	KOG0118	FOG: RRM domain	General function prediction only	POORLY CHARACTERIZED	IPR000504	RNA recognition motif, RNP-1
337926	24.3577	0.0340107	0.734168	0.911208	3.81361	92.891	2.79983	430	77
340844	24.1714	0.0015512	5.81088	4.14182e-06	69.0256	1668.44	401.1	702	234
180483	24.163	0.0184784	5.35654	0.546036	0.186726	4.51186	1.00021	573	191													x	x
323896	24.0699	0.0358127	0	0.389811	0.409	9.84462	0	432	61
308161	23.9178	0.00491922	0.750934	1	0.249823	5.9752	0.1876	705	175
316254	23.6967	0.00873271	0	0.0538185	1.64348	38.9451	0	720	240
326942	23.0984	0.0204128	0	0.158265	0.946355	21.8593	0	457	61
331522	22.9097	0.00568564	2.12358	0.113799	2.04449	46.8387	4.34164	811	162													x	x
345410	22.744	0.00629151	0	0.540975	0.233564	5.31218	0	1458	486
307433	22.1838	0.0278102	0	0.207855	0.780481	17.314	0	428	61
338672	21.9959	1.26704e-07	8.80573	0	32.1547	707.27	283.145	374	56
232632	21.9107	5.48967e-09	21.0615	3.03967e-09	22.6152	495.515	476.309	2085	695	3.2.1.18	Exo-alpha-sialidase.	exo-alpha-sialidase activity	GO:0004308	KOG0260	RNA polymerase II, large subunit	Transcription	INFORMATION STORAGE AND PROCESSING	IPR008967	p53-like transcription factor, DNA-binding
316993	21.6485	0.0338662	0	0.595272	0.185043	4.0059	0	457	77			ribonuclease H activity	GO:0004523					IPR002156	Ribonuclease H
317558	21.5879	0.000137952	0.1817	3.99405e-19	69.5136	1500.65	12.6307	1817	397	1.-.-.-	Oxidoreductases.	regulation of oxidoreductase activity	GO:0051341					IPR003819	Taurine catabolism dioxygenase TauD/TfdA
354279	21.4317	0.00478264	0	0.0388193	5.44643	116.726	0	282	94
186523	21.4135	0.0105236	0	0.55931	0.213863	4.57956	0	741	247
313694	21.3138	0.0154887	0	0.106499	1.19204	25.4069	0	455	65
350233	21.1303	0.000469097	0.324098	0.0139129	39.68	838.448	12.8602	207	69
361665	20.94	0.00598208	0	0.0502722	1.68999	35.3883	0	1064	234			nucleus	GO:0005634	KOG2084	Predicted histone tail methylase containing SET domain	Chromatin structure and dynamics	INFORMATION STORAGE AND PROCESSING	IPR001214	SET
366389	20.8711	0.02833	0	0.685455	0.117332	2.44884	0	623	165
366096	20.6655	0.00197399	0	0.523399	0.249344	5.15283	0	438	98
307169	20.2925	0.0241267	1.1648	0.477847	168.197	3413.13	195.915	1122	201	1.8.4.6	Protein-methionine-S-oxide reductase. Peptide methionine sulfoxide reductase. Peptide Met(O) reductase.	protein metabolic process	GO:0019538	KOG1635	Peptide methionine sulfoxide reductase	Posttranslational modification, protein turnover, chaperones	CELLULAR PROCESSES AND SIGNALING	IPR002569	Methionine sulphoxide reductase A
367082	20.2851	2.67259e-06	34.0429	4.83622e-05	3.30226	66.9867	112.419	1162	289
327855	20.1453	0.000102696	0.0569545	3.1055e-25	919.797	18529.6	52.3866	350	104									IPR010987	Glutathione S-transferase, C-terminal-like
332720	19.8128	0.0349514	0	0.305744	0.549085	10.8789	0	423	68
338078	19.5952	1.21935e-10	1.98538	5.05413e-12	39.8972	781.794	79.2112	1347	339	3.1.30.-	Endoribonucleases active with either ribo- or deoxyribonucleic	endonuclease activity	GO:0004519	KOG3721	Mitochondrial endonuclease	Nucleotide transport and metabolism	METABOLISM	IPR001604	DNA/RNA non-specific endonuclease			x
278922	19.434	0.0274987	2.51408	0.685795	0.147858	2.87346	0.371725	1086	241
191837	19.2175	0.0018471	64.7209	1.57013e-14	1.38937	26.7002	89.9214	1038	346			cell wall modification	GO:0042545					IPR011050	Pectin lyase fold/virulence factor	CE8	Carbohydrate Esterase Family 8 protein	x
338723	18.9231	0.036751	0	0.214029	0.766024	14.4956	0	451	66
364574	18.6484	0.0355317	0	0.308538	0.542513	10.117	0	611	163
340980	18.5927	0.0228054	0	0.465	0.310213	5.76768	0	402	134
302062	17.9963	1.927e-05	2.27823	3.14359e-06	30.8124	554.51	70.1976	3351	935			transcription	GO:0006350					IPR001138	Fungal transcriptional regulatory protein, N-terminal
334829	17.9172	0.00375782	0	0.0100996	2.76534	49.5471	0	1008	196
325175	17.7704	2.69709e-06	4.65391	7.0946e-10	87.8851	1561.75	409.01	610	54
317630	17.6067	0.0325285	0	0.411021	0.38152	6.71733	0	682	128
283913	17.4858	1.52813e-06	33.9583	0.140793	1.14332	19.9918	38.8252	1124	307			transition metal ion binding	GO:0046914					IPR009078	Ferritin/ribonucleotide reductase-like			x
337836	17.2966	0.0465062	0.0290104	0.0818836	1.53339	26.5224	0.0444842	825	114			transcription initiation from RNA polymerase II promoter	GO:0006367	KOG3463	Transcription initiation factor IIA, gamma subunit	Transcription	INFORMATION STORAGE AND PROCESSING	IPR009088	Transcription factor IIA, beta-barrel
357024	17.1294	0.0413989	0	0.572248	0.200989	3.44283	0	1479	493					KOG1424	Predicted GTP-binding protein MMR1	General function prediction only	POORLY CHARACTERIZED
349789	16.6813	0.0294922	0	0.488598	0.286707	4.78265	0	1716	572			helicase activity	GO:0004386	KOG0335	ATP-dependent RNA helicase	RNA processing and modification	INFORMATION STORAGE AND PROCESSING	IPR000629	RNA helicase, ATP-dependent, DEAD-box, conserved site
317608	16.637	7.81896e-05	0	0.306155	0.546809	9.09727	0	841	111
308059	16.3954	0.039188	0	0.074785	1.42312	23.3327	0	358	58
192545	16.386	0.0238637	0.211006	0.0903623	4.41186	72.2925	0.930928	663	221			translation	GO:0006412	KOG0857	60s ribosomal protein L10	Translation, ribosomal structure and biogenesis	INFORMATION STORAGE AND PROCESSING	IPR016180	Ribosomal protein L10e/L16
364755	16.1065	0.0153537	1.09308	0.913842	0.614734	9.90123	0.671953	1094	351
234172	16.0725	0	0.585017	0.00644078	63.423	1019.36	37.1035	1185	395
322141	16.0023	3.1932e-05	1.91361	0.424515	1.80192	28.8349	3.44817	394	64
361370	15.9872	0.000800597	0	0.408513	0.384271	6.14341	0	997	211					KOG0613	Projectin/twitchin and related proteins	Cytoskeleton	CELLULAR PROCESSES AND SIGNALING
305386	15.8529	0.000418142	1.61797	0.00466299	12.601	199.763	20.3881	2009	577			integral to membrane	GO:0016021	KOG2722	Predicted membrane protein	Function unknown	POORLY CHARACTERIZED	IPR004776	Auxin efflux carrier
360847	15.675	0.0162795	0.425303	0.654065	0.970279	15.2091	0.412662	1334	320			oxidoreductase activity	GO:0016491					IPR008972	Cupredoxin
156714	15.5576	1.00786e-07	8.72288	0	60.7058	944.439	529.529	1134	378			zinc ion binding	GO:0008270	KOG1721	FOG: Zn-finger	General function prediction only	POORLY CHARACTERIZED	IPR007087	Zinc finger, C2H2-type
362631	15.4422	0.00856515	0	0.0884302	1.29884	20.057	0	1137	306
359331	15.1118	0.019146	1.40219	0.0618637	46.5882	704.033	65.3253	1737	579									IPR002110	Ankyrin
316973	15.0993	0.0413998	0	0.628439	0.159356	2.40616	0	317	103
282906	14.7717	0.00473383	1.03469	0.905697	0.661952	9.77816	0.684914	2788	825			nucleic acid binding	GO:0003676	KOG1041	Translation initiation factor 2C (eIF-2C) and related proteins	Translation, ribosomal structure and biogenesis	INFORMATION STORAGE AND PROCESSING	IPR012337	Polynucleotidyl transferase, Ribonuclease H fold
278668	14.3803	0.00720277	0.279755	0.40561	1.21467	17.4673	0.33981	1620	518			catalytic activity	GO:0003824					IPR009003	Peptidase, trypsin-like serine and cysteine
186723	14.2054	0.0271185	3.41629	0.485375	0.192579	2.73567	0.657907	1704	568			ATP binding	GO:0005524	KOG0101	Molecular chaperones HSP70/HSC70, HSP70 superfamily	Posttranslational modification, protein turnover, chaperones	CELLULAR PROCESSES AND SIGNALING	IPR001023	Heat shock protein Hsp70
347612	14.1751	0.027175	0	0.551687	0.221287	3.13676	0	513	171													x	x
275219	14.0381	0.0352849	590.006	0.000144166	0.174974	2.45631	103.236	2346	782			methylation	GO:0032259					IPR002052	N-6 adenine-specific DNA methylase, conserved site
339835	13.9928	0.0252637	0.216369	0.139845	3.01411	42.176	0.652161	676	57
349256	13.9789	4.94164e-09	0.440792	0.113585	327.368	4576.23	144.301	1236	412	4.4.1.1	Cystathionine gamma-lyase.	cystathionine gamma-lyase activity	GO:0004123	KOG0053	Cystathionine beta-lyases/cystathionine gamma-synthases	Amino acid transport and metabolism	METABOLISM	IPR015424	Pyridoxal phosphate-dependent transferase, major region
356464	13.783	0.0040409	214.033	0.00514018	0.309147	4.26097	66.1678	1973	537			oxidoreductase activity	GO:0016491					IPR008972	Cupredoxin			x
343825	13.6632	3.8911e-07	0	0.184697	0.859289	11.7407	0	306	102
343260	13.6488	0.0166115	1.69663	0.764151	0.679655	9.27646	1.15312	732	244
362515	13.5978	0.00835601	3.80446	0.199119	0.897441	12.2032	3.41428	955	305					KOG3544	Collagens (type IV and type XIII), and related proteins	Extracellular structures	CELLULAR PROCESSES AND SIGNALING	IPR000420	Yeast PIR protein repeat			x
363066	13.5892	0.0106424	0	0.482652	0.292639	3.97674	0	1061	320
291039	13.388	0	144.865	0	7.48421	100.199	1084.2	1930	412					KOG2766	Predicted membrane protein	Function unknown	POORLY CHARACTERIZED	IPR009262	Protein of unknown function DUF914, eukaryotic
189106	13.3061	1.112e-05	40.8653	1.37819e-11	10.5895	140.905	432.744	1716	572			transport	GO:0006810	KOG1286	Amino acid transporters	Amino acid transport and metabolism	METABOLISM	IPR004840	Amino acid permease, conserved site
332509	13.2907	0.021223	1.8273	0.751201	0.397702	5.28572	0.726721	606	161
272820	13.2777	0.0367649	613.806	0	0.183808	2.44054	112.822	819	273			hydrolase activity, acting on ester bonds	GO:0016788					IPR013830	Esterase, SGNH hydrolase-type	CE12	Carbohydrate Esterase Family 12 protein	x
284584	13.2551	0.000821462	23.787	0	2.36614	31.3633	56.2834	2206	676			membrane	GO:0016020	KOG1289	Amino acid transporters	Amino acid transport and metabolism	METABOLISM	IPR004841	Amino acid permease-associated region
26485	13.2152	0.041916	0	0.311938	0.532968	7.04328	0	408	136
334754	13.2016	0.0331749	0	1.7365e-05	7.08071	93.477	0	344	102
362382	13.1074	0.0344131	0.216052	0.508432	0.637168	8.35164	0.137661	1281	356
345897	12.9625	0.047453	0	0.511595	0.260027	3.37061	0	945	315
348608	12.8006	0.0227109	0	0.00598685	3.11879	39.9225	0	315	105
334973	12.5935	0.036967	0	0.313438	0.53469	6.73364	0	1052	165
276080	12.4713	0.0198521	5.61848	0.0214828	10.2608	127.966	57.6503	1729	490					KOG3599	Ca2+-modulated nonselective cation channel polycystin	Inorganic ion transport and metabolism	METABOLISM
312383	12.4224	0.0105224	4.36494	0.56683	0.29087	3.61332	1.26963	386	62
312722	12.3315	0.00755755	0	0.253633	0.66894	8.24906	0	177	59
340603	12.1739	0.0331055	15.9713	0.0321467	0.487793	5.93836	7.79071	1683	561					KOG2992	Nucleolar GTPase/ATPase p130	Nuclear structure	CELLULAR PROCESSES AND SIGNALING
136602	12.0708	0.000814014	3.99906	0.183934	2.13902	25.8198	8.55407	207	69			FAD binding	GO:0050660					IPR016166	FAD-binding, type 2
358742	11.7199	0.00818521	1.14535	0.658288	45.8808	537.718	52.5496	978	278	1.5.1.2	Pyrroline-5-carboxylate reductase.	metabolic process	GO:0008152	KOG3124	Pyrroline-5-carboxylate reductase	Amino acid transport and metabolism	METABOLISM	IPR016040	NAD(P)-binding
346972	11.6899	0.0152627	0	0.45247	0.325177	3.8013	0	1578	526
56423	11.5862	9.44093e-10	0.427475	0.137988	11.7548	136.193	5.02487	474	158					KOG4177	Ankyrin	Cell wall/membrane/envelope biogenesis	CELLULAR PROCESSES AND SIGNALING	IPR002110	Ankyrin
309484	11.3848	0.00547847	2.59733	0.000148177	6.15207	70.0403	15.979	1673	478
325888	11.3469	0.00903466	0.222487	0.131547	3.22103	36.5487	0.716638	973	183
340853	11.2511	0.0331545	0	0.538105	0.23387	2.63129	0	972	324
358957	11.1832	1.68828e-09	0.646827	0.314876	18.4896	206.774	11.9596	2881	859									IPR012939	Glycosyl hydrolase 92	GH92	Glycoside Hydrolase Family 92 protein
332264	11.0632	0.000493525	0.105211	1.69707e-14	40.0428	443.002	4.21296	508	53
367177	11.048	0.0139731	4.93166	0.0580745	0.537883	5.94254	2.65266	971	300
363649	10.8194	0.0393157	0	0.406639	0.383371	4.14785	0	1685	525
334719	10.6988	0.0316056	0	0.00303201	3.56345	38.1246	0	450	63
329971	10.5259	0.00391185	1.03991	0.0969483	162.955	1715.25	169.459	1836	321	2.7.6.1	Ribose-phosphate pyrophosphokinase.	nucleotide biosynthetic process	GO:0009165	KOG1448	Ribose-phosphate pyrophosphokinase	Nucleotide transport and metabolism	METABOLISM	IPR000842	Phosphoribosyl pyrophosphate synthetase, conserved site
329255	10.4412	0.0195599	0	3.11394e-10	19.1632	200.086	0	594	119
348078	10.3194	3.27513e-05	0.960713	0.72011	27.8599	287.498	26.7653	1041	347									IPR003105	SRA-YDG
344790	10.255	0.0437395	0	0.535406	0.236222	2.42245	0	792	264			unfolded protein binding	GO:0051082	KOG0364	Chaperonin complex component, TCP-1 gamma subunit (CCT3)	Posttranslational modification, protein turnover, chaperones	CELLULAR PROCESSES AND SIGNALING	IPR008950	GroEL-like chaperone, ATPase
323351	10.2492	0.0381574	0.368948	7.0179e-06	1079.63	11065.4	398.328	339	58			integral to membrane	GO:0016021	KOG1773	Stress responsive protein	General function prediction only	POORLY CHARACTERIZED	IPR000612	Protein of unknown function UPF0057
357649	10.2417	0.021321	1.10815	0.563939	260.48	2667.76	288.651	1578	263			metabolic process	GO:0008152					IPR016181	Acyl-CoA N-acyltransferase
364650	10.1263	0.00184578	16.3934	1.13971e-05	0.522939	5.29543	8.57274	1422	321			ATP binding	GO:0005524	KOG0744	AAA+-type ATPase	Posttranslational modification, protein turnover, chaperones	CELLULAR PROCESSES AND SIGNALING	IPR003960	AAA ATPase, conserved site
356458	10.093	0.00350371	3.21777	0.002777	54.1312	546.345	174.182	1633	346			protein binding	GO:0005515					IPR000210	BTB/POZ-like
319755	10.0864	0.0194034	4.12176	0	74.7534	753.994	308.115	795	149									IPR009009	Barwin-related endoglucanase			x	x
332263	10.0543	0.00173862	1.48024	0.0890178	96.3422	968.654	142.609	1336	383	2.5.1.6	Methionine adenosyltransferase.	methionine adenosyltransferase regulator activity	GO:0048270	KOG1506	S-adenosylmethionine synthetase	Coenzyme transport and metabolism	METABOLISM	IPR002133	S-adenosylmethionine synthetase
331963	10.0493	0.008483	0	0.335318	0.494163	4.96599	0	320	79
358602	9.97369	0.0239215	0.0711286	1.02499e-32	66.0734	658.996	4.69971	759	163			cell redox homeostasis	GO:0045454	KOG0907	Thioredoxin	Posttranslational modification, protein turnover, chaperones	CELLULAR PROCESSES AND SIGNALING	IPR012336	Thioredoxin-like fold
342460	9.94824	0	1.84359	0.116067	3.20504	31.8845	5.90878	3144	1048			ATP binding	GO:0005524	KOG1911	Heterochromatin-associated protein HP1 and related CHROMO domain proteins	Chromatin structure and dynamics	INFORMATION STORAGE AND PROCESSING	IPR003593	AAA+ ATPase, core
358629	9.7593	0.0228997	0.0473221	2.14449e-05	154.337	1506.22	7.30356	2492	757	1.11.1.6	Catalase.	heme binding	GO:0020037	KOG0047	Catalase	Inorganic ion transport and metabolism	METABOLISM	IPR011614	Catalase, N-terminal
168609	9.56335	0.00183897	1.42395	0.00474779	90.3806	864.341	128.697	1014	338			oxidoreductase activity	GO:0016491	KOG0143	Iron/ascorbate family oxidoreductases	General function prediction only	POORLY CHARACTERIZED	IPR005123	2OG-Fe(II) oxygenase
224630	9.4993	0.0303302	5.75859	0.0107888	4.11914	39.129	23.7204	504	168			metabolic process	GO:0008152					IPR016181	Acyl-CoA N-acyltransferase
352796	9.49442	0.0320942	1.45904	0.0492803	12.6581	120.182	18.4687	999	333					KOG2478	Putative RNA polymerase II regulator	Transcription	INFORMATION STORAGE AND PROCESSING
37075	9.46773	0.0419621	0.0433337	6.64629e-08	23.5357	222.83	1.01989	816	272	3.5.1.-	In linear amides.	N-acetylgalactosamine-6-phosphate deacetylase activity	GO:0047419	KOG2682	NAD-dependent histone deacetylases and class I sirtuins (SIR2 family)	Chromatin structure and dynamics	INFORMATION STORAGE AND PROCESSING	IPR003000	NAD-dependent histone deacetylase, silent information regulator Sir2
366942	9.42355	0.0312984	0	0.186357	0.834044	7.85965	0	1015	311
309144	9.22777	0.00388171	17.4319	2.07004e-09	92.3583	852.262	1609.98	1343	170
305632	9.0032	0.000710695	0.186157	0.0965956	2.99501	26.9647	0.55754	879	226
366523	8.97808	0.0438102	17.1584	0.0642994	4.71038	42.2901	80.8226	2133	561
363413	8.88435	6.14327e-05	0.0875259	0.244174	0.964003	8.56454	0.0843753	1045	329
348227	8.84314	0.0371057	5.17058	0	12.2643	108.455	63.4136	1359	453
186641	8.82166	0.0221186	4.86627	0.0107064	0.932522	8.22639	4.5379	1707	569			ATP binding	GO:0005524	KOG0101	Molecular chaperones HSP70/HSC70, HSP70 superfamily	Posttranslational modification, protein turnover, chaperones	CELLULAR PROCESSES AND SIGNALING	IPR001023	Heat shock protein Hsp70
365968	8.75269	0.0262408	0	0.431983	0.344101	3.01181	0	1272	424
355795	8.71737	0.000558575	0.870584	0.948285	25.8322	225.189	22.4891	4319	1273			membrane	GO:0016020	KOG1933	Cholesterol transport protein (Niemann-Pick C disease protein)	Lipid transport and metabolism	METABOLISM	IPR000152	Aspartic acid and asparagine hydroxylation site
355705	8.61584	0.000109627	34.6647	0	2.496	21.5051	86.5231	1899	570	6.2.1.12	4-coumarate--CoA ligase.	4-coumarate-CoA ligase activity	GO:0016207	KOG1176	Acyl-CoA synthetase	Lipid transport and metabolism	METABOLISM	IPR000873	AMP-dependent synthetase and ligase
284522	8.55669	0.00114181	6.64872	7.98892e-06	1.68065	14.3808	11.1742	1701	437			transcription	GO:0006350					IPR001138	Fungal transcriptional regulatory protein, N-terminal
363210	8.51878	4.6607e-05	5.91949	2.45132e-05	1.76684	15.0513	10.4588	1119	236					KOG0927	Predicted transporter (ABC superfamily)	General function prediction only	POORLY CHARACTERIZED
360412	8.3366	0.00092339	48.128	2.37779e-05	1.47876	12.3278	71.1698	1711	500
164996	8.32252	0.0172729	0.876118	0.83742	107.312	893.106	94.0179	1878	626			zinc ion binding	GO:0008270					IPR001138	Fungal transcriptional regulatory protein, N-terminal
167308	8.31367	0.00139405	0.224188	0.108034	493.05	4099.05	110.536	189	63
365179	8.30881	0.0161186	0	0.0657319	1.50608	12.5137	0	1751	550					KOG4475	FOG: Immunoglobin and related proteins	General function prediction only	POORLY CHARACTERIZED
343216	8.27976	0.0249851	3.78533	0.00851875	201.14	1665.39	761.381	963	321
302054	8.26692	0.0487422	0.070743	0.270753	0.814623	6.73443	0.0576289	765	128
357980	8.24419	0.0498864	0.112389	1.78996e-08	591.677	4877.9	66.4979	1133	188			NAD binding	GO:0051287	KOG2682	NAD-dependent histone deacetylases and class I sirtuins (SIR2 family)	Chromatin structure and dynamics	INFORMATION STORAGE AND PROCESSING	IPR003000	NAD-dependent histone deacetylase, silent information regulator Sir2
314749	8.12939	1.26276e-08	1.91835	0.261387	8.45484	68.7327	16.2194	683	92
318618	8.01141	2.84679e-11	0.509038	0.0408066	87.2306	698.841	44.4037	787	100
349636	7.88113	5.20164e-06	3.33889	0.000171462	71.27	561.688	237.962	1845	615					KOG4497	Uncharacterized conserved protein WDR8, contains WD repeats	General function prediction only	POORLY CHARACTERIZED	IPR011044	Quinoprotein amine dehydrogenase, beta chain-like
231180	7.83188	0.00982836	1.00773	0.54687	14.8793	116.533	14.9944	1089	363			protein amino acid phosphorylation	GO:0006468					IPR011009	Protein kinase-like
344649	7.67099	0.0115774	0	0.318307	0.52695	4.04223	0	4518	1506					KOG2739	Leucine-rich acidic nuclear protein	General function prediction only	POORLY CHARACTERIZED
297684	7.65981	3.33884e-08	20.7861	3.59765e-05	2.33167	17.8602	48.4663	2449	673
298519	7.59676	0.00712475	0	0.0604829	1.56565	11.8939	0	1812	495	3.6.1.-	In phosphorous-containing anhydrides.	ATP-dependent 5'-3' DNA helicase activity	GO:0043141	KOG0332	ATP-dependent RNA helicase	RNA processing and modification	INFORMATION STORAGE AND PROCESSING	IPR000629	RNA helicase, ATP-dependent, DEAD-box, conserved site
341990	7.51798	0.0338662	7.41138	0.0332992	1.51457	11.3865	11.225	609	203
347247	7.51092	0.0156925	0	0.330699	0.502292	3.77267	0	2697	899
159753	7.46186	0.0154376	12.1907	0.0112174	2.1536	16.0698	26.2538	987	329
321162	7.31431	0.0230856	1.54473	0.197273	11.5425	84.4254	17.83	491	75
341514	7.3123	3.26624e-05	15.3432	0.022548	1.37345	10.0431	21.0731	930	310			regulation of transcription	GO:0045449	KOG1318	Helix loop helix transcription factor EB	Transcription	INFORMATION STORAGE AND PROCESSING	IPR011598	Helix-loop-helix DNA-binding
350496	7.29909	0.00446626	2.53036	0.000397531	12.9627	94.6158	32.8003	1779	593			membrane	GO:0016020	KOG1292	Xanthine/uracil transporters	Nucleotide transport and metabolism	METABOLISM	IPR006042	Xanthine/uracil permease
358249	7.24014	0.0211956	0.779396	0.827215	15.9235	115.288	12.4107	1643	473					KOG4508	Uncharacterized conserved protein	Function unknown	POORLY CHARACTERIZED
361986	7.17194	0.000604736	0.250783	0.000283218	14.2459	102.171	3.57264	1649	411
345846	7.14706	0.0116443	0.317588	0.470317	1.19875	8.56755	0.380709	579	193
338940	7.10416	0.0340625	1.36357	0.0159168	77.589	551.205	105.798	841	87
184193	7.01631	0.00146643	1.19169	0.439105	29.3578	205.984	34.9853	4434	1478									IPR001229	Mannose-binding lectin
178860	6.6175	0.00972707	0.870224	0.983731	64.2742	425.334	55.933	3681	1227	3.2.1.3	Glucan 1,4-alpha-glucosidase.	glucan 1,4-alpha-glucosidase activity	GO:0004339	KOG4701	Chitinase	Cell wall/membrane/envelope biogenesis	CELLULAR PROCESSES AND SIGNALING
351943	6.6067	0.00153152	1.65189	2.96801e-05	24.6762	163.028	40.7622	1479	493			transport	GO:0006810	KOG1289	Amino acid transporters	Amino acid transport and metabolism	METABOLISM	IPR002293	Amino acid/polyamine transporter I
340317	6.53963	0.00390801	0.255373	0.0527831	4.6557	30.4465	1.18894	783	261
356362	6.45324	0.0271185	0.392548	4.08796e-08	68.6338	442.911	26.9421	1751	371			metabolic process	GO:0008152	KOG1268	Glucosamine 6-phosphate synthetases, contain amidotransferase and phosphosugar isomerase domains	Cell wall/membrane/envelope biogenesis	CELLULAR PROCESSES AND SIGNALING	IPR000583	Glutamine amidotransferase, class-II
308015	6.45139	0.044839	1.27083	0.293212	6.29361	40.6025	7.99811	1525	342
318198	6.44599	1.58978e-08	0.913217	0.205495	397.986	2565.41	363.447	782	201	2.7.1.25	Adenylylsulfate kinase.	adenylylsulfate kinase activity	GO:0004020	KOG0635	Adenosine 5'-phosphosulfate kinase	Inorganic ion transport and metabolism	METABOLISM	IPR002891	Adenylylsulphate kinase, C-terminal
361931	6.32137	0.0085996	0	0.21115	0.7737	4.89085	0	775	246
174162	6.18013	0.00127792	4.39534	0.00200827	114.888	710.025	504.974	3204	1068	1.4.1.2	Glutamate dehydrogenase.	glutamate dehydrogenase activity	GO:0004352	KOG2250	Glutamate/leucine/phenylalanine/valine dehydrogenases	Amino acid transport and metabolism	METABOLISM	IPR016040	NAD(P)-binding
279355	6.1628	0.043624	1.59474	0.010766	17.5596	108.216	28.003	1347	423	2.1.1.-	Methyltransferases.	monomethylamine methyltransferase activity	GO:0043852	KOG0838	RNA Methylase, SpoU family	RNA processing and modification	INFORMATION STORAGE AND PROCESSING	IPR013123	RNA 2-O ribose methyltransferase, substrate binding
355386	6.11766	0.0338374	0.129078	0.00160138	6.60765	40.4234	0.852902	620	180			metabolic process	GO:0008152					IPR016040	NAD(P)-binding
361999	6.11604	0.0256118	1.96498	0.61536	0.661008	4.04275	1.29887	1253	307
352138	6.07503	0.00339549	2.98153	1.2143e-08	16.2261	98.5742	48.3786	1938	646			regulation of transcription	GO:0045449	KOG1318	Helix loop helix transcription factor EB	Transcription	INFORMATION STORAGE AND PROCESSING	IPR011598	Helix-loop-helix DNA-binding
305823	6.06126	0.0324881	0.545081	0.624612	38.3274	232.312	20.8915	1381	334	1.1.1.250	D-arabinitol 2-dehydrogenase.	D-arabinitol 2-dehydrogenase activity	GO:0047038	KOG0725	Reductases with broad range of substrate specificities	General function prediction only	POORLY CHARACTERIZED	IPR016040	NAD(P)-binding
285401	6.00242	0.0366288	0.461748	0.0903623	175.032	1050.62	80.8206	775	225					KOG1667	Zn2+-binding protein Melusin/RAR1, contains CHORD domain	General function prediction only	POORLY CHARACTERIZED	IPR007051	CHORD
41607	5.9976	0.0407676	4.34892	0.0933681	0.527711	3.165	2.29498	780	260					KOG1270	Methyltransferases	Coenzyme transport and metabolism	METABOLISM	IPR013217	Methyltransferase type 12
356645	5.97945	0.0108274	2.22475	5.90013e-14	31.3145	187.243	69.667	1236	412									IPR013927	Transcription factor Opi1
56399	5.92103	0.0124785	2.70281	0.257888	3.39486	20.1011	9.17565	339	113
278181	5.87343	8.03185e-08	0.867192	0.936578	38.8789	228.353	33.7155	1928	514	6.3.2.3	Glutathione synthase.	catalytic activity	GO:0003824	KOG0021	Glutathione synthetase	Secondary metabolites biosynthesis, transport and catabolism	METABOLISM	IPR016185	PreATP-grasp-like fold
346532	5.85642	0.0268758	0.465132	0.00526407	455.768	2669.16	211.992	2256	752			ATP binding	GO:0005524	KOG0103	Molecular chaperones HSP105/HSP110/SSE1, HSP70 superfamily	Posttranslational modification, protein turnover, chaperones	CELLULAR PROCESSES AND SIGNALING	IPR013126	Heat shock protein 70
342280	5.84348	0	0.96235	0.721783	63.3986	370.468	61.0117	348	116
303836	5.80664	0	0	1.27881e-12	18.3845	106.752	0	385	110
359662	5.79313	0.00494871	0.378851	2.20583e-08	101.853	590.047	38.5871	1897	478	2.3.1.31	Homoserine O-acetyltransferase.	O-acetyltransferase activity	GO:0016413					IPR006296	Homoserine O-acetyltransferase
284562	5.7796	9.05039e-06	37.5855	5.47299e-09	3.3585	19.4108	126.231	756	252			hydrolase activity	GO:0016787	KOG3043	Predicted hydrolase related to dienelactone hydrolase	General function prediction only	POORLY CHARACTERIZED	IPR002925	Dienelactone hydrolase
272503	5.7056	0.00267386	8.64483	2.57931e-07	3.39219	19.3544	29.3249	2511	688			metabolic process	GO:0008152	KOG0137	Very-long-chain acyl-CoA dehydrogenase	Lipid transport and metabolism	METABOLISM	IPR009100	Acyl-CoA dehydrogenase/oxidase, middle and N-terminal
366970	5.67152	0.0421555	0	0.165877	0.919717	5.2162	0	1422	372
314593	5.59326	0.013383	1.29526	0.10896	70.9455	396.817	91.8926	2052	574	1.1.1.95	Phosphoglycerate dehydrogenase.	phosphoglycerate dehydrogenase activity	GO:0004617	KOG0068	D-3-phosphoglycerate dehydrogenase, D-isomer-specific 2-hydroxy acid dehydrogenase superfamily	Amino acid transport and metabolism	METABOLISM	IPR016040	NAD(P)-binding
183228	5.59267	0.0102556	1.35294	0.1856	25.3712	141.893	34.3257	1308	436			metal ion transmembrane transporter activity	GO:0046873	KOG2662	Magnesium transporters: CorA family	Inorganic ion transport and metabolism	METABOLISM	IPR002523	Mg2+ transporter protein, CorA-like
292354	5.53697	1.11151e-05	0.0290909	7.34265e-05	91.1002	504.418	2.65018	1513	314			membrane	GO:0016020					IPR001425	Rhodopsin, bacterial
310431	5.32485	5.92959e-06	1.03099	0.304707	67.7155	360.575	69.8137	1919	371					KOG1470	Phosphatidylinositol transfer protein PDR16 and related proteins	Lipid transport and metabolism	METABOLISM	IPR001251	Cellular retinaldehyde-binding/triple function, C-terminal
158484	5.30962	0.0499379	1.13911	0.0111881	56.1657	298.218	63.9788	2049	683			nucleic acid binding	GO:0003676	KOG0127	Nucleolar protein fibrillarin NOP77 (RRM superfamily)	RNA processing and modification	INFORMATION STORAGE AND PROCESSING	IPR000504	RNA recognition motif, RNP-1
290120	5.29835	0.0370858	0.678317	0.871438	1.6851	8.92827	1.14303	1777	504					KOG0255	Synaptic vesicle transporter SVOP and related transporters (major facilitator superfamily)	General function prediction only	POORLY CHARACTERIZED	IPR016196	MFS general substrate transporter
49895	5.28313	6.9565e-07	2.83558	0.0354366	21.6255	114.25	61.3209	1275	425					KOG1396	Uncharacterized conserved protein	Function unknown	POORLY CHARACTERIZED	IPR008979	Galactose-binding like
362941	5.22417	0.0319238	0.571723	0.800231	1.23793	6.46713	0.70775	2126	665					KOG1213	Sister chromatid cohesion complex Cohesin, subunit RAD21/SCC1	Cell cycle control, cell division, chromosome partitioning	METABOLISM	IPR006910	Rad21/Rec8 like protein, N-terminal
348642	5.18231	0.0196137	1.23492	0.365547	13.1341	68.0648	16.2195	771	257	1.5.1.3	Dihydrofolate reductase.	nucleotide biosynthetic process	GO:0009165	KOG1324	Dihydrofolate reductase	Coenzyme transport and metabolism	METABOLISM	IPR001796	Dihydrofolate reductase region
365307	5.15938	0.00398428	2.52772	1.06928e-06	10.3217	53.2538	26.0904	2026	568									IPR011009	Protein kinase-like
342419	5.14074	1.24729e-12	6.94467	0.00202544	6.6226	34.0451	45.9918	1470	490	3.4.14.-	Dipeptidyl-peptidases and tripeptidyl-peptidases.	tripeptidyl-peptidase activity	GO:0008240	KOG2100	Dipeptidyl aminopeptidase	Posttranslational modification, protein turnover, chaperones	CELLULAR PROCESSES AND SIGNALING	IPR002469	Peptidase S9B, dipeptidylpeptidase IV N-terminal
360368	5.07955	0.00011049	0.35254	0.00332613	15.6001	79.2413	5.49964	1272	358

## Sheet: Table 10
Supplementary Table 10. Downregulated genes (>5-fold) in Tuber magnatum fruiting body (FB) compared to free-living mycelium (FLM). Downregulated genes in ectomycorrhiza (ECM) are also showed.
Protein ID	Fold change FB vs FLM	FDR p-value	Fold change ECM vs FLM	FDR p-value correction	FLM mean rpkm	FB mean rpkm	ECM mean rpkm	transcript Size	protein Size	ecNum	KEGG annotation	GO annotation	GO_Acc	kogid	kogdefline	kogClass	kogGroup	Interpro ID	Interpro annotation	Cazy description	Cazy defline	predicted secreted Protein	SSP (>300aa)
280338	0.000565624	2.76183e-07	0.188767	0.000156692	1972.09	1.11546	372.264	559	184													x	x
344214	0.00121032	1.6241e-14	0.0779799	5.16285e-12	339.939	0.411434	26.5084	771	257
188420	0.00124989	5.13049e-30	0.00443985	6.76931e-30	1160.12	1.45002	5.15074	531	177			chitin binding	GO:0008061					IPR001002	Chitin-binding, type 1			x	x
275149	0.00140603	6.77273e-14	0.0554928	7.01464e-12	1254.78	1.76425	69.6311	1757	544					KOG1216	von Willebrand factor and related coagulation proteins	Extracellular structures	CELLULAR PROCESSES AND SIGNALING	IPR001938	Thaumatin, pathogenesis-related
229136	0.0019389	8.20819e-20	0.000526322	7.26152e-20	2696.06	5.22738	1.41899	390	130													x	x
183381	0.00232847	2.17838e-08	0.0324018	9.21047e-08	540.718	1.25904	17.5203	1353	451			catalytic activity	GO:0003824	KOG4742	Predicted chitinase	General function prediction only	POORLY CHARACTERIZED	IPR011330	Glycoside hydrolase/deacetylase, beta/alpha-barrel	CBM18+AC0-CBM18+AC0-CBM18+AC0-CE4	Carbohydrate+AC0-Binding Module Family 18 / Carbohydrate Esterase Family 4 protein
355624	0.00343296	3.95319e-11	0.295354	0.000219529	783.268	2.68893	231.341	1910	586			catalytic activity	GO:0003824	KOG1231	Proteins containing the FAD binding domain	Energy production and conversion	METABOLISM	IPR016166	FAD-binding, type 2			x
348600	0.00353032	1.04319e-07	0	1.06338e-07	155.133	0.547669	0	846	282			nucleic acid binding	GO:0003676					IPR012337	Polynucleotidyl transferase, Ribonuclease H fold
289278	0.00382068	1.10984e-06	0.064183	8.56845e-06	1701.13	6.49946	109.183	588	157									IPR008972	Cupredoxin			x	x
300606	0.00382709	6.36504e-05	0.123198	0.000841638	739.648	2.83069	91.1234	1096	364					KOG1269	SAM-dependent methyltransferases	General function prediction only	POORLY CHARACTERIZED	IPR013217	Methyltransferase type 12
313172	0.00431665	1.49078e-42	0.117059	2.57015e-28	2992.11	12.9159	350.254	1190	246									IPR009050	Globin-like
20824	0.00454108	1.9894e-15	0.0326235	2.42055e-14	3209.72	14.5756	104.712	279	93
38636	0.00486756	2.99959e-21	0.0817618	5.80253e-17	176.701	0.860103	14.4474	210	70
346050	0.00502978	1.27e-16	0.052878	9.26794e-15	1951.06	9.81338	103.168	399	133					KOG3753	Circadian clock protein period	Signal transduction mechanisms	CELLULAR PROCESSES AND SIGNALING					x	x
292899	0.00543226	8.34994e-37	0.0647052	9.13136e-25	161.913	0.879555	10.4766	365	98			sequence-specific DNA binding	GO:0043565	KOG0773	Transcription factor MEIS1 and related HOX domain proteins	Transcription	INFORMATION STORAGE AND PROCESSING	IPR009057	Homeodomain-like
279134	0.00549126	0.00188903	0.177033	0.0163776	423.828	2.32735	75.0315	672	224
352033	0.00601833	1.73382e-09	0.0600186	5.35306e-08	73.3564	0.441483	4.40274	1833	611									IPR002110	Ankyrin
345965	0.00662764	9.55837e-50	0.0129607	3.65794e-49	1081.26	7.16619	14.0139	819	273
193382	0.00675262	1.48562e-34	0.0185743	1.16395e-33	945.85	6.38697	17.5685	864	288					KOG0658	Glycogen synthase kinase-3	Carbohydrate transport and metabolism	METABOLISM
347251	0.0072006	0.0107206	0.0535484	0.0167274	88.7506	0.639058	4.75245	1023	341													x
204715	0.00755877	0.0053901	0.0829198	0.0135256	58.8468	0.44481	4.87957	1680	560			transport	GO:0006810	KOG0254	Predicted transporter (major facilitator superfamily)	General function prediction only	POORLY CHARACTERIZED	IPR016196	MFS general substrate transporter
351250	0.00821281	4.67155e-12	0.0122651	7.79021e-12	199.328	1.63704	2.44477	1068	356	4.2.1.1	Carbonate dehydratase.	zinc ion binding	GO:0008270	KOG0382	Carbonic anhydrase	General function prediction only	POORLY CHARACTERIZED	IPR001148	Carbonic anhydrase, eukaryotic			x
363351	0.00905142	1.18229e-31	0.227299	2.08923e-12	555.423	5.02737	126.247	984	328					KOG4296	Epithelin/granulin	Signal transduction mechanisms	CELLULAR PROCESSES AND SIGNALING					x
299570	0.00963583	2.06298e-30	0.00583637	9.54588e-31	3630.75	34.9853	21.1904	1427	350	1.1.1.1	Alcohol dehydrogenase.	alcohol dehydrogenase activity, iron-dependent	GO:0004025	KOG0023	Alcohol dehydrogenase, class V	Secondary metabolites biosynthesis, transport and catabolism	METABOLISM	IPR016040	NAD(P)-binding
358022	0.0101156	2.1768e-104	0.834921	1	362.566	3.66756	302.714	2153	581			integral to membrane	GO:0016021	KOG0254	Predicted transporter (major facilitator superfamily)	General function prediction only	POORLY CHARACTERIZED	IPR016196	MFS general substrate transporter
349400	0.0104853	7.57908e-55	0.168184	2.59444e-26	2275.33	23.8576	382.676	336	112			nucleic acid binding	GO:0003676	KOG0118	FOG: RRM domain	General function prediction only	POORLY CHARACTERIZED	IPR000504	RNA recognition motif, RNP-1
366378	0.0107866	3.3607e-12	0.0461921	8.94261e-10	25.3817	0.273783	1.17244	418	119									IPR010916	TonB box, conserved site
340654	0.0109466	2.97179e-90	0.0478716	2.05872e-69	178.416	1.95305	8.54108	924	308					KOG1283	Serine carboxypeptidases	Posttranslational modification, protein turnover, chaperones	CELLULAR PROCESSES AND SIGNALING
273229	0.0110241	3.20133e-06	0.0313098	6.91346e-06	97.0663	1.07007	3.03913	1236	412									IPR008985	Concanavalin A-like lectin/glucanase
340393	0.0116692	1.45544e-53	0.00930763	9.18185e-54	301.753	3.52121	2.80861	519	173
363917	0.0123869	8.77273e-40	0.617665	0.21135	63.0457	0.780941	38.9411	1311	437
354644	0.0134407	6.00425e-19	0.172315	2.25412e-10	437.883	5.88545	75.454	1704	568	3.2.1.58	Glucan 1,3-beta-glucosidase.	glucan 1,3-beta-glucosidase activity	GO:0004338	KOG1216	von Willebrand factor and related coagulation proteins	Extracellular structures	CELLULAR PROCESSES AND SIGNALING	IPR017853	Glycoside hydrolase, catalytic core	GH17	Glycoside Hydrolase Family 17 protein
205472	0.0134523	8.18716e-18	1.37928	0.00125505	59.9613	0.806618	82.7033	915	305					KOG1601	GATA-4/5/6 transcription factors	Transcription	INFORMATION STORAGE AND PROCESSING
170056	0.0140534	1.55009e-07	0.0153627	1.97699e-07	445.094	6.25509	6.83786	2694	898
184948	0.0148337	9.89505e-87	0.133866	7.26521e-62	758.96	11.2582	101.599	702	234
363287	0.0150608	1.90959e-21	0.0325138	3.18945e-20	83.3041	1.25463	2.70853	923	228	3.1.6.-	Sulfuric ester hydrolases.	alkyl sulfatase activity	GO:0018741					IPR015797	NUDIX
207712	0.0152206	1.11649e-08	0.156978	0.00083252	12.6742	0.192909	1.98958	1878	626			carbohydrate metabolic process	GO:0005975					IPR017853	Glycoside hydrolase, catalytic core	GH36	Glycoside Hydrolase Family 36 protein
35503	0.0153881	5.9137e-06	0.531556	0.375253	97.8608	1.50589	52.0185	804	268									IPR005103	Glycoside hydrolase, family 61	AA9	Lytic polysaccharide monooxygenase (formerly GH61)
358051	0.0160885	4.51633e-16	0.270353	1.50261e-06	66.3393	1.0673	17.935	1011	337	1.1.1.1	Alcohol dehydrogenase.	alcohol dehydrogenase activity, iron-dependent	GO:0004025	KOG0024	Sorbitol dehydrogenase	Secondary metabolites biosynthesis, transport and catabolism	METABOLISM	IPR016040	NAD(P)-binding
169338	0.0163905	1.52707e-09	0.0519329	1.18814e-08	2331.2	38.2096	121.066	1701	567			protein dimerization activity	GO:0046983					IPR014756	Immunoglobulin E-set
279872	0.0167953	2.47011e-35	1.12311	0.00611551	89.1805	1.49781	100.16	1056	352
278845	0.0171733	1.59725e-57	0.188177	6.83229e-31	1658.68	28.4851	312.125	1190	345					KOG1269	SAM-dependent methyltransferases	General function prediction only	POORLY CHARACTERIZED	IPR013217	Methyltransferase type 12
45623	0.0176626	5.74783e-24	0.00462062	7.30795e-25	38.934	0.687675	0.179899	408	136
324972	0.017779	3.65052e-64	0.239636	1.90338e-26	103.998	1.84898	24.9216	1375	376
327603	0.0179898	6.29333e-11	0.00432456	3.96909e-11	510.551	9.18471	2.20791	829	119													x	x
289739	0.0189755	1.70929e-06	0.0321855	3.09002e-06	739.444	14.0313	23.7994	1454	454			catalytic activity	GO:0003824	KOG1231	Proteins containing the FAD binding domain	Energy production and conversion	METABOLISM	IPR016166	FAD-binding, type 2
276714	0.0190091	2.06862e-09	0.470086	0.0162168	150.936	2.86916	70.9527	1755	585	5.2.1.8	Peptidylprolyl isomerase.	cyclophilin-type peptidyl-prolyl cis-trans isomerase activity	GO:0042027	KOG2992	Nucleolar GTPase/ATPase p130	Nuclear structure	CELLULAR PROCESSES AND SIGNALING
345076	0.0190213	4.14324e-06	0.0229142	6.50235e-06	25.1498	0.478382	0.576289	459	153
292445	0.0192551	0.000264971	0.141475	0.00254012	239.467	4.61097	33.8785	2083	594			integral to membrane	GO:0016021	KOG0254	Predicted transporter (major facilitator superfamily)	General function prediction only	POORLY CHARACTERIZED	IPR016196	MFS general substrate transporter
343861	0.019356	7.58016e-05	1.35053	0.39175	171.653	3.32253	231.823	414	138													x	x
286009	0.0197856	1.41094e-06	0.359893	0.0320109	37.892	0.749717	13.6371	2412	804
310618	0.0198514	2.97569e-08	0.00889021	2.50474e-08	492.376	9.77435	4.37733	549	71
353632	0.0199572	8.88362e-28	1.15948	0.0586065	104.504	2.08561	121.171	909	303	1.1.1.-	With NAD(+) or NADP(+) as acceptor.	(R)-2-hydroxyglutarate dehydrogenase activity	GO:0051990	KOG0409	Predicted dehydrogenase	General function prediction only	POORLY CHARACTERIZED	IPR016040	NAD(P)-binding
341224	0.0200345	1.49115e-15	0.0325338	1.09916e-13	30.1131	0.603299	0.979691	540	180
312854	0.0201248	2.88965e-80	1.99837	0.0397927	1098.88	22.1147	2195.96	1201	317			binding	GO:0005488					IPR016040	NAD(P)-binding
357814	0.0209579	6.33326e-08	0.0412388	1.93347e-07	75.9825	1.59243	3.13343	7070	2265	2.4.1.183	Alpha-1,3-glucan synthase.	alpha-1,3-glucan synthase activity	GO:0047657	KOG0471	Alpha-amylase	Carbohydrate transport and metabolism	METABOLISM	IPR017853	Glycoside hydrolase, catalytic core	GH13+AF8-22+AC0-GT5	Glycoside Hydrolase Family 13 / Glycosyltransferase Family 5 protein
361113	0.021822	1.81487e-06	0.106078	2.56085e-05	616.296	13.4488	65.3756	934	303			protein amino acid phosphorylation	GO:0006468	KOG1437	Fasciclin and related adhesion glycoproteins	Extracellular structures	CELLULAR PROCESSES AND SIGNALING	IPR000782	Beta-Ig-H3/fasciclin
347321	0.0226424	4.969e-132	0.0368414	2.6867e-126	1412.07	31.9727	52.0227	1611	537					KOG1399	Flavin-containing monooxygenase	Secondary metabolites biosynthesis, transport and catabolism	METABOLISM	IPR013027	FAD-dependent pyridine nucleotide-disulphide oxidoreductase
292413	0.0229281	4.46451e-07	0.0196642	5.0542e-07	1076.23	24.6759	21.1633	629	133
285213	0.0229506	7.91567e-29	0.00533046	2.469e-30	46.7676	1.07335	0.249293	2061	687			nucleoside-triphosphatase activity	GO:0017111	KOG0055	Multidrug/pheromone exporter, ABC superfamily	Secondary metabolites biosynthesis, transport and catabolism	METABOLISM	IPR011527	ABC transporter, transmembrane region, type 1
364071	0.0234068	2.88893e-06	0.203029	0.000520359	5321.19	124.552	1080.36	1093	170					KOG4297	C-type lectin	Signal transduction mechanisms	CELLULAR PROCESSES AND SIGNALING	IPR014005	Extracellular membrane protein, 8-cysteine region, fungi			x	x
323105	0.0235823	2.06683e-14	0.430392	0.00202106	285.641	6.73607	122.938	1765	337					KOG1269	SAM-dependent methyltransferases	General function prediction only	POORLY CHARACTERIZED	IPR013217	Methyltransferase type 12
343331	0.0235913	1.67236e-34	0.547579	0.000855916	249.005	5.87435	136.35	2016	672			zinc ion binding	GO:0008270	KOG1721	FOG: Zn-finger	General function prediction only	POORLY CHARACTERIZED	IPR007087	Zinc finger, C2H2-type
340059	0.024671	1.18881e-31	0.0776581	4.57771e-25	51.7779	1.27741	4.02098	870	290
306531	0.0247169	0.00501492	0	0.00348789	3.67095	0.0907345	0	364	54
365260	0.0256453	4.79054e-27	0.310437	1.31451e-05	159.779	4.09757	49.6013	678	181
337070	0.0256694	1.92093e-06	0.212343	0.000360356	1213.05	31.1382	257.583	1405	298			metabolic process	GO:0008152	KOG0747	Putative NAD+-dependent epimerases	Carbohydrate transport and metabolism	METABOLISM	IPR016040	NAD(P)-binding
225272	0.0257903	5.09293e-22	17.9752	1.19981e-06	35.8106	0.923565	643.704	1077	359			integral to membrane	GO:0016021	KOG1558	Fe2+/Zn2+ regulated transporter	Inorganic ion transport and metabolism	METABOLISM	IPR004698	Zinc/iron permease, fungal and plant
365749	0.0258837	1.23275e-10	1.08997	0.342312	534.831	13.8434	582.949	1189	286					KOG4433	Tweety transmembrane/cell surface protein	General function prediction only	POORLY CHARACTERIZED
352101	0.0260341	1.29816e-18	0.257599	6.79515e-08	462.335	12.0365	119.097	1572	524			integral to membrane	GO:0016021	KOG0254	Predicted transporter (major facilitator superfamily)	General function prediction only	POORLY CHARACTERIZED	IPR016196	MFS general substrate transporter
200863	0.0260545	6.33269e-10	0.0300174	1.42425e-09	21.196	0.552252	0.636249	5697	1899	3.2.1.18	Exo-alpha-sialidase.	exo-alpha-sialidase activity	GO:0004308	KOG4157	beta-1,6-N-acetylglucosaminyltransferase, contains WSC domain	Carbohydrate transport and metabolism	METABOLISM	IPR011047	Quinonprotein alcohol dehydrogenase-like
359320	0.0260547	9.3841e-36	0.39451	1.09418e-05	185.954	4.84499	73.3608	981	327	1.13.11.37	Hydroxyquinol 1,2-dioxygenase.	hydroxyquinol 1,2-dioxygenase activity	GO:0018581					IPR015889	Intradiol ring-cleavage dioxygenase, core
349983	0.0263503	0	0.145125	4.7726e-155	4689.54	123.571	680.569	678	226			nucleosome assembly	GO:0006334	KOG4012	Histone H1	Chromatin structure and dynamics	INFORMATION STORAGE AND PROCESSING	IPR005818	Histone H1/H5
347607	0.0264797	3.93433e-45	0.258604	1.00047e-17	74.8982	1.98328	19.369	2277	759					KOG1995	Conserved Zn-finger protein	General function prediction only	POORLY CHARACTERIZED
358021	0.0265693	1.31765e-19	0.545716	0.1466	54.6745	1.45266	29.8367	1125	242
358292	0.0269732	6.50679e-45	0.210466	2.57918e-18	2276.61	61.4076	479.15	1275	206					KOG4157	beta-1,6-N-acetylglucosaminyltransferase, contains WSC domain	Carbohydrate transport and metabolism	METABOLISM					x	x
355889	0.0274365	0.00217174	1.01125	0.632576	59.7007	1.63798	60.3721	972	222
277903	0.0275459	5.9864e-50	3.18906	0.0559197	83.1003	2.28907	265.012	1233	411			zinc ion binding	GO:0008270	KOG1721	FOG: Zn-finger	General function prediction only	POORLY CHARACTERIZED	IPR007087	Zinc finger, C2H2-type
203834	0.0279309	9.00063e-12	2.9186	6.5048e-15	18.4974	0.516648	53.9864	1113	371
280443	0.0280046	0.000131344	0.427007	0.0841485	144.518	4.04717	61.7101	2296	738					KOG1216	von Willebrand factor and related coagulation proteins	Extracellular structures	CELLULAR PROCESSES AND SIGNALING					x
347014	0.0282457	2.39321e-94	0.387317	2.05948e-09	169.37	4.78397	65.5999	1212	404
292915	0.0283602	2.4235e-301	0.0303981	2.0217e-293	507.754	14.4	15.4348	425	121			integral to membrane	GO:0016021	KOG3348	BolA (bacterial stress-induced morphogen)-related protein	Signal transduction mechanisms	CELLULAR PROCESSES AND SIGNALING	IPR002634	BolA-like protein
359369	0.028418	9.65908e-12	0	1.2584e-12	18.4746	0.525012	0	1443	481			nutrient reservoir activity	GO:0045735					IPR011051	Cupin, RmlC-type
171306	0.0290376	1.10179e-06	1.64802	0.273389	317.444	9.21781	523.154	567	189
361299	0.0294146	5.78996e-18	0.0244437	6.80037e-18	359.965	10.5882	8.79887	1049	201
287422	0.029875	8.0744e-122	0.0604441	4.2984e-107	205.409	6.1366	12.4158	880	276	3.5.-.-	Acting on carbon-nitrogen bonds, other than peptide bonds.	hydrolase activity, acting on carbon-nitrogen (but not peptide) bonds	GO:0016810	KOG0807	Carbon-nitrogen hydrolase	Amino acid transport and metabolism	METABOLISM	IPR003010	Nitrilase/cyanide hydratase and apolipoprotein N-acyltransferase
363844	0.0301739	0.000370262	0.219998	0.0138771	60.6496	1.83003	13.3428	684	143													x	x
274314	0.030195	4.98577e-14	0.093165	5.0697e-11	27.9286	0.843307	2.60197	1097	325									IPR013217	Methyltransferase type 12
283414	0.0306783	0.000755735	0.0219262	0.000726197	97.2804	2.98439	2.13299	1578	467	3.4.11.-	Aminopeptidases.	alanine aminopeptidase activity	GO:0016284	KOG2195	Transferrin receptor and related proteins containing the protease-associated (PA) domain	General function prediction only	POORLY CHARACTERIZED	IPR007484	Peptidase M28			x
365693	0.0308098	3.00205e-19	0.489525	0.00124782	72.3303	2.22848	35.4075	1908	617									IPR011043	Galactose oxidase/kelch, beta-propeller
295094	0.0316294	3.44722e-40	0.130475	3.76994e-20	270.246	8.54772	35.2603	864	247									IPR011009	Protein kinase-like
233400	0.0319332	2.01663e-21	0.395108	0.0041286	35.208	1.1243	13.911	636	212			nucleic acid binding	GO:0003676					IPR016027	Nucleic acid-binding, OB-fold-like
273716	0.0321686	5.03429e-20	0.852145	0.969325	33.0001	1.06157	28.1209	1492	409			zinc ion binding	GO:0008270	KOG1812	Predicted E3 ubiquitin ligase	Posttranslational modification, protein turnover, chaperones	CELLULAR PROCESSES AND SIGNALING	IPR001841	Zinc finger, RING-type
281106	0.0322911	1.05107e-33	0.362223	1.1286e-08	56.4521	1.8229	20.4483	1385	430									IPR003006	Immunoglobulin/major histocompatibility complex, conserved site
157383	0.0323841	1.01455e-09	1.50776	0.369562	15.0499	0.487377	22.6915	465	155			integral to membrane	GO:0016021	KOG0255	Synaptic vesicle transporter SVOP and related transporters (major facilitator superfamily)	General function prediction only	POORLY CHARACTERIZED	IPR016196	MFS general substrate transporter
290558	0.0324964	2.06617e-37	0.568433	0.0164778	63.0083	2.04755	35.816	1378	376	3.2.1.14	Chitinase.	endochitinase activity	GO:0008843	KOG2806	Chitinase	Carbohydrate transport and metabolism	METABOLISM	IPR017853	Glycoside hydrolase, catalytic core	GH18	Glycoside Hydrolase Family 18 protein
273789	0.0325236	7.51677e-54	0.0296134	1.21304e-53	127.027	4.13136	3.76168	1521	496			integral to membrane	GO:0016021	KOG0255	Synaptic vesicle transporter SVOP and related transporters (major facilitator superfamily)	General function prediction only	POORLY CHARACTERIZED	IPR016196	MFS general substrate transporter
164073	0.0326084	1.64759e-95	0.451898	8.16127e-12	175.217	5.71354	79.1802	1566	522					KOG2432	Uncharacterized conserved protein	Function unknown	POORLY CHARACTERIZED	IPR012860	Protein of unknown function DUF1630
166877	0.0331007	8.46864e-06	0.124237	0.000203999	231.854	7.67453	28.8048	951	317
339004	0.0337538	5.90127e-09	0.124085	4.28831e-07	239.986	8.10043	29.7786	1233	264	5.4.2.8	Phosphomannomutase.	metabolic process	GO:0008152	KOG3189	Phosphomannomutase	Lipid transport and metabolism	METABOLISM	IPR006379	HAD-superfamily hydrolase, subfamily IIB
280673	0.0338818	4.01201e-11	0.118541	7.58796e-09	206.603	7.00009	24.491	2211	651					KOG3771	Amphiphysin	Intracellular trafficking, secretion, and vesicular transport	CELLULAR PROCESSES AND SIGNALING	IPR014756	Immunoglobulin E-set
272517	0.0338921	2.66732e-06	2.31582	0.0466816	217.865	7.3839	504.536	1868	523	2.7.7.9	UTP--glucose-1-phosphate uridylyltransferase.	UTP:glucose-1-phosphate uridylyltransferase activity	GO:0003983	KOG2638	UDP-glucose pyrophosphorylase	Carbohydrate transport and metabolism	METABOLISM	IPR016267	UTP--glucose-1-phosphate uridylyltransferase, subgroup
189165	0.0339394	1.61546e-05	0.00713557	9.7825e-06	175.742	5.96457	1.25402	855	285					KOG1216	von Willebrand factor and related coagulation proteins	Extracellular structures	CELLULAR PROCESSES AND SIGNALING
235435	0.0341714	4.7337e-11	2.26832	0.053181	82.968	2.83513	188.198	786	262
223562	0.0349524	8.05937e-16	1.5792	0.0162248	82.5251	2.88445	130.324	504	168	4.1.1.21	Phosphoribosylaminoimidazole carboxylase.	phosphoribosylaminoimidazole carboxylase complex	GO:0009320	KOG2835	Phosphoribosylamidoimidazole-succinocarboxamide synthase	Nucleotide transport and metabolism	METABOLISM	IPR000031	1-(5-Phosphoribosyl)-5-amino-4-imidazole-carboxylate (AIR) carboxylase
289383	0.0350053	1.98473e-05	0.856479	0.977397	34.2774	1.19989	29.3579	1309	382									IPR005103	Glycoside hydrolase, family 61	AA9	Lytic polysaccharide monooxygenase (formerly GH61)	x
343340	0.0351174	1.37024e-44	0.10258	1.15102e-33	75.763	2.6606	7.77174	2748	916					KOG4674	Uncharacterized conserved coiled-coil protein	Function unknown	POORLY CHARACTERIZED
344201	0.03539	1.66547e-18	0.108334	2.98796e-12	34.9563	1.2371	3.78696	1833	611					KOG3803	Transcription factor containing C2HC type Zn finger	Transcription	INFORMATION STORAGE AND PROCESSING
295386	0.0354148	3.4078e-09	2.34553	0.010618	35.0097	1.23986	82.1162	2115	692			membrane	GO:0016020	KOG1287	Amino acid transporters	Amino acid transport and metabolism	METABOLISM	IPR004841	Amino acid permease-associated region
362954	0.035756	1.80382e-06	0.700639	0.678601	624.376	22.3252	437.462	964	183					KOG1216	von Willebrand factor and related coagulation proteins	Extracellular structures	CELLULAR PROCESSES AND SIGNALING	IPR014005	Extracellular membrane protein, 8-cysteine region, fungi			x	x
164027	0.0357862	3.86614e-22	0.101581	5.23286e-17	41.3731	1.48059	4.20271	1431	477	3.2.1.21	Beta-glucosidase.	beta-glucosidase activity	GO:0008422					IPR002772	Glycoside hydrolase, family 3, C-terminal
46755	0.035849	2.19458e-13	0.0274197	5.58057e-13	21.7274	0.778906	0.595758	666	222
348520	0.0360176	0.00799123	0.0519295	0.00999704	35.3071	1.27168	1.83348	888	296
24945	0.0362461	0.00377267	0.545397	0.720491	3.80884	0.138056	2.07733	159	53					KOG1840	Kinesin light chain	Cytoskeleton	CELLULAR PROCESSES AND SIGNALING
325644	0.0362894	3.86693e-06	0.335261	0.00602469	1030.82	37.4078	345.593	992	195			glycolipid binding	GO:0051861	KOG3221	Glycolipid transfer protein	Carbohydrate transport and metabolism	METABOLISM	IPR014830	Glycolipid transfer protein, GLTP
277048	0.0365582	4.50306e-38	0.896126	0.807886	549.357	20.0835	492.293	1299	262			zinc ion binding	GO:0008270					IPR011011	Zinc finger, FYVE/PHD-type
364331	0.0367814	9.07765e-70	0.39069	6.9732e-08	120.522	4.43296	47.0866	1233	298	2.4.1.186	Glycogenin glucosyltransferase.	glycogenin glucosyltransferase activity	GO:0008466	KOG1950	Glycosyl transferase, family 8 - glycogenin	Carbohydrate transport and metabolism	METABOLISM	IPR002495	Glycosyl transferase, family 8	GT8	Glycosyltransferase Family 8 protein
363943	0.0370242	6.7244e-140	0.685898	0.027038	240.781	8.91474	165.151	467	121					KOG2747	Histone acetyltransferase (MYST family)	Chromatin structure and dynamics	INFORMATION STORAGE AND PROCESSING
208951	0.0370445	1.56351e-72	0.178267	1.69823e-29	292.41	10.8322	52.1271	330	110			acyl-CoA binding	GO:0000062	KOG0817	Acyl-CoA-binding protein	Lipid transport and metabolism	METABOLISM	IPR000582	Acyl-CoA-binding protein, ACBP
366867	0.0371742	1.42583e-13	0.0187245	5.61309e-14	22.1412	0.823079	0.414583	3066	1022
272480	0.0375771	1.64505e-14	0.122011	5.76916e-09	23.799	0.8943	2.90376	827	216	5.3.3.5	Cholestenol delta-isomerase.	cholestenol delta-isomerase activity	GO:0047750	KOG4826	C-8,7 sterol isomerase	Lipid transport and metabolism	METABOLISM	IPR007905	Emopamil-binding
279494	0.0375858	6.61834e-34	0.454755	9.73876e-06	57.7114	2.16913	26.2446	1649	485	1.2.1.16	Succinate-semialdehyde dehydrogenase (NAD(P)+).	succinate-semialdehyde dehydrogenase [NAD(P)+] activity	GO:0009013	KOG2451	Aldehyde dehydrogenase	Energy production and conversion	METABOLISM	IPR016161	Aldehyde/histidinol dehydrogenase
362447	0.0377385	8.02305e-33	0	6.0425e-37	234.662	8.8558	0	545	129													x	x
289022	0.0381514	6.57596e-27	0.283602	3.97834e-10	47.4169	1.80902	13.4475	2366	702					KOG2992	Nucleolar GTPase/ATPase p130	Nuclear structure	CELLULAR PROCESSES AND SIGNALING
360565	0.0382375	2.67996e-14	0.0050102	3.03397e-15	740.057	28.2979	3.70783	1187	339	1.1.1.215	Gluconate 2-dehydrogenase.	gluconate dehydrogenase activity	GO:0008875	KOG0069	Glyoxylate/hydroxypyruvate reductase (D-isomer-specific 2-hydroxy acid dehydrogenase superfamily)	Energy production and conversion	METABOLISM	IPR016040	NAD(P)-binding
336192	0.0388754	5.53678e-26	0.129113	2.78234e-20	619.282	24.0749	79.9572	1163	170					KOG0471	Alpha-amylase	Carbohydrate transport and metabolism	METABOLISM					x	x
285927	0.0394095	4.16713e-18	2.20066	0.000855843	76.2504	3.00499	167.801	1502	375	4.1.1.21	Phosphoribosylaminoimidazole carboxylase.	ATP binding	GO:0005524	KOG2835	Phosphoribosylamidoimidazole-succinocarboxamide synthase	Nucleotide transport and metabolism	METABOLISM	IPR016185	PreATP-grasp-like fold
362429	0.0401475	2.09944e-16	0.111437	4.00863e-13	81.4891	3.27158	9.08089	2174	713			intracellular	GO:0005622	KOG2992	Nucleolar GTPase/ATPase p130	Nuclear structure	CELLULAR PROCESSES AND SIGNALING	IPR001357	BRCT
363326	0.0409859	3.65895e-14	0.078668	1.21916e-12	604.444	24.7737	47.5504	847	253
232497	0.040989	6.3897e-160	0.442239	2.70205e-17	332.992	13.649	147.262	1431	477	3.4.13.20	Beta-Ala-His dipeptidase.	protein dimerization activity	GO:0046983	KOG2276	Metalloexopeptidases	Amino acid transport and metabolism	METABOLISM	IPR011650	Peptidase M20, dimerisation
289046	0.0416734	0.00144623	0.579982	0.498683	138.179	5.7584	80.1416	944	298											GH131	Glycoside Hydrolase Family 131 protein	x
330219	0.0422903	1.89581e-30	0.0864458	1.2996e-24	1184.93	50.1109	102.432	649	121			carbon-sulfur lyase activity	GO:0016846	KOG4192	Uncharacterized conserved protein	Function unknown	POORLY CHARACTERIZED	IPR006913	Glutathione-dependent formaldehyde-activating, GFA
346574	0.0424871	0.0117977	0	0.00678077	3.03222	0.12883	0	1743	581									IPR017853	Glycoside hydrolase, catalytic core
314353	0.0428492	2.99385e-39	0.187193	6.13307e-25	483.523	20.7186	90.5122	826	227			regulation of transcription, DNA-dependent	GO:0006355	KOG3149	Transcription initiation factor IIF, auxiliary subunit	Transcription	INFORMATION STORAGE AND PROCESSING	IPR005033	YEATS
287390	0.0429598	4.96183e-33	0.648373	0.377042	101.296	4.35165	65.6776	737	226
360656	0.0432477	1.29743e-25	0.1748	1.58498e-12	43.8654	1.89708	7.66765	722	176
358855	0.0433175	1.15837e-27	0.51724	0.00130161	47.8394	2.07228	24.7445	5918	1857			zinc ion binding	GO:0008270	KOG1807	Helicases	Replication, recombination and repair	INFORMATION STORAGE AND PROCESSING	IPR000967	Zinc finger, NF-X1-type
275954	0.0435759	1.26803e-12	0	5.80347e-14	55.9289	2.43715	0	881	198
347883	0.0436869	7.09047e-10	0.0706096	4.37952e-09	1375.17	60.077	97.1004	591	197			peroxiredoxin activity	GO:0051920	KOG0852	Alkyl hydroperoxide reductase, thiol specific antioxidant and related enzymes	Posttranslational modification, protein turnover, chaperones	CELLULAR PROCESSES AND SIGNALING	IPR012336	Thioredoxin-like fold
27163	0.0436947	9.78142e-13	0	2.67755e-14	21.0109	0.918065	0	1014	338			ATPase activity, coupled to transmembrane movement of substances	GO:0042626	KOG0055	Multidrug/pheromone exporter, ABC superfamily	Secondary metabolites biosynthesis, transport and catabolism	METABOLISM	IPR011527	ABC transporter, transmembrane region, type 1
214849	0.0442782	1.69475e-57	0.355066	8.19028e-07	289.702	12.8275	102.863	264	88
281988	0.0445398	5.71818e-16	0.0751992	1.86459e-14	237.287	10.5687	17.8438	1803	558	3.5.4.4	Adenosine deaminase.	deoxyadenosine deaminase activity	GO:0046936	KOG1097	Adenine deaminase/adenosine deaminase	Nucleotide transport and metabolism	METABOLISM	IPR001365	Adenosine/AMP deaminase
345149	0.0447509	2.36045e-06	0.0871426	1.55085e-05	339.556	15.1954	29.5898	1143	381									IPR005556	SUN	GH132	Glycoside Hydrolase Family 132 protein	x
278370	0.045724	1.22904e-05	0	2.84058e-06	8.38441	0.383368	0	356	74
209427	0.0463467	0.000147094	0.00770359	5.83087e-05	6.51058	0.301744	0.0501548	879	293
350052	0.0465635	4.13895e-38	0.511909	0.0292312	66.8954	3.11488	34.2443	1356	452			zinc ion binding	GO:0008270	KOG4159	Predicted E3 ubiquitin ligase	Posttranslational modification, protein turnover, chaperones	CELLULAR PROCESSES AND SIGNALING	IPR001841	Zinc finger, RING-type
341223	0.0465983	1.03246e-09	0.775783	0.926032	146.591	6.83092	113.723	1806	602
342867	0.0466014	0.000158568	3.74941	0.0363063	14.0774	0.656026	52.782	1059	353					KOG1215	Low-density lipoprotein receptors containing Ca2+-binding EGF-like domains	Signal transduction mechanisms	CELLULAR PROCESSES AND SIGNALING
361155	0.0466836	1.69972e-07	1.39331	0.0377916	26.3118	1.22833	36.6604	1776	592			oxidoreductase activity	GO:0016491					IPR002198	Short-chain dehydrogenase/reductase SDR
167282	0.0470645	6.64099e-06	0.1402	0.000105971	1489.18	70.0877	208.784	1437	479			microtubule-based process	GO:0007017					IPR017853	Glycoside hydrolase, catalytic core	GH72	Glycoside Hydrolase Family 72 protein	x
361220	0.0470893	2.65706e-12	87.0928	2.12126e-06	65.5718	3.08773	5710.83	519	122													x	x
356495	0.0474287	4.24501e-16	0.276152	2.6095e-07	119.442	5.66498	32.9841	2007	618	1.1.99.1	Choline dehydrogenase.	choline dehydrogenase activity	GO:0008812	KOG1238	Glucose dehydrogenase/choline dehydrogenase/mandelonitrile lyase (GMC oxidoreductase family)	General function prediction only	POORLY CHARACTERIZED	IPR000172	Glucose-methanol-choline oxidoreductase, N-terminal	AA3+AF8-2	GMC oxidoreductase	x
357683	0.0478913	3.23315e-24	0.0734916	3.3768e-21	42.129	2.01761	3.09612	1575	525	3.4.23.5	Cathepsin D.	cathepsin D activity	GO:0004192	KOG1339	Aspartyl protease	Posttranslational modification, protein turnover, chaperones	CELLULAR PROCESSES AND SIGNALING	IPR009007	Peptidase aspartic, catalytic
360082	0.0482268	1.68318e-19	0.702402	0.527827	67.1177	3.23688	47.1437	2921	932
223849	0.0482699	1.27102e-26	0.632926	0.062832	46.5314	2.24606	29.4509	1725	575	1.1.99.1	Choline dehydrogenase.	choline dehydrogenase activity	GO:0008812	KOG1238	Glucose dehydrogenase/choline dehydrogenase/mandelonitrile lyase (GMC oxidoreductase family)	General function prediction only	POORLY CHARACTERIZED	IPR000172	Glucose-methanol-choline oxidoreductase, N-terminal	AA3+AF8-2	GMC oxidoreductase
351692	0.0489358	4.84543e-09	0.0109272	8.32163e-10	17.0954	0.836575	0.186805	1416	472
161611	0.0491635	0.000272231	3.60903	0.172231	23.1312	1.13721	83.4811	975	325			carbohydrate metabolic process	GO:0005975					IPR017853	Glycoside hydrolase, catalytic core	GH3	Glycoside Hydrolase Family 3 protein	x
350697	0.0494477	2.26203e-05	0.0103863	1.06266e-05	179.668	8.88416	1.86608	189	63
191942	0.0498545	2.17838e-08	0.00131412	2.74949e-09	579.975	28.9144	0.762155	1359	453	2.1.1.79	Cyclopropane-fatty-acyl-phospholipid synthase.	cyclopropane-fatty-acyl-phospholipid synthase activity	GO:0008825	KOG1269	SAM-dependent methyltransferases	General function prediction only	POORLY CHARACTERIZED	IPR003333	Cyclopropane-fatty-acyl-phospholipid synthase
282956	0.0507233	2.23277e-15	1.21602	0.344499	26.4384	1.34104	32.1495	2136	712
164531	0.0507268	1.76447e-54	0.146135	1.0459e-37	120.256	6.10022	17.5737	570	190			bromide peroxidase activity	GO:0019806	KOG0541	Alkyl hydroperoxide reductase/peroxiredoxin	Posttranslational modification, protein turnover, chaperones	CELLULAR PROCESSES AND SIGNALING	IPR012336	Thioredoxin-like fold
211922	0.0508482	7.2003e-219	0.874362	0.61891	473.677	24.0856	414.165	1320	440	4.2.1.11	Phosphopyruvate hydratase.	glycolysis	GO:0006096	KOG2670	Enolase	Carbohydrate transport and metabolism	METABOLISM	IPR000941	Enolase
357770	0.0508495	6.7675e-104	0.471745	6.40576e-15	191.689	9.7473	90.4283	2983	973	2.7.7.6	DNA-directed RNA polymerase.	RNA polymerase activity	GO:0034062	KOG1216	von Willebrand factor and related coagulation proteins	Extracellular structures	CELLULAR PROCESSES AND SIGNALING	IPR011004	Trimeric LpxA-like
68516	0.0513363	2.5495e-30	0.080326	6.61234e-27	180.827	9.283	14.5251	891	297			membrane	GO:0016020					IPR001499	Fungal pheromone STE3 GPCR
356579	0.0514116	4.21484e-52	0.190483	2.90514e-27	219.992	11.3101	41.9049	705	157
364999	0.0517467	1.8744e-57	1.4624	4.61965e-09	102.873	5.32335	150.442	1306	349	3.2.2.1	Purine nucleosidase.	purine nucleosidase activity	GO:0008477	KOG2938	Predicted inosine-uridine preferring nucleoside hydrolase	Nucleotide transport and metabolism	METABOLISM	IPR001910	Inosine/uridine-preferring nucleoside hydrolase
221201	0.0517783	2.02817e-45	0.0768627	8.07705e-40	81.3062	4.2099	6.24941	261	87					KOG3383	Uncharacterized conserved protein	Function unknown	POORLY CHARACTERIZED	IPR002740	Protein of unknown function DUF55
359763	0.0519547	3.30453e-24	0.692985	0.600489	134.083	6.96625	92.9176	846	254			metabolic process	GO:0008152					IPR016040	NAD(P)-binding
327006	0.0527302	8.4805e-125	0.0247291	3.3564e-150	11053.6	582.858	273.345	820	156
346585	0.0528094	2.53129e-10	0.0409857	2.72919e-10	17.1518	0.905774	0.702977	1185	395					KOG1216	von Willebrand factor and related coagulation proteins	Extracellular structures	CELLULAR PROCESSES AND SIGNALING
362829	0.0529431	9.88174e-05	0.00106005	3.7542e-05	136.301	7.21621	0.144486	762	254
350362	0.053518	2.02461e-56	0.128394	9.01739e-41	101.593	5.43703	13.0439	3051	1017	6.3.2.-	Acid--D-amino-acid ligases (peptide synthases).	coenzyme F420-2 alpha-glutamyl ligase activity	GO:0043774	KOG1187	Serine/threonine protein kinase	Signal transduction mechanisms	CELLULAR PROCESSES AND SIGNALING	IPR000679	Zinc finger, GATA-type
278994	0.0535792	2.7351e-10	0.183553	5.56846e-07	428.72	22.9705	78.6929	1937	449			GTPase activity	GO:0003924	KOG1375	Beta tubulin	Cytoskeleton	CELLULAR PROCESSES AND SIGNALING	IPR008280	Tubulin/FtsZ, C-terminal
364116	0.0538257	5.8049e-12	1.02196	0.710832	35.9093	1.93284	36.6979	1674	558			proteolysis	GO:0006508					IPR009007	Peptidase aspartic, catalytic
273369	0.0538706	5.45443e-10	2.76719	0.222545	16.5371	0.890863	45.7612	946	313					KOG0255	Synaptic vesicle transporter SVOP and related transporters (major facilitator superfamily)	General function prediction only	POORLY CHARACTERIZED	IPR016196	MFS general substrate transporter
364032	0.0538833	1.68619e-12	0.116593	3.46918e-10	79.1645	4.26565	9.23002	6771	2257	3.6.1.3	Adenosinetriphosphatase.	ATPase activity, coupled to transmembrane movement of substances	GO:0042626	KOG0298	DEAD box-containing helicase-like transcription factor/DNA repair protein	Replication, recombination and repair	INFORMATION STORAGE AND PROCESSING	IPR017441	Protein kinase ATP binding, conserved site
349437	0.0545396	5.21263e-17	0.225063	1.35391e-08	29.6978	1.6197	6.68387	849	283
187448	0.0545903	5.21158e-40	0.281343	3.40641e-12	74.0159	4.04055	20.8238	711	237			phosphoglycolate phosphatase activity	GO:0008967					IPR006439	HAD-superfamily hydrolase, subfamily IA, variant 1
18826	0.0548096	4.0609e-101	0.263185	4.50971e-13	213.628	11.7089	56.2238	405	135													x	x
161111	0.0550698	0.000655766	2.14347	0.240951	59.4305	3.27283	127.388	1380	460	3.2.1.21	Beta-glucosidase.	beta-glucosidase activity	GO:0008422					IPR002772	Glycoside hydrolase, family 3, C-terminal	GH3	Glycoside Hydrolase Family 3 protein
361226	0.055286	2.31581e-27	0.200553	8.80241e-14	94.4899	5.22397	18.9502	1365	455			membrane	GO:0016020					IPR006757	Opioid growth factor receptor (OGFr) conserved region
365854	0.0552915	0.00202448	0.00113757	0.00100138	265.743	14.6933	0.302302	1214	350	1.6.5.5	NADPH:quinone reductase.	NADPH:quinone reductase activity	GO:0003960	KOG1198	Zinc-binding oxidoreductase	General function prediction only	POORLY CHARACTERIZED	IPR016040	NAD(P)-binding
187159	0.0553855	4.88313e-10	0.0351548	8.34486e-10	57.2107	3.16864	2.01123	402	134			copper ion binding	GO:0005507					IPR002355	Multicopper oxidase, copper-binding site
167835	0.0555367	1.2371e-21	0.525517	0.0285574	310.756	17.2583	163.307	387	129
345121	0.0559122	5.53689e-10	0	1.44483e-11	16.7663	0.937438	0	393	131													x	x
348666	0.0561371	1.65468e-12	0.592488	0.0808978	2048.83	115.015	1213.91	1938	646			translational initiation	GO:0006413	KOG2302	T-type voltage-gated Ca2+ channel, pore-forming alpha1I subunit	Inorganic ion transport and metabolism	METABOLISM	IPR016027	Nucleic acid-binding, OB-fold-like
366492	0.0565009	1.16398e-08	0	5.31135e-10	14.3257	0.809415	0	1101	367			catalytic activity	GO:0003824					IPR009003	Peptidase, trypsin-like serine and cysteine
167557	0.05654	4.79876e-18	0.796513	0.797551	237.918	13.4519	189.505	801	267					KOG4715	SWI/SNF-related matrix-associated actin-dependent regulator of chromatin	Chromatin structure and dynamics	INFORMATION STORAGE AND PROCESSING
360125	0.0565935	1.87868e-05	8.13814	0	33.9249	1.91993	276.086	1018	268	3.5.1.41	Chitin deacetylase.	chitin deacetylase activity	GO:0004099					IPR011330	Glycoside hydrolase/deacetylase, beta/alpha-barrel	CE4	Carbohydrate Esterase Family 4 protein	x
279251	0.0567997	1.51943e-06	0.730311	0.698198	61.5746	3.49742	44.9686	1861	466					KOG1216	von Willebrand factor and related coagulation proteins	Extracellular structures	CELLULAR PROCESSES AND SIGNALING					x
313832	0.0569093	1.40038e-45	0.468964	2.01114e-05	417.291	23.7477	195.695	1199	332	1.6.5.5	NADPH:quinone reductase.	NADPH:quinone reductase activity	GO:0003960	KOG1197	Predicted quinone oxidoreductase	General function prediction only	POORLY CHARACTERIZED	IPR016040	NAD(P)-binding
285125	0.0569101	1.00313e-25	1.00506	0.330026	46.1313	2.62534	46.365	2003	664									IPR002110	Ankyrin
317963	0.0573498	1.85128e-60	0.0602605	6.72118e-58	134.391	7.70731	8.09849	453	60
362845	0.0576433	7.51994e-23	0.0270612	1.44698e-24	41.0354	2.36542	1.11047	1092	364
350606	0.0579813	3.97123e-28	0.143189	5.90273e-20	52.0326	3.01692	7.45052	543	181			imidazoleglycerol-phosphate dehydratase activity	GO:0004424	KOG3143	Imidazoleglycerol-phosphate dehydratase	Amino acid transport and metabolism	METABOLISM	IPR000807	Imidazole glycerol-phosphate dehydratase
351820	0.0586141	2.40297e-29	0.0744117	1.72314e-27	634.43	37.1866	47.2091	1524	508	2.7.7.23	UDP-N-acetylglucosamine pyrophosphorylase.	UDP-N-acetylglucosamine diphosphorylase activity	GO:0003977	KOG2388	UDP-N-acetylglucosamine pyrophosphorylase	Cell wall/membrane/envelope biogenesis	CELLULAR PROCESSES AND SIGNALING	IPR002618	UTP--glucose-1-phosphate uridylyltransferase
366580	0.0588345	3.02783e-09	0.387781	0.034474	15.552	0.914995	6.03079	937	259
167645	0.0588731	0.0244492	1.27095	0.685311	2.58659	0.15228	3.28744	324	108
351805	0.0591044	8.602e-100	0.258463	2.74181e-23	1117.71	66.0614	288.886	1365	455
279020	0.0593483	1.20887e-56	0.00488764	3.15676e-79	123	7.29982	0.601177	1841	516			regulation of transcription, DNA-dependent	GO:0006355	KOG0528	HMG-box transcription factor SOX5	Transcription	INFORMATION STORAGE AND PROCESSING	IPR009071	High mobility group box, HMG
350151	0.0594399	1.5641e-108	1.71838	1.63725e-13	199.856	11.8794	343.429	2151	717	3.2.1.58	Glucan 1,3-beta-glucosidase.	glucan 1,3-beta-glucosidase activity	GO:0004338	KOG3816	Cell differentiation regulator of the Headcase family	Signal transduction mechanisms	CELLULAR PROCESSES AND SIGNALING	IPR017853	Glycoside hydrolase, catalytic core	GH17	Glycoside Hydrolase Family 17 protein
292779	0.0595993	1.13077e-20	0.176678	2.27858e-11	129.818	7.73704	22.936	1078	294			protein binding	GO:0005515					IPR011333	BTB/POZ fold
319973	0.0596356	2.49976e-36	2.04955	0	155.544	9.27593	318.794	1048	184			cyanate metabolic process	GO:0009439					IPR003712	Cyanate lyase, C-terminal
365581	0.060012	1.16631e-06	1.83174	0.00492745	10.657	0.639548	19.5208	1073	258			protein binding	GO:0005515					IPR011333	BTB/POZ fold
343290	0.0601682	2.13957e-15	0.0733401	5.07572e-14	31.0201	1.86642	2.27501	1086	362
31689	0.0603996	3.1637e-135	0.408863	1.21025e-09	262.383	15.8478	107.279	444	148									IPR005198	Glycoside hydrolase, family 76	GH76	Glycoside Hydrolase Family 76 protein
286510	0.060635	2.79913e-17	0.637025	0.0708706	153.662	9.31729	97.8864	1205	346					KOG1269	SAM-dependent methyltransferases	General function prediction only	POORLY CHARACTERIZED	IPR013217	Methyltransferase type 12
357481	0.0610276	4.09884e-74	0.040503	1.84342e-98	186.914	11.4069	7.57058	612	150					KOG2401	Predicted MutS-related protein involved in mismatch repair	Replication, recombination and repair	INFORMATION STORAGE AND PROCESSING	IPR002625	Smr protein/MutS2 C-terminal
344734	0.0611114	2.25085e-77	0.0936021	3.18976e-89	324.792	19.8485	30.4012	1578	526			sterol 14-demethylase activity	GO:0008398	KOG0684	Cytochrome P450	Secondary metabolites biosynthesis, transport and catabolism	METABOLISM	IPR001128	Cytochrome P450
360374	0.0613341	2.29383e-53	1.22476	0.349879	99.9467	6.13014	122.411	1825	545			integral to membrane	GO:0016021	KOG2533	Permease of the major facilitator superfamily	Carbohydrate transport and metabolism	METABOLISM	IPR016196	MFS general substrate transporter
275646	0.0613925	1.35074e-11	0.133114	4.022e-09	57.8483	3.55145	7.70041	3369	1123	3.6.1.3	Adenosinetriphosphatase.	ATPase activity, coupled to transmembrane movement of substances	GO:0042626	KOG1001	Helicase-like transcription factor HLTF/DNA helicase RAD5, DEAD-box superfamily	Replication, recombination and repair	INFORMATION STORAGE AND PROCESSING	IPR001650	DNA/RNA helicase, C-terminal
285727	0.0617964	0.00106031	0.704408	0.660015	366.995	22.679	258.515	1976	603
280603	0.0618166	2.00226e-14	0.37217	3.84531e-05	73.0376	4.51494	27.1824	1728	563			nucleoside-triphosphatase activity	GO:0017111	KOG2227	Pre-initiation complex, subunit CDC6, AAA+ superfamily ATPase	Cell cycle control, cell division, chromosome partitioning	METABOLISM	IPR003593	AAA+ ATPase, core
297478	0.0629153	1.79566e-48	0.638616	0.227365	90.1223	5.67007	57.5535	3345	1115	2.7.3.-	Phosphotransferases with a nitrogenous group as acceptor.	histone arginine kinase activity	GO:0018110	KOG0519	Sensory transduction histidine kinase	Signal transduction mechanisms	CELLULAR PROCESSES AND SIGNALING	IPR003594	ATP-binding region, ATPase-like
353635	0.0629466	4.52261e-19	1.09693	0.326583	34.5559	2.17518	37.9055	1158	386	3.1.1.47	2-acetyl-1-alkylglycerophosphocholine esterase.	1-alkyl-2-acetylglycerophosphocholine esterase activity	GO:0003847	KOG2445	Nuclear pore complex component (sc Seh1)	Intracellular trafficking, secretion, and vesicular transport	CELLULAR PROCESSES AND SIGNALING	IPR011046	WD40 repeat-like
359603	0.0630237	1.53915e-16	0.119864	8.84465e-13	29.4256	1.85451	3.52706	14815	4890	1.2.1.31	Aminoadipate-semialdehyde dehydrogenase.	aminoadipate-semialdehyde dehydrogenase complex	GO:0005949	KOG1178	Non-ribosomal peptide synthetase/alpha-aminoadipate reductase and related enzymes	Secondary metabolites biosynthesis, transport and catabolism	METABOLISM	IPR009081	Acyl carrier protein-like
318185	0.0630286	5.04271e-35	0.992096	0.744389	72.7664	4.58637	72.1912	580	113
277240	0.0630464	3.58984e-28	0.976643	0.570406	55.1135	3.47471	53.8263	2944	937					KOG2127	Calmodulin-binding protein CRAG, contains DENN domain	Signal transduction mechanisms	CELLULAR PROCESSES AND SIGNALING	IPR005113	uDENN
362673	0.0631155	8.99805e-12	0.336078	8.55451e-05	140.075	8.84093	47.0763	1155	290			metabolic process	GO:0008152	KOG4288	Predicted oxidoreductase	General function prediction only	POORLY CHARACTERIZED	IPR016040	NAD(P)-binding
351464	0.0631997	6.7297e-09	0.151916	5.19261e-07	393.024	24.839	59.7065	1854	618					KOG1187	Serine/threonine protein kinase	Signal transduction mechanisms	CELLULAR PROCESSES AND SIGNALING
329118	0.063305	4.63091e-12	0.0226223	4.89196e-13	41.1621	2.60576	0.931182	723	152
302215	0.0634755	3.9745e-58	1.23236	0.00121812	129.521	8.22142	159.616	1523	434			aromatic amino acid family biosynthetic process	GO:0009073	KOG4492	Chorismate synthase	Amino acid transport and metabolism	METABOLISM	IPR000453	Chorismate synthase
169505	0.0636991	3.87581e-17	0.252157	5.27891e-08	30.7911	1.96137	7.76419	921	307			epoxide hydrolase activity	GO:0004301	KOG4178	Soluble epoxide hydrolase	Lipid transport and metabolism	METABOLISM	IPR000073	Alpha/beta hydrolase fold-1
357399	0.0638114	5.91155e-25	0.326917	2.1196e-06	112.928	7.20609	36.9181	2573	726			ATP binding	GO:0005524	KOG0742	AAA+-type ATPase	Posttranslational modification, protein turnover, chaperones	CELLULAR PROCESSES AND SIGNALING	IPR003593	AAA+ ATPase, core
343671	0.0638204	8.76356e-09	0.0200665	1.36497e-09	19.6893	1.25658	0.395096	1110	370			oxidoreductase activity	GO:0016491	KOG2614	Kynurenine 3-monooxygenase and related flavoprotein monooxygenases	General function prediction only	POORLY CHARACTERIZED	IPR003042	Aromatic-ring hydroxylase
357056	0.0639752	1.98125e-18	2.06173	3.69361e-08	56.4889	3.61389	116.465	804	268			zinc ion binding	GO:0008270	KOG1721	FOG: Zn-finger	General function prediction only	POORLY CHARACTERIZED	IPR007087	Zinc finger, C2H2-type
345216	0.0641266	0.00148987	0.0209181	0.000756413	4.91273	0.315036	0.102765	429	143			carbon utilization	GO:0015976					IPR001765	Carbonic anhydrase
361778	0.064221	6.34393e-58	1.28369	0.0138236	119.678	7.68586	153.63	2469	793	3.6.1.-	In phosphorous-containing anhydrides.	ATP-dependent 5'-3' DNA helicase activity	GO:0043141	KOG0351	ATP-dependent DNA helicase	Replication, recombination and repair	INFORMATION STORAGE AND PROCESSING	IPR001650	DNA/RNA helicase, C-terminal
281956	0.0642744	5.76974e-17	0.596072	0.034822	82.8694	5.32637	49.3961	1940	548	6.2.1.12	4-coumarate--CoA ligase.	4-coumarate-CoA ligase activity	GO:0016207	KOG1176	Acyl-CoA synthetase	Lipid transport and metabolism	METABOLISM	IPR000873	AMP-dependent synthetase and ligase
285052	0.0645128	1.03392e-39	1.4575	0.247581	78.7604	5.08105	114.793	1455	407			oxidoreductase activity	GO:0016491	KOG0430	Xanthine dehydrogenase	Nucleotide transport and metabolism	METABOLISM	IPR008274	Aldehyde oxidase and xanthine dehydrogenase, molybdopterin binding
211898	0.0648711	4.11095e-11	0.334128	0.00052875	19.388	1.25772	6.47805	2058	686			nucleobase, nucleoside, nucleotide and nucleic acid metabolic process	GO:0006139	KOG2475	CDC45 (cell division cycle 45)-like protein	Replication, recombination and repair	INFORMATION STORAGE AND PROCESSING	IPR006172	DNA-directed DNA polymerase, family B
355060	0.0649783	4.42586e-34	0.297178	1.32084e-13	67.6149	4.3935	20.0937	1821	607			hydrolase activity, acting on carbon-nitrogen (but not peptide) bonds	GO:0016810					IPR011059	Metal-dependent hydrolase, composite			x
22109	0.0650716	2.02848e-21	0.611167	0.038766	570.874	37.1477	348.899	765	255					KOG3803	Transcription factor containing C2HC type Zn finger	Transcription	INFORMATION STORAGE AND PROCESSING
337107	0.0651329	7.79636e-78	0.350273	5.39591e-18	492.841	32.1002	172.629	809	114					KOG0123	Polyadenylate-binding protein (RRM superfamily)	RNA processing and modification	INFORMATION STORAGE AND PROCESSING
282772	0.0653559	3.75887e-54	0.0305705	6.59837e-67	324.988	21.2399	9.93504	1748	455					KOG4177	Ankyrin	Cell wall/membrane/envelope biogenesis	CELLULAR PROCESSES AND SIGNALING	IPR002110	Ankyrin
47557	0.0655761	3.30501e-08	0	1.60571e-09	18.8942	1.23901	0	540	180
344174	0.0656523	8.54547e-08	1.41968	0.370739	13.0611	0.857491	18.5425	1092	364	3.6.1.-	In phosphorous-containing anhydrides.	ATP-dependent 5'-3' DNA helicase activity	GO:0043141	KOG2510	SWI-SNF chromatin-remodeling complex protein	Chromatin structure and dynamics	INFORMATION STORAGE AND PROCESSING
286199	0.065653	7.13371e-28	0.576471	0.0312751	66.3236	4.35434	38.2336	1430	452					KOG0101	Molecular chaperones HSP70/HSC70, HSP70 superfamily	Posttranslational modification, protein turnover, chaperones	CELLULAR PROCESSES AND SIGNALING
208015	0.0662864	2.79204e-33	0.440221	1.57936e-05	175.08	11.6054	77.0737	1497	499			proton-transporting two-sector ATPase complex	GO:0016469	KOG2232	Ceramidases	Signal transduction mechanisms	CELLULAR PROCESSES AND SIGNALING	IPR000194	ATPase, F1/V1/A1 complex, alpha/beta subunit, nucleotide-binding
299028	0.066428	6.29333e-11	0.192473	1.52889e-05	19.1661	1.27317	3.68897	2076	692	2.4.1.16	Chitin synthase.	chitin biosynthetic process	GO:0006031	KOG2571	Chitin synthase/hyaluronan synthase (glycosyltransferases)	Cell wall/membrane/envelope biogenesis	CELLULAR PROCESSES AND SIGNALING	IPR004834	Chitin synthase	GT2	Glycosyltransferase Family 2 protein
24102	0.0665551	2.18828e-13	1.29156	0.0378152	165.794	11.0345	214.134	681	227					KOG4157	beta-1,6-N-acetylglucosaminyltransferase, contains WSC domain	Carbohydrate transport and metabolism	METABOLISM
284539	0.0673038	1.60803e-10	0.534052	0.114499	19.3002	1.29898	10.3073	825	243					KOG4177	Ankyrin	Cell wall/membrane/envelope biogenesis	CELLULAR PROCESSES AND SIGNALING	IPR002110	Ankyrin
212512	0.0675531	2.57821e-78	0.667436	0.0746956	147.656	9.97465	98.5512	1383	461	3.4.11.5	Prolyl aminopeptidase.	prolyl aminopeptidase activity	GO:0016804					IPR000073	Alpha/beta hydrolase fold-1
363807	0.0675982	1.06944e-10	1.96368	0.0213608	125.955	8.51432	247.335	1238	278			zinc ion binding	GO:0008270	KOG1721	FOG: Zn-finger	General function prediction only	POORLY CHARACTERIZED	IPR007087	Zinc finger, C2H2-type
164943	0.0677245	2.28621e-33	0.570642	0.000128469	486.896	32.9748	277.844	1056	352			MAP kinase activity	GO:0004707	KOG0660	Mitogen-activated protein kinase	Signal transduction mechanisms	CELLULAR PROCESSES AND SIGNALING	IPR011009	Protein kinase-like
352549	0.0681281	1.46742e-49	0.247622	7.30795e-25	233.182	15.8862	57.7409	786	262
309159	0.0682337	0	0.622174	0.0623524	872.645	59.5438	542.938	952	177					KOG4157	beta-1,6-N-acetylglucosaminyltransferase, contains WSC domain	Carbohydrate transport and metabolism	METABOLISM					x	x
200726	0.0686418	0.0281033	0	0.0131742	2.59577	0.178179	0	468	156
352402	0.0690822	4.49899e-94	0.386611	5.89122e-22	437.107	30.1963	168.99	1653	551					KOG4225	Sorbin and SH3 domain-containing protein	Signal transduction mechanisms	CELLULAR PROCESSES AND SIGNALING	IPR013026	Tetratricopeptide region
163021	0.0690935	2.85306e-07	0.454129	0.0195171	407.273	28.1399	184.954	591	197			protein transport	GO:0015031	KOG0393	Ras-related small GTPase, Rho type	General function prediction only	POORLY CHARACTERIZED	IPR005225	Small GTP-binding protein
357378	0.0691161	6.83211e-16	0.23203	3.55443e-08	28.9684	2.00218	6.72156	849	283
45895	0.0691305	2.56373e-13	0.808637	0.922696	62.8335	4.34372	50.8095	315	105									IPR006461	Protein of unknown function Cys-rich
280605	0.0691945	2.40256e-14	0.190273	3.38584e-08	289.423	20.0265	55.0694	3288	1051			metal ion binding	GO:0046872	KOG0961	Predicted Zn2+-dependent endopeptidase, insulinase superfamily	Posttranslational modification, protein turnover, chaperones	CELLULAR PROCESSES AND SIGNALING	IPR011249	Metalloenzyme, LuxS/M16 peptidase-like, metal-binding
305351	0.0693484	2.12686e-17	0.344223	3.95181e-07	390.716	27.0955	134.493	606	89					KOG1263	Multicopper oxidases	Secondary metabolites biosynthesis, transport and catabolism	METABOLISM			AA1	Multicopper oxidase
297254	0.0694315	3.45373e-27	0.881192	0.918914	50.8208	3.52856	44.7829	719	221
362639	0.0695116	7.13371e-28	0.602978	0.427278	52.7863	3.66926	31.829	1030	237					KOG1869	Splicing coactivator SRm160/300, subunit SRm300	RNA processing and modification	INFORMATION STORAGE AND PROCESSING
334105	0.0695237	2.18326e-07	0.191646	4.22026e-05	1075.74	74.7895	206.161	1011	191	2.7.7.6	DNA-directed RNA polymerase.	RNA polymerase activity	GO:0034062	KOG3655	Drebrins and related actin binding proteins	Cytoskeleton	CELLULAR PROCESSES AND SIGNALING					x	x
288177	0.0696647	1.16244e-52	0.400783	2.65935e-10	142.453	9.92393	57.0927	2141	578									IPR016196	MFS general substrate transporter
350842	0.069734	7.51652e-25	0.82139	0.904433	78.589	5.48033	64.5522	1284	428			integral to membrane	GO:0016021	KOG1397	Ca2+/H+ antiporter VCX1 and related proteins	Inorganic ion transport and metabolism	METABOLISM	IPR004837	Sodium/calcium exchanger membrane region
289012	0.0699211	0.00559476	0.00538286	0.00279459	184.301	12.8865	0.992066	1633	393			metabolic process	GO:0008152	KOG2741	Dimeric dihydrodiol dehydrogenase	Secondary metabolites biosynthesis, transport and catabolism	METABOLISM	IPR016040	NAD(P)-binding
353347	0.0699608	2.42914e-14	6.35591	0.00109056	26.0282	1.82095	165.433	993	331	3.5.1.41	Chitin deacetylase.	chitin deacetylase activity	GO:0004099	KOG4742	Predicted chitinase	General function prediction only	POORLY CHARACTERIZED	IPR011330	Glycoside hydrolase/deacetylase, beta/alpha-barrel	CBM18+AC0-CE4	Carbohydrate+AC0-Binding Module Family 18 / Carbohydrate Esterase Family 4 protein	x
346049	0.0699618	7.77061e-06	0.0483881	7.56664e-06	9.48048	0.663272	0.458743	720	240
282200	0.0701374	7.88514e-15	0.120962	1.69586e-12	171.293	12.014	20.7199	2150	656	1.1.99.5	Glycerol-3-phosphate dehydrogenase.	oxidoreductase activity	GO:0016491	KOG0042	Glycerol-3-phosphate dehydrogenase	Energy production and conversion	METABOLISM	IPR000447	FAD-dependent glycerol-3-phosphate dehydrogenase
297390	0.0702117	1.8721e-129	0.381357	4.63083e-08	301.641	21.1787	115.033	1063	346
294883	0.0702125	1.20571e-17	0.659015	0.499995	32.3087	2.26848	21.2919	1103	351	5.1.1.-	Acting on amino acids and derivatives.	pyridoxal phosphate binding	GO:0030170	KOG1251	Serine racemase	Amino acid transport and metabolism	METABOLISM	IPR001926	Pyridoxal phosphate-dependent enzyme, beta subunit
366618	0.0702285	1.65942e-12	0.346451	2.34578e-05	624.231	43.8389	216.265	490	119
298065	0.0703744	2.09182e-16	0	4.86618e-20	29.9482	2.10759	0	312	79
299277	0.070515	1.18569e-20	2.33569	8.99161e-09	227.821	16.0648	532.118	1283	341	1.1.1.37	Malate dehydrogenase.	metabolic process	GO:0008152	KOG1494	NAD-dependent malate dehydrogenase	Energy production and conversion	METABOLISM	IPR015955	Lactate dehydrogenase/glycoside hydrolase, family 4, C-terminal
316474	0.0707547	7.30014e-89	0.0310351	1.1273e-141	243.532	17.231	7.55805	970	161
343864	0.0708175	0.00108235	0.777724	0.911467	5.33281	0.377656	4.14746	657	219			beta-carotene 15,15'-monooxygenase activity	GO:0003834	KOG1285	Beta, beta-carotene 15,15'-dioxygenase and related enzymes	Secondary metabolites biosynthesis, transport and catabolism	METABOLISM	IPR004294	Carotenoid oxygenase
194263	0.0710064	3.63911e-11	1.13999	0.41267	19.7527	1.40257	22.5179	1779	593			integral to membrane	GO:0016021	KOG0254	Predicted transporter (major facilitator superfamily)	General function prediction only	POORLY CHARACTERIZED	IPR016196	MFS general substrate transporter
294056	0.0711924	6.92508e-21	0.0697302	1.78177e-19	197.185	14.0381	13.7497	1118	337			carbohydrate transport	GO:0008643	KOG2234	Predicted UDP-galactose transporter	Carbohydrate transport and metabolism	METABOLISM	IPR004689	UDP-galactose transporter
169784	0.0715024	1.09801e-17	0.569656	0.0474819	32.5124	2.32472	18.5209	2964	988	6.5.1.1	DNA ligase (ATP).	intracellular	GO:0005622	KOG0966	ATP-dependent DNA ligase IV	Replication, recombination and repair	INFORMATION STORAGE AND PROCESSING	IPR001357	BRCT
343694	0.071679	2.03431e-05	0.0530952	1.61224e-05	405.884	29.0934	21.5505	1326	442					KOG1187	Serine/threonine protein kinase	Signal transduction mechanisms	CELLULAR PROCESSES AND SIGNALING
168481	0.0717674	3.08146e-35	0.61193	0.554864	66.6085	4.78032	40.7597	1701	567	1.6.99.3	NADH dehydrogenase.	NADH dehydrogenase activity	GO:0003954	KOG2495	NADH-dehydrogenase (ubiquinone)	Energy production and conversion	METABOLISM	IPR013027	FAD-dependent pyridine nucleotide-disulphide oxidoreductase
207882	0.0720653	1.46927e-17	0.377857	2.78299e-05	117.66	8.47922	44.4587	729	243					KOG2232	Ceramidases	Signal transduction mechanisms	CELLULAR PROCESSES AND SIGNALING	IPR006823	Neutral/alkaline nonlysosomal ceramidase
166036	0.0722094	0.000109848	0.0364742	6.57541e-05	561.364	40.5358	20.4753	315	105									IPR009009	Barwin-related endoglucanase	EXPN	Distantly related to plant expansins
365452	0.0724477	0.00684728	0.191717	0.0296554	16.6554	1.20665	3.19313	2286	762			protein amino acid dephosphorylation	GO:0006470	KOG1720	Protein tyrosine phosphatase CDC14	Defense mechanisms	CELLULAR PROCESSES AND SIGNALING	IPR000387	Protein-tyrosine phosphatase
314898	0.0725229	3.68306e-06	0.0846122	9.72114e-06	1131.17	82.0357	95.7107	1700	330													x
349055	0.0727617	5.24321e-13	0	1.76065e-15	47.2403	3.43729	0	1122	374
297757	0.0732639	3.12066e-55	0.237794	6.41633e-29	113.624	8.32457	27.0192	815	226					KOG1509	Predicted nucleic acid-binding protein ASMTL	Cell cycle control, cell division, chromosome partitioning	METABOLISM	IPR003697	Maf-like protein
351992	0.0736378	2.09754e-23	4.34979	3.50837e-07	43.9075	3.23325	190.988	966	322									IPR013217	Methyltransferase type 12
355601	0.0737036	5.59812e-06	4.27887	0.022662	9.78212	0.720978	41.8565	1535	501			calcium ion binding	GO:0005509	KOG0471	Alpha-amylase	Carbohydrate transport and metabolism	METABOLISM	IPR017853	Glycoside hydrolase, catalytic core	GH13+AF8-5	Glycoside Hydrolase Family 13 protein
356864	0.0739182	2.94746e-12	0.255145	5.91342e-06	22.2311	1.64329	5.67216	786	93													x	x
354169	0.0740846	3.59632e-12	0.856275	0.947712	159.529	11.8187	136.601	867	289					KOG4157	beta-1,6-N-acetylglucosaminyltransferase, contains WSC domain	Carbohydrate transport and metabolism	METABOLISM	IPR002889	Carbohydrate-binding WSC
357398	0.0746935	7.45043e-18	0.413409	7.50739e-05	112.284	8.38687	46.4191	3429	1109			nucleoside-triphosphatase activity	GO:0017111	KOG0056	Heavy metal exporter HMT1, ABC superfamily	Inorganic ion transport and metabolism	METABOLISM	IPR011527	ABC transporter, transmembrane region, type 1
342202	0.0748285	1.09273e-16	0.052535	4.22593e-17	30.9982	2.31955	1.62849	1941	647									IPR011009	Protein kinase-like
77912	0.0750275	4.03133e-12	0.0465458	2.9957e-12	122.045	9.15673	5.68068	159	53
220774	0.0751589	7.81946e-09	0.141884	8.81336e-07	143.557	10.7896	20.3684	459	153
280445	0.0764656	3.27276e-97	0.220307	6.87967e-62	226.427	17.3139	49.8834	1622	464					KOG0958	DNA damage-responsive repressor GIS1/RPH1, jumonji superfamily	Replication, recombination and repair	INFORMATION STORAGE AND PROCESSING	IPR003347	Transcription factor jumonji/aspartyl beta-hydroxylase
169127	0.0766711	1.95897e-09	0.490777	0.0466841	16.7205	1.28198	8.20605	735	245			signal transduction	GO:0007165					IPR008936	Rho GTPase activation protein
221178	0.0767184	2.19081e-70	0.42871	1.39564e-08	157.194	12.0597	67.3907	1500	500	1.2.1.3	Aldehyde dehydrogenase (NAD+).	aldehyde dehydrogenase (NAD) activity	GO:0004029	KOG2450	Aldehyde dehydrogenase	Energy production and conversion	METABOLISM	IPR016161	Aldehyde/histidinol dehydrogenase
355768	0.0767539	9.53288e-09	0.740725	0.69633	15.3605	1.17898	11.3779	1029	343
327531	0.0768349	2.06187e-61	2.37241	7.85623e-06	2373.5	182.367	5630.91	564	79
314031	0.0775021	1.1343e-06	0.111479	4.8489e-06	325.135	25.1986	36.2456	1419	307	3.2.1.58	Glucan 1,3-beta-glucosidase.	glucan 1,3-beta-glucosidase activity	GO:0004338					IPR017853	Glycoside hydrolase, catalytic core	GH17	Glycoside Hydrolase Family 17 protein	x
274142	0.0775772	1.77618e-31	0.428096	3.71184e-07	64.4258	4.99798	27.5804	1243	296													x	x
345077	0.0777072	7.77923e-63	0.615999	0.000586547	122.352	9.50762	75.3685	1623	541					KOG4157	beta-1,6-N-acetylglucosaminyltransferase, contains WSC domain	Carbohydrate transport and metabolism	METABOLISM	IPR011043	Galactose oxidase/kelch, beta-propeller
60364	0.077859	0.00110537	0	0.000215757	5.41586	0.421674	0	378	126									IPR009057	Homeodomain-like
365049	0.0779248	3.18702e-07	0.0852606	1.20128e-06	12.4619	0.97109	1.06251	3986	1294					KOG4157	beta-1,6-N-acetylglucosaminyltransferase, contains WSC domain	Carbohydrate transport and metabolism	METABOLISM	IPR011047	Quinonprotein alcohol dehydrogenase-like			x
319011	0.078078	1.32749e-08	0.156394	0.000154886	15.1835	1.18549	2.3746	556	60
208047	0.0782069	0.00151706	0.911803	0.913221	5.10718	0.399417	4.65674	2070	690
337110	0.0784088	2.35258e-78	1.22618	0.135592	3175.83	249.013	3894.14	819	169	5.2.1.8	Peptidylprolyl isomerase.	cyclophilin-type peptidyl-prolyl cis-trans isomerase activity	GO:0042027	KOG0865	Cyclophilin type peptidyl-prolyl cis-trans isomerase	Posttranslational modification, protein turnover, chaperones	CELLULAR PROCESSES AND SIGNALING	IPR015891	Cyclophilin-like
329983	0.0784279	5.72884e-17	0.204202	5.71089e-10	31.8683	2.49937	6.50758	605	105
362623	0.0786792	9.55546e-35	0.514302	0.000618123	67.2023	5.28743	34.5623	905	264			oxidoreductase activity	GO:0016491					IPR008922	Di-copper centre-containing
340848	0.0789261	2.0148e-22	0	1.87014e-28	42.9401	3.3891	0	471	157
229415	0.079088	8.22837e-09	0.523054	0.162109	992.647	78.5064	519.208	726	242
19470	0.0793165	0.000623426	0.0794969	0.000875959	347.384	27.5533	27.616	324	108													x	x
346238	0.0794432	5.07078e-07	0	1.36495e-08	12.063	0.958326	0	774	258
311369	0.0800993	3.04519e-83	0.512532	0.0139596	666.097	53.3538	341.396	602	160			translation	GO:0006412	KOG3412	60S ribosomal protein L28	Translation, ribosomal structure and biogenesis	INFORMATION STORAGE AND PROCESSING	IPR002672	Ribosomal protein L28e
362250	0.0802312	2.83533e-05	0.208397	0.000796082	379.339	30.4349	79.053	1060	283			oxidoreductase activity	GO:0016491	KOG2852	Possible oxidoreductase	General function prediction only	POORLY CHARACTERIZED	IPR006076	FAD dependent oxidoreductase
351566	0.0802944	2.79256e-58	0.837794	1	201.292	16.1626	168.641	960	320					KOG2510	SWI-SNF chromatin-remodeling complex protein	Chromatin structure and dynamics	INFORMATION STORAGE AND PROCESSING
363058	0.0805041	2.19452e-27	1.18697	0.0238851	53.5448	4.31058	63.5564	575	138
216785	0.0806623	7.76205e-05	4.69273	0.19501	7.79114	0.628451	36.5617	921	307	3.1.4.4	Phospholipase D.	phospholipase D activity	GO:0004630	KOG1721	FOG: Zn-finger	General function prediction only	POORLY CHARACTERIZED
357672	0.0809521	3.26341e-27	0.118064	9.78991e-26	200.92	16.2649	23.7213	1344	298			C-4 methylsterol oxidase activity	GO:0000254	KOG0873	C-4 sterol methyl oxidase	Lipid transport and metabolism	METABOLISM	IPR006088	Sterol desaturase
201800	0.0809918	2.03575e-06	0.609605	0.25762	47.5248	3.84912	28.9714	672	224
286052	0.0810114	3.39764e-07	0.280216	0.00390921	245.741	19.9078	68.8604	1495	290			extracellular region	GO:0005576	KOG3017	Defense-related protein containing SCP domain	Function unknown	POORLY CHARACTERIZED	IPR014044	SCP-like extracellular			x	x
318277	0.0811043	1.60954e-09	0.544217	0.215105	17.982	1.45842	9.78612	523	60
364468	0.0811105	1.36146e-08	1.1616	0.285427	15.2732	1.23882	17.7414	1965	655			apoptosis	GO:0006915	KOG1840	Kinesin light chain	Cytoskeleton	CELLULAR PROCESSES AND SIGNALING	IPR013026	Tetratricopeptide region
341487	0.0811235	1.45984e-56	1.01509	0.350972	127.967	10.3811	129.898	1179	393					KOG4157	beta-1,6-N-acetylglucosaminyltransferase, contains WSC domain	Carbohydrate transport and metabolism	METABOLISM
273434	0.081266	6.88307e-18	0.262938	1.58e-08	34.7464	2.8237	9.13615	1563	487			zinc ion binding	GO:0008270					IPR001138	Fungal transcriptional regulatory protein, N-terminal
278019	0.0817295	4.70537e-30	0.091405	5.41774e-30	155.291	12.6918	14.1944	987	329	2.7.1.15	Ribokinase.	D-ribose metabolic process	GO:0006014	KOG2855	Ribokinase	Carbohydrate transport and metabolism	METABOLISM	IPR002173	Carbohydrate/puine kinase, PfkB, conserved site
341568	0.0820046	1.73177e-08	0.678609	0.442201	401.223	32.9021	272.274	1020	340					KOG2948	Predicted metal-binding protein	General function prediction only	POORLY CHARACTERIZED	IPR003226	Metal-dependent protein hydrolase
349615	0.0821431	1.11347e-53	3.59915	0	224.24	18.4198	807.074	516	172			cytoplasm	GO:0005737	KOG1727	Microtubule-binding protein (translationally controlled tumor protein)	Cytoskeleton	CELLULAR PROCESSES AND SIGNALING	IPR011057	Mss4-like
196124	0.0827625	5.09899e-23	0.464775	0.000192987	70.1391	5.80489	32.5989	975	325	3.5.4.12	dCMP deaminase.	dCMP deaminase activity	GO:0004132	KOG3127	Deoxycytidylate deaminase	Nucleotide transport and metabolism	METABOLISM	IPR016193	Cytidine deaminase-like
187124	0.0828448	3.89423e-11	0.2887	2.20756e-05	47.4783	3.93333	13.707	1185	395					KOG0118	FOG: RRM domain	General function prediction only	POORLY CHARACTERIZED
277478	0.082919	2.57718e-14	0.174491	1.76961e-10	256.662	21.2822	44.7853	1860	398	1.17.4.1	Ribonucleoside-diphosphate reductase.	transition metal ion binding	GO:0046914	KOG1567	Ribonucleotide reductase, beta subunit	Nucleotide transport and metabolism	METABOLISM	IPR009078	Ferritin/ribonucleotide reductase-like
362667	0.0830888	8.42165e-22	0.754989	0.537995	45.4132	3.77333	34.2865	4005	1280			calcium ion binding	GO:0005509	KOG0769	Predicted mitochondrial carrier protein	Energy production and conversion	METABOLISM	IPR001993	Mitochondrial substrate carrier
281805	0.0833351	0.0127326	26.9456	2.67667e-05	3.36456	0.280386	90.6599	2122	651									IPR002110	Ankyrin
356657	0.0837221	4.48448e-15	0.215067	1.93237e-09	111.265	9.31537	23.9295	1586	480	2.4.2.30	NAD(+) ADP-ribosyltransferase.	protein amino acid ADP-ribosylation	GO:0006471	KOG1037	NAD+ ADP-ribosyltransferase Parp, required for poly-ADP ribosylation of nuclear proteins	Posttranslational modification, protein turnover, chaperones	CELLULAR PROCESSES AND SIGNALING	IPR004102	Poly(ADP-ribose) polymerase, regulatory region
353694	0.0837372	2.50633e-53	0.229585	3.18027e-30	136.13	11.3992	31.2534	1332	444			oxidoreductase activity	GO:0016491					IPR001395	Aldo/keto reductase
282885	0.0840236	4.01928e-20	0.38528	1.13458e-05	38.7648	3.25716	14.9353	1003	295			DNA repair	GO:0006281	KOG4161	Methyl-CpG binding transcription regulators	Chromatin structure and dynamics	INFORMATION STORAGE AND PROCESSING	IPR011257	DNA glycosylase
346159	0.0845474	3.24172e-08	0	3.03337e-10	14.6515	1.23875	0	1284	428
365646	0.0845831	1.44301e-18	0.116558	1.00016e-17	108.355	9.16503	12.6296	1570	428	1.3.99.10	Isovaleryl-CoA dehydrogenase.	isovaleryl-CoA dehydrogenase activity	GO:0008470	KOG0141	Isovaleryl-CoA dehydrogenase	Lipid transport and metabolism	METABOLISM	IPR009100	Acyl-CoA dehydrogenase/oxidase, middle and N-terminal
348110	0.084631	8.67798e-24	1.2105	0.00547537	46.84	3.96412	56.6997	3819	1273					KOG1878	Nuclear receptor coregulator SMRT/SMRTER, contains Myb-like domains	Transcription	INFORMATION STORAGE AND PROCESSING
277856	0.0846656	2.30218e-05	1.33336	0.140052	8.86262	0.750359	11.8171	2484	828									IPR010308	Protein of unknown function DUF907, fungi
232720	0.085059	1.7388e-24	1.30091	0.266115	76.361	6.49519	99.339	2514	838									IPR017853	Glycoside hydrolase, catalytic core	GH36	Glycoside Hydrolase Family 36 protein
289306	0.0851165	2.26693e-09	1.3756	0.00402596	68.6592	5.84403	94.4476	1393	369	2.7.7.13	Mannose-1-phosphate guanylyltransferase.	mannose-1-phosphate guanylyltransferase activity	GO:0004475	KOG1322	GDP-mannose pyrophosphorylase/mannose-1-phosphate guanylyltransferase	Cell wall/membrane/envelope biogenesis	CELLULAR PROCESSES AND SIGNALING	IPR011004	Trimeric LpxA-like
295436	0.0852213	1.4114e-33	0.551942	0.00156171	240.277	20.4767	132.619	1758	502	1.14.14.1	Unspecific monooxygenase.	unspecific monooxygenase activity	GO:0050381	KOG0157	Cytochrome P450 CYP4/CYP19/CYP26 subfamilies	Secondary metabolites biosynthesis, transport and catabolism	METABOLISM	IPR001128	Cytochrome P450
276959	0.0852264	8.14828e-32	2.97205	0	68.2516	5.81684	202.847	1903	626	3.2.1.20	Alpha-glucosidase.	alpha-glucosidase activity	GO:0004558	KOG0471	Alpha-amylase	Carbohydrate transport and metabolism	METABOLISM	IPR017853	Glycoside hydrolase, catalytic core	GH13+AF8-40	Glycoside Hydrolase Family 13 protein
342373	0.0852294	0.0009505	0	0.000146393	5.672	0.483421	0	462	154
153723	0.0852671	1.09025e-08	0	6.91665e-11	15.6418	1.33373	0	255	85
277175	0.085307	2.84188e-09	1.6901	0.0990435	16.8655	1.43874	28.5043	1167	389			zinc ion binding	GO:0008270	KOG1721	FOG: Zn-finger	General function prediction only	POORLY CHARACTERIZED	IPR007087	Zinc finger, C2H2-type
21292	0.0855192	4.56355e-17	0.42924	0.016371	32.7413	2.80001	14.0539	927	309
279077	0.0857344	1.221e-106	0.555745	0.116702	270.651	23.2041	150.413	371	95					KOG4618	Uncharacterized conserved protein	Function unknown	POORLY CHARACTERIZED	IPR009069	MTCP1
160358	0.0863212	6.20996e-77	0.392239	3.37904e-11	276.465	23.8648	108.44	1287	429			cation transmembrane transporter activity	GO:0008324	KOG1341	Na+/K+ transporter	Inorganic ion transport and metabolism	METABOLISM	IPR003445	Cation transporter
281175	0.0863856	2.19249e-06	0.272581	0.000559944	504.086	43.5458	137.404	1508	352			signal transduction	GO:0007165	KOG0082	G-protein alpha subunit (small G protein superfamily)	Signal transduction mechanisms	CELLULAR PROCESSES AND SIGNALING	IPR011025	G protein alpha subunit, helical insertion
273336	0.0872827	0.000620409	1.04917	0.778196	9.5105	0.830102	9.97813	1175	355					KOG1216	von Willebrand factor and related coagulation proteins	Extracellular structures	CELLULAR PROCESSES AND SIGNALING			AA11	Lytic polysaccharide monooxygenase	x
286485	0.0873628	8.83287e-18	0.450314	0.000739338	34.4901	3.01315	15.5314	3510	943	2.1.1.17	Phosphatidylethanolamine N-methyltransferase.	phosphatidylethanolamine N-methyltransferase activity	GO:0004608					IPR009081	Acyl carrier protein-like
297257	0.0874791	1.08734e-24	0.671937	0.135891	49.7792	4.35464	33.4485	698	200			calcium ion binding	GO:0005509	KOG0031	Myosin regulatory light chain, EF-Hand protein superfamily	Cytoskeleton	CELLULAR PROCESSES AND SIGNALING	IPR002048	Calcium-binding EF-hand
345908	0.0876684	9.90692e-26	0.98829	0.507477	51.7167	4.53392	51.1111	1407	469			zinc ion binding	GO:0008270	KOG1721	FOG: Zn-finger	General function prediction only	POORLY CHARACTERIZED	IPR007087	Zinc finger, C2H2-type
282777	0.0877111	1.78652e-18	0.115044	1.45187e-15	35.8709	3.14628	4.12674	1930	566					KOG1399	Flavin-containing monooxygenase	Secondary metabolites biosynthesis, transport and catabolism	METABOLISM	IPR013027	FAD-dependent pyridine nucleotide-disulphide oxidoreductase
287932	0.0877371	2.98035e-15	0.155025	2.28097e-11	29.9548	2.62815	4.64376	532	144
351625	0.0877523	1.17838e-09	2.03882	0.00512397	128.764	11.2993	262.527	2163	721					KOG1282	Serine carboxypeptidases (lysosomal cathepsin A)	Amino acid transport and metabolism	METABOLISM					x
286186	0.0877544	1.02e-09	0.357865	0.00169278	18.1654	1.59409	6.50075	2337	779			ATP binding	GO:0005524	KOG1969	DNA replication checkpoint protein CHL12/CTF18	Cell cycle control, cell division, chromosome partitioning	METABOLISM	IPR003593	AAA+ ATPase, core
301638	0.0879844	9.63899e-28	0.611603	0.00531131	134.605	11.8432	82.3249	2284	580	6.1.1.22	Asparagine--tRNA ligase.	asparaginyl-tRNA aminoacylation	GO:0006421	KOG0555	Asparaginyl-tRNA synthetase	Translation, ribosomal structure and biogenesis	INFORMATION STORAGE AND PROCESSING	IPR016027	Nucleic acid-binding, OB-fold-like
357988	0.0881319	0.000180542	4.79505	0.02844	45.0208	3.96777	215.877	1914	566			integral to membrane	GO:0016021	KOG0254	Predicted transporter (major facilitator superfamily)	General function prediction only	POORLY CHARACTERIZED	IPR016196	MFS general substrate transporter
359633	0.0881544	1.08053e-13	1.52518	0.000216687	26.0385	2.29541	39.7133	2331	777			calcium-dependent phospholipid binding	GO:0005544	KOG0819	Annexin	Intracellular trafficking, secretion, and vesicular transport	CELLULAR PROCESSES AND SIGNALING	IPR001464	Annexin
337076	0.0883171	1.27241e-08	0.106297	1.06464e-08	388.391	34.3015	41.2849	444	69
356523	0.0883418	2.97387e-98	0.0809601	1.209e-111	319.046	28.1851	25.83	568	187					KOG2992	Nucleolar GTPase/ATPase p130	Nuclear structure	CELLULAR PROCESSES AND SIGNALING
305318	0.0883727	7.62172e-18	0.966831	0.593547	428.811	37.8952	414.588	922	137			large ribosomal subunit	GO:0015934	KOG3401	60S ribosomal protein L26	Translation, ribosomal structure and biogenesis	INFORMATION STORAGE AND PROCESSING	IPR008991	Translation protein SH3-like
300404	0.0884517	1.61261e-25	0.198337	1.67197e-12	53.6505	4.74547	10.6409	1021	234	3.1.3.18	Phosphoglycolate phosphatase.	phosphoglycolate phosphatase activity	GO:0008967	KOG3109	Haloacid dehalogenase-like hydrolase	General function prediction only	POORLY CHARACTERIZED	IPR008266	Tyrosine protein kinase, active site
353408	0.0886025	1.14775e-38	2.14007	3.15337e-08	114.302	10.1274	244.614	1128	376					KOG2253	U1 snRNP complex, subunit SNU71 and related PWI-motif proteins	RNA processing and modification	INFORMATION STORAGE AND PROCESSING
359068	0.0888302	6.08435e-75	0.30005	3.62406e-15	254.608	22.6169	76.3952	1486	433	2.4.2.29	Queuine tRNA-ribosyltransferase.	queuosine biosynthetic process	GO:0008616	KOG3908	Queuine-tRNA ribosyltransferase	RNA processing and modification	INFORMATION STORAGE AND PROCESSING	IPR002616	Queuine/other tRNA-ribosyltransferase
182302	0.0890592	2.65507e-05	1.45917	0.0636548	8.84992	0.788167	12.9135	2484	828									IPR010308	Protein of unknown function DUF907, fungi
363047	0.0890818	4.90198e-30	0.17699	5.45877e-21	62.811	5.59532	11.1169	835	166
343672	0.0891191	2.54552e-06	0	1.03151e-07	16.8036	1.49752	0	531	177
279396	0.0891377	2.30465e-24	0.328899	9.51997e-10	54.93	4.89633	18.0664	1971	534									IPR003006	Immunoglobulin/major histocompatibility complex, conserved site
157041	0.0892839	3.83997e-17	0.707276	0.248544	320.25	28.5932	226.505	1443	481	1.10.3.2	Laccase.	laccase activity	GO:0008471	KOG1263	Multicopper oxidases	Secondary metabolites biosynthesis, transport and catabolism	METABOLISM	IPR008972	Cupredoxin	AA1+AF8-2	Ferroxidase	x
164149	0.0893754	1.40483e-11	0.095266	7.21088e-11	884.557	79.0577	84.2683	1530	510			heme binding	GO:0020037	KOG0158	Cytochrome P450 CYP3/CYP5/CYP6/CYP9 subfamilies	Secondary metabolites biosynthesis, transport and catabolism	METABOLISM	IPR001128	Cytochrome P450
192339	0.0895526	4.0172e-07	1.27484	0.3739	12.6988	1.13721	16.1889	1128	376
273795	0.0896998	6.59062e-54	0.103743	2.15194e-29	120.117	10.7745	12.4613	1677	457	3.1.3.2	Acid phosphatase.	acid phosphatase activity	GO:0003993	KOG3720	Lysosomal & prostatic acid phosphatases	Lipid transport and metabolism	METABOLISM	IPR000560	Histidine acid phosphatase
298018	0.0899465	3.03522e-41	0.221642	9.53299e-30	184.876	16.6289	40.9761	1867	448			nucleoside-triphosphatase activity	GO:0017111	KOG0745	Putative ATP-dependent Clp-type protease (AAA+ ATPase superfamily)	Posttranslational modification, protein turnover, chaperones	CELLULAR PROCESSES AND SIGNALING	IPR003593	AAA+ ATPase, core
330731	0.0900071	2.03393e-75	1.66506	0	3124.9	281.263	5203.15	559	119									IPR004360	Glyoxalase/bleomycin resistance protein/dioxygenase
284748	0.0903408	3.66101e-27	1.84114	2.16251e-14	54.2024	4.89669	99.7945	1668	520			integral to membrane	GO:0016021	KOG1172	Na+-independent Cl/HCO3 exchanger AE1 and related transporters (SLC4 family)	Inorganic ion transport and metabolism	METABOLISM	IPR011531	Bicarbonate transporter, C-terminal
169654	0.0904917	6.97332e-14	0.851809	1	154.599	13.99	131.689	2451	817			zinc ion binding	GO:0008270	KOG1721	FOG: Zn-finger	General function prediction only	POORLY CHARACTERIZED	IPR007087	Zinc finger, C2H2-type
357313	0.0908222	1.77633e-13	0.237391	1.30985e-07	166.026	15.0789	39.4132	507	169			metabolic process	GO:0008152	KOG2914	Predicted haloacid-halidohydrolase and related hydrolases	General function prediction only	POORLY CHARACTERIZED	IPR005834	Haloacid dehalogenase-like hydrolase
186867	0.0911402	1.11283e-38	1.1649	0.000625821	83.9452	7.65078	97.788	1386	462	1.14.11.9	Naringenin 3-dioxygenase.	naringenin 3-dioxygenase activity	GO:0045486	KOG0143	Iron/ascorbate family oxidoreductases	General function prediction only	POORLY CHARACTERIZED	IPR005123	2OG-Fe(II) oxygenase
293986	0.091188	2.2663e-76	0.108245	2.65333e-76	299.578	27.3179	32.4279	1708	462	2.6.1.13	Ornithine--oxo-acid aminotransferase.	ornithine-oxo-acid transaminase activity	GO:0004587	KOG1402	Ornithine aminotransferase	Amino acid transport and metabolism	METABOLISM	IPR015424	Pyridoxal phosphate-dependent transferase, major region
363300	0.0913978	2.95341e-10	1.8264	0.145157	84.475	7.72083	154.285	2322	774			1-phosphatidylinositol-3-phosphate 5-kinase activity	GO:0000285	KOG2806	Chitinase	Carbohydrate transport and metabolism	METABOLISM
285412	0.0914738	1.73622e-17	0.14848	4.51114e-14	98.7326	9.03145	14.6598	1101	367			transition metal ion binding	GO:0046914	KOG0536	Flavohemoprotein b5+b5R	Energy production and conversion	METABOLISM	IPR001199	Cytochrome b5
282708	0.0916073	1.01124e-06	1.24495	0.445441	11.8684	1.08723	14.7755	1562	481					KOG3599	Ca2+-modulated nonselective cation channel polycystin	Inorganic ion transport and metabolism	METABOLISM
311534	0.0917756	1.6463e-14	0.477403	0.004279	183.704	16.8595	87.7008	865	88
358620	0.0919613	9.7512e-16	0.457453	0.00157698	110.789	10.1883	50.681	2619	838	3.5.1.5	Urease.	urea metabolic process	GO:0019627					IPR002026	Urease, gamma subunit region
363486	0.0920682	0.0010828	0	0.000156644	5.59271	0.514911	0	393	131													x	x
50558	0.0922122	4.65361e-07	0.372586	0.0121502	32.9701	3.04025	12.2842	513	171									IPR008972	Cupredoxin
279161	0.0923212	4.72106e-10	1.64203	0.000312404	18.8529	1.74052	30.957	1881	627									IPR010730	Heterokaryon incompatibility
192200	0.0923628	2.78915e-05	0.100745	0.000243174	9.49267	0.876769	0.956337	921	307			hydrolase activity, acting on ester bonds	GO:0016788					IPR007312	Phosphoesterase
366004	0.0923989	5.32753e-06	0.522662	0.186641	10.4423	0.964854	5.45778	717	239
279676	0.0925584	1.78294e-05	3.73092	0.0620257	9.34737	0.865178	34.8743	858	210									IPR012816	Conserved hypothetical protein CHP02464
366536	0.0927652	3.73722e-30	1.7248	0	199.082	18.4679	343.377	1390	219
295109	0.0928829	3.69703e-69	0.146119	5.29103e-56	989.16	91.876	144.535	1051	256					KOG1216	von Willebrand factor and related coagulation proteins	Extracellular structures	CELLULAR PROCESSES AND SIGNALING					x	x
362176	0.093159	2.5859e-64	0.387044	1.25233e-09	131.465	12.2471	50.8827	1364	428					KOG1838	Alpha/beta hydrolase	General function prediction only	POORLY CHARACTERIZED	IPR012020	AB-hydrolase YheT, putative
230452	0.0938735	8.8384e-150	0.0208618	1.8193e-200	516.611	48.4961	10.7774	210	70
205584	0.0942867	1.25139e-85	0.0548958	8.0479e-107	6534.82	616.146	358.734	246	82			metal ion binding	GO:0046872	KOG1603	Copper chaperone	Inorganic ion transport and metabolism	METABOLISM	IPR006121	Heavy metal transport/detoxification protein
279730	0.0942957	4.76071e-20	0.626805	0.132526	65.704	6.1956	41.1836	1899	633					KOG2992	Nucleolar GTPase/ATPase p130	Nuclear structure	CELLULAR PROCESSES AND SIGNALING
205841	0.09445	2.07188e-78	0.125959	1.20167e-67	254.279	24.0166	32.0288	918	306			pyruvate dehydrogenase (acetyl-transferring) kinase activity	GO:0004740	KOG0787	Dehydrogenase kinase	Signal transduction mechanisms	CELLULAR PROCESSES AND SIGNALING	IPR003594	ATP-binding region, ATPase-like
293590	0.0945015	3.13296e-08	1.24731	0.165016	79.069	7.47214	98.6236	1283	314	2.4.2.1	Purine-nucleoside phosphorylase.	nucleobase, nucleoside, nucleotide and nucleic acid metabolic process	GO:0006139	KOG3984	Purine nucleoside phosphorylase	Nucleotide transport and metabolism	METABOLISM	IPR001369	Purine phosphorylase, family 2
347417	0.0947587	1.35638e-08	0.637211	0.489852	15.9083	1.50745	10.1369	453	151
34473	0.0951442	2.17578e-21	0.625486	0.149683	92.7833	8.82779	58.0347	555	185			catalytic activity	GO:0003824	KOG3275	Zinc-binding protein of the histidine triad (HIT) family	Signal transduction mechanisms	CELLULAR PROCESSES AND SIGNALING	IPR011146	Histidine triad-like motif
276226	0.095216	1.0904e-10	0.175568	4.71021e-08	67.6782	6.44405	11.8821	1227	310			transporter activity	GO:0005215	KOG0764	Mitochondrial FAD carrier protein	Energy production and conversion	METABOLISM	IPR001993	Mitochondrial substrate carrier
275373	0.0956198	3.52434e-11	1.01669	0.634673	21.4712	2.05307	21.8296	1599	533			transport	GO:0006810	KOG1289	Amino acid transporters	Amino acid transport and metabolism	METABOLISM	IPR004840	Amino acid permease, conserved site
319546	0.0961406	6.12764e-24	0.557426	0.00361075	64.944	6.24375	36.2015	1320	337	1.3.99.5	3-oxo-5-alpha-steroid 4-dehydrogenase.	3-oxo-5-alpha-steroid 4-dehydrogenase activity	GO:0003865	KOG1639	Steroid reductase required for elongation of the very long chain fatty acids	Lipid transport and metabolism	METABOLISM	IPR001104	3-oxo-5-alpha-steroid 4-dehydrogenase, C-terminal
339261	0.0963133	5.03515e-06	0.041799	1.09579e-06	258.418	24.8891	10.8016	1122	311	1.1.1.-	With NAD(+) or NADP(+) as acceptor.	(R)-2-hydroxyglutarate dehydrogenase activity	GO:0051990	KOG1577	Aldo/keto reductase family proteins	General function prediction only	POORLY CHARACTERIZED	IPR001395	Aldo/keto reductase
280874	0.096448	1.26599e-34	0.323291	1.09094e-12	71.0204	6.84978	22.9603	2243	609
311819	0.0965102	4.15614e-06	0.0170888	6.17655e-07	174.114	16.8037	2.9754	377	68
215102	0.0966363	2.07804e-33	1.50735	0.00420203	166.228	16.0637	250.564	1137	379			glycolipid 6-alpha-mannosyltransferase activity	GO:0033164					IPR007577	Glycosyltransferase sugar-binding region containing DXD motif	GT32	Glycosyltransferase Family 32 protein	x
356952	0.0967493	8.82642e-05	0.406102	0.0339157	180.043	17.4191	73.116	1429	168	3.6.1.-	In phosphorous-containing anhydrides.	ATP-dependent 5'-3' DNA helicase activity	GO:0043141	KOG2839	Diadenosine and diphosphoinositol polyphosphate phosphohydrolase	Signal transduction mechanisms	CELLULAR PROCESSES AND SIGNALING	IPR015797	NUDIX
196476	0.0968294	0.0317352	0	0.0112408	2.70696	0.262113	0	384	128
353913	0.0968601	4.57736e-09	0.0207325	6.0154e-11	17.1149	1.65775	0.354834	1767	589	1.11.1.6	Catalase.	response to oxidative stress	GO:0006979	KOG0047	Catalase	Inorganic ion transport and metabolism	METABOLISM	IPR011614	Catalase, N-terminal
275399	0.0970206	4.33297e-26	0.291387	3.8947e-06	61.9756	6.01291	18.0589	570	190
279538	0.0971545	2.83935e-18	0.81756	0.885983	117.043	11.3712	95.6897	799	158									IPR003807	Protein of unknown function DUF202
359459	0.0983686	0.00180782	0.161349	0.00711453	12.8973	1.26869	2.08097	1392	464
287817	0.0986188	1.18324e-08	0.978207	0.583845	16.6013	1.6372	16.2395	896	298					KOG0504	FOG: Ankyrin repeat	General function prediction only	POORLY CHARACTERIZED	IPR002110	Ankyrin
278893	0.0988921	9.99537e-24	0.416432	9.65124e-05	134.935	13.344	56.1912	1564	436	3.2.1.18	Exo-alpha-sialidase.	exo-alpha-sialidase activity	GO:0004308	KOG1778	CREB binding protein/P300 and related TAZ Zn-finger proteins	Transcription	INFORMATION STORAGE AND PROCESSING
356689	0.0990321	1.29795e-12	0.0299523	5.83e-15	24.7455	2.4506	0.741183	3121	1034			dynamin GTPase activity	GO:0008549	KOG0446	Vacuolar sorting protein VPS1, dynamin, and related proteins	General function prediction only	POORLY CHARACTERIZED	IPR001401	Dynamin, GTPase region
280301	0.099126	4.61292e-33	0.870614	0.839112	90.6004	8.98085	78.878	1946	537	5.4.2.3	Phosphoacetylglucosamine mutase.	phosphoacetylglucosamine mutase activity	GO:0004610	KOG2537	Phosphoglucomutase/phosphomannomutase	Carbohydrate transport and metabolism	METABOLISM	IPR016055	Alpha-D-phosphohexomutase, alpha/beta/alpha I, II and III
364978	0.0994777	5.30996e-15	0.587204	0.0643639	29.9519	2.97955	17.5879	1806	602			methylation	GO:0032259					IPR004043	LCCL
291739	0.0995995	2.74093e-44	0.665973	0.0297753	120.092	11.9611	79.9778	1007	294	3.4.22.-	Cysteine endopeptidases.	cysteine-type endopeptidase activity	GO:0004197	KOG4130	Prenyl protein protease	Posttranslational modification, protein turnover, chaperones	CELLULAR PROCESSES AND SIGNALING	IPR003675	Abortive infection protein
363617	0.0996531	1.81518e-06	0.103703	6.49874e-06	11.7151	1.16745	1.21489	492	128
357352	0.0998326	9.03095e-12	0.112262	1.05929e-10	23.683	2.36433	2.65869	826	198
339296	0.0999606	2.1747e-113	0.412371	8.16373e-12	837.407	83.7078	345.323	1130	280
357241	0.100251	1.08282e-09	0.86924	0.914039	55.8127	5.5953	48.5147	678	193			zinc ion binding	GO:0008270					IPR007087	Zinc finger, C2H2-type
166856	0.100554	2.65051e-16	1.42876	0.0279932	35.3636	3.55595	50.526	4506	1502
278418	0.100761	4.5748e-08	0.274102	0.00100892	15.262	1.53782	4.18335	1320	440	3.4.24.-	Metalloendopeptidases.	matrilysin-2 activity	GO:0030402	KOG2707	Predicted metalloprotease with chaperone activity (RNAse H/HSP70 fold)	Posttranslational modification, protein turnover, chaperones	CELLULAR PROCESSES AND SIGNALING	IPR000905	Peptidase M22, glycoprotease
358750	0.100771	4.71229e-06	0.24638	0.000517187	188.76	19.0215	46.5067	2006	594					KOG1704	FOG: LIM domain	General function prediction only	POORLY CHARACTERIZED
292629	0.100805	3.99073e-18	1.33651	0.000877139	37.5104	3.78122	50.1331	1187	296			inositol polyphosphate multikinase activity	GO:0050516	KOG1620	Inositol polyphosphate multikinase, component of the ARGR transcription regulatory complex	Lipid transport and metabolism	METABOLISM	IPR005522	Inositol polyphosphate kinase
350451	0.100873	3.57719e-37	0.441205	9.48746e-07	82.6424	8.33642	36.4623	636	212
359975	0.100953	6.12509e-52	0.713149	0.158691	121.186	12.2341	86.4236	913	122
13299	0.101497	2.76884e-08	0.0708296	2.09112e-08	1057.08	107.291	74.8728	543	181	1.15.1.1	Superoxide dismutase.	superoxide dismutase activity	GO:0004784					IPR001424	Superoxide dismutase, copper/zinc binding			x	x
367230	0.101508	1.85076e-19	2.83216	0.00110039	127.626	12.955	361.457	3085	962	2.7.7.6	DNA-directed RNA polymerase.	RNA polymerase activity	GO:0034062	KOG3712	RFX family transcription factor	Transcription	INFORMATION STORAGE AND PROCESSING	IPR000254	Cellulose-binding region, fungal			x
350887	0.101781	2.0532e-13	0.256327	7.41305e-07	26.6007	2.70746	6.8185	936	312	3.5.1.-	In linear amides.	N-acetylgalactosamine-6-phosphate deacetylase activity	GO:0047419	KOG2682	NAD-dependent histone deacetylases and class I sirtuins (SIR2 family)	Chromatin structure and dynamics	INFORMATION STORAGE AND PROCESSING	IPR003000	NAD-dependent histone deacetylase, silent information regulator Sir2
281236	0.102077	0.00349472	1.88255	0.18407	110.021	11.2306	207.121	1199	359									IPR006384	HAD-superfamily hydrolase, subfamily IB, hypothetical 1
309695	0.102265	4.79327e-24	0.474646	0.000460037	54.5956	5.58324	25.9136	1265	342	1.1.1.56	Ribitol 2-dehydrogenase.	ribitol 2-dehydrogenase activity	GO:0050255	KOG1210	Predicted 3-ketosphinganine reductase	Secondary metabolites biosynthesis, transport and catabolism	METABOLISM	IPR016040	NAD(P)-binding
322691	0.102759	1.50184e-09	0.0305491	4.98573e-11	18.3838	1.88909	0.561606	471	62
331797	0.102777	1.03504e-22	0.0109844	7.15235e-29	99.3443	10.2103	1.09124	404	54
337247	0.102884	5.04365e-07	0.458464	0.223299	103.986	10.6985	47.6738	599	64
311504	0.103181	2.60681e-18	0.497973	0.000367561	308.416	31.8227	153.583	968	194					KOG3381	Uncharacterized conserved protein	Function unknown	POORLY CHARACTERIZED	IPR002744	Protein of unknown function DUF59
347252	0.103441	6.49922e-05	3.49143	1.31242e-05	8.41901	0.87087	29.3944	2283	761									IPR002110	Ankyrin
291554	0.103501	1.17399e-26	0.572164	0.00845574	159.09	16.4659	91.0257	1006	232	2.4.2.9	Uracil phosphoribosyltransferase.	uracil phosphoribosyltransferase activity	GO:0004845	KOG4203	Armadillo/beta-Catenin/plakoglobin	Cytoskeleton	CELLULAR PROCESSES AND SIGNALING	IPR000836	Phosphoribosyltransferase
357706	0.103641	3.19601e-23	0.214931	3.25279e-14	75.8154	7.85755	16.2951	1177	379					KOG1721	FOG: Zn-finger	General function prediction only	POORLY CHARACTERIZED
361152	0.103741	1.23616e-11	0.0639389	1.62776e-11	23.3348	2.42078	1.492	1427	424
363441	0.103826	1.72795e-22	0.975606	0.330003	46.3967	4.81719	45.2649	1170	390													x
187984	0.103934	1.29677e-23	0.252283	1.2376e-17	469.237	48.7695	118.38	1716	572	1.5.1.12	1-pyrroline-5-carboxylate dehydrogenase.	oxidoreductase activity	GO:0016491	KOG2455	Delta-1-pyrroline-5-carboxylate dehydrogenase	Amino acid transport and metabolism	METABOLISM	IPR016161	Aldehyde/histidinol dehydrogenase
365570	0.104296	2.84579e-05	0.025282	4.31211e-06	20.1204	2.09849	0.508686	260	66													x	x
358953	0.104323	1.43403e-07	0.365043	0.0073254	14.1961	1.48099	5.1822	2157	719
355857	0.104325	3.89939e-12	0.125545	7.8988e-12	124.205	12.9578	15.5934	1542	450	3.2.1.73	Licheninase.	licheninase activity	GO:0042972	KOG3656	FOG: 7 transmembrane receptor	General function prediction only	POORLY CHARACTERIZED	IPR008985	Concanavalin A-like lectin/glucanase	CBM18+AC0-GH16	Carbohydrate+AC0-Binding Module Family 18 / Glycoside Hydrolase Family 16 protein	x
351099	0.104469	4.23434e-08	0.0347104	4.02219e-09	798.017	83.3682	27.6995	2454	818			chitin binding	GO:0008061	KOG4742	Predicted chitinase	General function prediction only	POORLY CHARACTERIZED	IPR014756	Immunoglobulin E-set	CBM18+AC0-CBM18+AC0-CBM18+AC0-AA5	Carbohydrate+AC0-Binding Module Family 18 / Copper radical oxidase	x
360573	0.104636	3.63834e-22	0.916303	0.895223	45.5335	4.76446	41.7225	4421	1440			FAD binding	GO:0050660	KOG0430	Xanthine dehydrogenase	Nucleotide transport and metabolism	METABOLISM	IPR016166	FAD-binding, type 2
353268	0.105022	0.0264915	0.00715395	0.012127	782.248	82.1534	5.59616	660	220			FMN binding	GO:0010181					IPR009002	FMN-binding split barrel, related
285172	0.105135	2.84845e-37	4.3638	0.00990159	104.45	10.9814	455.8	2012	559	5.4.2.2	Phosphoglucomutase.	phosphoglucomutase activity	GO:0004614	KOG0625	Phosphoglucomutase	Carbohydrate transport and metabolism	METABOLISM	IPR016055	Alpha-D-phosphohexomutase, alpha/beta/alpha I, II and III
282405	0.105215	3.13896e-17	0.573866	0.0330233	35.031	3.68577	20.1031	1290	400	3.1.21.-	Endodeoxyribonucleases producing 5'-phosphomonoesters.	endodeoxyribonuclease activity, producing 5'-phosphomonoesters	GO:0016888	KOG3020	TatD-related DNase	Replication, recombination and repair	INFORMATION STORAGE AND PROCESSING	IPR001130	Deoxyribonuclease, TatD-related
232597	0.105565	6.51823e-08	0.211755	7.99743e-06	139.768	14.7546	29.5965	2505	835					KOG1699	O-acetyltransferase	General function prediction only	POORLY CHARACTERIZED	IPR013830	Esterase, SGNH hydrolase-type
340729	0.105574	0.000390249	0.745893	0.94855	6.90572	0.729061	5.15093	348	116
316902	0.105762	7.16094e-09	0.204998	4.22775e-06	106.756	11.2907	21.8847	939	211					KOG3187	Protein tyrosine phosphatase-like protein PTPLA (contains Pro instead of catalytic Arg)	General function prediction only	POORLY CHARACTERIZED	IPR007482	Protein-tyrosine phosphatase-like, PTPLA
352023	0.10583	1.62388e-13	1.52387	0.04358	27.4081	2.90059	41.7664	717	239
357546	0.106181	7.5322e-10	0.325548	0.0121169	134.484	14.2797	43.7811	1332	391			tRNA aminoacylation for protein translation	GO:0006418	KOG1216	von Willebrand factor and related coagulation proteins	Extracellular structures	CELLULAR PROCESSES AND SIGNALING	IPR001412	Aminoacyl-tRNA synthetase, class I, conserved site	AA11	Lytic polysaccharide monooxygenase	x
317981	0.106188	1.00263e-07	0.115477	0.000126625	14.5544	1.5455	1.6807	341	56
277157	0.106364	9.44615e-92	0.441816	9.25305e-21	376.728	40.0704	166.445	685	202	1.10.2.2	Ubiquinol--cytochrome c reductase.	oxidoreductase activity	GO:0016491	KOG1671	Ubiquinol cytochrome c reductase, subunit RIP1	Energy production and conversion	METABOLISM	IPR004192	Ubiquinol cytochrome reductase transmembrane region
161505	0.106395	0.0292496	0	0.0091592	2.81004	0.298975	0	237	79					KOG0504	FOG: Ankyrin repeat	General function prediction only	POORLY CHARACTERIZED	IPR002110	Ankyrin
344338	0.10655	3.29163e-17	0	1.72387e-23	35.3508	3.76662	0	1152	384
278932	0.106878	4.21121e-11	0.932825	0.583739	91.9196	9.82414	85.7449	1284	428			arylesterase activity	GO:0004064					IPR002640	Arylesterase
325901	0.106985	2.30978e-42	0.756768	0.606731	221.837	23.7332	167.879	1839	515	2.7.1.40	Pyruvate kinase.	catalytic activity	GO:0003824	KOG2323	Pyruvate kinase	Carbohydrate transport and metabolism	METABOLISM	IPR015795	Pyruvate kinase, C-terminal-like
183808	0.107097	2.07557e-19	0.224111	1.08966e-11	41.3964	4.43343	9.27739	1491	497			transcription	GO:0006350					IPR001138	Fungal transcriptional regulatory protein, N-terminal
208849	0.10714	0.000295749	0.186724	0.0235024	7.06531	0.756976	1.31926	306	102			FAD binding	GO:0050660	KOG2335	tRNA-dihydrouridine synthase	Translation, ribosomal structure and biogenesis	INFORMATION STORAGE AND PROCESSING	IPR001269	Dihydrouridine synthase, DuS
362785	0.107461	3.65943e-12	0.774674	0.798977	58.8925	6.32867	45.6225	3120	1040			integral to membrane	GO:0016021	KOG4505	Na+/H+ antiporter	Inorganic ion transport and metabolism	METABOLISM	IPR013928	Alkali metal cation/H+ antiporter Nha1, C-terminal
232687	0.107676	2.40597e-05	1.57173	0.0393131	69.1039	7.44081	108.612	1041	347			L-threonine ammonia-lyase activity	GO:0004794	KOG1250	Threonine/serine dehydratases	Amino acid transport and metabolism	METABOLISM	IPR001926	Pyridoxal phosphate-dependent enzyme, beta subunit
353194	0.107779	6.0372e-32	0.307122	1.33096e-13	70.8811	7.63949	21.7691	2268	756			RNA binding	GO:0003723					IPR004088	K Homology, type 1
184204	0.107808	4.32075e-22	0.996035	0.464936	46.0845	4.9683	45.9018	717	239			DNA binding	GO:0003677					IPR009057	Homeodomain-like
279570	0.10791	2.00577e-08	0.21219	0.000136016	16.1454	1.74226	3.42589	321	107			intracellular	GO:0005622	KOG1721	FOG: Zn-finger	General function prediction only	POORLY CHARACTERIZED	IPR001138	Fungal transcriptional regulatory protein, N-terminal
303207	0.108098	1.79187e-20	1.45395	1.32065e-05	42.4604	4.5899	61.7352	2699	861					KOG3265	Histone chaperone involved in gene silencing	Chromatin structure and dynamics	INFORMATION STORAGE AND PROCESSING
279681	0.108234	9.08479e-06	15.0541	0.068269	10.392	1.12476	156.442	1103	281
354005	0.108348	6.23953e-17	2.75651	1.62536e-08	69.3071	7.5093	191.046	468	156
298072	0.108571	1.63461e-25	0.506094	0.000227617	110.83	12.0329	56.0905	1266	342	1.1.1.62	Estradiol 17 beta-dehydrogenase.	estradiol 17-beta-dehydrogenase activity	GO:0004303	KOG1014	17 beta-hydroxysteroid dehydrogenase type 3, HSD17B3	Lipid transport and metabolism	METABOLISM	IPR016040	NAD(P)-binding
304628	0.108795	9.71311e-09	0.664256	0.435091	146.268	15.9132	97.1595	1614	352	4.2.1.46	dTDP-glucose 4,6-dehydratase.	dTDP-glucose 4,6-dehydratase activity	GO:0008460	KOG0747	Putative NAD+-dependent epimerases	Carbohydrate transport and metabolism	METABOLISM	IPR016040	NAD(P)-binding
281759	0.108798	3.10764e-11	1.02117	0.511651	26.4165	2.87406	26.9757	963	321
357092	0.108883	2.00412e-11	0.466088	0.008213	24.1575	2.63035	11.2595	2841	909	3.1.-.-	Acting on ester bonds.	T/G mismatch-specific endonuclease activity	GO:0043765	KOG0442	Structure-specific endonuclease ERCC1-XPF, catalytic component XPF/ERCC4	Replication, recombination and repair	INFORMATION STORAGE AND PROCESSING	IPR011335	Restriction endonuclease, type II-like, core
279431	0.109338	9.51254e-39	0.600492	0.0160421	120.197	13.1421	72.1774	1145	310	2.5.1.6	Methionine adenosyltransferase.	methionine adenosyltransferase regulator activity	GO:0048270	KOG1430	C-3 sterol dehydrogenase/3-beta-hydroxysteroid dehydrogenase and related dehydrogenases	Lipid transport and metabolism	METABOLISM	IPR016040	NAD(P)-binding
352069	0.109508	1.97682e-26	1.336	3.68573e-05	56.0075	6.13326	74.8262	1017	339
185640	0.109613	2.47729e-17	1.26024	0.118	153.523	16.8281	193.476	1404	468			zinc ion binding	GO:0008270	KOG1721	FOG: Zn-finger	General function prediction only	POORLY CHARACTERIZED	IPR007087	Zinc finger, C2H2-type
298081	0.109789	1.30561e-12	0.443565	0.00119234	144.191	15.8306	63.9581	1278	270	5.3.3.2	Isopentenyl-diphosphate delta-isomerase.	isoprenoid biosynthetic process	GO:0008299	KOG0142	Isopentenyl pyrophosphate:dimethylallyl pyrophosphate isomerase	Secondary metabolites biosynthesis, transport and catabolism	METABOLISM	IPR015797	NUDIX
347784	0.110045	8.32934e-20	0.0320774	8.79349e-23	66.5881	7.32769	2.13597	873	291	4.2.1.18	Methylglutaconyl-CoA hydratase.	methylglutaconyl-CoA hydratase activity	GO:0004490	KOG1679	Enoyl-CoA hydratase	Lipid transport and metabolism	METABOLISM	IPR001753	Crotonase, core
314139	0.110238	6.87408e-05	0.575883	0.346324	8.57052	0.9448	4.93562	513	108
347270	0.110328	4.20581e-19	0.939949	0.689257	39.8129	4.39246	37.4221	1461	487	3.6.1.3	Adenosinetriphosphatase.	ATPase activity, coupled to transmembrane movement of substances	GO:0042626	KOG1187	Serine/threonine protein kinase	Signal transduction mechanisms	CELLULAR PROCESSES AND SIGNALING	IPR007087	Zinc finger, C2H2-type
329104	0.110556	3.57578e-08	2.263	0.00257622	16.0207	1.77118	36.2549	559	71
188272	0.110561	5.43723e-45	0.193818	6.76564e-22	127.8	14.1297	24.77	270	90									IPR009069	MTCP1
316222	0.110563	1.26272e-07	0.101944	1.56281e-07	550.664	60.8831	56.1369	1828	472	1.14.13.9	Kynurenine 3-monooxygenase.	kynurenine 3-monooxygenase activity	GO:0004502	KOG2614	Kynurenine 3-monooxygenase and related flavoprotein monooxygenases	General function prediction only	POORLY CHARACTERIZED	IPR006076	FAD dependent oxidoreductase
342163	0.111319	0.0130036	0.436443	0.323782	3.65516	0.406888	1.59527	804	268					KOG3262	H/ACA small nucleolar RNP component GAR1	Translation, ribosomal structure and biogenesis	INFORMATION STORAGE AND PROCESSING
307019	0.1116	8.85711e-17	0.109805	2.14859e-16	850.998	94.9716	93.4437	2119	430					KOG1843	Uncharacterized conserved protein	Function unknown	POORLY CHARACTERIZED	IPR001452	Src homology-3
325519	0.112457	2.09346e-25	1.56391	0.00458407	65.0622	7.31667	101.751	1129	226	2.5.1.18	Glutathione transferase.	glutathione transferase activity	GO:0004364					IPR012336	Thioredoxin-like fold
297168	0.112502	1.55082e-21	0.787842	0.701447	92.5754	10.4149	72.9347	1363	330			intracellular	GO:0005622	KOG1747	Protein tyrosine kinase 9/actin monomer-binding protein	Extracellular structures	CELLULAR PROCESSES AND SIGNALING	IPR002108	Actin-binding, cofilin/tropomyosin type
276831	0.11259	5.21089e-18	0.194503	4.85373e-12	37.9147	4.26884	7.37452	1401	395					KOG1187	Serine/threonine protein kinase	Signal transduction mechanisms	CELLULAR PROCESSES AND SIGNALING
315939	0.112608	0.000354404	0	1.77102e-05	7.07987	0.797253	0	451	53
191507	0.112624	0.00185809	0	0.00014238	5.70942	0.643018	0	192	64
[truncated: 581 more rows]

[truncated: 5 more sheets: Table 11  , Table 12 , Table 13    , Table 14   , Table 15  ]
